# Supplementary material for: Novel phosphate-activated macrophages prevent ectopic calcification by increasing extracellular ATP and pyrophosphate
Source: PubMed Central journal article supplement (PMC5376322; doi:10.1371/journal.pone.0174998), 2017-03-31
Supplement: pone.0174998.s001.pdf [file pone.0174998.s001.pdf]

**Title** Novel phosphate-activated macrophages prevent ectopic calcification by increasing extracellular ATP and pyrophosphate  
**Authors** Ricardo Villa-Bellosta, Magda R. Hamczyk, Vicente Andrés

**S1 Table. RNAseq analysis.**

Gene expression profiles of MPIφs and M0φs revealed 3,270 mRNAs differentially expressed in MPIφs versus M0φs.

| ID                  | Name          | Description                                                                                                            | AvrExp      | logFC      | FC                | logCPM     | LR         | PValue      | FDR         | Biotype        |
|---------------------|---------------|------------------------------------------------------------------------------------------------------------------------|-------------|------------|-------------------|------------|------------|-------------|-------------|----------------|
| ENSMUSG00000019987  | Arg1          | arginase, liver [Source:MGJ Symbol;Acc:MGJ:88070]                                                                      | 3,18635723  | 9,82699419 | <b>908,28056</b>  | 1,73463245 | 127,906282 | 1,1767E-19  | 2,11941E-27 | protein_coding |
| ENSMUSG00000009232  | Gm20521       | predicted gene 20521 [Source:MGJ Symbol;Acc:MGJ:5141986]                                                               | 1,894828691 | 8,76899614 | <b>436,245408</b> | 0,90861575 | 81,205036  | 2,03473E-29 | 1,42392E-17 | protein_coding |
| ENSMUSG00000029372  | Pbbp          | pro-platelet basic protein [Source:MGJ Symbol;Acc:MGJ:1888712]                                                         | 10,27183938 | 7,49406047 | <b>180,275617</b> | 3,38805538 | 316,252803 | 9,48717E-71 | 7,4454E-68  | protein_coding |
| ENSMUSG000000027562 | Car2          | carbonic anhydrase 2 [Source:MGJ Symbol;Acc:MGJ:88269]                                                                 | 1,614128295 | 6,22956427 | <b>75,0387697</b> | 0,71441254 | 65,1141033 | 7,06844E-16 | 3,36194E-14 | protein_coding |
| ENSMUSG000000024245 | Tmem178       | transmembrane protein 178 [Source:MGJ Symbol;Acc:MGJ:1915277]                                                          | 2,643875279 | 6,04055238 | <b>65,8244831</b> | 1,42329564 | 93,4306829 | 4,20678E-22 | 4,05438E-20 | protein_coding |
| ENSMUSG00000029373  | Pf4           | platelet factor 4 [Source:MGJ Symbol;Acc:MGJ:1888711]                                                                  | 238,5255262 | 5,92200193 | <b>60,6317658</b> | 7,89896858 | 598,58446  | 3,4017E-132 | 3,7374E-128 | protein_coding |
| ENSMUSG00000030162  | Olr1          | oxidized low density lipoprotein (lectin-like) receptor 1 [Source:MGJ Symbol;Acc:MGJ:1261434]                          | 11,25854041 | 5,60138256 | <b>48,5494336</b> | 3,51649579 | 294,633806 | 4,86317E-66 | 2,81219E-63 | protein_coding |
| ENSMUSG000000004814 | Col24         | chemokine (C-C motif) ligand 24 [Source:MGJ Symbol;Acc:MGJ:1928953]                                                    | 2,640019743 | 5,57670333 | <b>47,7259937</b> | 1,4434368  | 83,1393307 | 7,6469E-20  | 5,564E-18   | protein_coding |
| ENSMUSG00000007655  | Cav1          | caveolin 1, caveolae protein [Source:MGJ Symbol;Acc:MGJ:102709]                                                        | 15,63788095 | 5,38844435 | <b>46,4896657</b> | 3,97337774 | 322,715392 | 3,71054E-72 | 3,13598E-69 | protein_coding |
| ENSMUSG00000025804  | Ccr1          | chemokine (C-C motif) receptor 1 [Source:MGJ Symbol;Acc:MGJ:104618]                                                    | 21,10954132 | 5,52979988 | <b>46,1993255</b> | 4,42093095 | 484,152721 | 2,6677E-107 | 7,3274E-104 | protein_coding |
| ENSMUSG0000001281   | Iitgb7        | integrin beta 7 [Source:MGJ Symbol;Acc:MGJ:96616]                                                                      | 18,50262478 | 5,2730177  | <b>38,6666455</b> | 4,21429548 | 389,917751 | 8,62547E-87 | 1,57947E-83 | protein_coding |
| ENSMUSG00000028583  | Pdpr          | podoplanin [Source:MGJ Symbol;Acc:MGJ:103098]                                                                          | 18,94297446 | 5,23039541 | <b>37,5410062</b> | 4,25458555 | 347,376899 | 1,57893E-77 | 1,73477E-74 | protein_coding |
| ENSMUSG000000096951 |               | Podoplanin [Source:UniProtKB/TrEMBL;Acc:A8Y5F6]                                                                        | 18,94297446 | 5,23038855 | <b>37,5408277</b> | 4,25458796 | 347,446799 | 1,52455E-77 | 1,73477E-74 | protein_coding |
| ENSMUSG00000027315  | Spint1        | serine protease inhibitor, Kunitz type 1 [Source:MGJ Symbol;Acc:MGJ:1338033]                                           | 6,074542701 | 5,01593113 | <b>32,3553219</b> | 2,60890259 | 128,274506 | 9,77446E-30 | 1,78987E-27 | protein_coding |
| ENSMUSG00000029819  | Npy           | neuropeptide Y [Source:MGJ Symbol;Acc:MGJ:97374]                                                                       | 31,78050909 | 4,80717685 | <b>27,9965441</b> | 4,99458787 | 350,670888 | 3,02722E-78 | 4,15751E-75 | protein_coding |
| ENSMUSG000000051379 | Fitr3         | fibronectin leucine rich transmembrane protein 3 [Source:MGJ Symbol;Acc:MGJ:1918686]                                   | 6,716004208 | 4,61347282 | <b>24,4790017</b> | 2,76788845 | 150,970836 | 1,06356E-34 | 2,59674E-32 | protein_coding |
| ENSMUSG000000027399 | Il1a          | interleukin 1 alpha [Source:MGJ Symbol;Acc:MGJ:96542]                                                                  | 6,078538089 | 4,3766692  | <b>20,7737418</b> | 2,63649758 | 129,677332 | 4,8211E-30  | 9,3598E-28  | protein_coding |
| ENSMUSG000000053338 | Tarm1         | T cell-interacting, activating receptor on myeloid cells 1 [Source:MGJ Symbol;Acc:MGJ:2442280]                         | 3,565705006 | 4,36852176 | <b>20,665469</b>  | 1,8668365  | 87,6867325 | 6,68730E-21 | 6,38304E-19 | protein_coding |
| ENSMUSG00000029379  | Cxcl3         | chemokine (C-X-C motif) ligand 3 [Source:MGJ Symbol;Acc:MGJ:3037818]                                                   | 32,78140215 | 4,35173814 | <b>20,417554</b>  | 5,05752802 | 503,639229 | 1,5352E-111 | 5,6223E-108 | protein_coding |
| ENSMUSG00000028111  | Ctsk          | cathepsin K [Source:MGJ Symbol;Acc:MGJ:107823]                                                                         | 30,91543326 | 4,33428138 | <b>20,1719882</b> | 4,95145961 | 100,516982 | 1,17386E-23 | 1,25216E-21 | protein_coding |
| ENSMUSG00000004105  | Angptl2       | angiopoietin-like 2 [Source:MGJ Symbol;Acc:MGJ:1347002]                                                                | 38,02418501 | 4,3218223  | <b>19,9985334</b> | 5,25082965 | 119,745775 | 7,19103E-28 | 1,16188E-25 | protein_coding |
| ENSMUSG00000030208  | Emp1          | epithelial membrane protein 1 [Source:MGJ Symbol;Acc:MGJ:107941]                                                       | 125,4311247 | 4,29376953 | <b>19,6134243</b> | 6,97266152 | 312,484802 | 6,27963E-70 | 4,59926E-67 | protein_coding |
| ENSMUSG00000033213  | AA467197      | expressed sequence AA467197 [Source:MGJ Symbol;Acc:MGJ:3034182]                                                        | 2,108745164 | 4,26016689 | <b>19,1618757</b> | 1,13339309 | 61,0414341 | 5,58861E-15 | 2,2997E-13  | protein_coding |
| ENSMUSG000000040026 | Saa3          | serum amyloid A 3 [Source:MGJ Symbol;Acc:MGJ:98223]                                                                    | 726,1513243 | 4,22604591 | <b>18,7139981</b> | 9,50521395 | 433,925372 | 2,27269E-96 | 4,99401E-93 | protein_coding |
| ENSMUSG000000003882 | Il7r          | interleukin 7 receptor [Source:MGJ Symbol;Acc:MGJ:96562]                                                               | 85,13069302 | 4,16546171 | <b>17,9443991</b> | 6,41241668 | 132,898281 | 9,51649E-31 | 2,01072E-28 | protein_coding |
| ENSMUSG00000071174  | Csf2rb2       | colony stimulating factor 2 receptor, beta 2, low-affinity (granulocyte-macrophage) [Source:MGJ Symbol;Acc:MGJ:133976] | 151,784956  | 4,15579024 | <b>17,8245066</b> | 7,2469988  | 293,726184 | 7,66782E-66 | 4,21232E-63 | protein_coding |
| ENSMUSG00000061878  | Sphk1         | sphingosine kinase 1 [Source:MGJ Symbol;Acc:MGJ:1316649]                                                               | 6,486873259 | 4,15316721 | <b>17,7921285</b> | 2,69969877 | 101,281795 | 7,97857E-24 | 8,59417E-22 | protein_coding |
| ENSMUSG00000027068  | Dhrs9         | dehydrogenase/reductase (SDR family) member 9 [Source:MGJ Symbol;Acc:MGJ:2442798]                                      | 6,020706741 | 4,14786271 | <b>17,7268305</b> | 2,60398815 | 106,216031 | 6,61196E-25 | 8,16243E-23 | protein_coding |
| ENSMUSG000000021403 | Serp1nb9b     | serine (or cysteine) peptidase inhibitor, clade B, member 9b [Source:MGJ Symbol;Acc:MGJ:894668]                        | 31,74720454 | 4,14223656 | <b>17,657835</b>  | 4,99311294 | 182,846733 | 1,15848E-41 | 4,10588E-39 | protein_coding |
| ENSMUSG00000005800  | Mmp8          | matrix metalloproteinase 8 [Source:MGJ Symbol;Acc:MGJ:1202395]                                                         | 65,80831607 | 4,10655541 | <b>17,2157294</b> | 6,0452183  | 334,384299 | 1,06635E-74 | 1,06509E-71 | protein_coding |
| ENSMUSG00000001435  | Col18a1       | collagen, type XVIII, alpha 1 [Source:MGJ Symbol;Acc:MGJ:88451]                                                        | 38,57225199 | 4,02175937 | <b>16,2431482</b> | 5,26991752 | 68,3724093 | 1,35358E-16 | 6,98207E-15 | protein_coding |
| ENSMUSG000000032530 | Lyx14         | lysozyme-like 4 [Source:MGJ Symbol;Acc:MGJ:1916282]                                                                    | 2,170312386 | 4,01023106 | <b>16,1138694</b> | 1,13466923 | 54,277907  | 1,74048E-13 | 5,92773E-12 | protein_coding |
| ENSMUSG00000026981  | Il1rn         | interleukin 1 receptor antagonist [Source:MGJ Symbol;Acc:MGJ:96547]                                                    | 285,1757045 | 3,97468773 | <b>15,7217263</b> | 8,15661071 | 310,775016 | 1,48045E-69 | 9,56805E-67 | protein_coding |
| ENSMUSG000000041324 | Inhba         | inhibin beta-A [Source:MGJ Symbol;Acc:MGJ:96570]                                                                       | 3,451797082 | 3,96554619 | <b>15,6224216</b> | 1,80408733 | 48,1408042 | 3,96685E-12 | 1,07881E-10 | protein_coding |
| ENSMUSG00000062345  | Serp1nb2      | serine (or cysteine) peptidase inhibitor, clade B, member 2 [Source:MGJ Symbol;Acc:MGJ:97609]                          | 8,302799823 | 3,95566324 | <b>15,5157684</b> | 3,11215121 | 117,330086 | 2,43055E-27 | 3,70896E-25 | protein_coding |
| ENSMUSG000000027276 | Jag1          | jagged 1 [Source:MGJ Symbol;Acc:MGJ:1095416]                                                                           | 24,57152223 | 3,93958704 | <b>15,3483333</b> | 4,62269175 | 84,1160777 | 4,66561E-20 | 3,51103E-18 | protein_coding |
| ENSMUSG000000027611 | Procr         | protein C receptor, endothelial [Source:MGJ Symbol;Acc:MGJ:104596]                                                     | 80,33326123 | 3,93489744 | <b>15,2940378</b> | 6,32944949 | 172,734099 | 1,87085E-39 | 6,0456E-37  | protein_coding |
| ENSMUSG00000034226  | Rhov          | ras homolog gene family, member V [Source:MGJ Symbol;Acc:MGJ:2444227]                                                  | 7,144914353 | 3,83301108 | <b>14,2511958</b> | 2,83244247 | 74,9905134 | 4,72981E-18 | 2,7939E-16  | protein_coding |
| ENSMUSG00000037406  | Htra4         | Htra serine peptidase 4 [Source:MGJ Symbol;Acc:MGJ:3036260]                                                            | 2,51459752  | 3,79990541 | <b>13,9278958</b> | 1,34038594 | 52,9372242 | 3,44381E-13 | 1,09041E-11 | protein_coding |
| ENSMUSG000000074604 | Mgst2         | microsomal glutathione S-transferase 2 [Source:MGJ Symbol;Acc:MGJ:2448481]                                             | 2,273277907 | 3,77574262 | <b>13,6965688</b> | 1,19073717 | 47,9116468 | 4,45865E-12 | 1,19773E-10 | protein_coding |
| ENSMUSG000000029304 | Spp1          | secreted phosphoprotein 1 [Source:MGJ Symbol;Acc:MGJ:98389]                                                            | 999,3238232 | 3,75941456 | <b>13,5424285</b> | 9,96487279 | 85,9272694 | 1,86677E-20 | 1,45462E-18 | protein_coding |
| ENSMUSG00000071064  | Zfp827        | zinc finger protein 827 [Source:MGJ Symbol;Acc:MGJ:2444807]                                                            | 2,888074892 | 3,71854692 | <b>13,1641906</b> | 1,56030583 | 56,067012  | 7,00225E-14 | 2,58665E-12 | protein_coding |
| ENSMUSG00000021508  | Cxcl14        | chemokine (C-X-C motif) ligand 14 [Source:MGJ Symbol;Acc:MGJ:1888514]                                                  | 1,731009265 | 3,69525159 | <b>12,9533342</b> | 0,79665362 | 43,8632314 | 3,52142E-11 | 8,35635E-10 | protein_coding |
| ENSMUSG000000038059 | 2010002N04Rik | RIKEN cDNA 2010002N04 gene [Source:MGJ Symbol;Acc:MGJ:1917088]                                                         | 10,85640086 | 3,63517203 | <b>12,4249835</b> | 3,45009383 | 162,008037 | 4,12034E-37 | 1,16077E-34 | protein_coding |
| ENSMUSG000000028327 | 1300002K09Rik | RIKEN cDNA 1300002K09 gene [Source:MGJ Symbol;Acc:MGJ:1921402]                                                         | 10,15069841 | 3,61785881 | <b>12,2767673</b> | 3,34920653 | 62,904251  | 2,17003E-15 | 9,69193E-14 | protein_coding |
| ENSMUSG000000031444 | F10           | coagulation factor X [Source:MGJ Symbol;Acc:MGJ:103107]                                                                | 6,367979468 | 3,61140298 | <b>12,2219534</b> | 2,70470014 | 120,024345 | 6,24891E-28 | 1,02473E-25 | protein_coding |
| ENSMUSG000000003849 | Nqo1          | NAD(P)H dehydrogenase, quinone 1 [Source:MGJ Symbol;Acc:MGJ:103187]                                                    | 47,79298872 | 3,60885497 | <b>12,2003867</b> | 5,58313938 | 267,482646 | 4,01388E-60 | 2,00457E-57 | protein_coding |
| ENSMUSG000000049723 | Mmp12         | matrix metalloproteinase 12 [Source:MGJ Symbol;Acc:MGJ:97005]                                                          | 541,4455138 | 3,5596592  | <b>11,791368</b>  | 9,08080494 | 76,4426769 | 2,26699E-18 | 1,39147E-16 | protein_coding |
| ENSMUSG000000074634 | Gm7120        | predicted gene 7120 [Source:MGJ Symbol;Acc:MGJ:3648543]                                                                | 3,119222907 | 3,5560422  | <b>11,7582726</b> | 1,65630035 | 52,7331056 | 3,82096E-13 | 1,19945E-11 | protein_coding |
| ENSMUSG000000047414 | Flrt2         | fibronectin leucine rich transmembrane protein 2 [Source:MGJ Symbol;Acc:MGJ:3603594]                                   | 26,35033824 | 3,55256898 | <b>11,7335602</b> | 4,72631304 | 151,696461 | 7,38188E-35 | 1,88616E-32 | protein_coding |
| ENSMUSG00000045092  | S1pr1         | sphingosine-1-phosphate receptor 1 [Source:MGJ Symbol;Acc:MGJ:1096355]                                                 | 15,76880043 | 3,54452246 | <b>11,6682998</b> | 3,98290239 | 103,69939  | 2,35646E-24 | 2,66705E-22 | protein_coding |
| ENSMUSG000000030142 | Clec4e        | C-type lectin domain family 4, member e [Source:MGJ Symbol;Acc:MGJ:1861232]                                            | 122,9732319 | 3,54215574 | <b>11,6491739</b> | 6,95038428 | 508,522762 | 1,3293E-112 | 7,3025E-109 | protein_coding |
| ENSMUSG00000026832  | Cytip         | cytohesin 1 interacting protein [Source:MGJ Symbol;Acc:MGJ:2183535]                                                    | 5,578102351 | 3,48250725 | <b>11,1773575</b> | 2,48946438 | 77,9823729 | 1,03964E-18 | 6,7589E-17  | protein_coding |
| ENSMUSG00000045636  | Mtus1         | mitochondrial tumor suppressor 1 [Source:MGJ Symbol;Acc:MGJ:2142572]                                                   | 2,954999524 | 3,47513395 | <b>11,1203782</b> | 1,57896284 | 62,0937449 | 3,2749E-15  | 1,42111E-13 | protein_coding |
| ENSMUSG000000090145 | Ugt1a6b       | UDP glucuronosyltransferase 1 family, polypeptide A6B [Source:MGJ Symbol;Acc:MGJ:3580629]                              | 10,93774141 | 3,46108036 | <b>11,0125782</b> | 3,46254161 | 104,667698 | 1,44437E-24 | 1,68822E-22 | protein_coding |
| ENSMUSG000000050860 | Phospho1      | phosphatase, orphan 1 [Source:MGJ Symbol;Acc:MGJ:2447348]                                                              | 11,61462687 | 3,45844196 | <b>10,9924568</b> | 3,53871831 | 108,309093 | 2,29873E-25 | 3,00669E-23 | protein_coding |
| ENSMUSG000000070942 | Il1rl2        | interleukin 1 receptor-like 2 [Source:MGJ Symbol;Acc:MGJ:1913107]                                                      | 2,261186855 | 3,43458286 | <b>10,81216</b>   | 1,19266426 | 43,9308051 | 3,40192E-11 | 8,10594E-10 | protein_coding |
| ENSMUSG000000037759 | Ptger2        | prostaglandin E receptor 2 (subtype EP2) [Source:MGJ Symbol;Acc:MGJ:97794]                                             | 10,09530626 | 3,42769577 | <b>10,7606663</b> | 3,36660947 | 162,288564 | 3,57805E-37 | 1,03453E-34 | protein_coding |
| ENSMUSG000000034220 | Gpc1          | glypican 1 [Source:MGJ Symbol;Acc:MGJ:1194891]                                                                         | 20,80965916 | 3,40220425 | <b>10,5722039</b> | 4,38325809 | 103,38017  | 2,7663E-24  | 3,07003E-22 | protein_coding |
| ENSMUSG000000050578 | Mmp13         | matrix metalloproteinase 13 [Source:MGJ Symbol;Acc:MGJ:1340026]                                                        | 65,32048684 | 3,39707735 | <b>10,5347002</b> | 6,03193008 | 158,188833 | 2,81436E-36 | 7,54181E-34 | protein_coding |
| ENSMUSG000000040562 | Gstm2         | glutathione S-transferase, mu 2 [Source:MGJ Symbol;Acc:MGJ:95861]                                                      | 4,680217607 | 3,38979498 | <b>10,4816576</b> |            |            |             |             |                |

|                     |               |                                                                                                                       |             |            |                   |            |            |              |             |                |
|---------------------|---------------|-----------------------------------------------------------------------------------------------------------------------|-------------|------------|-------------------|------------|------------|--------------|-------------|----------------|
| ENSMUSG00000050335  | Lgals3        | lectin, galactose binding, soluble 3 [Source:MGI Symbol;Acc:MGI:967778]                                               | 1417,037389 | 3,38348777 | <b>10,4359336</b> | 10,4686983 | 86,890081  | 1,14723E-20  | 9,1338E-19  | protein_coding |
| ENSMUSG00000030342  | Cd9           | CD9 antigen [Source:MGI Symbol;Acc:MGI:88348]                                                                         | 118,9544418 | 3,38123251 | <b>10,4196327</b> | 6,89538037 | 152,707791 | 4,43747E-35  | 1,16082E-32 | protein_coding |
| ENSMUSG00000059412  | Fxyd2         | FXD domain-containing ion transport regulator 2 [Source:MGI Symbol;Acc:MGI:1195260]                                   | 23,74713166 | 3,37266259 | <b>10,3579212</b> | 4,57087535 | 244,429018 | 4,256116E-55 | 1,8705E-52  | protein_coding |
| ENSMUSG00000029816  | Gpnm6         | glycoprotein (transmembrane) nmb [Source:MGI Symbol;Acc:MGI:1934765]                                                  | 3903,546345 | 3,376078   | <b>10,3451166</b> | 11,9305821 | 60,2505036 | 8,35215E-15  | 3,37371E-13 | protein_coding |
| ENSMUSG00000045312  | Lhfp12        | lipoma HMGIC fusion partner-like 2 [Source:MGI Symbol;Acc:MGI:2145236]                                                | 163,154242  | 3,35067012 | <b>10,2012223</b> | 7,3505658  | 133,699089 | 6,35678E-31  | 1,36964E-28 | protein_coding |
| ENSMUSG00000023349  | Clec4n        | C-type lectin domain family 4, member n [Source:MGI Symbol;Acc:MGI:1861231]                                           | 35,29995447 | 3,33053149 | <b>10,0598124</b> | 5,158963   | 311,820145 | 8,7644E-70   | 6,0184E-67  | protein_coding |
| ENSMUSG00000045382  | Cxcr4         | chemokine (C-X-C motif) receptor 4 [Source:MGI Symbol;Acc:MGI:109563]                                                 | 33,49674366 | 3,29999648 | <b>9,84913131</b> | 5,06781758 | 92,1613553 | 7,98897E-22  | 7,43854E-20 | protein_coding |
| ENSMUSG00000038729  | Akap2         | A kinase (PRKA) anchor protein 2 [Source:MGI Symbol;Acc:MGI:1306795]                                                  | 7,62468513  | 3,29382242 | <b>9,80707169</b> | 2,93497781 | 22,3133425 | 2,31592E-06  | 2,32374E-05 | protein_coding |
| ENSMUSG00000037994  | Nhed2         | Na+/H+ exchanger domain containing 2 [Source:MGI Symbol;Acc:MGI:2140077]                                              | 4,813367023 | 3,28202979 | <b>9,72722286</b> | 2,28158799 | 72,0751683 | 2,07154E-17  | 1,1495E-15  | protein_coding |
| ENSMUSG00000072941  | Sod3          | superoxide dismutase 3, extracellular [Source:MGI Symbol;Acc:MGI:103181]                                              | 2,860598695 | 3,2164524  | <b>9,2949841</b>  | 1,53999686 | 25,2700795 | 4,9838E-07   | 5,71576E-06 | protein_coding |
| ENSMUSG00000028341  | Nr4a3         | nuclear receptor subfamily 4, group A, member 3 [Source:MGI Symbol;Acc:MGI:1352457]                                   | 13,06451201 | 3,20963651 | <b>9,25117431</b> | 3,72778622 | 169,939597 | 7,62709E-39  | 3,2775E-36  | protein_coding |
| ENSMUSG00000030657  | Xylt1         | xylonyltransferase 1 [Source:MGI Symbol;Acc:MGI:2451073]                                                              | 3,544831942 | 3,19565264 | <b>9,161937</b>   | 1,84720632 | 54,0589458 | 1,94564E-13  | 6,21495E-12 | protein_coding |
| ENSMUSG00000015094  | Npdc1         | neural proliferation, differentiation and control gene 1 [Source:MGI Symbol;Acc:MGI:1099802]                          | 4,023096384 | 3,17405692 | <b>9,02581319</b> | 2,01075786 | 21,4158726 | 3,69698E-06  | 5,56619E-05 | protein_coding |
| ENSMUSG00000028238  | Atp6v0d2      | ATPase, H+ transporting, lysosomal V0 subunit D2 [Source:MGI Symbol;Acc:MGI:1924415]                                  | 49,12694519 | 3,16255001 | <b>8,95410979</b> | 5,61986427 | 88,1153343 | 6,17471E-21  | 5,30012E-19 | protein_coding |
| ENSMUSG00000014599  | Csf1          | colony stimulating factor 1 (macrophage) [Source:MGI Symbol;Acc:MGI:1339753]                                          | 31,29511396 | 3,16204194 | <b>8,95095699</b> | 4,97111589 | 46,441294  | 9,44049E-12  | 2,4348E-10  | protein_coding |
| ENSMUSG00000025856  | Pdgfra        | platelet derived growth factor, alpha [Source:MGI Symbol;Acc:MGI:97527]                                               | 10,11056327 | 3,15467949 | <b>8,90539429</b> | 3,3427683  | 99,3791383 | 2,08507E-23  | 2,20276E-21 | protein_coding |
| ENSMUSG00000054543  | Ugt1a6a       | UDP glucuronosyltransferase 1 family, polypeptide A6A [Source:MGI Symbol;Acc:MGI:2137698]                             | 18,68304191 | 3,14954638 | <b>8,87376519</b> | 4,2314369  | 128,79189  | 7,53153E-30  | 1,40252E-27 | protein_coding |
| ENSMUSG00000026822  | Lcn2          | lipocalin 2 [Source:MGI Symbol;Acc:MGI:96757]                                                                         | 18,65933809 | 3,11397955 | <b>8,65767442</b> | 4,26967061 | 185,377659 | 3,24603E-42  | 1,1888E-39  | protein_coding |
| ENSMUSG00000064080  | Fbln2         | fibulin 2 [Source:MGI Symbol;Acc:MGI:95488]                                                                           | 4,397877747 | 3,11222182 | <b>8,64713267</b> | 2,15683102 | 21,8550016 | 2,94049E-06  | 2,88973E-05 | protein_coding |
| ENSMUSG00000019256  | Ahr           | aryl-hydrocarbon receptor [Source:MGI Symbol;Acc:MGI:105043]                                                          | 7,378515153 | 3,10942474 | <b>8,5237462</b>  | 2,90791326 | 97,2587859 | 6,80835E-23  | 6,1319E-21  | protein_coding |
| ENSMUSG00000020399  | Havcr2        | hepatitis A virus cellular receptor 2 [Source:MGI Symbol;Acc:MGI:2159682]                                             | 10,51627942 | 3,07867195 | <b>8,44836375</b> | 3,39781247 | 108,066753 | 2,59876E-25  | 3,20070E-23 | protein_coding |
| ENSMUSG00000021477  | Ctsl          | cathepsin L [Source:MGI Symbol;Acc:MGI:88564]                                                                         | 1548,358992 | 3,07007023 | <b>8,40183954</b> | 10,596579  | 102,367593 | 4,61185E-24  | 5,01687E-22 | protein_coding |
| ENSMUSG00000047415  | Gpr68         | G protein-coupled receptor 68 [Source:MGI Symbol;Acc:MGI:2441763]                                                     | 5,562629747 | 3,06338096 | <b>8,35929319</b> | 2,47746567 | 77,9370348 | 1,06378E-18  | 6,87515E-17 | protein_coding |
| ENSMUSG00000031530  | Dusp4         | dual specificity phosphatase 4 [Source:MGI Symbol;Acc:MGI:2442191]                                                    | 38,57088817 | 3,05813662 | <b>8,32891651</b> | 5,27108109 | 62,385728  | 2,82362E-15  | 1,24591E-13 | protein_coding |
| ENSMUSG00000046223  | Plaur         | plasminogen activator, urokinase receptor [Source:MGI Symbol;Acc:MGI:97612]                                           | 26,05651385 | 3,05788439 | <b>8,32750541</b> | 4,70632718 | 135,780462 | 2,22857E-31  | 4,89070E-29 | protein_coding |
| ENSMUSG00000050390  | C77080        | expressed sequence C77080 [Source:MGI Symbol;Acc:MGI:2140651]                                                         | 30,41720238 | 3,05644365 | <b>8,31919339</b> | 4,9262876  | 73,093633  | 1,23643E-17  | 7,00239E-16 | protein_coding |
| ENSMUSG00000029762  | Akr1b8        | aldo-keto reductase family 1, member B8 [Source:MGI Symbol;Acc:MGI:107673]                                            | 53,13673239 | 3,05364371 | <b>8,30306335</b> | 5,73423972 | 89,590343  | 2,92951E-21  | 2,63824E-19 | protein_coding |
| ENSMUSG00000032561  | Acpp          | acid phosphatase, prostatic [Source:MGI Symbol;Acc:MGI:1928480]                                                       | 17,64708722 | 3,05305402 | <b>8,29967028</b> | 4,15147298 | 128,816316 | 7,43941E-30  | 1,10252E-27 | protein_coding |
| ENSMUSG00000025934  | Gsta3         | glutathione S-transferase, alpha 3 [Source:MGI Symbol;Acc:MGI:95856]                                                  | 14,51075494 | 3,04872535 | <b>8,27480523</b> | 3,86560415 | 53,5503077 | 2,52055E-13  | 8,19328E-12 | protein_coding |
| ENSMUSG00000010461  | Eya4          | eyes absent 4 homolog (Drosophila) [Source:MGI Symbol;Acc:MGI:1337104]                                                | 8,655133746 | 3,04850453 | <b>8,27353875</b> | 3,12146786 | 68,5874891 | 1,21372E-16  | 6,29014E-15 | protein_coding |
| ENSMUSG00000021822  | Plau          | plasminogen activator, urokinase [Source:MGI Symbol;Acc:MGI:97611]                                                    | 65,75156569 | 3,03704411 | <b>8,2080761</b>  | 6,04034236 | 84,0386839 | 4,85188E-20  | 3,62636E-18 | protein_coding |
| ENSMUSG00000079227  | Ccr5          | chemokine (C-C motif) receptor 5 [Source:MGI Symbol;Acc:MGI:107182]                                                   | 23,91624581 | 3,03658122 | <b>8,20544296</b> | 4,60958606 | 253,429071 | 4,64399E-57  | 2,12598E-54 | protein_coding |
| ENSMUSG00000030109  | Slc6a12       | solute carrier family 6 (neurotransmitter transporter, betaine/GABA), member 12 [Source:MGI Symbol;Acc:MGI:95628]     | 60,19991221 | 3,03592462 | <b>8,20170935</b> | 5,91572887 | 378,566685 | 2,55281E-84  | 4,00681E-81 | protein_coding |
| ENSMUSG00000063506  | Arhgap22      | Rho GTPase activating protein 22 [Source:MGI Symbol;Acc:MGI:2443418]                                                  | 16,37112505 | 3,03139732 | <b>8,17601204</b> | 4,03721882 | 127,853694 | 1,2083E-29   | 2,14122E-27 | protein_coding |
| ENSMUSG00000027737  | Slc7a11       | solute carrier family 7 (cationic amino acid transporter, y+ system), member 11 [Source:MGI Symbol;Acc:MGI:1347355]   | 121,6362898 | 3,02984973 | <b>8,16724625</b> | 6,92901682 | 171,737164 | 3,08861E-39  | 9,6956E-37  | protein_coding |
| ENSMUSG00000026463  | Atp2b4        | ATPase, Ca++ transporting, plasma membrane 4 [Source:MGI Symbol;Acc:MGI:88111]                                        | 4,678952054 | 3,01000449 | <b>8,05566949</b> | 2,24513237 | 48,9076063 | 2,68308E-12  | 7,57816E-11 | protein_coding |
| ENSMUSG00000018500  | Adora2b       | adenosine A2b receptor [Source:MGI Symbol;Acc:MGI:99403]                                                              | 2,712094921 | 3,00251053 | <b>8,01393343</b> | 1,47666178 | 40,0051797 | 2,5329E-10   | 5,33123E-09 | protein_coding |
| ENSMUSG00000023992  | Trem2         | triggering receptor expressed on myeloid cells 2 [Source:MGI Symbol;Acc:MGI:1913150]                                  | 153,9850446 | 3,00079031 | <b>8,00438364</b> | 7,266862   | 52,9899898 | 3,35253E-13  | 1,06766E-11 | protein_coding |
| ENSMUSG00000020689  | Iitg3         | integrin beta 3 [Source:MGI Symbol;Acc:MGI:96612]                                                                     | 7,466099955 | 2,99449588 | <b>7,96953685</b> | 2,9013282  | 29,3869812 | 5,92745E-08  | 8,22284E-07 | protein_coding |
| ENSMUSG00000023232  | Serinc2       | serine incorporator 2 [Source:MGI Symbol;Acc:MGI:1919132]                                                             | 3,906476371 | 2,98903553 | <b>7,93943054</b> | 1,97393488 | 39,2437252 | 3,74069E-10  | 7,6392E-09  | protein_coding |
| ENSMUSG00000025636  | Rai14         | retinoic acid induced 14 [Source:MGI Symbol;Acc:MGI:1922896]                                                          | 16,56326466 | 2,98235188 | <b>7,90273416</b> | 4,05949714 | 105,472191 | 9,62391E-25  | 1,14932E-22 | protein_coding |
| ENSMUSG00000029189  | Sei113        | sei-1 suppressor of lin-12-like 3 (C. elegans) [Source:MGI Symbol;Acc:MGI:1916941]                                    | 10,05425058 | 2,95690494 | <b>7,7645641</b>  | 3,33822025 | 97,8827931 | 4,43894E-23  | 4,55801E-21 | protein_coding |
| ENSMUSG00000027765  | P2ry1         | purinergic receptor P2Y, G-protein coupled 1 [Source:MGI Symbol;Acc:MGI:105049]                                       | 4,292988562 | 2,95313541 | <b>7,74430303</b> | 2,10847694 | 48,381525  | 3,086E-12    | 9,66141E-11 | protein_coding |
| ENSMUSG00000017417  | Pplxdc1       | plexin domain containing 1 [Source:MGI Symbol;Acc:MGI:1919574]                                                        | 9,070485307 | 2,93869893 | <b>7,66719529</b> | 3,18594719 | 49,5155122 | 1,96890E-12  | 5,66059E-11 | protein_coding |
| ENSMUSG00000029207  | Apbb2         | amyloid beta (A4) precursor protein-binding, family B, member 2 [Source:MGI Symbol;Acc:MGI:108405]                    | 17,07157623 | 2,92818547 | <b>7,61152468</b> | 4,0970387  | 75,7732422 | 3,18184E-18  | 1,91109E-16 | protein_coding |
| ENSMUSG00000021338  | Lrrc16a       | leucine rich repeat containing 16A [Source:MGI Symbol;Acc:MGI:1915982]                                                | 7,448945074 | 2,92581001 | <b>7,59900227</b> | 2,89947384 | 61,8914309 | 3,62925E-15  | 1,55244E-13 | protein_coding |
| ENSMUSG00000071713  | Csf2rb        | colony stimulating factor 2 receptor, beta, low-affinity (granulocyte-macrophage) [Source:MGI Symbol;Acc:MGI:1339759] | 321,064739  | 2,89710278 | <b>7,44928922</b> | 8,32746672 | 229,134945 | 9,20446E-52  | 3,88959E-49 | protein_coding |
| ENSMUSG00000051029  | Serpinb1b     | serine (or cysteine) peptidase inhibitor, clade B, member 1b [Source:MGI Symbol;Acc:MGI:2445361]                      | 2,250176769 | 2,88004277 | <b>7,36171945</b> | 1,18413032 | 41,0183006 | 1,5081E-10   | 3,25531E-09 | protein_coding |
| ENSMUSG00000049866  | Ari4c         | ADP-ribosylation factor-like 4C [Source:MGI Symbol;Acc:MGI:2445172]                                                   | 102,0653735 | 2,87594462 | <b>7,34083725</b> | 6,6752663  | 268,716807 | 2,16052E-60  | 1,13041E-57 | protein_coding |
| ENSMUSG00000035448  | Ccr3          | chemokine (C-C motif) receptor 3 [Source:MGI Symbol;Acc:MGI:104616]                                                   | 16,61635373 | 2,87165623 | <b>7,31904913</b> | 4,0759344  | 132,324842 | 1,27058E-30  | 2,63393E-28 | protein_coding |
| ENSMUSG00000017002  | Slpi          | secretory leukocyte peptidase inhibitor [Source:MGI Symbol;Acc:MGI:109297]                                            | 9,968839853 | 2,86874193 | <b>7,30427928</b> | 3,34332979 | 82,8838304 | 8,70201E-20  | 6,93070E-18 | protein_coding |
| ENSMUSG00000037868  | Egr2          | early growth response 2 [Source:MGI Symbol;Acc:MGI:95296]                                                             | 25,30721469 | 2,87078937 | <b>7,19547224</b> | 4,67111096 | 205,258221 | 1,48745E-46  | 5,63539E-44 | protein_coding |
| ENSMUSG00000040152  | Thbs1         | thrombospondin 1 [Source:MGI Symbol;Acc:MGI:98737]                                                                    | 82,33471559 | 2,83149687 | <b>7,11812303</b> | 6,36714796 | 52,6673226 | 3,95111E-13  | 1,23326E-11 | protein_coding |
| ENSMUSG00000025473  | Adam8         | a disintegrin and metallopeptidase domain 8 [Source:MGI Symbol;Acc:MGI:107825]                                        | 482,1253432 | 2,82658435 | <b>7,09392632</b> | 8,91341762 | 70,6597385 | 4,24667E-17  | 2,26389E-15 | protein_coding |
| ENSMUSG00000025044  | Msr1          | macrophage scavenger receptor 1 [Source:MGI Symbol;Acc:MGI:98257]                                                     | 235,3618343 | 2,82646088 | <b>7,09331925</b> | 7,8797973  | 97,9725889 | 4,24214E-23  | 4,39702E-21 | protein_coding |
| ENSMUSG00000023913  | Pla2g7        | phospholipase A2, group VII (platelet-activating factor acetylhydrolase, plasma) [Source:MGI Symbol;Acc:MGI:1351327]  | 362,8218056 | 2,82292521 | <b>7,07960957</b> | 8,5038442  | 137,55959  | 9,09719E-32  | 2,03981E-29 | protein_coding |
| ENSMUSG00000039043  | 2610034B18Rik | RIKEN cDNA 2610034B18 gene [Source:MGI Symbol;Acc:MGI:1917670]                                                        | 8,302059388 | 2,81767395 | <b>7,05024772</b> | 3,07068891 | 57,2220882 | 3,89275E-14  | 1,43042E-12 | protein_coding |
| ENSMUSG00000075014  | Gm10800       | predicted gene 10800 [Source:MGI Symbol;Acc:MGI:3641657]                                                              | 9,390888642 | 2,81606872 | <b>7,04240753</b> | 3,24495722 | 52,2183949 | 4,96588E-13  | 1,5369E-11  | protein_coding |
| ENSMUSG00000030710  | St8sia4       | ST8 alpha-N-acetyl-neuraminidase alpha-2,8-sialyltransferase 4 [Source:MGI Symbol;Acc:MGI:106018]                     | 10,08400288 | 2,81506428 | <b>7,03750614</b> | 3,34676052 | 95,8190995 | 1,25824E-22  | 1,24543E-20 | protein_coding |
| ENSMUSG000000347613 | Tnfrsf23      | tumor necrosis factor receptor superfamily, member 23 [Source:MGI Symbol;Acc:MGI:1930269]                             | 12,52783469 | 2,80947203 | <b>7,01027983</b> | 3,65791933 | 87,6967649 | 7,25919E-21  | 6,38304E-19 | protein_coding |
| ENSMUSG00000031209  | Heph          | hephaestin [Source:MGI Symbol;Acc:MGI:1332240]                                                                        | 1,757072512 | 2,80589205 | <b>6,99290572</b> | 0,85182816 | 23,221688  | 1,4436E-06   | 1,512E-05   | protein_coding |
| ENSMUSG00000056054  | S100a8        | S100 calcium binding protein A8 (calgranulin A) [Source:MGI Symbol;Acc:MGI:88244]                                     | 3,712649527 | 2,79976224 | <b>6,96325687</b> | 1,90867715 | 55,010218  | 1,19905E-13  | 4,06603E-12 | protein_coding |
| ENSMUSG00000028364  | Tnc           | tenascin C [Source:MGI Symbol;Acc:MGI:101922]                                                                         | 4,862212215 | 2,79864263 | <b>6,9</b>        |            |            |              |             |                |

|                    |               |                                                                                                                 |        |             |            |                   |            |            |             |             |                   |
|--------------------|---------------|-----------------------------------------------------------------------------------------------------------------|--------|-------------|------------|-------------------|------------|------------|-------------|-------------|-------------------|
| ENSMUSG00000053965 | Pde5a         | phosphodiesterase 5A, cGMP-specific [Source:MGI Symbol;Acc:MGI:2651499]                                         | Sheet1 | 1,465903725 | 2,71598729 | <b>6,57042772</b> | 0,59266165 | 24,7644409 | 6,47816E-07 | 7,27766E-06 | protein_coding    |
| ENSMUSG00000028517 | Ppap2b        | phosphatidic acid phosphatase type 2B [Source:MGI Symbol;Acc:MGI:1915166]                                       |        | 9,140322901 | 2,70212415 | <b>6,50759358</b> | 3,20051868 | 42,0005648 | 9,12471E-11 | 2,03767E-09 | protein_coding    |
| ENSMUSG00000030103 | Bhlhe4b       | basic helix-loop-helix family, member e40 [Source:MGI Symbol;Acc:MGI:1097714]                                   |        | 21,63436461 | 2,69805316 | <b>6,48925635</b> | 4,44129428 | 130,127719 | 3,84242E-30 | 7,67575E-28 | protein_coding    |
| ENSMUSG00000050777 | Tmem37        | transmembrane protein 37 [Source:MGI Symbol;Acc:MGI:2157899]                                                    |        | 7,581972893 | 2,69778263 | <b>6,48803962</b> | 2,93499528 | 73,2547636 | 1,1395E-17  | 6,48687E-16 | protein_coding    |
| ENSMUSG00000058624 | Gda           | guanine deaminase [Source:MGI Symbol;Acc:MGI:95678]                                                             |        | 6,059555515 | 2,68423203 | <b>6,42738562</b> | 2,62949078 | 59,6112755 | 1,15571E-14 | 4,53493E-13 | protein_coding    |
| ENSMUSG00000032487 | Ptgs2         | prostaglandin-endoperoxide synthase 2 [Source:MGI Symbol;Acc:MGI:97798]                                         |        | 42,08504508 | 2,67136593 | <b>6,37032038</b> | 5,41803814 | 300,349782 | 2,76418E-67 | 1,63722E-64 | protein_coding    |
| ENSMUSG00000079293 | Clec7a        | C-type lectin domain family 7, member a [Source:MGI Symbol;Acc:MGI:1861431]                                     |        | 33,32844724 | 2,65672296 | <b>6,30599036</b> | 5,06290534 | 140,514699 | 2,05429E-32 | 4,70219E-30 | ymorphic_pseudoge |
| ENSMUSG00000012500 | Fos           | FBJ osteosarcoma oncogene [Source:MGI Symbol;Acc:MGI:95574]                                                     |        | 56,82152689 | 2,65388107 | <b>6,29358072</b> | 5,83095813 | 65,131327  | 7,00693E-16 | 3,36179E-14 | protein_coding    |
| ENSMUSG00000049422 | Chchd10       | coiled-coil-helix-coiled-coil-helix domain containing 10 [Source:MGI Symbol;Acc:MGI:2143558]                    |        | 7,355813881 | 2,64670976 | <b>6,26237444</b> | 2,88658554 | 42,3328857 | 7,69871E-11 | 1,74404E-09 | protein_coding    |
| ENSMUSG00000009185 | Ccl8          | chemokine (C-C motif) ligand 8 [Source:MGI Symbol;Acc:MGI:101878]                                               |        | 4,839440896 | 2,637364   | <b>6,22193719</b> | 2,30646795 | 61,8044672 | 3,79313E-15 | 1,61531E-13 | protein_coding    |
| ENSMUSG00000045362 | Tnfrsf26      | tumor necrosis factor receptor superfamily, member 26 [Source:MGI Symbol;Acc:MGI:2651928]                       |        | 23,1548043  | 2,61956376 | <b>6,14564275</b> | 4,54057403 | 90,7227298 | 1,65284E-21 | 1,51331E-19 | protein_coding    |
| ENSMUSG00000037224 | Zfyve28       | zinc finger, FYVE domain containing 28 [Source:MGI Symbol;Acc:MGI:2684992]                                      |        | 7,523582298 | 2,61351313 | <b>6,11992143</b> | 2,91541169 | 42,4771711 | 7,1512E-11  | 1,63348E-09 | protein_coding    |
| ENSMUSG00000042190 | Cmk1r1        | chemokine-like receptor 1 [Source:MGI Symbol;Acc:MGI:109603]                                                    |        | 21,17788911 | 2,60584926 | <b>6,08749745</b> | 4,41702557 | 151,106139 | 9,9355E-35  | 2,48094E-32 | protein_coding    |
| ENSMUSG00000023905 | Tnfrsf12a     | tumor necrosis factor receptor superfamily, member 12a [Source:MGI Symbol;Acc:MGI:1351484]                      |        | 3,600161945 | 2,60081309 | <b>6,06628421</b> | 1,86378312 | 23,5433721 | 1,22129E-06 | 1,9521E-05  | protein_coding    |
| ENSMUSG0000001025  | S100a6        | S100 calcium binding protein A6 (calcylin) [Source:MGI Symbol;Acc:MGI:1339467]                                  |        | 53,85271274 | 2,59174044 | <b>6,02825497</b> | 5,7524923  | 90,30429   | 2,04209E-21 | 1,85425E-19 | protein_coding    |
| ENSMUSG00000006251 | Fabp4         | fatty acid binding protein 4, adipocyte [Source:MGI Symbol;Acc:MGI:88038]                                       |        | 10,37713854 | 2,58280128 | <b>5,99101847</b> | 3,38551155 | 54,831398  | 1,31326E-13 | 4,41247E-12 | protein_coding    |
| ENSMUSG00000034612 | Chst11        | carbohydrate sulfotransferase 11 [Source:MGI Symbol;Acc:MGI:1927166]                                            |        | 10,66213585 | 2,57304092 | <b>5,95062384</b> | 3,42182243 | 107,522168 | 3,42058E-25 | 4,31976E-23 | protein_coding    |
| ENSMUSG00000010200 | S100a4        | S100 calcium binding protein A4 [Source:MGI Symbol;Acc:MGI:1330282]                                             |        | 85,02744293 | 2,57018106 | <b>5,93883956</b> | 6,41042824 | 113,961051 | 1,32893E-26 | 1,9468E-24  | protein_coding    |
| ENSMUSG00000097312 |               |                                                                                                                 |        | 4,569929167 | 2,54652497 | <b>5,84225355</b> | 2,21745554 | 47,5811911 | 5,27724E-12 | 1,40731E-10 | lincRNA           |
| ENSMUSG00000028494 | Plin2         | perilipin 2 [Source:MGI Symbol;Acc:MGI:87920]                                                                   |        | 594,7453472 | 2,54007154 | <b>5,81617848</b> | 9,21628708 | 56,3103385 | 6,18892E-14 | 2,22714E-12 | protein_coding    |
| ENSMUSG00000030605 | Mgef8         | milk fat globule-EGF factor 8 protein [Source:MGI Symbol;Acc:MGI:102768]                                        |        | 59,12977126 | 2,53102005 | <b>5,77980199</b> | 5,88611039 | 37,6150503 | 8,6177E-10  | 1,64665E-08 | protein_coding    |
| ENSMUSG00000026358 | Rgs1          | regulator of G-protein signaling 1 [Source:MGI Symbol;Acc:MGI:1354694]                                          |        | 51,72872123 | 2,53021226 | <b>5,77656666</b> | 5,69559749 | 94,2301661 | 2,80887E-22 | 2,73107E-20 | protein_coding    |
| ENSMUSG00000024087 | Cyp1b1        | cytochrome P450, family 1, subfamily b, polypeptide 1 [Source:MGI Symbol;Acc:MGI:88590]                         |        | 9,536125123 | 2,52427737 | <b>5,75285207</b> | 3,2676218  | 29,6976923 | 5,04949E-08 | 7,08702E-07 | protein_coding    |
| ENSMUSG00000028542 | Slc6a9        | solute carrier family 6 (neurotransmitter transporter, glycine), member 9 [Source:MGI Symbol;Acc:MGI:95760]     |        | 5,68609804  | 2,52246122 | <b>5,74561459</b> | 2,51582386 | 64,1259214 | 1,16716E-15 | 5,43371E-14 | protein_coding    |
| ENSMUSG00000023034 | Nra4a1        | nucleic receptor subfamily 4, group A, member 1 [Source:MGI Symbol;Acc:MGI:1352454]                             |        | 9,806626045 | 2,51927411 | <b>5,73293569</b> | 3,30319868 | 82,5912364 | 1,00930E-19 | 7,19887E-18 | protein_coding    |
| ENSMUSG00000076441 | Ass1          | argininosuccinate synthetase 1 [Source:MGI Symbol;Acc:MGI:88090]                                                |        | 43,49543647 | 2,51661027 | <b>5,72236004</b> | 5,44622894 | 65,1158684 | 7,06211E-16 | 3,36194E-14 | protein_coding    |
| ENSMUSG00000060550 | H2-Q7         | histocompatibility 2, Q region locus 7 [Source:MGI Symbol;Acc:MGI:95936]                                        |        | 24,49624001 | 2,50713312 | <b>5,68489269</b> | 4,61987629 | 208,007997 | 3,73658E-47 | 1,46621E-44 | protein_coding    |
| ENSMUSG00000039911 | Spzb1         | spiA/ryanodine receptor domain and SOCS box containing 1 [Source:MGI Symbol;Acc:MGI:1921896]                    |        | 2,230571499 | 2,50770779 | <b>5,6846751</b>  | 1,17395217 | 22,7432599 | 1,85153E-06 | 1,90475E-05 | protein_coding    |
| ENSMUSG00000022636 | Alcam         | activated leukocyte cell adhesion molecule [Source:MGI Symbol;Acc:MGI:1313266]                                  |        | 82,3041186  | 2,50301147 | <b>5,66867464</b> | 6,36443321 | 85,2252615 | 2,66602E-20 | 2,03414E-18 | protein_coding    |
| ENSMUSG00000029108 | Pcdh7         | protocadherin 7 [Source:MGI Symbol;Acc:MGI:186047]                                                              |        | 24,46243419 | 2,49524474 | <b>5,63823942</b> | 4,61673674 | 97,0419809 | 6,78729E-23 | 6,79727E-21 | protein_coding    |
| ENSMUSG00000027171 | Prrg4         | proline rich Gla (G-carboxyglutamic acid) 4 (transmembrane) [Source:MGI Symbol;Acc:MGI:2442211]                 |        | 3,676565079 | 2,49337792 | <b>5,63094835</b> | 1,89574948 | 31,9769026 | 1,56017E-08 | 2,40078E-07 | protein_coding    |
| ENSMUSG00000032725 | Folr2         | folate receptor 2 (fetal) [Source:MGI Symbol;Acc:MGI:95569]                                                     |        | 64,17780759 | 2,49277731 | <b>5,62860641</b> | 6,00575613 | 80,6937319 | 2,63557E-19 | 1,83272E-17 | protein_coding    |
| ENSMUSG00000070323 | Mmp27         | matrix metalloproteinase 27 [Source:MGI Symbol;Acc:MGI:3039232]                                                 |        | 19,02523755 | 2,47623895 | <b>5,56367809</b> | 4,26017953 | 131,800611 | 1,65427E-30 | 3,36584E-28 | protein_coding    |
| ENSMUSG00000019970 | Sgk1          | serum/glucocorticoid regulated kinase 1 [Source:MGI Symbol;Acc:MGI:1340062]                                     |        | 86,03368469 | 2,46900594 | <b>5,50562344</b> | 6,42803048 | 117,782406 | 1,93492E-27 | 2,99422E-25 | protein_coding    |
| ENSMUSG00000032322 | Cgn11         | cingulin-like 1 [Source:MGI Symbol;Acc:MGI:1915428]                                                             |        | 21,71436346 | 2,45253366 | <b>5,47376563</b> | 4,44331245 | 40,7121542 | 1,76387E-10 | 3,78508E-09 | protein_coding    |
| ENSMUSG00000031565 | Fgfr1         | fibroblast growth factor receptor 1 [Source:MGI Symbol;Acc:MGI:95522]                                           |        | 6,288504374 | 2,45191056 | <b>5,47140199</b> | 2,65200722 | 25,3144851 | 4,87038E-07 | 5,19152E-06 | protein_coding    |
| ENSMUSG00000019122 | Ccl9          | chemokine (C-C motif) ligand 9 [Source:MGI Symbol;Acc:MGI:104533]                                               |        | 289,6960125 | 2,44666175 | <b>5,45153214</b> | 8,17954359 | 146,387929 | 1,06791E-33 | 2,50668E-31 | protein_coding    |
| ENSMUSG00000024912 | Fos11         | fos-like antigen 1 [Source:MGI Symbol;Acc:MGI:107179]                                                           |        | 2,212899991 | 2,44459654 | <b>5,44373387</b> | 1,16356953 | 27,1690234 | 1,86427E-06 | 2,29878E-06 | protein_coding    |
| ENSMUSG00000031520 | Vegfc         | vascular endothelial growth factor C [Source:MGI Symbol;Acc:MGI:109124]                                         |        | 3,410340408 | 2,43702643 | <b>5,41524432</b> | 1,79233341 | 33,2993405 | 7,90094E-09 | 1,27284E-07 | protein_coding    |
| ENSMUSG00000028064 | Sema4a        | sema domain, immunoglobulin domain (Ig), transmembrane domain (TM) and short cytoplasmic domain, (semaphorin) 4 |        | 28,87845227 | 2,43069054 | <b>5,39121161</b> | 4,85899366 | 169,608538 | 9,90087E-39 | 2,67512E-36 | protein_coding    |
| ENSMUSG00000034471 | Caskin2       | CASK-interacting protein 2 [Source:MGI Symbol;Acc:MGI:2157062]                                                  |        | 6,651956545 | 2,42907335 | <b>5,38547463</b> | 2,74375081 | 46,4309685 | 4,40379E-12 | 2,44194E-10 | protein_coding    |
| ENSMUSG00000043822 | Adamts15      | ADAMTS-like 5 [Source:MGI Symbol;Acc:MGI:1913798]                                                               |        | 22,02719701 | 2,42718354 | <b>5,37842417</b> | 4,46221867 | 88,7502843 | 4,47933E-21 | 3,9689E-19  | protein_coding    |
| ENSMUSG00000022408 | Fam83f        | family with sequence similarity 83, member F [Source:MGI Symbol;Acc:MGI:2146227]                                |        | 5,760920692 | 2,42478607 | <b>5,36949373</b> | 2,53115665 | 56,127587  | 6,79177E-14 | 2,39171E-12 | protein_coding    |
| ENSMUSG00000092534 | Gm20418       | predicted gene 20418 [Source:MGI Symbol;Acc:MGI:5141883]                                                        |        | 4,903893915 | 2,4230202  | <b>5,36292547</b> | 2,32191285 | 22,9138558 | 1,69426E-06 | 1,75446E-05 | protein_coding    |
| ENSMUSG00000029082 | Bst1          | bone marrow stromal cell antigen 1 [Source:MGI Symbol;Acc:MGI:105370]                                           |        | 15,3933369  | 2,41920307 | <b>5,3480875</b>  | 3,96288224 | 108,510056 | 2,07793E-25 | 2,75063E-23 | protein_coding    |
| ENSMUSG00000011148 | Adssl1        | adenylosuccinate synthetase like 1 [Source:MGI Symbol;Acc:MGI:87947]                                            |        | 22,01101377 | 2,40878398 | <b>5,31026546</b> | 4,46141128 | 107,191681 | 4,0413E-25  | 5,04565E-23 | protein_coding    |
| ENSMUSG00000031355 | Arhgap6       | Rho GTPase activating protein 6 [Source:MGI Symbol;Acc:MGI:1196332]                                             |        | 6,047353002 | 2,40806224 | <b>5,30760952</b> | 2,60714301 | 52,6791831 | 3,92732E-13 | 1,22933E-11 | protein_coding    |
| ENSMUSG00000042842 | Serpinb6b     | serine (or cysteine) peptidase inhibitor, clade B, member 6b [Source:MGI Symbol;Acc:MGI:894688]                 |        | 9,641124829 | 2,4060028  | <b>5,30003836</b> | 3,28011456 | 63,1167876 | 1,94807E-15 | 8,80799E-14 | protein_coding    |
| ENSMUSG00000036362 | P2ry13        | purinergic receptor P2Y, G-protein coupled 13 [Source:MGI Symbol;Acc:MGI:1921441]                               |        | 1,845784039 | 2,40322803 | <b>5,28985445</b> | 0,90982873 | 26,624843  | 2,47047E-07 | 2,96603E-06 | protein_coding    |
| ENSMUSG00000024659 | Anxa1         | annexin A1 [Source:MGI Symbol;Acc:MGI:96819]                                                                    |        | 440,9442673 | 2,39830558 | <b>5,27183634</b> | 8,78464906 | 79,6702709 | 4,42408E-19 | 3,01997E-17 | protein_coding    |
| ENSMUSG00000031146 | Pip2          | proteolipid protein 2 [Source:MGI Symbol;Acc:MGI:1298382]                                                       |        | 75,64024748 | 2,39109998 | <b>5,24557156</b> | 6,2429848  | 92,11024   | 8,19801E-22 | 7,56903E-20 | protein_coding    |
| ENSMUSG00000021614 | Vcan          | versican [Source:MGI Symbol;Acc:MGI:102889]                                                                     |        | 6,697141547 | 2,36214423 | <b>5,14133932</b> | 2,77466616 | 39,3302101 | 3,57862E-10 | 7,3492E-09  | protein_coding    |
| ENSMUSG00000043939 | A530064D06Rik | RIKEN cDNA A530064D06 gene [Source:MGI Symbol;Acc:MGI:2443476]                                                  |        | 15,60499668 | 2,35657251 | <b>5,12152165</b> | 3,97632583 | 54,1239178 | 1,88236E-13 | 6,22936E-12 | protein_coding    |
| ENSMUSG00000026271 | Gpr35         | G protein-coupled receptor 35 [Source:MGI Symbol;Acc:MGI:1929509]                                               |        | 1,661916998 | 2,33895059 | <b>5,05934449</b> | 0,74507431 | 23,7840364 | 1,07737E-06 | 1,16202E-05 | protein_coding    |
| ENSMUSG00000004267 | Eno2          | enolase 2, gamma neuronal [Source:MGI Symbol;Acc:MGI:95394]                                                     |        | 7,635576894 | 2,32852548 | <b>5,02291717</b> | 2,94709062 | 57,709651  | 3,03809E-14 | 1,12421E-12 | protein_coding    |
| ENSMUSG00000028019 | Pdgfr         | platelet-derived growth factor, C polypeptide [Source:MGI Symbol;Acc:MGI:1859631]                               |        | 10,09167114 | 2,32513374 | <b>5,01122229</b> | 3,34656319 | 47,3676702 | 5,88453E-12 | 1,56167E-10 | protein_coding    |
| ENSMUSG00000028121 | Bcar3         | breast cancer anti-estrogen resistance 3 [Source:MGI Symbol;Acc:MGI:1352501]                                    |        | 6,918009367 | 2,32084866 | <b>4,99626035</b> | 2,80122094 | 47,0800288 | 6,81465E-12 | 1,79551E-10 | protein_coding    |
| ENSMUSG00000026012 | Cd28          | CD28 antigen [Source:MGI Symbol;Acc:MGI:88327]                                                                  |        | 17,45689663 | 2,32036641 | <b>4,99459053</b> | 4,12684603 | 105,83819  | 8,00087E-25 | 9,76728E-23 | protein_coding    |
| ENSMUSG00000026796 | Fam129b       | family with sequence similarity 129, member B [Source:MGI Symbol;Acc:MGI:2442910]                               |        | 327,1522362 | 2,31204413 | <b>4,96586186</b> | 8,35400818 | 87,6493807 | 7,8149E-21  | 6,4074E-19  | protein_coding    |
| ENSMUSG00000030144 | Clec4d        | C-type lectin domain family 4, member d [Source:MGI Symbol;Acc:MGI:1298389]                                     |        | 306,1582303 | 2,29946596 | <b>4,9275505</b>  | 8,25891845 | 76,7530375 | 1,21629E-16 | 2,16292E-16 | protein_coding    |
| ENSMUSG00000069833 | Ahnak         | AHNAK nucleoprotein (desmoyokin) [Source:MGI Symbol;Acc:MGI:1316648]                                            |        | 557,4277867 | 2,29025626 | <b>4,89142988</b> | 9,12296641 | 103,502389 | 2,6008E-24  | 2,91582E-22 | protein_coding    |
| ENSMUSG00000019929 | Dcn           | decorin [Source:MGI Symbol;Acc:MGI:94872]                                                                       |        | 4,214026072 | 2,28276964 | <b>4,8661124</b>  | 2,10264022 | 36,6803014 | 1,39179E-09 | 2,5657E-08  | protein_coding    |
| ENSMUSG00000038776 | Ephx1         | epoxide hydrolase 1, microsomal [Source:MGI Symbol;Acc:MGI:95405]                                               |        | 20,23944243 | 2,27843464 | <b>4,85151265</b> | 4,34574159 | 64,7040759 | 8,70346E-19 | 4,12177E-14 | protein_coding    |
| ENSMUSG00000090307 | 1700071M16Rik | RIKEN cDNA 1700071M16 gene [Source:MGI Symbol;Acc:MGI:1920754]                                                  |        | 4,32374868  | 2,27722395 | <b>4,84912334</b> | 2,13886282 | 35,4287588 | 2,64552E-09 | 4,62839E-08 | antisense         |
| ENSMUSG00000031438 | Rnf128        | ring finger protein 128 [Source:MGI Symbol;Acc:MGI:1914139]                                                     |        | 150,3794259 | 2,27425813 | <b>4,83748817</b> | 7,2331836  | 61,1684669 | 5,2394E-15  | 2,17228E-13 | protein_coding    |
| ENSMUSG00000035473 | Galm          | galactose mutarotase [Source:MGI Symbol;Acc:MGI:2442420]                                                        |        | 11,10628145 | 2,26714127 | <b>4,81368346</b> | 3,48529503 | 55,4671938 | 9,50318E-14 | 3,29374E-12 | protein_coding    |
| ENSMUSG00000078486 |               |                                                                                                                 |        |             |            |                   |            |            |             |             |                   |

|                     |               |                                                                                                                    |        |             |            |                   |            |            |              |             |                      |
|---------------------|---------------|--------------------------------------------------------------------------------------------------------------------|--------|-------------|------------|-------------------|------------|------------|--------------|-------------|----------------------|
| ENSMUSG000000031266 | Gla           | galactosidase, alpha [Source:MGJ Symbol;Acc:MGJ:1347344]                                                           | Sheet1 | 133,5161877 | 2,2352944  | <b>4,70858769</b> | 7,06183623 | 83,3390964 | 6,9119E-20   | 5,09671E-18 | protein_coding       |
| ENSMUSG00000025372  | Baiap2        | brain-specific angiogenesis inhibitor 1-associated protein 2 [Source:MGJ Symbol;Acc:MGJ:2137336]                   |        | 27,77605844 | 2,2297771  | <b>4,69061504</b> | 4,7968476  | 97,2934368 | 5,97781E-23  | 6,08132E-21 | protein_coding       |
| ENSMUSG00000023951  | Vegfa         | vascular endothelial growth factor A [Source:MGJ Symbol;Acc:MGJ:103178]                                            |        | 30,6366616  | 2,22518543 | <b>4,67507993</b> | 4,94187404 | 63,4160983 | 1,67845E-15  | 7,66091E-14 | protein_coding       |
| ENSMUSG00000049409  | Prokr1        | prokinectin receptor 1 [Source:MGJ Symbol;Acc:MGJ:1929676]                                                         |        | 8,428132196 | 2,21996102 | <b>4,58808046</b> | 3,08937551 | 51,0710089 | 8,9043E-13   | 2,64532E-11 | protein_coding       |
| ENSMUSG00000048965  | Mrgpre        | MAS-related GPR, member E [Source:MGJ Symbol;Acc:MGJ:2441884]                                                      |        | 3,064805765 | 2,21785725 | <b>4,65201983</b> | 1,63425578 | 20,6119343 | 5,62444E-06  | 5,19292E-05 | protein_coding       |
| ENSMUSG00000031714  | Gab1          | growth factor receptor bound protein 2-associated protein 1 [Source:MGJ Symbol;Acc:MGJ:108088]                     |        | 9,741295628 | 2,21539814 | <b>4,6440971</b>  | 3,30654216 | 78,2937417 | 8,88028E-19  | 5,87757E-17 | protein_coding       |
| ENSMUSG00000036853  | Mcoln3        | mucopolipin 3 [Source:MGJ Symbol;Acc:MGJ:1890500]                                                                  |        | 3,828925323 | 2,20855572 | <b>4,6221232</b>  | 1,92465197 | 28,8667398 | 7,67364E-08  | 1,03703E-06 | protein_coding       |
| ENSMUSG00000009654  | Oit3          | oncprotein induced transcript 3 [Source:MGJ Symbol;Acc:MGJ:1201782]                                                |        | 6,124003874 | 2,20775002 | <b>4,61954263</b> | 2,61861565 | 30,2326506 | 3,30204E-08  | 5,51081E-07 | protein_coding       |
| ENSMUSG00000021701  | Plk2          | polo-like kinase 2 [Source:MGJ Symbol;Acc:MGJ:1099790]                                                             |        | 152,3163839 | 2,19753966 | <b>4,58696422</b> | 7,25237923 | 78,0488385 | 1,00524E-18  | 6,57416E-17 | protein_coding       |
| ENSMUSG00000093765  | Gm20658       | predicted gene 20658 [Source:MGJ Symbol;Acc:MGJ:5313105]                                                           |        | 4,225566338 | 2,19183967 | <b>4,56887721</b> | 2,10103582 | 23,2763291 | 1,403116E-06 | 1,47386E-05 | processed_transcript |
| ENSMUSG00000037907  | Ankrd13b      | ankryrin repeat domain 13b [Source:MGJ Symbol;Acc:MGJ:2144501]                                                     |        | 9,240393643 | 2,18996423 | <b>4,56294172</b> | 3,20615308 | 44,3618778 | 2,72951E-10  | 6,64947E-10 | protein_coding       |
| ENSMUSG00000031803  | B3gnt3        | UDP-GlcNAc:betaGal beta-1,3-N-acetylglucosaminyltransferase 3 [Source:MGJ Symbol;Acc:MGJ:2152535]                  |        | 7,05274229  | 2,18010677 | <b>4,53187092</b> | 2,82688944 | 41,32795   | 1,28715E-10  | 2,82274E-09 | protein_coding       |
| ENSMUSG00000030789  | Ilgax         | integrin alpha X [Source:MGJ Symbol;Acc:MGJ:96609]                                                                 |        | 9,030434998 | 2,17485692 | <b>4,51540977</b> | 3,18549405 | 37,0436667 | 1,15519E-09  | 2,14793E-08 | protein_coding       |
| ENSMUSG00000021367  | Edn1          | endothelin 1 [Source:MGJ Symbol;Acc:MGJ:95283]                                                                     |        | 4,999687093 | 2,16922521 | <b>4,49781777</b> | 2,36763511 | 35,9831525 | 1,99031E-09  | 3,59073E-08 | protein_coding       |
| ENSMUSG00000032786  | Alas1         | aminolevulinic acid synthase 1 [Source:MGJ Symbol;Acc:MGJ:87989]                                                   |        | 338,8453217 | 2,16857028 | <b>4,49577639</b> | 8,40507901 | 122,195536 | 2,09173E-28  | 3,53566E-26 | protein_coding       |
| ENSMUSG00000036611  | Eepd1         | endonuclease/exonuclease/phosphatase family domain containing 1 [Source:MGJ Symbol;Acc:MGJ:1914734]                |        | 21,3241135  | 2,16270139 | <b>4,4775247</b>  | 4,41933955 | 109,356811 | 1,35551E-25  | 1,83864E-23 | protein_coding       |
| ENSMUSG00000032766  | Gng11         | guanine nucleotide binding protein (G protein), gamma 11 [Source:MGJ Symbol;Acc:MGJ:1913316]                       |        | 5,925904999 | 2,156608   | <b>4,45702175</b> | 2,57023246 | 37,8495192 | 7,64172E-10  | 1,4704E-08  | protein_coding       |
| ENSMUSG00000028949  | Smardc3       | SWI/SNF related, matrix associated, actin dependent regulator of chromatin, subfamily d, member 3 [Source:MGJ Symb |        | 1,513733572 | 2,15605735 | <b>4,45695176</b> | 0,65212971 | 13,0481756 | 0,00030358   | 0,001802937 | protein_coding       |
| ENSMUSG00000043017  | Ptgir         | prostaglandin I receptor (IP) [Source:MGJ Symbol;Acc:MGJ:99535]                                                    |        | 14,93804481 | 2,15031892 | <b>4,43925912</b> | 3,91530192 | 75,7616888 | 3,20051E-18  | 1,91109E-16 | protein_coding       |
| ENSMUSG00000072621  | Sfnf10-ps     | schlafen 10, pseudogene [Source:MGJ Symbol;Acc:MGJ:3512288]                                                        |        | 20,2071341  | 2,145738   | <b>4,42518572</b> | 4,34259417 | 62,3643352 | 2,85446E-15  | 1,25448E-13 | protein_coding       |
| ENSMUSG00000020937  | Pldc3         | phospholipase C, delta 3 [Source:MGJ Symbol;Acc:MGJ:107451]                                                        |        | 1,36211791  | 2,13336327 | <b>4,38670067</b> | 0,45377025 | 17,5706619 | 2,76826E-05  | 0,000216939 | protein_coding       |
| ENSMUSG00000029084  | Cd38          | CD38 antigen [Source:MGJ Symbol;Acc:MGJ:107474]                                                                    |        | 19,26038885 | 2,13221991 | <b>4,38391526</b> | 4,31896804 | 129,663092 | 4,85581E-30  | 9,3598E-28  | protein_coding       |
| ENSMUSG00000052565  | Hist1h1d      | histone cluster 1, H1d [Source:MGJ Symbol;Acc:MGJ:107502]                                                          |        | 1,624349121 | 2,11098308 | <b>4,31985559</b> | 0,7273535  | 19,5175006 | 9,96822E-06  | 8,65094E-05 | protein_coding       |
| ENSMUSG00000045827  | Serpinp9      | serine (or cysteine) peptidase inhibitor, clade B, member 9 [Source:MGJ Symbol;Acc:MGJ:106603]                     |        | 28,47373476 | 2,11079672 | <b>4,31929759</b> | 4,83550455 | 82,3641891 | 1,13186E-19  | 8,02306E-18 | protein_coding       |
| ENSMUSG00000057315  | Arhgap24      | Rho GTPase activating protein 24 [Source:MGJ Symbol;Acc:MGJ:1922647]                                               |        | 5,057775651 | 2,10798087 | <b>4,31087542</b> | 2,34417252 | 38,1810757 | 6,44539E-10  | 1,25116E-08 | protein_coding       |
| ENSMUSG00000055172  | C1ra          | complement component 1, r subcomponent A [Source:MGJ Symbol;Acc:MGJ:1355313]                                       |        | 7,350974806 | 2,10290481 | <b>4,29573444</b> | 2,89436001 | 29,5886335 | 5,34173E-08  | 7,46686E-07 | protein_coding       |
| ENSMUSG00000008540  | Mgst1         | microsomal glutathione S-transferase 1 [Source:MGJ Symbol;Acc:MGJ:1913850]                                         |        | 40,83604364 | 2,09659507 | <b>4,2780403</b>  | 5,35688239 | 60,4307969 | 7,62112E-15  | 3,08979E-13 | protein_coding       |
| ENSMUSG00000026748  | Ptxdc2        | plexin domain containing 2 [Source:MGJ Symbol;Acc:MGJ:1914698]                                                     |        | 3,975340665 | 2,07151406 | <b>4,20327561</b> | 2,02219131 | 35,3895963 | 2,69925E-09  | 4,71489E-08 | protein_coding       |
| ENSMUSG00000031596  | Slc7a2        | solute carrier family 7 (cationic amino acid transporter, y+ system), member 2 [Source:MGJ Symbol;Acc:MGJ:99828]   |        | 2,118557133 | 2,0648771  | <b>4,18398331</b> | 1,12609942 | 13,291838  | 0,000266564  | 0,001611115 | protein_coding       |
| ENSMUSG00000034765  | Dusp5         | dual specificity phosphatase 5 [Source:MGJ Symbol;Acc:MGJ:2685183]                                                 |        | 4,565251862 | 2,0614808  | <b>4,17414523</b> | 2,206062   | 23,8430975 | 1,045116E-06 | 1,30023E-05 | protein_coding       |
| ENSMUSG00000006360  | Crip1         | cysteine-rich protein 1 (intestinal) [Source:MGJ Symbol;Acc:MGJ:88501]                                             |        | 5,886061039 | 2,0610436  | <b>4,17288049</b> | 2,56562997 | 24,7264378 | 6,60716E-07  | 7,39235E-06 | protein_coding       |
| ENSMUSG00000004044  | Ptfr          | polymerase I and transcript release factor [Source:MGJ Symbol;Acc:MGJ:1277968]                                     |        | 5,159115149 | 2,05929746 | <b>4,16783296</b> | 2,38141332 | 17,4430278 | 2,96048E-05  | 0,000229871 | protein_coding       |
| ENSMUSG00000039062  | Anepf         | alanyl (membrane) aminopeptidase [Source:MGJ Symbol;Acc:MGJ:5000466]                                               |        | 197,266586  | 2,05078502 | <b>4,14331361</b> | 7,62430709 | 60,6806523 | 6,71267E-15  | 2,73156E-13 | protein_coding       |
| ENSMUSG00000078485  | Plekhn1       | pleckstrin homology domain containing, family N member 1 [Source:MGJ Symbol;Acc:MGJ:2387630]                       |        | 12,71215799 | 2,05017756 | <b>4,14156939</b> | 3,67456659 | 47,9336758 | 4,40884E-12  | 1,19017E-10 | protein_coding       |
| ENSMUSG00000031391  | L1cam         | L1 cell adhesion molecule [Source:MGJ Symbol;Acc:MGJ:96721]                                                        |        | 8,428851222 | 2,04667271 | <b>4,13152016</b> | 3,08059371 | 38,519611  | 5,42063E-10  | 1,07116E-08 | protein_coding       |
| ENSMUSG00000027955  | Fam198b       | family with sequence similarity 198, member B [Source:MGJ Symbol;Acc:MGJ:1915909]                                  |        | 14,36390303 | 2,04455295 | <b>4,12545416</b> | 3,84704179 | 43,9947551 | 3,29257E-11  | 7,86423E-10 | protein_coding       |
| ENSMUSG00000001930  | Vwf           | Von Willebrand factor homolog [Source:MGJ Symbol;Acc:MGJ:98941]                                                    |        | 24,20299515 | 2,0415022  | <b>4,11673961</b> | 4,59833343 | 88,4249765 | 5,27999E-21  | 4,60407E-19 | protein_coding       |
| ENSMUSG00000024525  | Impa2         | inositol (myo)-1(or 4)-monophosphatase 2 [Source:MGJ Symbol;Acc:MGJ:2149728]                                       |        | 3,039625346 | 2,0369033  | <b>4,10637351</b> | 1,6228644  | 27,6658625 | 1,44185E-07  | 1,82431E-06 | protein_coding       |
| ENSMUSG00000058135  | Gstm1         | glutathione S-transferase, mu 1 [Source:MGJ Symbol;Acc:MGJ:95860]                                                  |        | 91,08221511 | 2,03502916 | <b>4,09831013</b> | 6,51097669 | 59,0749367 | 1,5178E-14   | 5,87186E-13 | protein_coding       |
| ENSMUSG00000024812  | Tjp2          | tight junction protein 2 [Source:MGJ Symbol;Acc:MGJ:1341872]                                                       |        | 11,9735249  | 2,03200667 | <b>4,08973303</b> | 3,58950573 | 69,8467986 | 6,4094E-17   | 3,38558E-15 | protein_coding       |
| ENSMUSG00000029380  | Cxcl1         | chemokine (C-X-C motif) ligand 1 [Source:MGJ Symbol;Acc:MGJ:108068]                                                |        | 6,095300668 | 2,03065801 | <b>4,08591165</b> | 2,64457424 | 46,8231775 | 7,76891E-12  | 2,03231E-10 | protein_coding       |
| ENSMUSG00000033777  | Tlr13         | tol-like receptor 13 [Source:MGJ Symbol;Acc:MGJ:3045213]                                                           |        | 151,643454  | 2,02925108 | <b>4,08192896</b> | 7,24558902 | 79,2410044 | 5,49771E-19  | 3,68313E-17 | protein_coding       |
| ENSMUSG00000019852  | D10Bwg1379e   | DNA segment, Chr 10, Brigham & Women's Genetics 1379 expressed [Source:MGJ Symbol;Acc:MGJ:106387]                  |        | 5,310315658 | 2,02867477 | <b>4,0802987</b>  | 2,41373423 | 30,4362892 | 3,45013E-08  | 5,0274E-07  | protein_coding       |
| ENSMUSG00000043740  | B430306N03Rik | RIKEN cDNA B430306N03 gene [Source:MGJ Symbol;Acc:MGJ:2443478]                                                     |        | 32,95480117 | 2,0245009  | <b>4,06851104</b> | 5,04877602 | 45,9411179 | 1,21861E-11  | 3,085E-10   | protein_coding       |
| ENSMUSG000000037638 | Zbtb42        | zinc finger and BTB domain containing 42 [Source:MGJ Symbol;Acc:MGJ:3644133]                                       |        | 3,514609109 | 2,02227729 | <b>4,0622451</b>  | 1,81252702 | 25,505714  | 4,41075E-07  | 5,08509E-06 | protein_coding       |
| ENSMUSG00000018217  | Pmp22         | peripheral myelin protein 22 [Source:MGJ Symbol;Acc:MGJ:97631]                                                     |        | 108,5531573 | 2,02092842 | <b>4,05844881</b> | 6,76345044 | 59,0970362 | 1,50085E-14  | 5,8268E-13  | protein_coding       |
| ENSMUSG00000010051  | Hyal1         | hyaluronoglycosaminidase 1 [Source:MGJ Symbol;Acc:MGJ:96298]                                                       |        | 5,689389274 | 2,01371231 | <b>4,03819985</b> | 2,51847752 | 27,9328867 | 1,25597E-07  | 1,61964E-06 | protein_coding       |
| ENSMUSG00000073409  | H2-Q6         | histocompatibility 2, Q region locus 6 [Source:MGJ Symbol;Acc:MGJ:95935]                                           |        | 14,38178236 | 2,01047063 | <b>4,02913635</b> | 3,85015928 | 79,6474554 | 4,47546E-19  | 3,01997E-17 | protein_coding       |
| ENSMUSG00000026980  | Ly75          | lymphocyte antigen 75 [Source:MGJ Symbol;Acc:MGJ:106662]                                                           |        | 2,215324467 | 1,99157157 | <b>3,97699957</b> | 1,17926402 | 13,2061375 | 0,000279034  | 0,00167986  | protein_coding       |
| ENSMUSG00000060594  | Layn          | layilin [Source:MGJ Symbol;Acc:MGJ:2685357]                                                                        |        | 10,47516296 | 1,99000678 | <b>3,97238866</b> | 3,40418058 | 51,9545457 | 5,68004E-13  | 1,7432E-11  | protein_coding       |
| ENSMUSG00000041959  | S100a10       | S100 calcium binding protein A10 (calpactin) [Source:MGJ Symbol;Acc:MGJ:1339468]                                   |        | 47,43798581 | 1,98851856 | <b>3,96829302</b> | 5,57201021 | 71,5398174 | 2,71719E-17  | 1,48226E-15 | protein_coding       |
| ENSMUSG00000020092  | Pald1         | phosphatase domain containing, paladin 1 [Source:MGJ Symbol;Acc:MGJ:1351623]                                       |        | 9,161407442 | 1,97306954 | <b>3,92602549</b> | 3,20861458 | 62,0793869 | 3,29887E-15  | 1,42136E-13 | protein_coding       |
| ENSMUSG00000035493  | Tgfbr1        | transforming growth factor, beta induced [Source:MGJ Symbol;Acc:MGJ:99959]                                         |        | 99,23174753 | 1,96966203 | <b>3,91676354</b> | 6,6326766  | 208,789395 | 2,52342E-07  | 1,02684E-44 | protein_coding       |
| ENSMUSG00000039813  | Tbc1d2        | TBC1 domain family, member 2 [Source:MGJ Symbol;Acc:MGJ:2652885]                                                   |        | 7,064528151 | 1,96822179 | <b>3,9128554</b>  | 2,81668821 | 37,0674732 | 1,14111E-09  | 2,12859E-08 | protein_coding       |
| ENSMUSG00000020826  | Nos2          | nitric oxide synthase 2, inducible [Source:MGJ Symbol;Acc:MGJ:97361]                                               |        | 7,947165721 | 1,96678794 | <b>3,90896844</b> | 3,00374913 | 44,2405561 | 2,90402E-11  | 7,02786E-10 | protein_coding       |
| ENSMUSG00000026749  | Nek6          | NIMA (never in mitosis gene a)-related expressed kinase 6 [Source:MGJ Symbol;Acc:MGJ:1891638]                      |        | 28,595093   | 1,96518997 | <b>3,90464115</b> | 4,840522   | 109,497962 | 1,26234E-25  | 1,73367E-23 | protein_coding       |
| ENSMUSG00000072812  | Ahnak2        | AHNAK nucleoprotein 2 [Source:MGJ Symbol;Acc:MGJ:2144831]                                                          |        | 230,1022444 | 1,95786428 | <b>3,88486451</b> | 7,84613379 | 53,1971982 | 3,01689E-13  | 9,66372E-12 | protein_coding       |
| ENSMUSG00000030084  | Plxna1        | plexin A1 [Source:MGJ Symbol;Acc:MGJ:107685]                                                                       |        | 255,7138625 | 1,9517608  | <b>3,86846387</b> | 7,99865949 | 69,0597767 | 9,55238E-17  | 4,97403E-15 | protein_coding       |
| ENSMUSG00000028780  | Sema3c        | sema domain, immunoglobulin domain (Ig), short basic domain, secreted, (semaphorin) 3C [Source:MGJ Symbol;Acc:MG   |        | 2,654177304 | 1,95102484 | <b>3,86649096</b> | 1,44268182 | 16,8582418 | 4,0278E-05   | 0,000301866 | protein_coding       |
| ENSMUSG000000008734 | Gprc5b        | G protein-coupled receptor, family C, group 5, member B [Source:MGJ Symbol;Acc:MGJ:1927596]                        |        | 5,665382164 | 1,94555287 | <b>3,85185361</b> | 2,50430385 | 20,3938605 | 6,60317E-06  | 5,74713E-05 | protein_coding       |
| ENSMUSG00000038963  | Slc04a1       | solute carrier organic anion transporter family, member 4a1 [Source:MGJ Symbol;Acc:MGJ:1351866]                    |        | 98,63270409 | 1,94367784 | <b>3,84685069</b> | 6,6227927  | 176,87993  | 3,22643E-40  | 7,9766E-38  | protein_coding       |
| ENSMUSG00000046768  | Rhoj          | ras homolog gene family, member J [Source:MGJ Symbol;Acc:MGJ:1931551]                                              |        | 5,63979885  | 1,94172187 | <b>3,8163879</b>  | 2,50346396 | 21,964213  | 2,77822E-06  | 2,74302E-05 | protein_coding       |
| ENSMUSG00000045110  | Rassf8        | Ras association (RalGDS/AF-6) domain family (N-terminal) member 8 [Source:MGJ Symbol;Acc:MGJ:1918573]              |        | 2,486812851 | 1,94095516 | <b>3,8395977</b>  | 1,30493779 | 14,9449926 | 0,000110691  | 0,000745406 | protein_coding       |
| ENSMUSG00000025429  | Pstpip2       | proline-serine-threonine phosphatase-interacting protein 2 [Source:MGJ Symbol;Acc:MGJ:1335088]                     |        | 17,54215221 | 1,94054626 | <b>3,835096</b>   | 4,14658179 | 108,598408 | 1,98734E-25  | 2,6628E-23  | protein_coding       |
| ENSMUSG00000028927  | Padi2         | peptidyl arginine deiminase, type II [Source:MGJ Symbol;Acc:MGJ:1338892]                                           |        | 4,860279534 | 1,94017784 | <b>3,83752949</b> | 2,28749154 | 32,4937664 | 1,19575E-08  | 1,87915E-07 |                      |

|                     |          |                                                                                                                 |        |             |            |                   |             |             |              |             |                |
|---------------------|----------|-----------------------------------------------------------------------------------------------------------------|--------|-------------|------------|-------------------|-------------|-------------|--------------|-------------|----------------|
| ENSMUSG00000027533  | Fabp5    | fatty acid binding protein 5, epidermal [Source:MGI Symbol;Acc:MGI:101790]                                      | Sheet1 | 239,4400251 | 1,8975681  | <b>3,72584615</b> | 7,90414229  | 89,1393211  | 3,67964E-21  | 3,28685E-19 | protein_coding |
| ENSMUSG00000049130  | C5ar1    | complement component 5a receptor 1 [Source:MGI Symbol;Acc:MGI:88232]                                            |        | 241,5228224 | 1,89656715 | <b>3,72326203</b> | 7,917776496 | 104,7441448 | 1,3897E-24   | 1,64179E-22 | protein_coding |
| ENSMUSG00000055413  | H2-Q5    | histocompatibility 2, Q region locus 5 [Source:MGI Symbol;Acc:MGI:95934]                                        |        | 5,148759874 | 1,89160486 | <b>3,7104775</b>  | 2,36867686  | 31,0273079  | 2,54424E-08  | 3,7124E-07  | pseudogene     |
| ENSMUSG0000000058   | Cav2     | caveolin 2 [Source:MGI Symbol;Acc:MGI:107571]                                                                   |        | 46,89944247 | 1,89672559 | <b>3,70564734</b> | 5,55368921  | 57,3935393  | 3,56777E-14  | 1,37154E-12 | protein_coding |
| ENSMUSG000000043421 | Hilpd4   | hypoxia inducible lipid droplet associated [Source:MGI Symbol;Acc:MGI:1916823]                                  |        | 15,78574711 | 1,88954507 | <b>3,7051837</b>  | 3,988042    | 35,3351958  | 2,7757E-09   | 4,82542E-08 | protein_coding |
| ENSMUSG00000048537  | Plhd1b   | pleckstrin homology-like domain, family B, member 1 [Source:MGI Symbol;Acc:MGI:2143230]                         |        | 11,63776659 | 1,87916142 | <b>3,67861175</b> | 3,55424053  | 59,992857   | 9,52023E-15  | 3,81747E-13 | protein_coding |
| ENSMUSG00000026837  | Col5a1   | collagen, type V, alpha 1 [Source:MGI Symbol;Acc:MGI:88457]                                                     |        | 4,429082912 | 1,87800096 | <b>3,67565399</b> | 2,17389917  | 10,257909   | 0,001360999  | 0,006696503 | protein_coding |
| ENSMUSG00000030256  | Bhlhe41  | basic helix-loop-helix family, member e41 [Source:MGI Symbol;Acc:MGI:1930704]                                   |        | 72,90618952 | 1,87356533 | <b>3,66460151</b> | 6,1897811   | 83,9440558  | 5,08976E-20  | 3,77846E-18 | protein_coding |
| ENSMUSG00000028124  | G6m9     | glutamate-cysteine ligase, modifier subunit [Source:MGI Symbol;Acc:MGI:104995]                                  |        | 211,0971202 | 1,86956605 | <b>3,65422648</b> | 7,72271337  | 46,6548605  | 8,46567E-12  | 2,04048E-10 | protein_coding |
| ENSMUSG00000028691  | Prdx1    | peroxiredoxin 1 [Source:MGI Symbol;Acc:MGI:99523]                                                               |        | 2395,16309  | 1,86849417 | <b>3,65151249</b> | 11,22597030 | 39,8643605  | 2,72225E-10  | 5,7079E-09  | protein_coding |
| ENSMUSG00000040624  | Plekhh1  | pleckstrin homology domain containing, family G (with RhoGef domain) member 1 [Source:MGI Symbol;Acc:MGI:26765] |        | 10,7954203  | 1,86763847 | <b>3,64934733</b> | 3,44602148  | 51,5917867  | 6,83268E-13  | 2,07378E-11 | protein_coding |
| ENSMUSG00000094114  |          | Transmembrane protein C5orf28 homolog [Source:UniProtKB/Swiss-Prot;Acc:Q8VDR5]                                  |        | 5,043355579 | 1,86483731 | <b>3,64226858</b> | 2,35938731  | 36,8279818  | 1,29025E-09  | 2,38252E-08 | protein_coding |
| ENSMUSG00000022505  | Emp2     | epithelial membrane protein 2 [Source:MGI Symbol;Acc:MGI:1098726]                                               |        | 14,16390225 | 1,86457186 | <b>3,64159847</b> | 3,83834248  | 47,5155727  | 5,45687E-12  | 1,45169E-10 | protein_coding |
| ENSMUSG00000031838  | Ifi30    | interferon gamma inducible protein 30 [Source:MGI Symbol;Acc:MGI:2137648]                                       |        | 51,51004396 | 1,86332612 | <b>3,63845538</b> | 5,69243278  | 80,548717   | 2,83626E-19  | 1,95987E-17 | protein_coding |
| ENSMUSG00000005413  | Hmox1    | heme oxygenase (decycling) 1 [Source:MGI Symbol;Acc:MGI:96163]                                                  |        | 973,4158477 | 1,85550379 | <b>3,61878098</b> | 9,92709604  | 35,5877252  | 2,43819E-09  | 4,31375E-08 | protein_coding |
| ENSMUSG00000026880  | Stom     | stomatin [Source:MGI Symbol;Acc:MGI:95403]                                                                      |        | 122,6978969 | 1,8484998  | <b>3,6102551</b>  | 6,94091421  | 104,485897  | 1,58316E-24  | 1,83097E-22 | protein_coding |
| ENSMUSG000000017390 | Aldoc    | aldolase C, fructose-bisphosphate [Source:MGI Symbol;Acc:MGI:101863]                                            |        | 4,59197091  | 1,84583893 | <b>3,59461917</b> | 2,21351207  | 32,1737272  | 1,40984E-08  | 2,19094E-07 | protein_coding |
| ENSMUSG00000025757  | Hspa4l   | heat shock protein 4 like [Source:MGI Symbol;Acc:MGI:107422]                                                    |        | 30,96414595 | 1,84453373 | <b>3,59136858</b> | 4,96148369  | 75,7628391  | 3,19865E-18  | 1,91109E-16 | protein_coding |
| ENSMUSG00000025586  | Cpeb1    | cytoplasmic polyadenylation element binding protein 1 [Source:MGI Symbol;Acc:MGI:108442]                        |        | 8,838287569 | 1,83938789 | <b>3,57858164</b> | 3,1462858   | 32,136199   | 1,43734E-08  | 2,2237E-07  | protein_coding |
| ENSMUSG000000053040 | Aph1c    | anterior pharynx defective 1c homolog (C. elegans) [Source:MGI Symbol;Acc:MGI:1915568]                          |        | 46,10540502 | 1,83921771 | <b>3,57815952</b> | 5,52895613  | 55,2610709  | 1,05538E-13  | 6,32495E-12 | protein_coding |
| ENSMUSG00000029759  | Pon3     | paraoxonase 3 [Source:MGI Symbol;Acc:MGI:106686]                                                                |        | 28,56684444 | 1,83188001 | <b>3,56000684</b> | 4,84237934  | 53,0021345  | 3,33186E-13  | 1,06416E-11 | protein_coding |
| ENSMUSG000000073910 | Mob3b    | MOB kinase activator 3B [Source:MGI Symbol;Acc:MGI:2664539]                                                     |        | 2,521927105 | 1,83044013 | <b>3,55645554</b> | 1,3524427   | 19,9165658  | 8,08963E-06  | 7,18519E-05 | protein_coding |
| ENSMUSG00000041695  | Kcnj2    | potassium inwardly-rectifying channel, subfamily J, member 2 [Source:MGI Symbol;Acc:MGI:104744]                 |        | 37,070892   | 1,82958282 | <b>3,55434276</b> | 5,21459276  | 70,0576144  | 5,75974E-17  | 3,05711E-15 | protein_coding |
| ENSMUSG000000034168 | Ifi2bp1  | interferon regulatory factor 2 binding protein-like [Source:MGI Symbol;Acc:MGI:2442463]                         |        | 53,3557618  | 1,82428045 | <b>3,54130339</b> | 5,74138051  | 111,39838   | 4,99389E-26  | 6,81741E-24 | protein_coding |
| ENSMUSG000000044103 | Il1f9    | interleukin 1 family, member 9 [Source:MGI Symbol;Acc:MGI:2449929]                                              |        | 4,291901095 | 1,82387108 | <b>3,54029867</b> | 2,11645632  | 22,6034043  | 1,93131E-06  | 2,02955E-05 | protein_coding |
| ENSMUSG00000048807  | Slc35e4  | solute carrier family 35, member E4 [Source:MGI Symbol;Acc:MGI:2144150]                                         |        | 29,45025947 | 1,82122712 | <b>3,53381649</b> | 4,88673417  | 87,1834799  | 9,98065E-21  | 8,04952E-19 | protein_coding |
| ENSMUSG00000018752  | BC096441 | cDNA sequence BC096441 [Source:MGI Symbol;Acc:MGI:3845075]                                                      |        | 3,466441531 | 1,81757176 | <b>3,52487417</b> | 1,81495381  | 16,2584615  | 5,52622E-05  | 0,000403433 | protein_coding |
| ENSMUSG00000048120  | Entpd1   | ectonucleoside triphosphate diphosphohydrolase 1 [Source:MGI Symbol;Acc:MGI:102805]                             |        | 25,2743394  | 1,81695379 | <b>3,52336465</b> | 4,67756521  | 105,667993  | 8,71843E-25  | 1,05263E-22 | protein_coding |
| ENSMUSG00000021483  | Cdk20    | cyclin-dependent kinase 20 [Source:MGI Symbol;Acc:MGI:2145349]                                                  |        | 19,80812061 | 1,81551964 | <b>3,51986388</b> | 4,30819289  | 85,4005491  | 2,43653E-20  | 1,87204E-18 | protein_coding |
| ENSMUSG000000033863 | Klf9     | Kruppel-like factor 9 [Source:MGI Symbol;Acc:MGI:1333856]                                                       |        | 5,966937791 | 1,80629024 | <b>3,49741801</b> | 2,5924263   | 37,5984713  | 8,69126E-10  | 1,65495E-08 | protein_coding |
| ENSMUSG00000005957  | Insl6    | insulin-like 6 [Source:MGI Symbol;Acc:MGI:1351595]                                                              |        | 4,147722252 | 1,80211527 | <b>3,48731157</b> | 2,06122686  | 20,7098183  | 5,34413E-06  | 4,95493E-05 | protein_coding |
| ENSMUSG000000069515 | Lyz1     | lysozyme 1 [Source:MGI Symbol;Acc:MGI:96902]                                                                    |        | 3,628607283 | 1,79518993 | <b>3,47061162</b> | 1,88156781  | 25,2441714  | 5,0512E-07   | 5,78099E-06 | protein_coding |
| ENSMUSG000000032691 | Nlr3p    | NLR family, pyrin domain containing 3 [Source:MGI Symbol;Acc:MGI:2653833]                                       |        | 15,62235633 | 1,79228265 | <b>3,46493071</b> | 3,99881777  | 69,6788116  | 6,97918E-17  | 3,66891E-15 | protein_coding |
| ENSMUSG00000016382  | Pls3     | plastin 3 (T-isoform) [Source:MGI Symbol;Acc:MGI:104807]                                                        |        | 26,23267654 | 1,79229022 | <b>3,46364295</b> | 4,71823169  | 51,1352405  | 8,62165E-13  | 2,58109E-11 | protein_coding |
| ENSMUSG00000021996  | Esd      | esterase D/formylglutathione hydrolase [Source:MGI Symbol;Acc:MGI:95421]                                        |        | 377,4837656 | 1,79026846 | <b>3,45879248</b> | 8,56087551  | 60,0741069  | 9,13522E-15  | 3,67651E-13 | protein_coding |
| ENSMUSG000000028378 | Ptgr1    | prostaglandin reductase 1 [Source:MGI Symbol;Acc:MGI:1914353]                                                   |        | 35,92896056 | 1,79007938 | <b>3,45833921</b> | 5,17368157  | 63,0583034  | 2,00678E-15  | 9,03625E-14 | protein_coding |
| ENSMUSG00000022951  | Rcan1    | regulator of calcineurin 1 [Source:MGI Symbol;Acc:MGI:1890564]                                                  |        | 51,82424597 | 1,78786714 | <b>3,45304023</b> | 5,70372455  | 144,147638  | 3,29847E-33  | 6,71069E-31 | protein_coding |
| ENSMUSG00000024066  | Xdh      | xanthine dehydrogenase [Source:MGI Symbol;Acc:MGI:98973]                                                        |        | 165,2571599 | 1,78382804 | <b>3,4433863</b>  | 7,36950809  | 58,983288   | 1,59017E-14  | 7,1088E-13  | protein_coding |
| ENSMUSG00000075359  |          | Uncharacterized protein [Source:UniProtKB/TrEMBL;Acc:J3KMH2]                                                    |        | 2,130962515 | 1,77939779 | <b>3,43282852</b> | 1,14673433  | 9,8005766   | 0,001744572  | 0,008373791 | protein_coding |
| ENSMUSG000000089774 | Slc5a3   | solute carrier family 5 (inositol transporters), member 3 [Source:MGI Symbol;Acc:MGI:1858226]                   |        | 15,00096633 | 1,77767264 | <b>3,42872606</b> | 3,91421981  | 48,6451067  | 3,06733E-12  | 8,61911E-11 | protein_coding |
| ENSMUSG000000029915 | Clec5a   | C-type lectin domain family 5, member a [Source:MGI Symbol;Acc:MGI:1345151]                                     |        | 8,488567965 | 1,77620542 | <b>3,42524081</b> | 3,0943856   | 34,803281   | 6,64749E-09  | 6,22283E-08 | protein_coding |
| ENSMUSG00000029371  | Cxcl5    | chemokine (C-X-C motif) ligand 5 [Source:MGI Symbol;Acc:MGI:1096868]                                            |        | 7,728180414 | 1,7757749  | <b>3,42421883</b> | 2,99750303  | 38,3785648  | 5,82689E-10  | 1,13915E-08 | protein_coding |
| ENSMUSG00000026656  | Fcgr2b   | Fc receptor, IgG, low affinity IIb [Source:MGI Symbol;Acc:MGI:95499]                                            |        | 16,69103267 | 1,77512547 | <b>3,42267775</b> | 4,07757092  | 83,2198497  | 7,34168E-20  | 5,37754E-18 | protein_coding |
| ENSMUSG00000003363  | Plid3    | phospholipase D family, member 3 [Source:MGI Symbol;Acc:MGI:1333782]                                            |        | 310,5752413 | 1,7716961  | <b>3,41455152</b> | 8,27911953  | 59,7228235  | 1,09203E-14  | 4,33145E-13 | protein_coding |
| ENSMUSG00000020099  | Cunc5b   | unc-5 homolog B (C. elegans) [Source:MGI Symbol;Acc:MGI:894703]                                                 |        | 7,211170134 | 1,76568715 | <b>3,40035919</b> | 2,86231709  | 25,0744163  | 5,51599E-07  | 6,24785E-06 | protein_coding |
| ENSMUSG00000048445  | Ccdc57   | coiled-coil domain containing 57 [Source:MGI Symbol;Acc:MGI:1918526]                                            |        | 3,737535604 | 1,76141231 | <b>3,39029851</b> | 1,92127543  | 22,9069476  | 1,700336E-06 | 1,75912E-05 | protein_coding |
| ENSMUSG00000018800  | Abca5    | ATP-binding cassette, sub-family A (ABC1), member 5 [Source:MGI Symbol;Acc:MGI:2386607]                         |        | 3,889696944 | 1,75304246 | <b>3,37068652</b> | 1,96594163  | 21,1132469  | 4,32925E-06  | 4,11163E-05 | protein_coding |
| ENSMUSG00000011256  | Adam19   | a disintegrin and metalloproteinase domain 19 (meltrin beta) [Source:MGI Symbol;Acc:MGI:1053777]                |        | 3,570130151 | 1,75052627 | <b>3,36481266</b> | 1,8469602   | 21,3418895  | 3,84243E-06  | 3,68506E-05 | protein_coding |
| ENSMUSG00000022534  | Mefv     | Mediterranean fever [Source:MGI Symbol;Acc:MGI:1859396]                                                         |        | 18,226388   | 1,74995329 | <b>3,36347677</b> | 4,20715604  | 104,165996  | 1,86056E-24  | 2,12938E-22 | protein_coding |
| ENSMUSG000000053687 | Dpep2    | dipeptidase 2 [Source:MGI Symbol;Acc:MGI:2442042]                                                               |        | 35,54021038 | 1,74266215 | <b>3,34652118</b> | 5,1577148   | 94,7622931  | 2,14676E-22  | 2,10593E-20 | protein_coding |
| ENSMUSG00000000730  | Dnm13l   | DNA (cytosine-5-)methyltransferase 3-like [Source:MGI Symbol;Acc:MGI:1859287]                                   |        | 2,606983571 | 1,73972709 | <b>3,33971985</b> | 1,40973469  | 11,2877708  | 0,000780193  | 0,004147064 | protein_coding |
| ENSMUSG000000035273 | Hpse     | heparanase [Source:MGI Symbol;Acc:MGI:1343124]                                                                  |        | 22,00120763 | 1,73753278 | <b>3,33464407</b> | 4,46785999  | 54,9534363  | 1,23419E-13  | 4,17234E-12 | protein_coding |
| ENSMUSG000000021280 | Exoc34   | exocyst complex component 3-like 4 [Source:MGI Symbol;Acc:MGI:1921363]                                          |        | 4,791465608 | 1,73424304 | <b>3,32704883</b> | 2,27472529  | 30,1509859  | 3,9684E-08   | 5,71787E-07 | protein_coding |
| ENSMUSG00000026915  | Srtpb    | spermatid perinuclear RNA binding protein [Source:MGI Symbol;Acc:MGI:104626]                                    |        | 2,390125687 | 1,72940862 | <b>3,31591867</b> | 1,28249498  | 18,4116765  | 1,77964E-05  | 0,000146574 | protein_coding |
| ENSMUSG00000029135  | Fosl2    | fos-like antigen 2 [Source:MGI Symbol;Acc:MGI:102858]                                                           |        | 42,13387543 | 1,72897436 | <b>3,3149207</b>  | 5,40498148  | 77,424502   | 1,37894E-18  | 8,80838E-17 | protein_coding |
| ENSMUSG000000059498 | Fcgr3    | Fc receptor, IgG, low affinity III [Source:MGI Symbol;Acc:MGI:95500]                                            |        | 107,5981252 | 1,72845948 | <b>3,31373785</b> | 6,75717292  | 174,678363  | 7,03792E-40  | 2,3432E-37  | protein_coding |
| ENSMUSG00000067719  | Gm10221  | predicted gene 10221 [Source:MGI Symbol;Acc:MGI:3708709]                                                        |        | 10,84251224 | 1,72746452 | <b>3,31145331</b> | 3,46606415  | 13,880511   | 0,000194808  | 0,001226565 | protein_coding |
| ENSMUSG000000042978 | Sbk1     | SH3-binding kinase 1 [Source:MGI Symbol;Acc:MGI:2135937]                                                        |        | 4,03896357  | 1,72241073 | <b>3,29987352</b> | 2,01260928  | 23,1516746  | 1,49713E-06  | 1,56359E-05 | protein_coding |
| ENSMUSG00000042476  | Abcb4    | ATP-binding cassette, sub-family B (MDR/TAP), member 4 [Source:MGI Symbol;Acc:MGI:97569]                        |        | 20,07350696 | 1,7204553  | <b>3,29540389</b> | 4,3319463   | 56,1369112  | 6,75961E-14  | 2,38803E-12 | protein_coding |
| ENSMUSG00000026712  | Mrc1     | mannose receptor, C type 1 [Source:MGI Symbol;Acc:MGI:97142]                                                    |        | 60,79309087 | 1,71831957 | <b>3,29052909</b> | 5,93187745  | 112,736385  | 2,45645E-26  | 3,62494E-24 | protein_coding |
| ENSMUSG00000026042  | Col5a2   | collagen, type V, alpha 2 [Source:MGI Symbol;Acc:MGI:88458]                                                     |        | 7,856560579 | 1,71594563 | <b>3,28431962</b> | 2,99571881  | 11,4786139  | 0,000704016  | 0,003786111 | protein_coding |
| ENSMUSG00000027956  | Tmem144  | transmembrane protein 144 [Source:MGI Symbol;                                                                   |        |             |            |                   |             |             |              |             |                |

|                    |               |                                                                                                                               |        |             |            |                   |            |            |             |              |                |
|--------------------|---------------|-------------------------------------------------------------------------------------------------------------------------------|--------|-------------|------------|-------------------|------------|------------|-------------|--------------|----------------|
| ENSMUSG00000028602 | Tnfrsf8       | tumor necrosis factor receptor superfamily, member 8 [Source:MGI Symbol;Acc:MGI:99908]                                        | Sheet1 | 1,562215092 | 1,68018286 | <b>3,20468568</b> | 0,6594817  | 13,0723423 | 0,000299688 | 0,001786584  | protein_coding |
| ENSMUSG00000056733 | Capg          | capping protein (actin filament), gelsolin-like [Source:MGI Symbol;Acc:MGI:1098259]                                           |        | 551,4059992 | 1,67615405 | <b>3,19574889</b> | 9,10729974 | 42,3109618 | 7,7855E-11  | 1,76007E-09  | protein_coding |
| ENSMUSG00000037411 | Serpine1      | serine (or cysteine) peptidase inhibitor, clade E, member 1 [Source:MGI Symbol;Acc:MGI:97608]                                 |        | 9,453488684 | 1,67499387 | <b>3,19317997</b> | 3,26191769 | 15,8881751 | 6,71973E-05 | 0,000479413  | protein_coding |
| ENSMUSG00000047250 | Ptgs1         | prostaglandin-endoperoxide synthase 1 [Source:MGI Symbol;Acc:MGI:97797]                                                       |        | 13,27683317 | 1,67271562 | <b>3,18814414</b> | 3,73819109 | 51,1134776 | 6,71777E-13 | 2,60277E-11  | protein_coding |
| ENSMUSG00000074874 | Ctla2b        | cytotoxic T lymphocyte-associated protein 2 beta [Source:MGI Symbol;Acc:MGI:88555]                                            |        | 46,456143   | 1,67173901 | <b>3,18598398</b> | 5,53969316 | 76,4572065 | 2,25037E-18 | 1,38903E-16  | protein_coding |
| ENSMUSG00000060214 | Gmb203        | predicted pseudogene 8203 [Source:MGI Symbol;Acc:MGI:3646499]                                                                 |        | 2,708024668 | 1,67022153 | <b>3,1837378</b>  | 1,48818752 | 7,49343382 | 0,006192436 | 0,0024264015 | pseudogene     |
| ENSMUSG00000017057 | Il13ra1       | interleukin 13 receptor, alpha 1 [Source:MGI Symbol;Acc:MGI:105052]                                                           |        | 3,378459294 | 1,67027585 | <b>3,18275443</b> | 1,79787489 | 15,4373012 | 8,52881E-05 | 0,000593828  | protein_coding |
| ENSMUSG00000024900 | Cpt1a         | carnitine palmitoyltransferase 1a, liver [Source:MGI Symbol;Acc:MGI:1098296]                                                  |        | 87,10565445 | 1,66795384 | <b>3,17763594</b> | 6,4467694  | 38,032942  | 6,95602E-10 | 1,3408E-08   | protein_coding |
| ENSMUSG00000002992 | Apoc2         | apolipoprotein C-II [Source:MGI Symbol;Acc:MGI:88054]                                                                         |        | 4,158399306 | 1,66588288 | <b>3,17037776</b> | 2,06337345 | 25,7132337 | 3,96102E-07 | 4,59068E-06  | protein_coding |
| ENSMUSG00000026728 | Vim           | vimentin [Source:MGI Symbol;Acc:MGI:98932]                                                                                    |        | 1111,286416 | 1,6639325  | <b>3,16879098</b> | 10,1181469 | 42,7039586 | 6,36833E-11 | 1,46993E-09  | protein_coding |
| ENSMUSG00000028278 | Rragd         | Ras-related GTP binding D [Source:MGI Symbol;Acc:MGI:1098604]                                                                 |        | 13,88139216 | 1,65803298 | <b>3,15585951</b> | 3,80114497 | 39,6958349 | 2,96758E-10 | 6,17515E-09  | protein_coding |
| ENSMUSG00000019558 | Slc6a8        | solute carrier family 6 (neurotransmitter transporter, creatine), member 8 [Source:MGI Symbol;Acc:MGI:2147834]                |        | 144,8446925 | 1,65773553 | <b>3,1552089</b>  | 7,17896943 | 47,8656    | 4,56461E-12 | 1,22023E-10  | protein_coding |
| ENSMUSG00000015947 | Fcgr1         | Fc receptor, IgG, high affinity I [Source:MGI Symbol;Acc:MGI:95498]                                                           |        | 150,2696856 | 1,65487791 | <b>3,14896541</b> | 7,23482201 | 110,814407 | 6,49778E-26 | 9,03684E-24  | protein_coding |
| ENSMUSG00000037664 | Cdkn1c        | cyclin-dependent kinase inhibitor 1C (P57) [Source:MGI Symbol;Acc:MGI:104564]                                                 |        | 4,851079305 | 1,64781052 | <b>3,13357716</b> | 2,27373125 | 19,1756995 | 1,19221E-05 | 0,000101585  | protein_coding |
| ENSMUSG00000022565 | Plec          | plectin [Source:MGI Symbol;Acc:MGI:1277961]                                                                                   |        | 522,4314524 | 1,64655015 | <b>3,1308408</b>  | 9,02920338 | 54,1365811 | 1,87027E-13 | 6,20805E-12  | protein_coding |
| ENSMUSG00000029994 | Anxa4         | annexin A4 [Source:MGI Symbol;Acc:MGI:88030]                                                                                  |        | 203,5912624 | 1,64643878 | <b>3,13059912</b> | 7,67023014 | 56,2856708 | 6,26705E-14 | 2,24287E-12  | protein_coding |
| ENSMUSG00000027322 | Siglec1       | sialic acid binding Ig-like lectin 1, sialoadhesin [Source:MGI Symbol;Acc:MGI:99668]                                          |        | 127,6979298 | 1,64366542 | <b>3,1245868</b>  | 7,0007799  | 85,8655817 | 1,92592E-20 | 1,49015E-18  | protein_coding |
| ENSMUSG00000054675 | Tmem119       | transmembrane protein 119 [Source:MGI Symbol;Acc:MGI:2385228]                                                                 |        | 5,335848509 | 1,64051542 | <b>3,11777199</b> | 2,43309926 | 23,5226066 | 1,23455E-06 | 1,30674E-05  | protein_coding |
| ENSMUSG00000050737 | Ptges         | prostaglandin E synthase [Source:MGI Symbol;Acc:MGI:1927593]                                                                  |        | 6,825056275 | 1,63728408 | <b>3,11079662</b> | 2,78438339 | 35,6073927 | 2,4137E-09  | 4,28422E-08  | protein_coding |
| ENSMUSG00000044864 | Ankrd50       | ankyrin repeat domain 50 [Source:MGI Symbol;Acc:MGI:2139777]                                                                  |        | 49,8576082  | 1,63628399 | <b>3,10864093</b> | 5,64586871 | 88,1793721 | 5,97801E-21 | 5,17168E-19  | protein_coding |
| ENSMUSG00000026202 | Tuba4a        | tubulin, alpha 4A [Source:MGI Symbol;Acc:MGI:1095410]                                                                         |        | 52,98796295 | 1,63510574 | <b>3,10610315</b> | 5,7314497  | 42,1331185 | 8,52668E-11 | 1,91973E-09  | protein_coding |
| ENSMUSG00000070691 | Runx3         | runt related transcription factor 3 [Source:MGI Symbol;Acc:MGI:102672]                                                        |        | 2,007551671 | 1,63496617 | <b>3,10580268</b> | 1,04642006 | 10,8919595 | 0,000958429 | 0,000101585  | protein_coding |
| ENSMUSG00000058427 | Cxcl2         | chemokine (C-X-C motif) ligand 2 [Source:MGI Symbol;Acc:MGI:1340094]                                                          |        | 56,73235874 | 1,6280082  | <b>3,09085976</b> | 5,84166516 | 118,555291 | 1,3105E-27  | 2,08673E-25  | protein_coding |
| ENSMUSG00000033420 | Antrx1        | anthrax toxin receptor 1 [Source:MGI Symbol;Acc:MGI:1916788]                                                                  |        | 2,858525716 | 1,62665931 | <b>3,08791224</b> | 1,54638977 | 9,2064997  | 0,002411574 | 0,011012452  | protein_coding |
| ENSMUSG00000038235 | F11r          | F11 receptor [Source:MGI Symbol;Acc:MGI:1321398]                                                                              |        | 3,51622626  | 1,62211708 | <b>3,07826424</b> | 1,8206396  | 18,0804689 | 2,11736E-05 | 0,000171454  | protein_coding |
| ENSMUSG00000028076 | Cd1d1         | CD1d1 antigen [Source:MGI Symbol;Acc:MGI:107674]                                                                              |        | 2,873494546 | 1,620623   | <b>3,07507798</b> | 1,53795037 | 12,008377  | 0,00052962  | 0,002955272  | protein_coding |
| ENSMUSG00000040907 | Atp1a3        | ATPase, Na+/K+ transporting, alpha 3 polypeptide [Source:MGI Symbol;Acc:MGI:88107]                                            |        | 95,5064395  | 1,62031928 | <b>3,07443068</b> | 6,57739422 | 65,7387179 | 5,14844E-16 | 2,51404E-14  | protein_coding |
| ENSMUSG00000018927 | Ccl6          | chemokine (C-C motif) ligand 6 [Source:MGI Symbol;Acc:MGI:98263]                                                              |        | 31,62991118 | 1,61995083 | <b>3,07364561</b> | 5,00039651 | 115,157976 | 7,26714E-27 | 1,09375E-24  | protein_coding |
| ENSMUSG00000036103 | Colec12       | collectin sub-family member 12 [Source:MGI Symbol;Acc:MGI:2152907]                                                            |        | 15,61823629 | 1,61978988 | <b>3,07330272</b> | 3,97263009 | 30,663925  | 3,06817E-08 | 4,51271E-07  | protein_coding |
| ENSMUSG00000020234 | 4930404N1Rik  | RIKEN cDNA 4930404N11 gene [Source:MGI Symbol;Acc:MGI:1921072]                                                                |        | 8,060326497 | 1,61068667 | <b>3,05397208</b> | 3,00237638 | 32,6642986 | 1,09531E-08 | 1,73153E-07  | protein_coding |
| ENSMUSG00000037852 | Cpe           | carboxypeptidase E [Source:MGI Symbol;Acc:MGI:101932]                                                                         |        | 3,338569988 | 1,6058583  | <b>3,04376779</b> | 1,76327583 | 7,23657178 | 0,007143325 | 0,027365309  | protein_coding |
| ENSMUSG00000044468 | Fam46c        | family with sequence similarity 46, member C [Source:MGI Symbol;Acc:MGI:1921895]                                              |        | 14,21994648 | 1,60262292 | <b>3,03694949</b> | 3,83623669 | 36,4166114 | 1,59339E-09 | 2,90808E-08  | protein_coding |
| ENSMUSG00000048924 | Cdccl125      | coiled-coil domain containing 125 [Source:MGI Symbol;Acc:MGI:1923291]                                                         |        | 5,768882228 | 1,60191123 | <b>3,03545173</b> | 2,53963491 | 28,684709  | 8,51736E-08 | 1,13178E-06  | protein_coding |
| ENSMUSG00000021846 | Pel12         | pellino 2 [Source:MGI Symbol;Acc:MGI:1891445]                                                                                 |        | 3,587153757 | 1,60051672 | <b>3,03251907</b> | 1,8619679  | 20,101591  | 7,34356E-06 | 6,57033E-05  | protein_coding |
| ENSMUSG00000038147 | Cd84          | CD84 antigen [Source:MGI Symbol;Acc:MGI:1336885]                                                                              |        | 223,5997657 | 1,60004416 | <b>3,03152593</b> | 7,80549016 | 66,0331398 | 4,43045E-16 | 2,19445E-14  | protein_coding |
| ENSMUSG00000075602 | Ly6a          | lymphocyte antigen 6 complex, locus A [Source:MGI Symbol;Acc:MGI:107527]                                                      |        | 5,68432863  | 1,59931864 | <b>3,03000179</b> | 2,51866056 | 18,3818497 | 1,00772E-05 | 0,00014833   | protein_coding |
| ENSMUSG00000018774 | Cd68          | CD68 antigen [Source:MGI Symbol;Acc:MGI:88342]                                                                                |        | 432,6864511 | 1,59591625 | <b>3,02286437</b> | 8,75747773 | 32,7966278 | 1,02375E-08 | 1,62777E-07  | protein_coding |
| ENSMUSG00000031488 | Rab11fp1      | RAB11 family interacting protein 1 (class I) [Source:MGI Symbol;Acc:MGI:1923017]                                              |        | 22,46578284 | 1,59404051 | <b>3,0189367</b>  | 4,50586685 | 74,9212672 | 4,89865E-18 | 2,87815E-16  | protein_coding |
| ENSMUSG00000024186 | Rgs11         | regulator of G-protein signaling 11 [Source:MGI Symbol;Acc:MGI:1354739]                                                       |        | 2,799414823 | 1,59276426 | <b>3,01626724</b> | 1,50313934 | 17,3139846 | 3,16846E-05 | 0,000244222  | protein_coding |
| ENSMUSG00000072825 | AW555464      | expressed sequence AW555464 [Source:MGI Symbol;Acc:MGI:2145043]                                                               |        | 26,23555426 | 1,59011008 | <b>3,01072322</b> | 4,71446802 | 38,3695758 | 5,85379E-10 | 1,14037E-08  | protein_coding |
| ENSMUSG00000037172 | E330009J07Rik | RIKEN cDNA E330009J07 gene [Source:MGI Symbol;Acc:MGI:2444256]                                                                |        | 4,234284124 | 1,59003408 | <b>3,01056462</b> | 2,10054531 | 20,5890263 | 5,29421E-06 | 5,24221E-05  | protein_coding |
| ENSMUSG00000038712 | Fam63a        | family with sequence similarity 63, member A [Source:MGI Symbol;Acc:MGI:1922257]                                              |        | 69,08549576 | 1,58808463 | <b>3,00649932</b> | 6,11285438 | 78,1488508 | 9,55612E-19 | 6,28701E-17  | protein_coding |
| ENSMUSG00000052397 | Ezr           | ezrin [Source:MGI Symbol;Acc:MGI:98931]                                                                                       |        | 22,81512045 | 1,58577303 | <b>3,00168592</b> | 4,51860367 | 43,9270116 | 3,40852E-11 | 8,10594E-10  | protein_coding |
| ENSMUSG00000082691 | Dynl1-ps1     | dynein light chain Tctex-type 1, pseudogene 1 [Source:MGI Symbol;Acc:MGI:3642625]                                             |        | 9,991080553 | 1,5842804  | <b>2,98644271</b> | 1,97523353 | 9,095076   | 0,002562986 | 0,011550256  | pseudogene     |
| ENSMUSG00000032491 | Nradd         | neurotrophin receptor associated death domain [Source:MGI Symbol;Acc:MGI:1914419]                                             |        | 3,196143111 | 1,5748954  | <b>2,97913891</b> | 1,6831417  | 14,6997215 | 0,000126065 | 0,000836399  | protein_coding |
| ENSMUSG00000085295 | 4930430E12Rik | RIKEN cDNA 4930430E12 gene [Source:MGI Symbol;Acc:MGI:1918889]                                                                |        | 11,7789291  | 1,57415155 | <b>2,97603027</b> | 3,56677656 | 45,2845933 | 1,70384E-11 | 4,28378E-10  | antisense      |
| ENSMUSG00000022947 | Cbr3          | carbonyl reductase 3 [Source:MGI Symbol;Acc:MGI:1309992]                                                                      |        | 17,68316824 | 1,5740333  | <b>2,97735923</b> | 4,15558705 | 61,733838  | 3,93165E-15 | 1,66143E-13  | protein_coding |
| ENSMUSG00000032554 | Trf           | transferrin [Source:MGI Symbol;Acc:MGI:98821]                                                                                 |        | 19,7871103  | 1,57384181 | <b>2,97696408</b> | 4,30901272 | 71,4209072 | 2,88598E-17 | 1,56972E-15  | protein_coding |
| ENSMUSG00000001918 | Slc1a5        | solute carrier family 1 (neutral amino acid transporter), member 5 [Source:MGI Symbol;Acc:MGI:105305]                         |        | 17,3091856  | 1,5712408  | <b>2,97160179</b> | 4,11310105 | 79,6544213 | 4,45971E-19 | 3,01997E-17  | protein_coding |
| ENSMUSG00000089672 | Gp49a         | glycoprotein 49 A [Source:MGI Symbol;Acc:MGI:102702]                                                                          |        | 190,5957936 | 1,56833445 | <b>2,96562144</b> | 7,57538127 | 48,423245  | 3,43473E-12 | 9,50563E-11  | protein_coding |
| ENSMUSG00000022122 | Ednrb         | endothelin receptor type B [Source:MGI Symbol;Acc:MGI:102720]                                                                 |        | 10,5574148  | 1,5680041  | <b>2,96502465</b> | 3,43365236 | 36,6142649 | 1,43974E-09 | 2,64081E-08  | protein_coding |
| ENSMUSG00000034758 | Tie6          | transducin-like enhancer of split 6, homolog of Drosophila E(spl) [Source:MGI Symbol;Acc:MGI:2149593]                         |        | 5,613083543 | 1,56791278 | <b>2,96457477</b> | 2,50868096 | 26,6501609 | 2,4383E-07  | 2,9504E-06   | protein_coding |
| ENSMUSG00000028680 | Pik3          | polo-like kinase 3 [Source:MGI Symbol;Acc:MGI:109604]                                                                         |        | 20,33941863 | 1,5650716  | <b>2,95892187</b> | 4,35276014 | 48,5576742 | 3,20717E-12 | 8,98907E-11  | protein_coding |
| ENSMUSG00000027646 | Src           | Rous sarcoma oncogene [Source:MGI Symbol;Acc:MGI:98397]                                                                       |        | 10,06842109 | 1,56483208 | <b>2,95843066</b> | 3,33978848 | 23,8941955 | 1,01778E-06 | 1,10931E-05  | protein_coding |
| ENSMUSG00000022756 | Slc7a4        | solute carrier family 7 (cationic amino acid transporter, y+ system), member 4 [Source:MGI Symbol;Acc:MGI:2146512]            |        | 2,95116496  | 1,56190281 | <b>2,95242992</b> | 1,58085741 | 15,195612  | 9,69284E-05 | 0,000661872  | protein_coding |
| ENSMUSG00000021298 | Gpr132        | G protein-coupled receptor 132 [Source:MGI Symbol;Acc:MGI:1890220]                                                            |        | 8,775017383 | 1,55697213 | <b>2,94235665</b> | 3,13256816 | 43,2765898 | 4,75235E-11 | 1,12288E-09  | protein_coding |
| ENSMUSG00000054342 | Kcnna         | potassium intermediate/small conductance calcium-activated channel, subfamily N, member 4 [Source:MGI Symbol;Acc:MGI:2442338] |        | 80,67446507 | 1,5546554  | <b>2,93763549</b> | 6,33451647 | 60,7167277 | 6,59077E-15 | 2,69193E-13  | protein_coding |
| ENSMUSG00000025880 | Smad7         | SMAD family member 7 [Source:MGI Symbol;Acc:MGI:1100518]                                                                      |        | 2,171523538 | 1,55382658 | <b>2,93594834</b> | 1,17277351 | 13,378717  | 0,000254496 | 0,001549969  | protein_coding |
| ENSMUSG00000038463 | Olfml2b       | olfactomedin-like 2B [Source:MGI Symbol;Acc:MGI:2443310]                                                                      |        | 2,033897464 | 1,55344587 | <b>2,93517368</b> | 1,06950754 | 11,4353762 | 0,000720589 | 0,003867665  | protein_coding |
| ENSMUSG00000074657 | Kif5a         | kinesin family member 5A [Source:MGI Symbol;Acc:MGI:109564]                                                                   |        | 4,437318359 | 1,55177683 | <b>2,93177996</b> | 2,14667159 | 21,9001419 | 2,82713E-06 | 2,83014E-05  | protein_coding |
| ENSMUSG00000056145 | Al504432      | expressed sequence Al504432 [Source:MGI Symbol;Acc:MGI:2139742]                                                               |        | 4,124714333 | 1,54902132 | <b>2,92618569</b> | 2,07640771 | 18,0961331 | 2,10028E-05 | 0,000170301  | protein_coding |
| ENSMUSG00000026875 | Traf1         | TNF receptor-associated factor 1 [Source:MGI Symbol                                                                           |        |             |            |                   |            |            |             |              |                |

|                    |               |                                                                                                                                  |              |            |                   |            |            |             |              |                |
|--------------------|---------------|----------------------------------------------------------------------------------------------------------------------------------|--------------|------------|-------------------|------------|------------|-------------|--------------|----------------|
| ENSMUSG00000025161 | Slc16a3       | solute carrier family 16 (monocarboxylic acid transporters), member 3 [Source:MGI Symbol;Acc:MGI:1003438]                        | 38,73802616  | 1,51942263 | <b>2,86676298</b> | 5,28821147 | 87,9793401 | 6,61417E-21 | 5,58999E-19  | protein_coding |
| ENSMUSG00000015305 | Sash1         | SAM and SH3 domain containing 1 [Source:MGI Symbol;Acc:MGI:1917347]                                                              | 212,8696388  | 1,51318117 | <b>2,85438744</b> | 7,73500495 | 59,878158  | 1,00915E-04 | 4,03184E-13  | protein_coding |
| ENSMUSG00000026249 | Serpine2      | serine (or cysteine) peptidase inhibitor, clade E, member 2 [Source:MGI Symbol;Acc:MGI:101780]                                   | 3,061946519  | 1,50833094 | <b>2,84480732</b> | 1,65696183 | 9,30282856 | 0,002288003 | 0,010513715  | protein_coding |
| ENSMUSG00000021770 | Samd8         | sterile alpha motif domain containing 8 [Source:MGI Symbol;Acc:MGI:1914880]                                                      | 64,89327709  | 1,50783842 | <b>2,8438363</b>  | 6,0223159  | 58,8120921 | 1,73472E-14 | 6,062923E-13 | protein_coding |
| ENSMUSG00000022236 | Rorpl1        | roporin 1-like [Source:MGI Symbol;Acc:MGI:2182357]                                                                               | 2,408917699  | 1,50766372 | <b>2,84349195</b> | 1,27027036 | 14,2910554 | 0,000156607 | 0,001012695  | protein_coding |
| ENSMUSG00000033386 | Frfs1         | ferric-chelate reductase 1 [Source:MGI Symbol;Acc:MGI:108076]                                                                    | 29,43278816  | 1,50676975 | <b>2,84173052</b> | 4,88560851 | 62,0874717 | 3,28535E-15 | 1,42111E-13  | protein_coding |
| ENSMUSG00000003573 | Homer3        | homer homolog 3 (Drosophila) [Source:MGI Symbol;Acc:MGI:1347359]                                                                 | 30,66674086  | 1,5065639  | <b>2,84132508</b> | 4,94265322 | 52,091579  | 5,29716E-13 | 1,63483E-11  | protein_coding |
| ENSMUSG00000062585 | Cnr2          | cannabinoid receptor 2 (macrophage) [Source:MGI Symbol;Acc:MGI:104650]                                                           | 7,3610383056 | 1,50570222 | <b>2,83962855</b> | 2,88163854 | 32,0994165 | 1,46481E-08 | 2,26356E-07  | protein_coding |
| ENSMUSG00000056749 | Nfl3          | nuclear factor, interleukin 3, regulated [Source:MGI Symbol;Acc:MGI:109495]                                                      | 11,54099306  | 1,50341808 | <b>2,83513627</b> | 3,5480163  | 48,938445  | 2,64123E-12 | 7,47916E-11  | protein_coding |
| ENSMUSG00000002289 | Angptl4       | angiopoietin-like 4 [Source:MGI Symbol;Acc:MGI:188999]                                                                           | 1,888841547  | 1,50059978 | <b>2,82963025</b> | 0,96049885 | 6,18752608 | 0,012865932 | 0,044520333  | protein_coding |
| ENSMUSG00000005097 | Creg2         | cellular repressor of E1A-stimulated genes 2 [Source:MGI Symbol;Acc:MGI:1928333]                                                 | 5,316481149  | 1,49772552 | <b>2,82397148</b> | 2,43982325 | 19,7235855 | 8,94901E-06 | 7,87822E-05  | protein_coding |
| ENSMUSG00000040133 | Gpr176        | G protein-coupled receptor 176 [Source:MGI Symbol;Acc:MGI:2685858]                                                               | 3,746478682  | 1,49742083 | <b>2,82337514</b> | 1,93065107 | 11,6259854 | 0,000650368 | 0,003532175  | protein_coding |
| ENSMUSG00000027398 | Il1b          | interleukin 1 beta [Source:MGI Symbol;Acc:MGI:96543]                                                                             | 14,77165668  | 1,49691427 | <b>2,82238397</b> | 3,91541649 | 28,9061002 | 7,59733E-08 | 1,02798E-06  | protein_coding |
| ENSMUSG00000005057 | Sh2b2         | SH2B adaptor protein 2 [Source:MGI Symbol;Acc:MGI:1345171]                                                                       | 20,06366888  | 1,49341007 | <b>2,81553693</b> | 4,32664252 | 56,8771912 | 4,63895E-14 | 1,69329E-12  | protein_coding |
| ENSMUSG00000021575 | Ahrr          | aryl-hydrocarbon receptor repressor [Source:MGI Symbol;Acc:MGI:1333776]                                                          | 23,20493619  | 1,49105224 | <b>2,81093919</b> | 4,5528355  | 82,6830233 | 9,6325E-20  | 6,91714E-18  | protein_coding |
| ENSMUSG00000025492 | Ilfm3         | interferon induced transmembrane protein 3 [Source:MGI Symbol;Acc:MGI:1913391]                                                   | 200,5567245  | 1,48863949 | <b>2,80624213</b> | 7,64941838 | 77,9197631 | 1,07312E-18 | 6,9497E-17   | protein_coding |
| ENSMUSG00000036478 | Btg1          | B cell translocation gene 1, anti-proliferative [Source:MGI Symbol;Acc:MGI:88215]                                                | 93,54190727  | 1,48487448 | <b>2,7989282</b>  | 6,551301   | 125,787473 | 3,42241E-29 | 5,86858E-27  | protein_coding |
| ENSMUSG00000006651 | Aplp1         | amyloid beta (A4) precursor-like protein 1 [Source:MGI Symbol;Acc:MGI:88046]                                                     | 2,7045129    | 1,47869678 | <b>2,78696866</b> | 1,45701577 | 13,6907794 | 0,00021551  | 0,001338501  | protein_coding |
| ENSMUSG00000020250 | Txnrd1        | thioredoxin reductase 1 [Source:MGI Symbol;Acc:MGI:1354175]                                                                      | 311,36362441 | 1,46822499 | <b>2,76685108</b> | 8,2834286  | 51,5638492 | 6,93061E-13 | 2,0977E-11   | protein_coding |
| ENSMUSG00000054484 | Tmem62        | transmembrane protein 62 [Source:MGI Symbol;Acc:MGI:2139461]                                                                     | 10,0808566   | 1,46741407 | <b>2,76525795</b> | 3,35443478 | 34,2028254 | 4,96568E-09 | 8,2789E-08   | protein_coding |
| ENSMUSG00000030745 | Il21r         | interleukin 21 receptor [Source:MGI Symbol;Acc:MGI:1890475]                                                                      | 57,95615914  | 1,4634218  | <b>2,75761644</b> | 5,86218802 | 112,024499 | 3,52922E-26 | 5,03579E-24  | protein_coding |
| ENSMUSG00000005447 | Pafah1b3      | platelet-activating factor acetylhydrolase, isoform 1b, subunit 3 [Source:MGI Symbol;Acc:MGI:108414]                             | 7,918512572  | 1,46298012 | <b>2,75677232</b> | 2,98690485 | 28,591408  | 8,93779E-08 | 1,18313E-06  | protein_coding |
| ENSMUSG00000018920 | Cxcl16        | chemokine (C-X-C motif) ligand 16 [Source:MGI Symbol;Acc:MGI:1932682]                                                            | 133,8441623  | 1,46216881 | <b>2,75522247</b> | 7,06678941 | 77,0519629 | 1,66519E-18 | 1,05754E-16  | protein_coding |
| ENSMUSG00000027848 | Olfml3        | olfactomedin-like 3 [Source:MGI Symbol;Acc:MGI:1914877]                                                                          | 7,992444055  | 1,46189607 | <b>2,75407164</b> | 3,00146919 | 20,1325175 | 7,22577E-06 | 6,48607E-05  | protein_coding |
| ENSMUSG00000034472 | Rasd2         | RASD family, member 2 [Source:MGI Symbol;Acc:MGI:1922391]                                                                        | 3,322717207  | 1,44969034 | <b>2,73149415</b> | 1,73433496 | 13,7415951 | 0,000209757 | 0,001305724  | protein_coding |
| ENSMUSG00000039693 | 7530528L13Rik | RIKEN cDNA 5730528L13 gene [Source:MGI Symbol;Acc:MGI:1913915]                                                                   | 3,120986304  | 1,44558448 | <b>2,72373148</b> | 1,67742581 | 12,6845807 | 0,000368683 | 0,002151207  | protein_coding |
| ENSMUSG00000053318 | Slamf8        | SLAM family member 8 [Source:MGI Symbol;Acc:MGI:1921998]                                                                         | 10,0959864   | 1,44448236 | <b>2,72165152</b> | 3,34516445 | 42,9653447 | 5,57182E-11 | 1,29698E-09  | protein_coding |
| ENSMUSG00000079625 | Tm4sf19       | transmembrane 4 L six family member 19 [Source:MGI Symbol;Acc:MGI:3645933]                                                       | 5,762005848  | 1,44112663 | <b>2,71532829</b> | 2,52318999 | 19,1466739 | 1,21048E-05 | 0,000103018  | protein_coding |
| ENSMUSG00000022901 | Cd86          | CD86 antigen [Source:MGI Symbol;Acc:MGI:101773]                                                                                  | 21,36254281  | 1,44103957 | <b>2,71516442</b> | 4,415332   | 66,9057413 | 2,84804E-16 | 1,4159E-14   | protein_coding |
| ENSMUSG00000033917 | Gde1          | glycerophosphodiester phosphodiesterase 1 [Source:MGI Symbol;Acc:MGI:1891827]                                                    | 56,60198587  | 1,43710193 | <b>2,70776386</b> | 5,82439042 | 64,5497771 | 9,41242E-16 | 4,43838E-14  | protein_coding |
| ENSMUSG00000041268 | Dmx12         | Dmx-like 2 [Source:MGI Symbol;Acc:MGI:2444630]                                                                                   | 112,3508794  | 1,43520058 | <b>2,70419761</b> | 6,81440301 | 84,5209561 | 3,80164E-20 | 2,88059E-18  | protein_coding |
| ENSMUSG00000030259 | Rassf8        | Ras association (RalGDS/AF-6) domain family (N-terminal) member 8 [Source:MGI Symbol;Acc:MGI:1918573]                            | 27,14359303  | 1,42365788 | <b>2,68264821</b> | 4,76533358 | 48,0649903 | 4,12323E-12 | 1,11857E-10  | protein_coding |
| ENSMUSG00000083696 | Gm12563       | predicted gene 12563 [Source:MGI Symbol;Acc:MGI:3652205]                                                                         | 5,480768245  | 1,42272194 | <b>2,68090842</b> | 2,48624534 | 13,9066802 | 0,000192122 | 0,00121104   | pseudogene     |
| ENSMUSG00000040274 | Cdk6          | cyclin-dependent kinase 6 [Source:MGI Symbol;Acc:MGI:1277162]                                                                    | 17,3110174   | 1,4185954  | <b>2,67325118</b> | 4,1166395  | 33,7295288 | 6,3332E-09  | 1,03392E-07  | protein_coding |
| ENSMUSG00000022707 | Gbe1          | glucan (1,4-alpha-), branching enzyme 1 [Source:MGI Symbol;Acc:MGI:1921435]                                                      | 45,24202165  | 1,41772849 | <b>2,67164531</b> | 5,50533425 | 55,7473107 | 8,24109E-14 | 2,86534E-12  | protein_coding |
| ENSMUSG00000023805 | Synj2         | synaptotagmin 2 [Source:MGI Symbol;Acc:MGI:1201671]                                                                              | 24,000393073 | 1,41710629 | <b>2,67049334</b> | 4,59627149 | 54,4919554 | 1,56085E-13 | 5,2125E-12   | protein_coding |
| ENSMUSG00000019806 | Aig1          | androgen-induced 1 [Source:MGI Symbol;Acc:MGI:1913503]                                                                           | 6,120792455  | 1,41445951 | <b>2,66559854</b> | 2,61336692 | 23,6186145 | 1,17446E-06 | 1,25645E-05  | protein_coding |
| ENSMUSG00000035342 | Lzts2         | leucine zipper, putative tumor suppressor 2 [Source:MGI Symbol;Acc:MGI:2385095]                                                  | 4,98637444   | 1,41428836 | <b>2,66582333</b> | 2,32753902 | 14,5900776 | 0,000133262 | 0,000877789  | protein_coding |
| ENSMUSG00000026826 | Nr4a2         | nuclear receptor subfamily 4, group A, member 2 [Source:MGI Symbol;Acc:MGI:1352456]                                              | 3,289963724  | 1,41160677 | <b>2,66033287</b> | 1,72569999 | 16,3304924 | 5,3201E-05  | 0,000389679  | protein_coding |
| ENSMUSG00000032374 | Plod2         | procollagen lysine, 2-oxoglutarate 5-dioxygenase 2 [Source:MGI Symbol;Acc:MGI:1347007]                                           | 2,212001941  | 1,40933925 | <b>2,65652309</b> | 1,17983671 | 7,98505209 | 0,004716514 | 0,019264066  | protein_coding |
| ENSMUSG00000001036 | Epn2          | epsin 2 [Source:MGI Symbol;Acc:MGI:1333766]                                                                                      | 7,596568522  | 1,40742913 | <b>2,65264043</b> | 2,9402739  | 21,3572863 | 3,81169E-06 | 3,66338E-05  | protein_coding |
| ENSMUSG00000055013 | Agap1         | ArfGAP with GTPase domain, ankyrin repeat and PH domain 1 [Source:MGI Symbol;Acc:MGI:2653690]                                    | 12,37448981  | 1,40325391 | <b>2,64497467</b> | 3,6303463  | 29,5968701 | 5,31908E-08 | 7,44467E-07  | protein_coding |
| ENSMUSG00000035640 | Dos           | downstream of Stk11 [Source:MGI Symbol;Acc:MGI:1354170]                                                                          | 1,856324457  | 1,40318431 | <b>2,64484707</b> | 0,89332622 | 10,8552906 | 0,000985139 | 0,005074413  | protein_coding |
| ENSMUSG00000014786 | Slc9a5        | solute carrier family 9 (sodium/hydrogen exchanger), member 5 [Source:MGI Symbol;Acc:MGI:2685542]                                | 2,523807415  | 1,40288417 | <b>2,64429689</b> | 1,35954251 | 10,6158918 | 0,001121199 | 0,005658607  | protein_coding |
| ENSMUSG00000031647 | Mfap3l        | microfibrillar-associated protein 3-like [Source:MGI Symbol;Acc:MGI:1918556]                                                     | 26,80120617  | 1,40137905 | <b>2,64153963</b> | 4,74915428 | 33,7916722 | 6,13409E-09 | 1,0059E-07   | protein_coding |
| ENSMUSG00000039153 | Runx2         | runt related transcription factor 2 [Source:MGI Symbol;Acc:MGI:99829]                                                            | 5,064722269  | 1,40003766 | <b>2,63980472</b> | 2,36174785 | 19,0189455 | 1,29427E-05 | 0,000109723  | protein_coding |
| ENSMUSG00000073492 | Gm10521       | predicted gene 10521 [Source:MGI Symbol;Acc:MGI:3642358]                                                                         | 12,49939144  | 1,39988101 | <b>2,63879818</b> | 3,64494746 | 38,6888727 | 4,97034E-10 | 9,92894E-09  | protein_coding |
| ENSMUSG00000038894 | Irs2          | insulin receptor substrate 2 [Source:MGI Symbol;Acc:MGI:109334]                                                                  | 4,894620536  | 1,397606   | <b>2,63464029</b> | 2,2936189  | 20,0724815 | 7,45618E-06 | 6,66025E-05  | protein_coding |
| ENSMUSG00000033721 | Vav3          | vav 3 oncogene [Source:MGI Symbol;Acc:MGI:1888518]                                                                               | 44,91707469  | 1,39457074 | <b>2,62910313</b> | 5,49303189 | 55,0298261 | 1,18715E-13 | 4,06329E-12  | protein_coding |
| ENSMUSG00000007783 | Cpt1c         | carmitine palmitoyltransferase 1c [Source:MGI Symbol;Acc:MGI:2446526]                                                            | 1,605841008  | 1,39417037 | <b>2,62837363</b> | 0,73225737 | 6,56682204 | 0,010389731 | 0,037528406  | protein_coding |
| ENSMUSG00000010095 | Slc32a2       | solute carrier family 3 (activators of dibasic and neutral amino acid transport), member 2 [Source:MGI Symbol;Acc:MGI:288706407] | 288,7060407  | 1,39240117 | <b>2,62515239</b> | 8,17413638 | 62,434832  | 2,75409E-15 | 1,22013E-13  | protein_coding |
| ENSMUSG00000022126 | Irg1          | immunoresponsive gene 1 [Source:MGI Symbol;Acc:MGI:103206]                                                                       | 238,9728411  | 1,38773543 | <b>2,61667624</b> | 7,90512354 | 92,7138486 | 6,04292E-22 | 5,72359E-20  | protein_coding |
| ENSMUSG00000024621 | Csf1r         | colony stimulating factor 1 receptor [Source:MGI Symbol;Acc:MGI:1339758]                                                         | 66,61305553  | 1,38724722 | <b>2,61579091</b> | 9,37666368 | 53,2513672 | 2,93483E-13 | 9,42836E-12  | protein_coding |
| ENSMUSG00000040219 | Ttc12         | tetratricopeptide repeat domain 12 [Source:MGI Symbol;Acc:MGI:2444588]                                                           | 13,92138705  | 1,38622376 | <b>2,61393589</b> | 3,81136221 | 29,000519  | 7,23589E-08 | 9,8392E-07   | protein_coding |
| ENSMUSG00000002233 | Rhoc          | ras homolog gene family, member C [Source:MGI Symbol;Acc:MGI:106028]                                                             | 34,1062959   | 1,38531978 | <b>2,61229854</b> | 5,09652066 | 58,0867519 | 2,5081E-14  | 9,43714E-13  | protein_coding |
| ENSMUSG00000021493 | Pdlim7        | PDZ and LIM domain 7 [Source:MGI Symbol;Acc:MGI:1914649]                                                                         | 10,42318747  | 1,38231502 | <b>2,60686346</b> | 3,3931523  | 24,2835861 | 8,31446E-07 | 9,24605E-06  | protein_coding |
| ENSMUSG00000036086 | Zranb3        | zinc finger, RAN-binding domain containing 3 [Source:MGI Symbol;Acc:MGI:1918362]                                                 | 15,98234818  | 1,37985318 | <b>2,60241885</b> | 4,00703621 | 30,4289649 | 3,46318E-08 | 5,03973E-07  | protein_coding |
| ENSMUSG00000001131 | Timp1         | tissue inhibitor of metalloproteinase 1 [Source:MGI Symbol;Acc:MGI:98752]                                                        | 4,286622452  | 1,37873878 | <b>2,60040942</b> | 2,16190505 | 11,5324028 | 0,000683936 | 0,003694395  | protein_coding |
| ENSMUSG00000032280 | Tie3          | transducin-like enhancer of split 3, homolog of Drosophila E(spl) [Source:MGI Symbol;Acc:MGI:104634]                             | 32,04274372  | 1,37734221 | <b>2,59789337</b> | 5,00302254 | 87,9934494 | 6,56716E-21 | 5,58999E-19  | protein_coding |
| ENSMUSG00000018537 | Pcgf2         | polycomb group ring finger 2 [Source:MGI Symbol;Acc:MGI:99161]                                                                   | 3,597062404  | 1,3722669  | <b>2,58877018</b> | 1,86968852 | 13,5593624 | 0,00231136  | 0,001420295  | protein_coding |
| ENSMUSG00000025025 | Mxi1          | Max interacting protein 1 [Source:MGI Symbol;Acc:MGI:97245]                                                                      | 11,00307874  | 1,37056417 | <b>2,58571662</b> | 3,4780237  | 39,3928766 | 3,46559E-10 | 7,1438E-09   | protein_coding |
| ENSMUSG00000037814 | Larp1b        | La ribonucleoprotein domain family, member 1B [Source:MGI Symbol;Acc:MGI:1914604]                                                | 2,429237755  | 1,36565785 | <b>2,58049274</b> | 1,30804331 | 12,6621083 | 0,000373141 | 0,00217212   | protein_coding |
| ENSMUSG00000026473 | Glul          | glutamate-ammonia ligase (glutamine synthetase) [Source:MGI Symbol;Acc:MGI:95739]                                                | 150,8001545  | 1,36817092 | <b>2,58143079</b> | 7,23791235 | 65,7728399 | 5,06008E-16 | 2,48192E-14  | protein_coding |
| ENSMUSG00000027568 | Fam84b        | family with sequence similarity 84, member B [Source:MGI Symbol;Acc:MGI:3026924]                                                 | 13,92604231  | 1,36583204 | <b>2,57724921</b> | 3,80561922 | 41,9202424 | 9,50073E-11 | 2,11451E-09  | protein_coding |
| ENSMUSG00000001665 | Gstt3         | glutathione S-transferase, theta 3 [Source:MGI Symbol;Acc:MGI:2143526]                                                           | 2,391661354  | 1,36560448 | <b>2,57648272</b> | 1,25614809 | 11,7113821 | 0,00062119  | 0,00393839   | protein_coding |
| ENSMUSG00000097081 |               |                                                                                                                                  | 1,738803654  | 1,35988227 | <b>2,56664234</b> | 0,8050104  | 8,97880174 | 0,002731297 | 0,012193726  | lincRNA        |
| ENSMUSG00000037820 | Tgm2          | transglutaminase 2, C polypeptide [Source:MGI Symbol;Acc:MGI:98731]                                                              | 86,92773109  | 1,35952916 | <b>2,56601421</b> | 6,44483546 | 76,5208124 | 2           |              |                |

|                     |               |                                                                                                                       |  |        |             |            |                   |            |            |             |              |                |
|---------------------|---------------|-----------------------------------------------------------------------------------------------------------------------|--|--------|-------------|------------|-------------------|------------|------------|-------------|--------------|----------------|
| ENSMUSG00000020644  | Id2           | inhibitor of DNA binding 2 [Source:MGI Symbol;Acc:MGI:96397]                                                          |  | Sheet1 | 168,5107621 | 1,36444485 | <b>2,54284733</b> | 7,39848406 | 46,5659699 | 8,85854E-12 | 2,29549E-10  | protein_coding |
| ENSMUSG00000036875  | Dna2          | DNA replication helicase 2 homolog (yeast) [Source:MGI Symbol;Acc:MGI:2443732]                                        |  |        | 4,691062019 | 1,34601128 | <b>2,54208325</b> | 2,23081461 | 10,9426102 | 0,000939777 | 0,004868141  | protein_coding |
| ENSMUSG00000004891  | Nes           | nestin [Source:MGI Symbol;Acc:MGI:101784]                                                                             |  |        | 2,680571584 | 1,34495854 | <b>2,54022897</b> | 1,44346049 | 8,13575431 | 0,004340079 | 0,019873343  | protein_coding |
| ENSMUSG00000027669  | Gnb4          | guanine nucleotide binding protein (G protein), beta 4 [Source:MGI Symbol;Acc:MGI:104581]                             |  |        | 4,929731158 | 1,34131022 | <b>2,53813329</b> | 2,31094101 | 11,1663225 | 0,000832956 | 0,004380892  | protein_coding |
| ENSMUSG00000023827  | Appgat4       | 1-acylglycerol-3-phosphate O-acyltransferase 4 (lysophosphatidic acid acyltransferase, delta) [Source:MGI Symbol;Acc: |  |        | 12,53083637 | 1,33928097 | <b>2,53025182</b> | 3,66258708 | 35,0129505 | 3,2752E-09  | 5,62259E-08  | protein_coding |
| ENSMUSG00000037594  | BC022687      | cDNA sequence BC022687 [Source:MGI Symbol;Acc:MGI:2443738]                                                            |  |        | 3,822425059 | 1,33792855 | <b>2,527881</b>   | 1,93324731 | 14,2900293 | 0,000156693 | 0,0001012695 | protein_coding |
| ENSMUSG00000026797  | Stxbp1        | syntaxin binding protein 1 [Source:MGI Symbol;Acc:MGI:107363]                                                         |  |        | 33,76164033 | 1,337734   | <b>2,52754013</b> | 5,08249223 | 55,2649988 | 1,05328E-13 | 3,63495E-12  | protein_coding |
| ENSMUSG00000005237  | Dnahc2        | dynein, axonemal, heavy chain 2 [Source:MGI Symbol;Acc:MGI:107731]                                                    |  |        | 2,636769388 | 1,33469617 | <b>2,52223588</b> | 1,39520931 | 12,6614889 | 0,000373285 | 0,002172172  | protein_coding |
| ENSMUSG00000030032  | Wdr54         | WD repeat domain 54 [Source:MGI Symbol;Acc:MGI:1922909]                                                               |  |        | 1,667275444 | 1,33454525 | <b>2,51818068</b> | 0,7789161  | 8,20756818 | 0,004171602 | 0,01740729   | protein_coding |
| ENSMUSG00000022885  | Stc6a1        | beta galactoside alpha 2,6 sialyltransferase 1 [Source:MGI Symbol;Acc:MGI:108470]                                     |  |        | 8,951275728 | 1,33353977 | <b>2,52020269</b> | 3,17057206 | 20,217584  | 6,91474E-06 | 6,2499E-05   | protein_coding |
| ENSMUSG00000031150  | Ccd120        | coiled-coil domain containing 120 [Source:MGI Symbol;Acc:MGI:1859619]                                                 |  |        | 2,41853796  | 1,3319307  | <b>2,51739342</b> | 1,28394287 | 11,7394709 | 0,000611884 | 0,003347994  | protein_coding |
| ENSMUSG00000028599  | Tnfrsf1b      | tumor necrosis factor receptor superfamily, member 1b [Source:MGI Symbol;Acc:MGI:1314883]                             |  |        | 887,865038  | 1,33087901 | <b>2,51558997</b> | 9,79437367 | 47,2751377 | 6,16897E-12 | 1,63322E-10  | protein_coding |
| ENSMUSG00000063193  | Cd300lb       | CD300 antigen like family member B [Source:MGI Symbol;Acc:MGI:2685099]                                                |  |        | 87,81172794 | 1,33066882 | <b>2,51414668</b> | 6,4585681  | 57,843747  | 2,83788E-14 | 1,06054E-12  | protein_coding |
| ENSMUSG00000072115  | Ang           | angiogenin, ribonuclease, RNase A family, 5 [Source:MGI Symbol;Acc:MGI:88022]                                         |  |        | 3,024599016 | 1,32911504 | <b>2,5124851</b>  | 1,58839783 | 11,5416719 | 0,000680534 | 0,003681452  | protein_coding |
| ENSMUSG00000021728  | Emb           | embigin [Source:MGI Symbol;Acc:MGI:95321]                                                                             |  |        | 91,6372549  | 1,32820306 | <b>2,51089736</b> | 6,52202672 | 67,3435496 | 2,28087E-16 | 1,16018E-14  | protein_coding |
| ENSMUSG00000021196  | Ptkp          | phosphofructokinase, platelet [Source:MGI Symbol;Acc:MGI:1891833]                                                     |  |        | 90,33467935 | 1,32764761 | <b>2,50993083</b> | 6,49960355 | 87,6711933 | 7,72919E-21 | 6,38501E-19  | protein_coding |
| ENSMUSG00000049848  | Ceacam19      | carcinoembryonic antigen-related cell adhesion molecule 19 [Source:MGI Symbol;Acc:MGI:2443001]                        |  |        | 5,688115743 | 1,32448119 | <b>2,5442809</b>  | 2,52511716 | 15,3157756 | 9,09388E-05 | 0,000627313  | protein_coding |
| ENSMUSG00000025366  | Esys1         | extended synaptotagmin-like protein 1 [Source:MGI Symbol;Acc:MGI:1344426]                                             |  |        | 277,2289964 | 1,32426642 | <b>2,50405529</b> | 8,11537286 | 46,803481  | 7,84739E-12 | 2,04796E-10  | protein_coding |
| ENSMUSG000000061436 | Hipk2         | homeodomain interacting protein kinase 2 [Source:MGI Symbol;Acc:MGI:1314872]                                          |  |        | 81,75133771 | 1,32061043 | <b>2,49970211</b> | 6,35449537 | 61,1896059 | 5,18345E-15 | 2,15722E-13  | protein_coding |
| ENSMUSG00000030060  | 8430410A17Rik | RIKEN cDNA 8430410A17 gene [Source:MGI Symbol;Acc:MGI:1914053]                                                        |  |        | 10,41962393 | 1,31869355 | <b>2,49440125</b> | 3,39708883 | 32,7011385 | 1,07474E-08 | 1,70392E-07  | protein_coding |
| ENSMUSG00000021458  | 2010111101Rik | RIKEN cDNA 2010111101 gene [Source:MGI Symbol;Acc:MGI:1919311]                                                        |  |        | 28,80148731 | 1,31708637 | <b>2,49162399</b> | 4,85138663 | 40,2828592 | 2,19728E-10 | 4,6786E-09   | protein_coding |
| ENSMUSG00000030108  | Slc6a13       | solute carrier family 6 (neurotransmitter transporter, GABA), member 13 [Source:MGI Symbol;Acc:MGI:95629]             |  |        | 3,839975225 | 1,31654067 | <b>2,49068171</b> | 1,93535153 | 14,1981417 | 0,000164533 | 0,001057148  | protein_coding |
| ENSMUSG00000032902  | Slc16a1       | solute carrier family 16 (monocarboxylic acid transporters), member 1 [Source:MGI Symbol;Acc:MGI:106013]              |  |        | 11,89723946 | 1,31627683 | <b>2,49022626</b> | 3,58685854 | 30,1371118 | 4,02554E-08 | 5,75144E-07  | protein_coding |
| ENSMUSG00000044813  | Shb           | src homology 2 domain-containing transforming protein B [Source:MGI Symbol;Acc:MGI:98294]                             |  |        | 4,595357904 | 1,31205655 | <b>2,4829523</b>  | 2,20064477 | 16,9496451 | 3,38454E-05 | 0,000289451  | protein_coding |
| ENSMUSG00000030852  | Tacc2         | transforming, acidic coiled-coil containing protein 2 [Source:MGI Symbol;Acc:MGI:1928899]                             |  |        | 9,205182132 | 1,31120278 | <b>2,48148336</b> | 3,20363189 | 25,0281708 | 5,64988E-07 | 6,39292E-06  | protein_coding |
| ENSMUSG00000040734  | Ppp1r13l      | protein phosphatase 1, regulatory (inhibitor) subunit 13 like [Source:MGI Symbol;Acc:MGI:3525053]                     |  |        | 5,604828609 | 1,30979927 | <b>2,47907044</b> | 2,50336092 | 17,7467081 | 2,52354E-05 | 0,000199612  | protein_coding |
| ENSMUSG00000023067  | Cdkn1a        | cyclin-dependent kinase inhibitor 1A (P21) [Source:MGI Symbol;Acc:MGI:104556]                                         |  |        | 371,9374981 | 1,30782092 | <b>2,47567326</b> | 8,53939399 | 35,812312  | 2,17271E-09 | 3,90696E-08  | protein_coding |
| ENSMUSG00000003657  | Calb2         | calbindin 2 [Source:MGI Symbol;Acc:MGI:101914]                                                                        |  |        | 11,12284518 | 1,30600675 | <b>2,4725621</b>  | 3,47830941 | 25,1775979 | 5,2286E-07  | 5,95302E-06  | protein_coding |
| ENSMUSG00000001768  | Rin2          | Ras and Rab interactor 2 [Source:MGI Symbol;Acc:MGI:1921280]                                                          |  |        | 57,46778259 | 1,30576045 | <b>2,47214001</b> | 5,85145886 | 49,2732429 | 2,22679E-12 | 6,33828E-11  | protein_coding |
| ENSMUSG00000019992  | Fam54a        | family with sequence similarity 54, member A [Source:MGI Symbol;Acc:MGI:1919054]                                      |  |        | 5,746067801 | 1,30428043 | <b>2,46905252</b> | 2,55183787 | 15,5779079 | 7,91743E-05 | 0,000555484  | protein_coding |
| ENSMUSG00000049625  | Tifab         | TRAF-interacting protein with forkhead-associated domain, family member B [Source:MGI Symbol;Acc:MGI:2385852]         |  |        | 24,69823183 | 1,30424999 | <b>2,46955311</b> | 4,62826607 | 55,9978305 | 7,2551E-14  | 2,53859E-12  | protein_coding |
| ENSMUSG00000039959  | Hip1          | huntingtin interacting protein 1 [Source:MGI Symbol;Acc:MGI:1099804]                                                  |  |        | 87,53836214 | 1,30368462 | <b>2,4685855</b>  | 6,45450464 | 47,8934403 | 4,50025E-12 | 1,20596E-10  | protein_coding |
| ENSMUSG00000056501  | Cebpb         | CCAAT/enhancer binding protein (C/EBP), beta [Source:MGI Symbol;Acc:MGI:88373]                                        |  |        | 119,3148017 | 1,3034705  | <b>2,46821916</b> | 6,90065133 | 79,6452986 | 4,48035E-19 | 3,01997E-17  | protein_coding |
| ENSMUSG00000044042  | Fmn1          | formin 1 [Source:MGI Symbol;Acc:MGI:101815]                                                                           |  |        | 54,09022114 | 1,30314099 | <b>2,46765549</b> | 5,76241283 | 50,0497368 | 1,49898E-12 | 4,35695E-11  | protein_coding |
| ENSMUSG00000020696  | Rffi          | ring finger and FYVE like domain containing protein [Source:MGI Symbol;Acc:MGI:1914588]                               |  |        | 16,60014233 | 1,30175915 | <b>2,46529305</b> | 4,06738128 | 38,9343137 | 4,38308E-10 | 8,90146E-09  | protein_coding |
| ENSMUSG00000034157  | 231004G17Rik  | RIKEN cDNA 231004G17 gene [Source:MGI Symbol;Acc:MGI:1919185]                                                         |  |        | 78,05176996 | 1,29948237 | <b>2,46140553</b> | 6,28770136 | 41,4831735 | 1,1889E-10  | 2,61772E-09  | protein_coding |
| ENSMUSG00000040415  | Dtx3          | deltex 3 homolog (Drosophila) [Source:MGI Symbol;Acc:MGI:2135752]                                                     |  |        | 24,13202636 | 1,29579986 | <b>2,45513076</b> | 4,59796012 | 49,7413254 | 1,75412E-12 | 5,07172E-11  | protein_coding |
| ENSMUSG00000032369  | Plscr1        | phospholipid scramblase 1 [Source:MGI Symbol;Acc:MGI:893575]                                                          |  |        | 19,14648717 | 1,2893006  | <b>2,4440954</b>  | 4,2660634  | 46,3091378 | 1,00992E-11 | 2,59252E-10  | protein_coding |
| ENSMUSG00000036273  | Lrk2          | leucine-rich repeat kinase 2 [Source:MGI Symbol;Acc:MGI:1913975]                                                      |  |        | 5,362303348 | 1,28281858 | <b>2,43313872</b> | 2,42754688 | 14,3626135 | 0,000150766 | 0,000979001  | protein_coding |
| ENSMUSG00000063954  | Hist2h2aa1    | histone cluster 2, H2aa1 [Source:MGI Symbol;Acc:MGI:96097]                                                            |  |        | 12,63020977 | 1,28043755 | <b>2,42912638</b> | 3,64141388 | 17,6184846 | 2,69957E-05 | 0,00021201   | protein_coding |
| ENSMUSG00000043346  | Gm6741        | predicted gene 6741 [Source:MGI Symbol;Acc:MGI:3643504]                                                               |  |        | 4,465784272 | 1,28009723 | <b>2,42855344</b> | 2,13217806 | 7,52095159 | 0,006098546 | 0,023995924  | protein_coding |
| ENSMUSG00000006219  | Fblim1        | filamin binding LIM protein 1 [Source:MGI Symbol;Acc:MGI:1921452]                                                     |  |        | 90,50402793 | 1,27864754 | <b>2,42611432</b> | 6,50011744 | 45,0292157 | 1,94117E-11 | 4,82525E-10  | protein_coding |
| ENSMUSG00000046711  | Hmgc1         | high mobility group AT-hook 1 [Source:MGI Symbol;Acc:MGI:96160]                                                       |  |        | 258,0699648 | 1,27579704 | <b>2,42132551</b> | 8,01182743 | 49,6067357 | 1,87868E-12 | 5,41759E-11  | protein_coding |
| ENSMUSG00000026478  | Lamc1         | laminin, gamma 1 [Source:MGI Symbol;Acc:MGI:99914]                                                                    |  |        | 30,50354261 | 1,27466458 | <b>2,4194256</b>  | 4,93778077 | 46,50589   | 9,13435E-12 | 2,36139E-10  | protein_coding |
| ENSMUSG00000019947  | Arid5b        | AT rich interactive domain 5B (MRF1-like) [Source:MGI Symbol;Acc:MGI:2175912]                                         |  |        | 16,12906294 | 1,27433101 | <b>2,41903393</b> | 4,02397358 | 42,2490407 | 8,03594E-11 | 1,81295E-09  | protein_coding |
| ENSMUSG00000059013  | Sh2d3c        | SH2 domain containing 3C [Source:MGI Symbol;Acc:MGI:1351631]                                                          |  |        | 47,89886367 | 1,26960597 | <b>2,41095709</b> | 5,57645427 | 35,8178702 | 2,06592E-09 | 3,90212E-08  | protein_coding |
| ENSMUSG00000016227  | Ildr1         | interferon-related developmental regulator 1 [Source:MGI Symbol;Acc:MGI:1316717]                                      |  |        | 73,49437115 | 1,26953819 | <b>2,41084382</b> | 6,20350387 | 71,251042  | 3,14545E-17 | 1,70242E-15  | protein_coding |
| ENSMUSG00000035919  | Bbs9          | Bardet-Biedl syndrome 9 (human) [Source:MGI Symbol;Acc:MGI:2442833]                                                   |  |        | 3,951178334 | 1,26729822 | <b>2,40716357</b> | 1,99127408 | 14,5770509 | 0,000134543 | 0,000885165  | protein_coding |
| ENSMUSG00000026785  | Pkn3          | protein kinase N3 [Source:MGI Symbol;Acc:MGI:2388285]                                                                 |  |        | 3,745707933 | 1,26404955 | <b>2,40668872</b> | 1,92210645 | 13,6915763 | 0,000215419 | 0,001338501  | protein_coding |
| ENSMUSG00000000278  | Scpep1        | serine carboxypeptidase 1 [Source:MGI Symbol;Acc:MGI:1921867]                                                         |  |        | 169,0997395 | 1,26259076 | <b>2,39926209</b> | 7,4034439  | 59,5473705 | 1,19386E-14 | 4,66793E-13  | protein_coding |
| ENSMUSG00000009687  | Fxyd5         | FXYD domain-containing ion transport regulator 5 [Source:MGI Symbol;Acc:MGI:1201785]                                  |  |        | 180,3656575 | 1,25919837 | <b>2,39362702</b> | 7,49602047 | 63,6009533 | 1,52355E-15 | 7,03322E-14  | protein_coding |
| ENSMUSG00000030122  | Ptms          | parathyromosin [Source:MGI Symbol;Acc:MGI:1916452]                                                                    |  |        | 113,7150915 | 1,25774962 | <b>2,39122456</b> | 6,82947333 | 73,3237649 | 1,10035E-17 | 6,32961E-16  | protein_coding |
| ENSMUSG00000071454  | Dtnb          | dystrobrevin, beta [Source:MGI Symbol;Acc:MGI:1203728]                                                                |  |        | 6,082456058 | 1,25714738 | <b>2,39022657</b> | 2,60514438 | 17,2459895 | 3,2839E-05  | 0,000251605  | protein_coding |
| ENSMUSG00000034957  | Cebpa         | CCAAT/enhancer binding protein (C/EBP), alpha [Source:MGI Symbol;Acc:MGI:99480]                                       |  |        | 62,26641796 | 1,25381291 | <b>2,38470847</b> | 5,96079445 | 36,6672732 | 1,40112E-09 | 2,57858E-08  | protein_coding |
| ENSMUSG00000022257  | Laptm4b       | lysosomal-associated protein transmembrane 4B [Source:MGI Symbol;Acc:MGI:1890494]                                     |  |        | 7,286145139 | 1,25051389 | <b>2,37926157</b> | 2,87807211 | 17,8131366 | 2,43695E-05 | 0,000193599  | protein_coding |
| ENSMUSG00000050460  | Slc8a1        | solute carrier family 8 (sodium/calcium exchanger), member 1 [Source:MGI Symbol;Acc:MGI:107956]                       |  |        | 6,67901221  | 1,24965974 | <b>2,37785335</b> | 2,76205452 | 16,8734856 | 3,99558E-05 | 0,00029986   | protein_coding |
| ENSMUSG00000035042  | Ccl5          | chemokine (C-C motif) ligand 5 [Source:MGI Symbol;Acc:MGI:98262]                                                      |  |        | 7,881119518 | 1,24772079 | <b>2,37465972</b> | 3,00438007 | 24,9528328 | 5,87501E-07 | 6,62718E-06  | protein_coding |
| ENSMUSG00000035235  | Trim13        | tripartite motif-containing 13 [Source:MGI Symbol;Acc:MGI:1913847]                                                    |  |        | 13,22161629 | 1,2470314  | <b>2,37352525</b> | 3,73560989 | 33,3662684 | 7,63366E-09 | 1,2334E-07   | protein_coding |
| ENSMUSG00000026043  | Col3a1        | collagen, type III, alpha 1 [Source:MGI Symbol;Acc:MGI:88453]                                                         |  |        | 8,087729199 | 1,24428206 | <b>2,36900633</b> | 3,04531489 | 11,6091727 | 0,000656273 | 0,003558971  | protein_coding |
| ENSMUSG00000028417  | Tal2          | T cell acute lymphocytic leukemia 2 [Source:MGI Symbol;Acc:MGI:99540]                                                 |  |        | 7,220157268 | 1,24222653 | <b>2,36891517</b> | 2,8638598  | 24,0286016 | 9,49152E-07 | 1,04283E-05  | protein_coding |
| ENSMUSG00000028063  | Lmna          | lamin A [Source:MGI Symbol;Acc:MGI:96794]                                                                             |  |        | 213,816664  | 1,24420776 | <b>2,36888434</b> | 7,74021702 | 51,0900504 | 8,82243E-13 | 2,62689E-11  | protein_coding |
| ENSMUSG000000057329 | Bcl2          | B cell leukemia/lymphoma 2 [Source:MGI Symbol;Acc:MGI:88138]                                                          |  |        | 7,307337362 | 1,24261075 | <b>2,36626312</b> | 2,87307446 | 15,6709694 | 7,53722E-05 | 0,000533235  | protein_coding |
| ENSMUSG00000089942  | Pira2         | paired-Ig-like receptor A2 [Source:MGI Symbol;Acc:MGI:1195970]                                                        |  |        | 43,44785375 | 1,24094115 | <b>2,36352668</b> | 5,4405674  | 48,5400947 | 3,23605E-12 | 9,04693E-11  | protein_coding |
| ENSMUSG00000048612  | Myof          | myoferlin [Source:MGI Symbol;Acc:MGI:191912]                                                                          |  |        | 245,914846  | 1,24045834 | <b>2,36273584</b> | 7,94256659 | 48,5019636 | 3,29958E-12 |              |                |



|                     |               |                                                                                                                         |  |  |  |  |  |  |  |  |  |  |
|---------------------|---------------|-------------------------------------------------------------------------------------------------------------------------|--|--|--|--|--|--|--|--|--|--|
| ENSMUSG00000024164  | C3            | complement component 3 [Source:MGI Symbol;Acc:MGI:88227]                                                                |  |  |  |  |  |  |  |  |  |  |
| ENSMUSG00000028716  | Pdzk1ip1      | PDZK1 interacting protein 1 [Source:MGI Symbol;Acc:MGI:1914432]                                                         |  |  |  |  |  |  |  |  |  |  |
| ENSMUSG00000029490  | Mfsd7a        | major facilitator superfamily domain containing 7A [Source:MGI Symbol;Acc:MGI:2442629]                                  |  |  |  |  |  |  |  |  |  |  |
| ENSMUSG00000029223  | Uchl1         | ubiquitin carboxy-terminal hydrolase L1 [Source:MGI Symbol;Acc:MGI:103149]                                              |  |  |  |  |  |  |  |  |  |  |
| ENSMUSG00000002059  | Rab34         | RAB34, member of RAS oncogene family [Source:MGI Symbol;Acc:MGI:104606]                                                 |  |  |  |  |  |  |  |  |  |  |
| ENSMUSG000000098210 | H1f0          | H1 histone family, member 0 [Source:MGI Symbol;Acc:MGI:95893]                                                           |  |  |  |  |  |  |  |  |  |  |
| ENSMUSG00000075297  | H60b          | histocompatibility 60b [Source:MGI Symbol;Acc:MGI:3649078]                                                              |  |  |  |  |  |  |  |  |  |  |
| ENSMUSG00000026389  | Steap3        | STEAP family member 3 [Source:MGI Symbol;Acc:MGI:1915678]                                                               |  |  |  |  |  |  |  |  |  |  |
| ENSMUSG00000023495  | Pcbp4         | poly(rC) binding protein 4 [Source:MGI Symbol;Acc:MGI:1890471]                                                          |  |  |  |  |  |  |  |  |  |  |
| ENSMUSG00000037465  | Klf10         | Kruppel-like factor 10 [Source:MGI Symbol;Acc:MGI:1101353]                                                              |  |  |  |  |  |  |  |  |  |  |
| ENSMUSG00000022074  | Tnfrsf10b     | tumor necrosis factor receptor superfamily, member 10b [Source:MGI Symbol;Acc:MGI:1341090]                              |  |  |  |  |  |  |  |  |  |  |
| ENSMUSG00000029444  | Cd36          | CD36 antigen [Source:MGI Symbol;Acc:MGI:107899]                                                                         |  |  |  |  |  |  |  |  |  |  |
| ENSMUSG00000031808  | Slc27a1       | solute carrier family 27 (fatty acid transporter), member 1 [Source:MGI Symbol;Acc:MGI:1347098]                         |  |  |  |  |  |  |  |  |  |  |
| ENSMUSG00000027435  | Cd93          | CD93 antigen [Source:MGI Symbol;Acc:MGI:106664]                                                                         |  |  |  |  |  |  |  |  |  |  |
| ENSMUSG00000028717  | Tal1          | T cell acute lymphocytic leukemia 1 [Source:MGI Symbol;Acc:MGI:98480]                                                   |  |  |  |  |  |  |  |  |  |  |
| ENSMUSG00000054000  | Tusc1         | tumor suppressor candidate 1 [Source:MGI Symbol;Acc:MGI:2684283]                                                        |  |  |  |  |  |  |  |  |  |  |
| ENSMUSG00000015837  | Sqstm1        | sequestosome 1 [Source:MGI Symbol;Acc:MGI:107931]                                                                       |  |  |  |  |  |  |  |  |  |  |
| ENSMUSG00000042659  | Ardc4         | arrestin domain containing 4 [Source:MGI Symbol;Acc:MGI:1913662]                                                        |  |  |  |  |  |  |  |  |  |  |
| ENSMUSG00000021796  | Bmpr1a        | bone morphogenetic protein receptor, type 1A [Source:MGI Symbol;Acc:MGI:1338938]                                        |  |  |  |  |  |  |  |  |  |  |
| ENSMUSG00000072844  | G530011006Rik | RIKEN cDNA G530011006 gene [Source:MGI Symbol;Acc:MGI:3603513]                                                          |  |  |  |  |  |  |  |  |  |  |
| ENSMUSG00000050106  | Tmc8          | transmembrane channel-like gene family 8 [Source:MGI Symbol;Acc:MGI:2669037]                                            |  |  |  |  |  |  |  |  |  |  |
| ENSMUSG00000028412  | Slc44a1       | solute carrier family 44, member 1 [Source:MGI Symbol;Acc:MGI:2140592]                                                  |  |  |  |  |  |  |  |  |  |  |
| ENSMUSG00000079037  | Prnp          | prion protein [Source:MGI Symbol;Acc:MGI:97769]                                                                         |  |  |  |  |  |  |  |  |  |  |
| ENSMUSG00000031379  | Pir           | pirin [Source:MGI Symbol;Acc:MGI:1916906]                                                                               |  |  |  |  |  |  |  |  |  |  |
| ENSMUSG00000043085  | Tmem82        | transmembrane protein 82 [Source:MGI Symbol;Acc:MGI:2384869]                                                            |  |  |  |  |  |  |  |  |  |  |
| ENSMUSG00000021876  | Rnase4        | ribonuclease, RNase A family 4 [Source:MGI Symbol;Acc:MGI:1926217]                                                      |  |  |  |  |  |  |  |  |  |  |
| ENSMUSG00000037905  | Bri3bp        | Bri3 binding protein [Source:MGI Symbol;Acc:MGI:1924059]                                                                |  |  |  |  |  |  |  |  |  |  |
| ENSMUSG00000032122  | Slc37a2       | solute carrier family 37 (glycerol-3-phosphate transporter), member 2 [Source:MGI Symbol;Acc:MGI:1929693]               |  |  |  |  |  |  |  |  |  |  |
| ENSMUSG00000033039  | Mical1        | microtubule associated monooxygenase, calponin and LIM domain containing -like 1 [Source:MGI Symbol;Acc:MGI:10587]      |  |  |  |  |  |  |  |  |  |  |
| ENSMUSG00000026814  | Eng           | endoglin [Source:MGI Symbol;Acc:MGI:95392]                                                                              |  |  |  |  |  |  |  |  |  |  |
| ENSMUSG00000041716  | AK010878      | cDNA sequence AK010878 [Source:MGI Symbol;Acc:MGI:4845848]                                                              |  |  |  |  |  |  |  |  |  |  |
| ENSMUSG00000023947  | Nfkbie        | nuclear factor of kappa light polypeptide gene enhancer in B cells inhibitor, epsilon [Source:MGI Symbol;Acc:MGI:11949] |  |  |  |  |  |  |  |  |  |  |
| ENSMUSG00000044340  | Phlpp1        | PH domain and leucine rich repeat protein phosphatase 1 [Source:MGI Symbol;Acc:MGI:2138237]                             |  |  |  |  |  |  |  |  |  |  |
| ENSMUSG00000001313  | Rnd2          | Rho family GTPase 2 [Source:MGI Symbol;Acc:MGI:1338755]                                                                 |  |  |  |  |  |  |  |  |  |  |
| ENSMUSG00000064220  | Hist2h2aa2    | histone cluster 2, H2aa2 [Source:MGI Symbol;Acc:MGI:2448283]                                                            |  |  |  |  |  |  |  |  |  |  |
| ENSMUSG00000043953  | Ccr2l         | chemokine (C-C motif) receptor-like 2 [Source:MGI Symbol;Acc:MGI:1920904]                                               |  |  |  |  |  |  |  |  |  |  |
| ENSMUSG00000067825  | Pex26b        | peroxisomal biogenesis factor 26 [Source:MGI Symbol;Acc:MGI:1921293]                                                    |  |  |  |  |  |  |  |  |  |  |
| ENSMUSG00000030427  | Lilra6        | leukocyte immunoglobulin-like receptor, subfamily A (with TM domain), member 6 [Source:MGI Symbol;Acc:MGI:119596]       |  |  |  |  |  |  |  |  |  |  |
| ENSMUSG00000062593  | Lilrb4        | leukocyte immunoglobulin-like receptor, subfamily B, member 4 [Source:MGI Symbol;Acc:MGI:102701]                        |  |  |  |  |  |  |  |  |  |  |
| ENSMUSG00000075010  | AW112010      | expressed sequence AW112010 [Source:MGI Symbol;Acc:MGI:2147706]                                                         |  |  |  |  |  |  |  |  |  |  |
| ENSMUSG00000027935  | Rab13         | RAB13, member RAS oncogene family [Source:MGI Symbol;Acc:MGI:1927232]                                                   |  |  |  |  |  |  |  |  |  |  |
| ENSMUSG00000042289  | Hsd3b7        | hydroxy-delta-5-steroid dehydrogenase, 3 beta- and steroid delta-isomerase 7 [Source:MGI Symbol;Acc:MGI:2141879]        |  |  |  |  |  |  |  |  |  |  |
| ENSMUSG00000050931  | Sgms2         | sphingomyelin synthase 2 [Source:MGI Symbol;Acc:MGI:1921692]                                                            |  |  |  |  |  |  |  |  |  |  |
| ENSMUSG00000001473  | Tubb6         | tubulin, beta 6 class V [Source:MGI Symbol;Acc:MGI:1915201]                                                             |  |  |  |  |  |  |  |  |  |  |
| ENSMUSG00000041308  | Sntb2         | syntrophin, basic 2 [Source:MGI Symbol;Acc:MGI:101771]                                                                  |  |  |  |  |  |  |  |  |  |  |
| ENSMUSG00000031373  | Car5b         | carbonic anhydrase 5b, mitochondrial [Source:MGI Symbol;Acc:MGI:1926249]                                                |  |  |  |  |  |  |  |  |  |  |
| ENSMUSG00000023050  | Map3k12       | mitogen-activated protein kinase kinase kinase 12 [Source:MGI Symbol;Acc:MGI:1346881]                                   |  |  |  |  |  |  |  |  |  |  |
| ENSMUSG00000032350  | Gclc          | glutamate-cysteine ligase, catalytic subunit [Source:MGI Symbol;Acc:MGI:104990]                                         |  |  |  |  |  |  |  |  |  |  |
| ENSMUSG00000034854  | Mfsd12        | major facilitator superfamily domain containing 12 [Source:MGI Symbol;Acc:MGI:3604804]                                  |  |  |  |  |  |  |  |  |  |  |
| ENSMUSG00000027318  | Adam33        | a disintegrin and metallopeptidase domain 33 [Source:MGI Symbol;Acc:MGI:1341813]                                        |  |  |  |  |  |  |  |  |  |  |
| ENSMUSG00000039960  | Rhou          | ras homolog gene family, member U [Source:MGI Symbol;Acc:MGI:1916831]                                                   |  |  |  |  |  |  |  |  |  |  |
| ENSMUSG00000025037  | Maoa          | monoamine oxidase A [Source:MGI Symbol;Acc:MGI:96915]                                                                   |  |  |  |  |  |  |  |  |  |  |
| ENSMUSG00000017009  | Sdc4          | syndecan 4 [Source:MGI Symbol;Acc:MGI:1349164]                                                                          |  |  |  |  |  |  |  |  |  |  |
| ENSMUSG00000047205  | Dusp18        | dual specificity phosphatase 18 [Source:MGI Symbol;Acc:MGI:1922469]                                                     |  |  |  |  |  |  |  |  |  |  |
| ENSMUSG00000035678  | Tnfsf9        | tumor necrosis factor (ligand) superfamily, member 9 [Source:MGI Symbol;Acc:MGI:1101058]                                |  |  |  |  |  |  |  |  |  |  |
| ENSMUSG00000029553  | Tfec          | transcription factor EC [Source:MGI Symbol;Acc:MGI:1333760]                                                             |  |  |  |  |  |  |  |  |  |  |
| ENSMUSG00000015143  | Actn1         | actinin, alpha 1 [Source:MGI Symbol;Acc:MGI:2137706]                                                                    |  |  |  |  |  |  |  |  |  |  |
| ENSMUSG00000040522  | Tlr8          | tolllike receptor 8 [Source:MGI Symbol;Acc:MGI:2176887]                                                                 |  |  |  |  |  |  |  |  |  |  |
| ENSMUSG00000033318  | Gstt2         | glutathione S-transferase, theta 2 [Source:MGI Symbol;Acc:MGI:106188]                                                   |  |  |  |  |  |  |  |  |  |  |
| ENSMUSG00000071266  | Zfp946        | zinc finger protein 946 [Source:MGI Symbol;Acc:MGI:1921399]                                                             |  |  |  |  |  |  |  |  |  |  |
| ENSMUSG00000027230  | Creb3l1       | cAMP responsive element binding protein 3-like 1 [Source:MGI Symbol;Acc:MGI:1347062]                                    |  |  |  |  |  |  |  |  |  |  |
| ENSMUSG00000039981  | Zc3h12d       | zinc finger CCH type containing 12D [Source:MGI Symbol;Acc:MGI:3045313]                                                 |  |  |  |  |  |  |  |  |  |  |
| ENSMUSG00000045404  | Kcnk13        | potassium channel, subfamily K, member 13 [Source:MGI Symbol;Acc:MGI:2384976]                                           |  |  |  |  |  |  |  |  |  |  |
| ENSMUSG00000037992  | Rara          | retinoic acid receptor, alpha [Source:MGI Symbol;Acc:MGI:97856]                                                         |  |  |  |  |  |  |  |  |  |  |
| ENSMUSG00000020773  | Trim47        | tripartite motif-containing 47 [Source:MGI Symbol;Acc:MGI:1917374]                                                      |  |  |  |  |  |  |  |  |  |  |
| ENSMUSG00000030671  | Pde3b         | phosphodiesterase 3B, cGMP-inhibited [Source:MGI Symbol;Acc:MGI:1333863]                                                |  |  |  |  |  |  |  |  |  |  |
| ENSMUSG00000020704  | Slc43a3       | solute carrier family 43, member 3 [Source:MGI Symbol;Acc:MGI:1931054]                                                  |  |  |  |  |  |  |  |  |  |  |
| ENSMUSG00000036381  | P2ry14        | purinergic receptor P2Y, G-protein coupled, 14 [Source:MGI Symbol;Acc:MGI:2155705]                                      |  |  |  |  |  |  |  |  |  |  |
| ENSMUSG00000026536  | Mnda          | myeloid cell nuclear differentiation antigen [Source:MGI Symbol;Acc:MGI:3041120]                                        |  |  |  |  |  |  |  |  |  |  |
| ENSMUSG00000018983  | Ezfl2         | E2F transcription factor 2 [Source:MGI Symbol;Acc:MGI:1096341]                                                          |  |  |  |  |  |  |  |  |  |  |
| ENSMUSG00000008398  | Elk3          | ELK3, member of ETS oncogene family [Source:MGI Symbol;Acc:MGI:101762]                                                  |  |  |  |  |  |  |  |  |  |  |

|                     |               |                                                                                                                                     |        |             |            |                   |            |            |               |             |                      |
|---------------------|---------------|-------------------------------------------------------------------------------------------------------------------------------------|--------|-------------|------------|-------------------|------------|------------|---------------|-------------|----------------------|
| ENSMUSG00000028108  | Ecm1          | extracellular matrix protein 1 [Source:MGI Symbol;Acc:MGI:10360]                                                                    | Sheet1 | 31,20258614 | 1,13610811 | <b>2,19787313</b> | 4,97073421 | 25,0196173 | 5,675E-07     | 6,41473E-06 | protein_coding       |
| ENSMUSG00000006800  | Sulf2         | sulfatase 2 [Source:MGI Symbol;Acc:MGI:191293]                                                                                      |        | 6,139039842 | 1,13238117 | <b>2,19220266</b> | 2,63336827 | 10,9759046 | 0,000923042   | 0,004788225 | protein_coding       |
| ENSMUSG00000045679  | Pqlc3         | PQ loop repeat containing [Source:MGI Symbol;Acc:MGI:2444067]                                                                       |        | 70,01802161 | 1,1131533  | <b>2,19091422</b> | 6,13246576 | 33,9723074 | 5,59021E-09   | 9,27789E-08 | protein_coding       |
| ENSMUSG00000000957  | Mmp14         | matrix metalloproteinase 14 (membrane-inserted) [Source:MGI Symbol;Acc:MGI:101900]                                                  |        | 66,18078327 | 1,13095872 | <b>2,19004228</b> | 6,05857377 | 72,359924  | 5,92719E-17   | 1,00009E-15 | protein_coding       |
| ENSMUSG00000035929  | H2-Q4         | histocompatibility 2, Q region locus 4 [Source:MGI Symbol;Acc:MGI:95933]                                                            |        | 60,22056075 | 1,12660186 | <b>2,18343844</b> | 5,91235939 | 63,2685856 | 1,80358E-15   | 8,1884E-14  | protein_coding       |
| ENSMUSG00000040613  | Apobec1       | apolipoprotein B mRNA editing enzyme, catalytic polypeptide 1 [Source:MGI Symbol;Acc:MGI:103298]                                    |        | 124,4742511 | 1,12515188 | <b>2,18124508</b> | 6,96099347 | 52,4598172 | 4,39142E-13   | 1,36295E-11 | protein_coding       |
| ENSMUSG00000055148  | Klf2          | Kruppel-like factor 2 (lung) [Source:MGI Symbol;Acc:MGI:1342772]                                                                    |        | 10,17303236 | 1,12446969 | <b>2,18021391</b> | 3,32738154 | 26,8201908 | 2,23292E-07   | 2,71384E-06 | protein_coding       |
| ENSMUSG00000081534  | Slc48a1       | solute carrier family 48 (heme transporter), member 1 [Source:MGI Symbol;Acc:MGI:1914989]                                           |        | 421,1782366 | 1,12306919 | <b>2,17890849</b> | 8,71874715 | 28,8352589 | 7,88034E-08   | 1,0581E-06  | protein_coding       |
| ENSMUSG00000032688  | Malt1         | mucosa associated lymphoid tissue lymphoma translocation gene 1 [Source:MGI Symbol;Acc:MGI:2445027]                                 |        | 29,79193839 | 1,12243245 | <b>2,17713738</b> | 4,9016628  | 50,8172075 | 1,01381E-12   | 2,97827E-11 | protein_coding       |
| ENSMUSG00000073421  | H2-Ab1        | histocompatibility 2, class II antigen A, beta 1 [Source:MGI Symbol;Acc:MGI:103070]                                                 |        | 9,258540238 | 1,12224016 | <b>2,17684722</b> | 3,2017232  | 17,9091006 | 2,3171E-05    | 0,000185554 | protein_coding       |
| ENSMUSG00000097855  |               |                                                                                                                                     |        | 1,651862121 | 1,12028896 | <b>2,17387496</b> | 0,71165306 | 6,55215312 | 0,014757531   | 0,037750612 | lincRNA              |
| ENSMUSG00000074800  | Gm4149        | predicted pseudogene 4149 [Source:MGI Symbol;Acc:MGI:3782325]                                                                       |        | 6,990019792 | 1,11780335 | <b>2,17016292</b> | 2,83191585 | 6,42099147 | 0,011277918   | 0,040126452 | processed_pseudogene |
| ENSMUSG00000078880  | Gm14308       | predicted gene 14308 [Source:MGI Symbol;Acc:MGI:3782921]                                                                            |        | 3,367797263 | 1,11596445 | <b>2,16739852</b> | 1,83245446 | 6,73569917 | 0,009450219   | 0,034679209 | protein_coding       |
| ENSMUSG00000029925  | Tbxas1        | thromboxane A synthase 1, platelet [Source:MGI Symbol;Acc:MGI:98497]                                                                |        | 80,82710468 | 1,11514675 | <b>2,16617042</b> | 6,33944845 | 56,1429096 | 6,73902E-14   | 2,38803E-12 | protein_coding       |
| ENSMUSG00000040212  | Emp3          | epithelial membrane protein 3 [Source:MGI Symbol;Acc:MGI:1098729]                                                                   |        | 141,713677  | 1,11434378 | <b>2,16496511</b> | 7,14826048 | 35,7133098 | 2,28597E-09   | 4,09054E-08 | protein_coding       |
| ENSMUSG00000032507  | Fbxl2         | F-box and leucine-rich repeat protein 2 [Source:MGI Symbol;Acc:MGI:1919429]                                                         |        | 5,248099141 | 1,1139779  | <b>2,16441613</b> | 2,392557   | 12,1565823 | 0,000489149   | 0,002753219 | protein_coding       |
| ENSMUSG00000052151  | Ppap2c        | phosphatidic acid phosphatase type 2C [Source:MGI Symbol;Acc:MGI:1354945]                                                           |        | 11,71877823 | 1,11331675 | <b>2,16342446</b> | 3,56482353 | 20,749734  | 5,23388E-06   | 4,07774E-05 | protein_coding       |
| ENSMUSG00000037649  | H2-DMa        | histocompatibility 2, class II, locus DMA [Source:MGI Symbol;Acc:MGI:95921]                                                         |        | 6,590656377 | 1,11307146 | <b>2,16305667</b> | 2,73169492 | 17,7318785 | 2,54329E-05   | 0,000200885 | protein_coding       |
| ENSMUSG00000018906  | P4ha2         | procollagen-proline, 2-oxoglutarate 4-dioxygenase (proline 4-hydroxylase), alpha II polypeptide [Source:MGI Symbol;Acc:MGI:1933044] |        | 15,53399185 | 1,11273061 | <b>2,16254569</b> | 3,97163745 | 24,0021179 | 9,62298E-07   | 1,05622E-05 | protein_coding       |
| ENSMUSG00000026315  | Serpinb8      | serine (or cysteine) peptidase inhibitor, clade B, member 8 [Source:MGI Symbol;Acc:MGI:894657]                                      |        | 31,27371486 | 1,11267596 | <b>2,16246376</b> | 4,97476322 | 45,7117169 | 1,37001E-11   | 3,6029E-10  | protein_coding       |
| ENSMUSG00000020261  | Slc36a1       | solute carrier family 36 (proton/amino acid symporter), member 1 [Source:MGI Symbol;Acc:MGI:2445299]                                |        | 56,59031474 | 1,11123534 | <b>2,16030555</b> | 5,82511247 | 55,0136153 | 1,19698E-13   | 4,06603E-12 | protein_coding       |
| ENSMUSG00000028862  | Map3k6        | mitogen-activated protein kinase kinase kinase 6 [Source:MGI Symbol;Acc:MGI:1855691]                                                |        | 4,762213614 | 1,10974906 | <b>2,15808107</b> | 2,25484817 | 13,2839883 | 0,000267682   | 0,001615949 | protein_coding       |
| ENSMUSG00000051344  | Plekhd3       | pleckstrin homology domain containing, family M, member 3 [Source:MGI Symbol;Acc:MGI:2443627]                                       |        | 60,48912273 | 1,10915339 | <b>2,1571902</b>  | 5,92236952 | 41,1101546 | 1,43887E-10   | 3,12428E-09 | protein_coding       |
| ENSMUSG00000074003  | Gas2l3        | growth arrest-specific 2 like 3 [Source:MGI Symbol;Acc:MGI:1918780]                                                                 |        | 54,98218348 | 1,10674782 | <b>2,15396228</b> | 5,78292305 | 36,2043249 | 1,77676E-09   | 3,22665E-08 | protein_coding       |
| ENSMUSG00000028085  | Aifm2         | apoptosis-inducing factor, mitochondrion-associated 2 [Source:MGI Symbol;Acc:MGI:1918611]                                           |        | 15,47903518 | 1,1062637  | <b>2,15287373</b> | 3,96041429 | 23,9004384 | 1,01449E-06   | 1,10687E-05 | protein_coding       |
| ENSMUSG00000024781  | Lipa          | lysosomal acid lipase A [Source:MGI Symbol;Acc:MGI:96789]                                                                           |        | 723,5152877 | 1,10466207 | <b>2,150485</b>   | 9,49905661 | 19,6382938 | 9,35748E-06   | 8,17905E-05 | protein_coding       |
| ENSMUSG00000022272  | Myo10         | myosin X [Source:MGI Symbol;Acc:MGI:107716]                                                                                         |        | 54,17800421 | 1,1032978  | <b>2,14845237</b> | 5,76289704 | 38,50133   | 5,47164E-10   | 1,07748E-08 | protein_coding       |
| ENSMUSG00000038668  | Lpar1         | lysophosphatidic acid receptor 1 [Source:MGI Symbol;Acc:MGI:108429]                                                                 |        | 4,487529187 | 1,10244863 | <b>2,14718818</b> | 2,20921087 | 11,1671949 | 0,000832584   | 0,004380892 | protein_coding       |
| ENSMUSG00000021451  | Sema4d        | sema domain, immunoglobulin domain (Ig), transmembrane domain (TM) and short cytoplasmic domain, (semaphorin) 4                     |        | 422,2782026 | 1,09791961 | <b>2,14045812</b> | 6,93420368 | 40,7805414 | 1,70321E-10   | 3,66206E-09 | protein_coding       |
| ENSMUSG00000056602  | Fry           | furry homolog (Drosophila) [Source:MGI Symbol;Acc:MGI:2443895]                                                                      |        | 4,107802395 | 1,09571924 | <b>2,13639622</b> | 2,03038231 | 11,2538131 | 0,000794596   | 0,004209367 | protein_coding       |
| ENSMUSG00000002489  | Tiam1         | T cell lymphoma invasion and metastasis 1 [Source:MGI Symbol;Acc:MGI:103306]                                                        |        | 15,24292854 | 1,09417938 | <b>2,13491611</b> | 3,93021111 | 25,317862  | 4,86186E-07   | 5,58757E-06 | protein_coding       |
| ENSMUSG00000073274  | Gm14636       | predicted gene 14636 [Source:MGI Symbol;Acc:MGI:3641976]                                                                            |        | 2,044746098 | 1,09373617 | <b>2,13426034</b> | 1,03729186 | 6,50019257 | 0,010786281   | 0,038633996 | lincRNA              |
| ENSMUSG00000049676  | Catsperg1     | cation channel, sperm-associated, gamma 1 [Source:MGI Symbol;Acc:MGI:2443617]                                                       |        | 2,945687446 | 1,0922219  | <b>2,13202137</b> | 1,53847089 | 9,65164762 | 0,001891818   | 0,00892914  | protein_coding       |
| ENSMUSG00000056888  | Glipr1        | GLI pathogenesis-related 1 (glioma) [Source:MGI Symbol;Acc:MGI:1920940]                                                             |        | 222,151258  | 1,09151726 | <b>2,13098031</b> | 7,79622271 | 27,6265976 | 1,47142E-07   | 1,85183E-06 | protein_coding       |
| ENSMUSG00000035158  | Mif           | microphthalmia-associated transcription factor [Source:MGI Symbol;Acc:MGI:104554]                                                   |        | 72,38912198 | 1,09055609 | <b>2,12956104</b> | 6,18127746 | 56,1774134 | 6,62179E-14   | 2,35448E-12 | protein_coding       |
| ENSMUSG00000005802  | Slc30a4       | solute carrier family 30 (zinc transporter), member 4 [Source:MGI Symbol;Acc:MGI:1345282]                                           |        | 10,00961969 | 1,0901861  | <b>2,12901498</b> | 3,33146919 | 20,3240954 | 6,53721E-06   | 5,9359E-05  | protein_coding       |
| ENSMUSG00000029822  | Osbpl3        | oxysterol binding protein-like 3 [Source:MGI Symbol;Acc:MGI:1918970]                                                                |        | 11,73418245 | 1,08818709 | <b>2,12606703</b> | 3,5600664  | 21,9635935 | 2,77827E-06   | 2,74302E-05 | protein_coding       |
| ENSMUSG00000036353  | P2ry12        | purinergic receptor P2Y, G-protein coupled 12 [Source:MGI Symbol;Acc:MGI:1918089]                                                   |        | 1,791112427 | 1,08795641 | <b>2,12572447</b> | 0,85997419 | 6,39763435 | 0,011427253   | 0,004549959 | protein_coding       |
| ENSMUSG00000022305  | Lrp12         | low density lipoprotein-related protein 12 [Source:MGI Symbol;Acc:MGI:2443132]                                                      |        | 68,43469114 | 1,08681225 | <b>2,12404193</b> | 6,09938297 | 39,6995596 | 2,96192E-10   | 6,17508E-09 | protein_coding       |
| ENSMUSG00000029392  | Rilpl1        | Rab interacting lysosomal protein-like 1 [Source:MGI Symbol;Acc:MGI:1922945]                                                        |        | 5,553994359 | 1,08668072 | <b>2,12338483</b> | 2,49115773 | 13,9382642 | 0,000188913   | 0,001194241 | protein_coding       |
| ENSMUSG00000040829  | Zmynd15       | zinc finger, MYND-type containing 15 [Source:MGI Symbol;Acc:MGI:3603821]                                                            |        | 12,92829515 | 1,08631752 | <b>2,1231368</b>  | 3,70059338 | 30,4039685 | 3,5081E-08    | 5,09161E-07 | protein_coding       |
| ENSMUSG00000036620  | Mgat4b        | mannoside acetylglucosaminyltransferase 4, isoenzyme B [Source:MGI Symbol;Acc:MGI:2143974]                                          |        | 72,48174107 | 1,08528085 | <b>2,12178849</b> | 6,18103081 | 46,0616794 | 1,14588E-11   | 2,9143E-10  | protein_coding       |
| ENSMUSG00000029781  | Fkbp9         | FK506 binding protein 9 [Source:MGI Symbol;Acc:MGI:1350921]                                                                         |        | 5,426384615 | 1,08520754 | <b>2,12180868</b> | 2,46333475 | 8,86547813 | 0,002906141   | 0,012864534 | protein_coding       |
| ENSMUSG00000015340  | Cybb          | cytochrome b-245, beta polypeptide [Source:MGI Symbol;Acc:MGI:88574]                                                                |        | 524,1290028 | 1,08498573 | <b>2,1213545</b>  | 9,03448565 | 40,2072937 | 2,28394E-10   | 4,84433E-09 | protein_coding       |
| ENSMUSG00000015396  | Cd83          | CD83 antigen [Source:MGI Symbol;Acc:MGI:1328316]                                                                                    |        | 32,37820232 | 1,08433597 | <b>2,1203993</b>  | 5,02831267 | 45,5355551 | 1,49893E-11   | 3,77724E-10 | protein_coding       |
| ENSMUSG00000021756  | Il6st         | interleukin 6 signal transducer [Source:MGI Symbol;Acc:MGI:96560]                                                                   |        | 28,68757016 | 1,08065382 | <b>2,11499437</b> | 4,85183075 | 37,5239237 | 9,02896E-10   | 7,11645E-08 | protein_coding       |
| ENSMUSG00000074677  | Sirpb1c       | signal-regulatory protein beta 1C [Source:MGI Symbol;Acc:MGI:3807521]                                                               |        | 28,92439944 | 1,07713612 | <b>2,10984369</b> | 4,86301514 | 36,2801746 | 1,70893E-09   | 3,11378E-08 | protein_coding       |
| ENSMUSG00000024242  | Map4k3        | mitogen-activated protein kinase kinase kinase kinase 3 [Source:MGI Symbol;Acc:MGI:2154405]                                         |        | 48,14692796 | 1,07646395 | <b>2,10886091</b> | 5,59103826 | 41,1790971 | 1,389E-10     | 3,02642E-09 | protein_coding       |
| ENSMUSG00000022114  | Spry2         | sprouty homolog 2 (Drosophila) [Source:MGI Symbol;Acc:MGI:1345138]                                                                  |        | 4,770772812 | 1,07339986 | <b>2,10438673</b> | 2,26966052 | 10,1333353 | 0,001456117   | 0,007113542 | protein_coding       |
| ENSMUSG00000022221  | Ripk3         | receptor-interacting serine-threonine kinase 3 [Source:MGI Symbol;Acc:MGI:2154952]                                                  |        | 30,29232672 | 1,07017359 | <b>2,099686</b>   | 4,93181904 | 46,0963831 | 1,12576E-11   | 2,86978E-10 | protein_coding       |
| ENSMUSG00000033307  | Mif           | macrophage migration inhibitory factor [Source:MGI Symbol;Acc:MGI:96982]                                                            |        | 107,0015009 | 1,06805457 | <b>2,09660426</b> | 6,7432995  | 40,868979  | 2,42913E-10   | 5,12262E-09 | protein_coding       |
| ENSMUSG00000029561  | Oas12         | 2'-5' oligoadenylate synthetase-like 2 [Source:MGI Symbol;Acc:MGI:1344390]                                                          |        | 135,7627169 | 1,06804485 | <b>2,09659013</b> | 7,08607644 | 41,7738259 | 1,02466E-10   | 2,26063E-09 | protein_coding       |
| ENSMUSG00000012519  | Mkl1          | mixed lineage kinase domain-like [Source:MGI Symbol;Acc:MGI:1921818]                                                                |        | 26,5735369  | 1,06671303 | <b>2,09465555</b> | 4,73887068 | 28,0472537 | 1,18389E-07   | 1,53389E-06 | protein_coding       |
| ENSMUSG00000047959  | Kcna3         | potassium voltage-gated channel, shaker-related subfamily, member 3 [Source:MGI Symbol;Acc:MGI:96660]                               |        | 3,237371736 | 1,0661014  | <b>2,09367773</b> | 1,7213886  | 7,59824928 | 0,005842501   | 0,02314043  | protein_coding       |
| ENSMUSG00000015745  | Plekho1       | pleckstrin homology domain containing, family O member 1 [Source:MGI Symbol;Acc:MGI:1914470]                                        |        | 108,0963892 | 1,06528278 | <b>2,09258</b>    | 6,75683728 | 50,0750478 | 1,47977E-12   | 4,31252E-11 | protein_coding       |
| ENSMUSG00000022562  | Oplah         | 5-oxoprolinase (ATP-hydrolyzing) [Source:MGI Symbol;Acc:MGI:1922725]                                                                |        | 3,753795807 | 1,06470597 | <b>2,09174353</b> | 1,91578942 | 9,65177761 | 0,001891684   | 0,00892914  | protein_coding       |
| ENSMUSG000000082016 | Pgam1-ps2     | phosphoglycerate mutase 1, pseudogene 2 [Source:MGI Symbol;Acc:MGI:3645709]                                                         |        | 81,46243298 | 1,06353657 | <b>2,09004871</b> | 6,35729358 | 42,6431571 | 6,56938E-11   | 1,51316E-09 | pseudogene           |
| ENSMUSG00000073678  | Pgap1         | post-GPI attachment to proteins 1 [Source:MGI Symbol;Acc:MGI:2443342]                                                               |        | 29,60828501 | 1,06251607 | <b>2,08857083</b> | 4,89236131 | 34,6786569 | 3,88872E-09   | 6,62408E-08 | protein_coding       |
| ENSMUSG00000015501  | Hivp2         | human immunodeficiency virus type 1 enhancer binding protein 2 [Source:MGI Symbol;Acc:MGI:1338076]                                  |        | 34,80057883 | 1,06245972 | <b>2,08848926</b> | 5,13464434 | 55,0775103 | 1,15869E-13   | 9,97829E-12 | protein_coding       |
| ENSMUSG00000033161  | Atp1a1        | ATPase, Na+/K+ transporting, alpha 1 polypeptide [Source:MGI Symbol;Acc:MGI:88105]                                                  |        | 433,2406117 | 1,06205865 | <b>2,08790874</b> | 8,75943868 | 33,8385027 | 5,98819E-09   | 3,98391E-08 | protein_coding       |
| ENSMUSG00000052688  | 5430435G22Rik | RIKEN cDNA 5430435G22 gene [Source:MGI Symbol;Acc:MGI:2442295]                                                                      |        | 122,9831732 | 1,06038486 | <b>2,08548777</b> | 7,05688159 | 32,780033  | 1,03199E-08   | 1,63852E-07 | protein_coding       |
| ENSMUSG00000029098  | Acox3         | acyl-Coenzyme A oxidase 3, pristanoyl [Source:MGI Symbol;Acc:MGI:1933156]                                                           |        | 54,26720872 | 1,05920014 | <b>2,08377592</b> | 5,762402   | 50,8376196 | 1,00332E-12   | 2,95536E-11 | protein_coding       |
| ENSMUSG00000023249  | Parp3         | poly (ADP-ribose) polymerase family, member 3 [Source:MGI Symbol;Acc:MGI:1891258]                                                   |        | 26,18848729 | 1,05865993 | <b>2,0829958</b>  | 4,71150464 | 37,3492821 | 9,87572E-10   | 1,86434E-08 | protein_coding       |
| ENSMUSG00000030530  | Furin         | furin (paired basic amino acid cleaving enzyme) [Source:MGI Symbol;Acc:MGI:97513]                                                   |        | 85,11028469 | 1,05825689 | <b>2,08241396</b> | 6,41150489 | 57,9181889 | 2,73249E-14   | 1,02464E-12 | protein_coding       |
| ENSMUSG00000033871  | Pparg1b       | peroxisome proliferative activated receptor, gamma, coactivator 1 beta [Source:MGI Symbol;Acc:MGI:2444934]                          |        | 4,182010383 | 1,05554097 | <b>2,07849744</b> | 2,10797095 | 9,52184447 | 0,002030404   | 0,009492787 | protein_coding       |
| ENSMUSG00000097242  |               |                                                                                                                                     |        | 4,197626292 | 1,05224168 | <b>2,07374956</b> | 2,06534779 | 10,2235737 | 0,001386569</ |             |                      |

|                    |               |                                                                                                                          |        |             |            |                   |            |            |              |              |                |
|--------------------|---------------|--------------------------------------------------------------------------------------------------------------------------|--------|-------------|------------|-------------------|------------|------------|--------------|--------------|----------------|
| ENSMUSG00000036825 | Ssx2ip        | synovial sarcoma, X breakpoint 2 interacting protein [Source:MGI Symbol;Acc:MGI:2139150]                                 | Sheet1 | 6,528333761 | 1,04471507 | <b>2,06295889</b> | 2,72763882 | 14,8768834 | 0,000114761  | 0,000769766  | protein_coding |
| ENSMUSG00000020100 | Slc29a3       | solute carrier family 29 (nucleoside transporters), member 3 [Source:MGI Symbol;Acc:MGI:1918529]                         |        | 63,55333014 | 1,04428579 | <b>2,06234513</b> | 5,99252751 | 49,3276605 | 2,16587E-12  | 6,21316E-11  | protein_coding |
| ENSMUSG00000015243 | Abca1         | ATP-binding cassette, sub-family A (ABC1), member 1 [Source:MGI Symbol;Acc:MGI:99607]                                    |        | 669,4807427 | 1,04388725 | <b>2,0617755</b>  | 9,38689897 | 35,656882  | 2,35315E-09  | 4,18351E-08  | protein_coding |
| ENSMUSG00000038539 | Atf5          | activating transcription factor 5 [Source:MGI Symbol;Acc:MGI:2141857]                                                    |        | 75,49339502 | 1,0408161  | <b>2,05739114</b> | 6,23582047 | 51,507823  | 7,13124E-13  | 2,1466E-11   | protein_coding |
| ENSMUSG00000043664 | Tmem221       | transmembrane protein 221 [Source:MGI Symbol;Acc:MGI:3525074]                                                            |        | 7,146604013 | 1,04061523 | <b>2,05710471</b> | 2,84162236 | 16,0268467 | 6,24506E-05  | 0,000450522  | protein_coding |
| ENSMUSG00000078875 | Gm14419       | predicted gene 14419 [Source:MGI Symbol;Acc:MGI:3702410]                                                                 |        | 2,306656514 | 1,04049911 | <b>2,05693914</b> | 1,21079035 | 6,02271012 | 0,014122943  | 0,0047891598 | protein_coding |
| ENSMUSG00000043391 | 2510009E07Rik | RIKEN cDNA 2510009E07 gene [Source:MGI Symbol;Acc:MGI:1919440]                                                           |        | 53,81268749 | 1,03983077 | <b>2,05598647</b> | 5,75790747 | 41,8003649 | 1,01085E-10  | 2,23464E-09  | protein_coding |
| ENSMUSG00000031762 | Mt2           | metallothionein 2 [Source:MGI Symbol;Acc:MGI:97172]                                                                      |        | 32,49590382 | 1,03645797 | <b>2,0511885</b>  | 5,02846956 | 27,4674726 | 1,59759E-07  | 1,99463E-06  | protein_coding |
| ENSMUSG00000022802 | Lmln          | leishmanolysin-like (metallopeptidase M8 family) [Source:MGI Symbol;Acc:MGI:2444736]                                     |        | 3,997606204 | 1,03600912 | <b>2,05054744</b> | 2,0079481  | 10,3831945 | 0,001271675  | 0,006310701  | protein_coding |
| ENSMUSG00000032567 | Aste1         | asteroid homolog 1 (Drosophila) [Source:MGI Symbol;Acc:MGI:1913845]                                                      |        | 4,423933305 | 1,03317667 | <b>2,04652554</b> | 2,14689331 | 9,72990328 | 0,00181294   | 0,008652813  | protein_coding |
| ENSMUSG00000061589 | Dot1l         | DOT1-like, histone H3 methyltransferase (S. cerevisiae) [Source:MGI Symbol;Acc:MGI:2143886]                              |        | 106,0199222 | 1,03294732 | <b>2,04620023</b> | 6,72827549 | 38,8596787 | 4,5539E-10   | 9,21432E-09  | protein_coding |
| ENSMUSG00000023473 | Celsr3        | cadherin, EGF LAG seven-pass G-type receptor 3 (flamingo homolog, Drosophila) [Source:MGI Symbol;Acc:MGI:18582]          |        | 5,083559175 | 1,03200749 | <b>2,04486767</b> | 2,34865823 | 12,2296749 | 0,000470354  | 0,002665177  | protein_coding |
| ENSMUSG00000025212 | Sfnx3         | sideroflexin 3 [Source:MGI Symbol;Acc:MGI:2137679]                                                                       |        | 39,61454635 | 1,03170025 | <b>2,04443224</b> | 5,31062061 | 36,2145604 | 1,76745E-09  | 3,21506E-08  | protein_coding |
| ENSMUSG00000042210 | Abhd14a       | abhydrolase domain containing 14A [Source:MGI Symbol;Acc:MGI:1915894]                                                    |        | 3,140169702 | 1,03165534 | <b>2,04436861</b> | 1,68883041 | 7,74358596 | 0,005390365  | 0,021590938  | protein_coding |
| ENSMUSG00000007867 | Ift43         | intraflagellar transport 43 homolog (Chlamydomonas) [Source:MGI Symbol;Acc:MGI:1923661]                                  |        | 3,590715674 | 1,03083542 | <b>2,04320707</b> | 1,85554388 | 8,09263694 | 0,00444545   | 0,018323533  | protein_coding |
| ENSMUSG00000039195 | 1110008P14Rik | RIKEN cDNA 1110008P14 gene [Source:MGI Symbol;Acc:MGI:1920987]                                                           |        | 11,53396215 | 1,02670787 | <b>2,03736981</b> | 3,52867059 | 21,5733538 | 3,4055E-06   | 3,30754E-05  | protein_coding |
| ENSMUSG00000074158 | 9830147E19Rik | RIKEN cDNA 9830147E19 gene [Source:MGI Symbol;Acc:MGI:3036263]                                                           |        | 3,762899521 | 1,02647209 | <b>2,03703687</b> | 5,6610879  | 8,93344685 | 0,002799955  | 0,0015459741 | protein_coding |
| ENSMUSG00000028803 | Nipal3        | NIPA-like domain containing 3 [Source:MGI Symbol;Acc:MGI:1921802]                                                        |        | 12,19779898 | 1,02645891 | <b>2,03701826</b> | 3,62495851 | 26,0543555 | 3,31939E-07  | 3,91731E-06  | protein_coding |
| ENSMUSG00000046798 | Cldn12        | claudin 12 [Source:MGI Symbol;Acc:MGI:1929288]                                                                           |        | 3,572319627 | 1,02509861 | <b>2,03509848</b> | 1,85574875 | 8,67178342 | 0,0003231748 | 0,014067833  | protein_coding |
| ENSMUSG00000042363 | Lgalsl        | lectin, galactoside binding-like [Source:MGI Symbol;Acc:MGI:1916114]                                                     |        | 3,3865265   | 1,02029053 | <b>2,03832738</b> | 1,77599677 | 7,7329255  | 0,005422282  | 0,021710866  | protein_coding |
| ENSMUSG00000078247 | Airm          | antisense lgr7 RNA [Source:MGI Symbol;Acc:MGI:1353471]                                                                   |        | 3,965860811 | 1,01755242 | <b>2,02448145</b> | 2,00508723 | 8,37512115 | 0,003803922  | 0,016153149  | antisense      |
| ENSMUSG00000025647 | Shisa5        | shisa homolog 5 (Xenopus laevis) [Source:MGI Symbol;Acc:MGI:1915044]                                                     |        | 203,4451707 | 1,01707141 | <b>2,02380658</b> | 7,66964328 | 37,7040341 | 8,23341E-10  | 1,57872E-08  | protein_coding |
| ENSMUSG00000035168 | Tanc1         | tetratricopeptide repeat, ankyrin repeat and coiled-coil containing 1 [Source:MGI Symbol;Acc:MGI:1914110]                |        | 19,78276114 | 1,01699413 | <b>2,02369817</b> | 4,30954432 | 26,3010762 | 2,92126E-07  | 3,50009E-06  | protein_coding |
| ENSMUSG00000074417 | Gm14548       | predicted gene 14548 [Source:MGI Symbol;Acc:MGI:3709645]                                                                 |        | 6,37029061  | 1,01680108 | <b>2,02342739</b> | 5,67348858 | 9,85902718 | 0,001690004  | 0,008136757  | protein_coding |
| ENSMUSG00000037960 | 1110007C09Rik | RIKEN cDNA 1110007C09 gene [Source:MGI Symbol;Acc:MGI:1915730]                                                           |        | 52,16056571 | 1,01553159 | <b>2,02164767</b> | 5,70577555 | 39,9453007 | 2,61175E-10  | 5,48668E-09  | protein_coding |
| ENSMUSG00000037110 | Ralgapa2      | Ral GTPase activating protein, alpha subunit 2 (catalytic) [Source:MGI Symbol;Acc:MGI:3036245]                           |        | 36,98429191 | 1,0137633  | <b>2,01917129</b> | 5,2170685  | 27,8185363 | 1,33243E-07  | 1,70623E-06  | protein_coding |
| ENSMUSG00000050914 | Ankrp37       | ankyrin repeat domain 37 [Source:MGI Symbol;Acc:MGI:3603344]                                                             |        | 2,758835962 | 1,01295622 | <b>2,01804203</b> | 1,48107873 | 6,31370366 | 0,011980831  | 0,04214966   | protein_coding |
| ENSMUSG00000026107 | Nabp1         | nucleic acid binding protein 1 [Source:MGI Symbol;Acc:MGI:1923258]                                                       |        | 30,01981436 | 1,01205002 | <b>2,01677483</b> | 4,91432257 | 28,7672665 | 8,1619E-08   | 1,08961E-06  | protein_coding |
| ENSMUSG00000039982 | Dtx4          | deltex 4 homolog (Drosophila) [Source:MGI Symbol;Acc:MGI:2672905]                                                        |        | 55,52540035 | 1,01075021 | <b>2,01495861</b> | 5,79884703 | 29,9405338 | 4,45502E-08  | 3,61577E-07  | protein_coding |
| ENSMUSG00000038175 | Myliip        | myosin regulatory light chain interacting protein [Source:MGI Symbol;Acc:MGI:2388271]                                    |        | 75,09433008 | 1,0058291  | <b>2,00775456</b> | 6,23089603 | 52,9818785 | 3,3664E-13   | 1,63898E-11  | protein_coding |
| ENSMUSG00000037966 | Ninj1         | ninjurin 1 [Source:MGI Symbol;Acc:MGI:1196617]                                                                           |        | 166,8411989 | 1,00406689 | <b>2,00564586</b> | 7,38347775 | 39,7528996 | 2,88212E-10  | 6,02013E-09  | protein_coding |
| ENSMUSG00000007891 | Ctsd          | cathepsin D [Source:MGI Symbol;Acc:MGI:88562]                                                                            |        | 5035,457245 | 1,00107008 | <b>2,00148399</b> | 12,2979203 | 11,5616972 | 0,000673244  | 0,003645603  | protein_coding |
| ENSMUSG00000035637 | Grhpr         | glyoxylate reductase/hydroxypyruvate reductase [Source:MGI Symbol;Acc:MGI:1923488]                                       |        | 3,356194158 | 1,00088205 | <b>2,00122315</b> | 1,7466402  | 8,00273115 | 0,004670685  | 0,019098182  | protein_coding |
| ENSMUSG00000021360 | Gont2         | glucosaminyl (N-acetyl) transferase 2, I-branching enzyme [Source:MGI Symbol;Acc:MGI:1100870]                            |        | 2,192652156 | 0,9996133  | <b>1,999464</b>   | 1,15539284 | 6,15156227 | 0,013129607  | 0,045277775  | protein_coding |
| ENSMUSG00000020782 | Lig12         | lethal giant larvae homolog 2 (Drosophila) [Source:MGI Symbol;Acc:MGI:1918843]                                           |        | 4,076187646 | 0,9995698  | <b>1,9994037</b>  | 2,02751128 | 8,7356182  | 0,003120533  | 0,013681292  | protein_coding |
| ENSMUSG00000027002 | Nckap1        | NCK-associated protein 1 [Source:MGI Symbol;Acc:MGI:1355333]                                                             |        | 6,436467719 | 0,99929828 | <b>1,99902744</b> | 2,70551676 | 9,45517738 | 0,002105539  | 0,009802356  | protein_coding |
| ENSMUSG00000070427 | I18bp         | interleukin 18 binding protein [Source:MGI Symbol;Acc:MGI:1333800]                                                       |        | 9,996606257 | 0,99873094 | <b>1,99824149</b> | 3,27896255 | 13,4599005 | 0,000243717  | 0,001491763  | protein_coding |
| ENSMUSG00000031521 | Aga           | aspartylglucosaminidase [Source:MGI Symbol;Acc:MGI:1048731]                                                              |        | 24,2272612  | 0,9982016  | <b>1,99750843</b> | 4,60664106 | 28,7953215 | 8,04552E-08  | 1,07655E-06  | protein_coding |
| ENSMUSG00000066595 | Mfsd7b        | major facilitator superfamily domain containing 7B [Source:MGI Symbol;Acc:MGI:2444881]                                   |        | 42,01245936 | 0,99647511 | <b>1,99511943</b> | 5,3968511  | 29,0878505 | 6,91694E-08  | 9,44055E-07  | protein_coding |
| ENSMUSG00000036181 | Hist1h1c      | histone cluster 1, H1c [Source:MGI Symbol;Acc:MGI:1931526]                                                               |        | 63,20629476 | 0,9959194  | <b>1,99435107</b> | 5,98264019 | 54,9304652 | 1,2487E-13   | 4,20844E-12  | protein_coding |
| ENSMUSG00000028970 | Abcb1b        | ATP-binding cassette, sub-family B (MDR/TAP), member 1B [Source:MGI Symbol;Acc:MGI:97568]                                |        | 18,55538609 | 0,99479495 | <b>1,99279727</b> | 4,21796421 | 18,1052431 | 2,08075E-05  | 0,000169738  | protein_coding |
| ENSMUSG00000058056 | Palld         | palladin, cytoskeletal associated protein [Source:MGI Symbol;Acc:MGI:1919583]                                            |        | 9,366787296 | 0,9947003  | <b>1,99266654</b> | 3,23439578 | 12,5027351 | 0,000406357  | 0,002341185  | protein_coding |
| ENSMUSG00000042272 | Sestd1        | SEC14 and spectrin domains 1 [Source:MGI Symbol;Acc:MGI:1916262]                                                         |        | 43,96652686 | 0,9945451  | <b>1,99260329</b> | 5,46245018 | 29,1881676 | 6,56791E-08  | 8,99771E-07  | protein_coding |
| ENSMUSG00000041440 | Gk5           | glycerol kinase 5 (putative) [Source:MGI Symbol;Acc:MGI:2443336]                                                         |        | 3,035296728 | 0,99431806 | <b>1,99213865</b> | 1,60995224 | 8,01463867 | 0,004640073  | 0,019036775  | protein_coding |
| ENSMUSG00000026811 | St6galnac6    | ST6 (alpha-N-acetyl-neuraminyl-2,3-beta-galactosyl-1,3)-N-acetylglucosaminidase alpha-2,6-sialyltransferase 6 [Source:2] |        | 24,11068047 | 0,99414571 | <b>1,99190067</b> | 4,59801365 | 36,0563012 | 1,91698E-09  | 3,46412E-08  | protein_coding |
| ENSMUSG00000033446 | Lpar6         | lysophosphatidic acid receptor 6 [Source:MGI Symbol;Acc:MGI:1914418]                                                     |        | 21,41979969 | 0,99355283 | <b>1,99108227</b> | 4,42194365 | 34,8159971 | 3,62384E-09  | 6,19208E-08  | protein_coding |
| ENSMUSG00000030231 | Plekha5       | pleckstrin homology domain containing, family A member 5 [Source:MGI Symbol;Acc:MGI:1923802]                             |        | 2,413068711 | 0,99350405 | <b>1,99101495</b> | 1,29974475 | 7,13293937 | 0,007568056  | 0,028761755  | protein_coding |
| ENSMUSG00000069206 | Zfp874a       | zinc finger protein 874a [Source:MGI Symbol;Acc:MGI:3040703]                                                             |        | 7,609519648 | 0,98972077 | <b>1,98580061</b> | 2,93933607 | 11,5111363 | 0,000691805  | 0,003727738  | protein_coding |
| ENSMUSG00000020184 | Mdm2          | transformed mouse 3T3 cell double minute 2 [Source:MGI Symbol;Acc:MGI:96952]                                             |        | 209,3593302 | 0,98866274 | <b>1,98434481</b> | 7,71085338 | 32,9270443 | 9,56829E-09  | 1,52801E-07  | protein_coding |
| ENSMUSG00000051790 | Nlgn2         | neuroligin 2 [Source:MGI Symbol;Acc:MGI:2681835]                                                                         |        | 10,27342578 | 0,98801093 | <b>1,98344849</b> | 3,3583918  | 17,5597622 | 2,78418E-05  | 0,000218031  | protein_coding |
| ENSMUSG00000020635 | Fkbp1b        | FK506 binding protein 1b [Source:MGI Symbol;Acc:MGI:1336205]                                                             |        | 5,615343495 | 0,98769593 | <b>1,98301547</b> | 2,49601097 | 11,670269  | 0,000635068  | 0,003459343  | protein_coding |
| ENSMUSG00000025330 | Padi4         | peptidyl arginine deiminase, type IV [Source:MGI Symbol;Acc:MGI:1338898]                                                 |        | 7,145217349 | 0,98750004 | <b>1,97224623</b> | 2,83516693 | 14,1424919 | 0,000169472  | 0,001084297  | protein_coding |
| ENSMUSG00000018932 | Map2k3        | mitogen-activated protein kinase kinase 3 [Source:MGI Symbol;Acc:MGI:1346868]                                            |        | 64,19161138 | 0,98731744 | <b>1,98249529</b> | 6,00705193 | 44,1242139 | 3,08185E-11  | 7,40925E-10  | protein_coding |
| ENSMUSG00000019796 | Lrp11         | low density lipoprotein receptor-related protein 11 [Source:MGI Symbol;Acc:MGI:2442989]                                  |        | 11,04508716 | 0,98647722 | <b>1,98134103</b> | 3,47702102 | 20,7376385 | 5,26705E-06  | 4,9E-05      | protein_coding |
| ENSMUSG00000026558 | Uck2          | uridine-cytidine kinase 2 [Source:MGI Symbol;Acc:MGI:1931744]                                                            |        | 5,698471924 | 0,98483026 | <b>1,97980845</b> | 2,52983599 | 11,8360678 | 0,000580944  | 0,003199413  | protein_coding |
| ENSMUSG00000033249 | Hsf4          | heat shock transcription factor 4 [Source:MGI Symbol;Acc:MGI:1347058]                                                    |        | 4,150304269 | 0,98423855 | <b>1,97869692</b> | 2,03393666 | 6,38854722 | 0,003775926  | 0,016067427  | protein_coding |
| ENSMUSG00000023045 | Soat2         | sterol O-acetyltransferase 2 [Source:MGI Symbol;Acc:MGI:1332226]                                                         |        | 2,899780951 | 0,98399624 | <b>1,97793668</b> | 1,52236043 | 6,5144752  | 0,00699989   | 0,038395162  | protein_coding |
| ENSMUSG00000035202 | Lars2         | leucyl-tRNA synthetase, mitochondrial [Source:MGI Symbol;Acc:MGI:2142973]                                                |        | 126,19837   | 0,98260712 | <b>1,97603311</b> | 6,98277914 | 19,8198104 | 8,50961E-06  | 7,52779E-05  | protein_coding |
| ENSMUSG00000024899 | Papss2        | 3'-phosphoadenosine 5'-phosphosulfate synthase 2 [Source:MGI Symbol;Acc:MGI:1330223]                                     |        | 4,869867612 | 0,98062112 | <b>1,9733148</b>  | 2,30886856 | 7,62488253 | 0,005756842  | 0,02834087   | protein_coding |
| ENSMUSG00000034485 | Uaca          | uveal autoantigen with coiled-coil domains and ankyrin repeats [Source:MGI Symbol;Acc:MGI:1919815]                       |        | 6,512648709 | 0,97981395 | <b>1,97221106</b> | 2,71824757 | 8,25961187 | 0,004053679  | 0,017012137  | protein_coding |
| ENSMUSG00000053580 | Tanc2         | tetratricopeptide repeat, ankyrin repeat and coiled-coil containing 2 [Source:MGI Symbol;Acc:MGI:2444121]                |        | 55,91234531 | 0,97967059 | <b>1,97201509</b> | 5,81111833 | 35,5540784 | 2,48067E-09  | 4,37482E-08  | protein_coding |
| ENSMUSG00000068923 | Syt11         | synaptotagmin XI [Source:MGI Symbol;Acc:MGI:1859547]                                                                     |        | 12,21490436 | 0,97912828 | <b>1,97127394</b> | 3,61913753 | 17,0078638 | 3,72253E-05  | 0,000281289  | protein_coding |
| ENSMUSG00000070056 | Mfhas1        | malignant fibrous histiocytoma amplified sequence 1 [Source:MGI Symbol;Acc:MGI:1098644]                                  |        | 36,75664224 | 0,9763153  | <b>1,96743408</b> | 5,20315449 | 39,7859785 | 2,83372E-10  | 5,9303E-09   | protein_coding |
| ENSMUSG00000040061 | Ptcb2         | phospholipase C, beta 2 [Source:MGI Symbol;Acc:MGI:107465]                                                               |        | 33,79460869 | 0,97603314 | <b>1,96704934</b> | 5,07886253 | 35,4582384 | 2,60578E-09  | 4,58075E-08  | protein_coding |
| ENSMUSG00000009073 | Nf2           | neurofibromatosis 2 [Source:MGI Symbol;Acc:MGI:97307]                                                                    |        | 111,047077  | 0,97180035 | <b>1,96128658</b> | 6,79571628 | 40,343188  | 2,13047E-10  | 4,55398E-0   |                |

|                     |               |                                                                                                                     |  |        |              |            |                   |            |            |              |             |                   |
|---------------------|---------------|---------------------------------------------------------------------------------------------------------------------|--|--------|--------------|------------|-------------------|------------|------------|--------------|-------------|-------------------|
| ENSMUSG00000078122  | F630028O10Rik | RIKEN cDNA F630028O10 gene [Source:MGI Symbol;Acc:MGI:3641813]                                                      |  | Sheet1 | 8,668878046  | 0,96579124 | <b>1,95313442</b> | 3,1226356  | 14,2442157 | 0,000160553  | 0,001034605 | antisense         |
| ENSMUSG00000030545  | Pex11a        | peroxisomal biogenesis factor 11 alpha [Source:MGI Symbol;Acc:MGI:1338788]                                          |  |        | 5,733082604  | 0,965022   | <b>1,95209329</b> | 2,54167106 | 11,2888507 | 0,000779739  | 0,004146658 | protein_coding    |
| ENSMUSG00000027999  | Pla2g12a      | phospholipase A2, group XIIA [Source:MGI Symbol;Acc:MGI:1913600]                                                    |  |        | 11,81103122  | 0,96483626 | <b>1,95184198</b> | 3,56351015 | 20,4809931 | 5,9972E-06   | 5,49552E-05 | protein_coding    |
| ENSMUSG00000027660  | Skil          | SKI-like [Source:MGI Symbol;Acc:MGI:106203]                                                                         |  |        | 135,2863605  | 0,96443702 | <b>1,95130192</b> | 7,08237677 | 47,924435  | 4,43266E-12  | 1,19286E-10 | protein_coding    |
| ENSMUSG00000016526  | Dyrk3         | dual-specificity tyrosine-(Y)-phosphorylation regulated kinase 3 [Source:MGI Symbol;Acc:MGI:1330300]                |  |        | 2,33077551   | 0,96431518 | <b>1,95113713</b> | 1,21018203 | 6,27371958 | 0,012254164  | 0,04291887  | protein_coding    |
| ENSMUSG00000050605  | Zfp61         | zinc finger protein 61 [Source:MGI Symbol;Acc:MGI:99663]                                                            |  |        | 4,8682907316 | 0,96262966 | <b>1,94885892</b> | 2,2921242  | 9,71216581 | 0,001830562  | 0,008714012 | protein_coding    |
| ENSMUSG00000003545  | Fosb          | FBJ osteosarcoma oncogene B [Source:MGI Symbol;Acc:MGI:95575]                                                       |  |        | 2,744593963  | 0,95949094 | <b>1,9446236</b>  | 1,47544365 | 7,03217914 | 0,008005788  | 0,030185171 | protein_coding    |
| ENSMUSG000000053113 | Socs3         | suppressor of cytokine signaling 3 [Source:MGI Symbol;Acc:MGI:1201791]                                              |  |        | 57,5761231   | 0,95940247 | <b>1,94450437</b> | 5,85559866 | 28,9168459 | 7,5553E-08   | 1,02395E-06 | protein_coding    |
| ENSMUSG00000017493  | Igfbp4        | insulin-like growth factor binding protein 4 [Source:MGI Symbol;Acc:MGI:96439]                                      |  |        | 65,94031674  | 0,95922835 | <b>1,94426969</b> | 6,04788309 | 38,4796996 | 5,5326E-10   | 1,08548E-08 | protein_coding    |
| ENSMUSG00000063524  | Eno1          | enolase 1, alpha non-neuron [Source:MGI Symbol;Acc:MGI:95393]                                                       |  |        | 733,2715062  | 0,9583049  | <b>1,94302559</b> | 9,5184665  | 24,2537667 | 8,44418E-07  | 9,36188E-06 | protein_coding    |
| ENSMUSG00000021823  | Vcl           | vinculin [Source:MGI Symbol;Acc:MGI:98927]                                                                          |  |        | 59,05601811  | 0,95816507 | <b>1,94283727</b> | 5,892409   | 27,8666863 | 1,29968E-07  | 1,67209E-06 | protein_coding    |
| ENSMUSG00000058881  | Zfp516        | zinc finger protein 516 [Source:MGI Symbol;Acc:MGI:2443957]                                                         |  |        | 43,24283083  | 0,9579757  | <b>1,94258227</b> | 5,43734182 | 32,0656459 | 1,4905E-08   | 2,30002E-07 | protein_coding    |
| ENSMUSG00000032489  | Kif9          | kinesin family member 9 [Source:MGI Symbol;Acc:MGI:1098237]                                                         |  |        | 2,565535718  | 0,95758559 | <b>1,94205705</b> | 1,3452574  | 6,39928189 | 0,011416653  | 0,040549959 | protein_coding    |
| ENSMUSG00000031722  | Hp            | haptoglobin [Source:MGI Symbol;Acc:MGI:96211]                                                                       |  |        | 12,81388338  | 0,95657719 | <b>1,9407001</b>  | 3,72725879 | 17,7963485 | 2,45855E-05  | 0,000195033 | protein_coding    |
| ENSMUSG00000033033  | Calhm2        | calcium homeostasis modulator 2 [Source:MGI Symbol;Acc:MGI:1919941]                                                 |  |        | 10,90897236  | 0,95537073 | <b>1,93907785</b> | 3,44890179 | 19,6863987 | 9,12485E-06  | 8,00757E-05 | protein_coding    |
| ENSMUSG00000020053  | Igf1          | insulin-like growth factor 1 [Source:MGI Symbol;Acc:MGI:96432]                                                      |  |        | 199,3606232  | 0,95297849 | <b>1,93586519</b> | 7,63936133 | 28,2033512 | 1,092115E-07 | 1,42343E-06 | protein_coding    |
| ENSMUSG00000068854  | Hist2h2be     | histone cluster 2, H2be [Source:MGI Symbol;Acc:MGI:2444841]                                                         |  |        | 2,480953768  | 0,95059141 | <b>1,93266476</b> | 1,33851222 | 6,58259718 | 0,010298053  | 0,023716856 | protein_coding    |
| ENSMUSG00000025234  | Atp10a        | ATPase, class V, type 10A [Source:MGI Symbol;Acc:MGI:1330809]                                                       |  |        | 5,043522762  | 0,9493743  | <b>1,93103498</b> | 2,35264303 | 7,96978566 | 0,004756457  | 0,019398364 | protein_coding    |
| ENSMUSG00000042215  | Bag2          | BCL2-associated athanogene 2 [Source:MGI Symbol;Acc:MGI:1891254]                                                    |  |        | 3,717233999  | 0,94828891 | <b>1,92958274</b> | 1,89885088 | 6,19313452 | 0,012824683  | 0,044416297 | protein_coding    |
| ENSMUSG00000030539  | Sema4b        | sema domain, immunoglobulin domain (Ig), transmembrane domain (TM) and short cytoplasmic domain, (semaphorin) 4     |  |        | 12,72293115  | 0,9481899  | <b>1,92945032</b> | 3,67891645 | 18,107036  | 2,08828E-05  | 0,000169704 | protein_coding    |
| ENSMUSG00000041235  | Chd7          | chromodomain helicase DNA binding protein 7 [Source:MGI Symbol;Acc:MGI:2444748]                                     |  |        | 16,78524049  | 0,94587516 | <b>1,92635709</b> | 4,07775323 | 23,960049  | 9,83556E-07  | 1,07526E-05 | protein_coding    |
| ENSMUSG00000028864  | Hgf           | hepatocyte growth factor [Source:MGI Symbol;Acc:MGI:96079]                                                          |  |        | 11,63996422  | 0,94432769 | <b>1,9249194</b>  | 3,52221276 | 18,3424983 | 1,84544E-05  | 0,0001512   | protein_coding    |
| ENSMUSG00000041439  | Mfsd6         | major facilitator superfamily domain containing 6 [Source:MGI Symbol;Acc:MGI:1922925]                               |  |        | 33,46359911  | 0,94412964 | <b>1,92402779</b> | 5,06567165 | 32,5077509 | 1,18718E-08  | 1,8687E-07  | protein_coding    |
| ENSMUSG00000037552  | Pleckhg2      | pleckstrin homology domain containing, family G (with RhoGef domain) member 2 [Source:MGI Symbol;Acc:MGI:214187]    |  |        | 19,75418298  | 0,94145691 | <b>1,92046665</b> | 4,3161463  | 33,2614283 | 8,05649E-09  | 1,29221E-07 | protein_coding    |
| ENSMUSG00000040479  | Sgms1         | sphingomyelin synthase 1 [Source:MGI Symbol;Acc:MGI:2444110]                                                        |  |        | 25,47980719  | 0,94038702 | <b>1,91904297</b> | 4,67979451 | 26,0646864 | 3,30168E-07  | 3,9006E-06  | protein_coding    |
| ENSMUSG00000027459  | Fam110a       | family with sequence similarity 110, member A [Source:MGI Symbol;Acc:MGI:1921097]                                   |  |        | 8,220582712  | 0,93951686 | <b>1,91788586</b> | 3,03949065 | 14,5379099 | 0,000137367  | 0,0090051   | protein_coding    |
| ENSMUSG00000023809  | Rps6ka2       | ribosomal protein S6 kinase, polypeptide 2 [Source:MGI Symbol;Acc:MGI:1342290]                                      |  |        | 31,67587147  | 0,93950267 | <b>1,91786699</b> | 4,98601546 | 27,6644345 | 1,44291E-07  | 1,82431E-06 | protein_coding    |
| ENSMUSG00000029426  | Scarb2        | scavenger receptor class B, member 2 [Source:MGI Symbol;Acc:MGI:1198458]                                            |  |        | 52,68692059  | 0,93947881 | <b>1,91783527</b> | 5,72301108 | 30,0652946 | 4,17471E-08  | 5,94523E-07 | protein_coding    |
| ENSMUSG00000026547  | Tagln2        | transglutn 2 [Source:MGI Symbol;Acc:MGI:1312985]                                                                    |  |        | 186,9059008  | 0,93518644 | <b>1,91213773</b> | 7,54728623 | 36,5401703 | 1,94552E-09  | 2,73855E-08 | protein_coding    |
| ENSMUSG00000056220  | Pla2g4a       | phospholipase A2, group IVA (cytosolic, calcium-dependent) [Source:MGI Symbol;Acc:MGI:1195256]                      |  |        | 45,6662821   | 0,93443003 | <b>1,91115267</b> | 5,52073856 | 35,2427608 | 2,91062E-09  | 5,03606E-08 | protein_coding    |
| ENSMUSG00000031149  | Praf2         | PRA1 domain family 2 [Source:MGI Symbol;Acc:MGI:1859607]                                                            |  |        | 14,33425621  | 0,93179572 | <b>1,90764897</b> | 3,8535029  | 25,1473063 | 5,31138E-07  | 6,03476E-06 | protein_coding    |
| ENSMUSG00000035107  | Dcbl2d        | discoidin, CUB and LCCL domain containing 2 [Source:MGI Symbol;Acc:MGI:1920629]                                     |  |        | 13,5853788   | 0,93130615 | <b>1,90700173</b> | 3,76922249 | 22,272614  | 1,86666E-06  | 9,1852E-05  | protein_coding    |
| ENSMUSG00000046079  | Lrrc8d        | leucine rich repeat containing 8D [Source:MGI Symbol;Acc:MGI:1922368]                                               |  |        | 75,91637264  | 0,928854   | <b>1,90376315</b> | 6,24836731 | 33,8259034 | 6,0271E-09   | 9,91314E-08 | protein_coding    |
| ENSMUSG00000054150  | 483142619Rik  | RIKEN cDNA 483142619 gene [Source:MGI Symbol;Acc:MGI:2442408]                                                       |  |        | 14,82792669  | 0,92754523 | <b>1,90203689</b> | 3,89321754 | 19,119917  | 1,22757E-05  | 0,00010431  | protein_coding    |
| ENSMUSG00000035239  | Neu3          | neuraminidase 3 [Source:MGI Symbol;Acc:MGI:1355305]                                                                 |  |        | 2,342037719  | 0,9269793  | <b>1,90129093</b> | 1,21979224 | 5,97889078 | 0,014478105  | 0,048899767 | protein_coding    |
| ENSMUSG00000042286  | Stab1         | stabilin 1 [Source:MGI Symbol;Acc:MGI:2178742]                                                                      |  |        | 527,893626   | 0,92657477 | <b>1,90075788</b> | 9,0444874  | 24,8283933 | 6,26675E-07  | 7,05459E-06 | protein_coding    |
| ENSMUSG00000018819  | Lsp1          | lymphocyte specific 1 [Source:MGI Symbol;Acc:MGI:96832]                                                             |  |        | 4,739997203  | 0,92654611 | <b>1,90072012</b> | 2,23269058 | 8,63058824 | 0,000305648  | 0,014355398 | protein_coding    |
| ENSMUSG00000004085  | B230120H2Rik  | RIKEN cDNA B230120H23 gene [Source:MGI Symbol;Acc:MGI:2443258]                                                      |  |        | 22,64750436  | 0,92602725 | <b>1,90027373</b> | 4,50759595 | 19,6055445 | 9,51926E-06  | 8,30723E-05 | protein_coding    |
| ENSMUSG00000044080  | S100a1        | S100 calcium binding protein A1 [Source:MGI Symbol;Acc:MGI:1338917]                                                 |  |        | 23,82933041  | 0,92593115 | <b>1,89991009</b> | 4,57629572 | 20,6250193 | 5,58613E-06  | 5,16189E-05 | protein_coding    |
| ENSMUSG00000022385  | Gtse1         | G two S phase expressed protein 1 [Source:MGI Symbol;Acc:MGI:1352755]                                               |  |        | 11,32790387  | 0,92571372 | <b>1,89962378</b> | 3,51218827 | 10,262379  | 0,001357705  | 0,006686284 | protein_coding    |
| ENSMUSG00000038172  | Tc39b         | tetratricopeptide repeat domain 39B [Source:MGI Symbol;Acc:MGI:1917113]                                             |  |        | 18,14664122  | 0,92529025 | <b>1,89606626</b> | 4,19616479 | 22,934218  | 1,67641E-06  | 1,73761E-05 | protein_coding    |
| ENSMUSG00000074506  | Gm10705       | predicted gene 10705 [Source:MGI Symbol;Acc:MGI:3708678]                                                            |  |        | 12,67544363  | 0,92485922 | <b>1,89498987</b> | 3,67591179 | 8,86829762 | 0,002901656  | 0,012849857 | accessed_pseudoge |
| ENSMUSG00000001700  | Gram3         | GRAM domain containing 3 [Source:MGI Symbol;Acc:MGI:1914815]                                                        |  |        | 7,221318892  | 0,92340578 | <b>1,89568729</b> | 2,87268641 | 12,0811845 | 0,000509332  | 0,002853663 | protein_coding    |
| ENSMUSG00000002602  | Axl           | AXL receptor tyrosine kinase [Source:MGI Symbol;Acc:MGI:1347244]                                                    |  |        | 10,52118047  | 0,92232087 | <b>1,8951616</b>  | 3,42219998 | 9,72380276 | 0,001818968  | 0,008667252 | protein_coding    |
| ENSMUSG00000014444  | Fam38a        | family with sequence similarity 38, member A [Source:MGI Symbol;Acc:MGI:3603204]                                    |  |        | 281,3913263  | 0,92075898 | <b>1,89311097</b> | 8,13694936 | 23,9149758 | 1,00685E-06  | 1,09963E-05 | protein_coding    |
| ENSMUSG00000064267  | Hvcn1         | hydrogen voltage-gated channel 1 [Source:MGI Symbol;Acc:MGI:1921346]                                                |  |        | 133,5715072  | 0,91970735 | <b>1,89173151</b> | 7,06208003 | 31,3022107 | 2,20828E-08  | 3,301E-07   | protein_coding    |
| ENSMUSG00000032661  | Oas3          | 2'-5' oligoadenylate synthetase 3 [Source:MGI Symbol;Acc:MGI:2180850]                                               |  |        | 131,3502024  | 0,9167056  | <b>1,88779957</b> | 7,03843362 | 22,6742865 | 1,91919E-06  | 1,96397E-05 | protein_coding    |
| ENSMUSG00000028874  | Fgr           | Gardner-Rasheed feline sarcoma viral (Fgr) oncogene homolog [Source:MGI Symbol;Acc:MGI:95527]                       |  |        | 18,75382413  | 0,91659458 | <b>1,88765431</b> | 4,24472511 | 28,8691129 | 7,7438E-08   | 1,04394E-06 | protein_coding    |
| ENSMUSG00000069516  | Ly2z          | lysozyme 2 [Source:MGI Symbol;Acc:MGI:96897]                                                                        |  |        | 8025,586036  | 0,91643885 | <b>1,88745056</b> | 12,9704067 | 10,9290084 | 0,000946702  | 0,004895724 | protein_coding    |
| ENSMUSG00000038527  | C1r1          | complement component 1, r subcomponent-like [Source:MGI Symbol;Acc:MGI:2660692]                                     |  |        | 5,140906077  | 0,91544177 | <b>1,88614655</b> | 2,36783845 | 10,4095788 | 0,001256336  | 0,006234776 | protein_coding    |
| ENSMUSG00000017737  | Mmp9          | matrix metalloproteinase 9 [Source:MGI Symbol;Acc:MGI:97011]                                                        |  |        | 21,02930783  | 0,91450959 | <b>1,88492822</b> | 4,44082274 | 30,166446  | 3,9651E-08   | 5,67987E-07 | protein_coding    |
| ENSMUSG000000061232 | H2-K1         | histocompatibility 2, K1, K region [Source:MGI Symbol;Acc:MGI:95904]                                                |  |        | 727,8689558  | 0,91424769 | <b>1,88486608</b> | 9,50721555 | 25,7145087 | 3,9584E-07   | 4,59068E-06 | protein_coding    |
| ENSMUSG00000019986  | Ahi1          | Abelson helper integration site 1 [Source:MGI Symbol;Acc:MGI:87971]                                                 |  |        | 55,09696153  | 0,91051117 | <b>1,87971139</b> | 2,50876073 | 10,7044203 | 0,001068809  | 0,005431548 | protein_coding    |
| ENSMUSG00000022945  | Chaf1b        | chromatin assembly factor 1, subunit B (p60) [Source:MGI Symbol;Acc:MGI:1314881]                                    |  |        | 10,89120623  | 0,91026009 | <b>1,87907948</b> | 3,4497334  | 15,8674385 | 6,79376E-05  | 0,000484381 | protein_coding    |
| ENSMUSG00000035900  | Gram4         | GRAM domain containing 4 [Source:MGI Symbol;Acc:MGI:2676308]                                                        |  |        | 7,324186192  | 0,90886111 | <b>1,87756273</b> | 2,87607939 | 11,9452623 | 0,000547865  | 0,003032441 | protein_coding    |
| ENSMUSG00000027078  | Ube2l6        | ubiquitin-conjugating enzyme E2L 6 [Source:MGI Symbol;Acc:MGI:1914500]                                              |  |        | 50,05403142  | 0,90871491 | <b>1,87737248</b> | 5,65023249 | 27,2717459 | 1,76776E-07  | 2,19462E-06 | protein_coding    |
| ENSMUSG00000021559  | Dapk1         | death associated protein kinase 1 [Source:MGI Symbol;Acc:MGI:1916885]                                               |  |        | 35,20142461  | 0,90699212 | <b>1,87513195</b> | 5,14238609 | 23,853518  | 1,03952E-06  | 1,12706E-05 | protein_coding    |
| ENSMUSG00000035954  | Dock4         | dedicator of cytokinesis 4 [Source:MGI Symbol;Acc:MGI:1918006]                                                      |  |        | 38,54552268  | 0,9059343  | <b>1,87375756</b> | 5,27673967 | 28,8482535 | 7,82765E-08  | 1,05395E-06 | protein_coding    |
| ENSMUSG00000042460  | C1gal1        | core 1 synthase, glycoprotein-N-acetyl-galactosamine 3-beta-galactosyltransferase, 1 [Source:MGI Symbol;Acc:MGI:215 |  |        | 10,09917412  | 0,90210343 | <b>1,86878867</b> | 3,33926739 | 15,5783223 | 7,91569E-05  | 0,000555484 | protein_coding    |
| ENSMUSG00000033669  | Zfp7          | zinc finger protein 7 [Source:MGI Symbol;Acc:MGI:99208]                                                             |  |        | 2,545889217  | 0,90145194 | <b>1,86794495</b> | 1,36368742 | 5,95998095 |              |             |                   |

|                    |               |                                                                                                                      |        |             |            |                   |            |            |             |             |                |
|--------------------|---------------|----------------------------------------------------------------------------------------------------------------------|--------|-------------|------------|-------------------|------------|------------|-------------|-------------|----------------|
| ENSMUSG00000037295 | Ldrlap1       | low density lipoprotein receptor adaptor protein 1 [Source:MGI Symbol;Acc:MGI:2140175]                               | Sheet1 | 67,52922531 | 0,88598644 | <b>1,84802777</b> | 6,07822026 | 27,0443827 | 1,98837E-07 | 2,43548E-06 | protein_coding |
| ENSMUSG00000021939 | Ctsb          | cathepsin B [Source:MGI Symbol;Acc:MGI:88561]                                                                        |        | 7028,320286 | 0,88513148 | <b>1,84693294</b> | 12,7789718 | 9,03479231 | 0,002648891 | 0,011876788 | protein_coding |
| ENSMUSG00000046562 | Unc119b       | unc-119 homolog B (C. elegans) [Source:MGI Symbol;Acc:MGI:2147162]                                                   |        | 12,2140052  | 0,88182688 | <b>1,84270723</b> | 3,62356167 | 17,2481514 | 3,28017E-05 | 0,000251495 | protein_coding |
| ENSMUSG00000024521 | Pmaip1        | phorbol-12-myristate-13-acetate-induced protein 1 [Source:MGI Symbol;Acc:MGI:1930146]                                |        | 24,6704801  | 0,87919944 | <b>1,83935434</b> | 4,63381206 | 21,2137468 | 4,10807E-06 | 3,92482E-05 | protein_coding |
| ENSMUSG00000023259 | Slc26a6       | solute carrier family 26, member 6 [Source:MGI Symbol;Acc:MGI:2159728]                                               |        | 5,510384321 | 0,87903236 | <b>1,83914135</b> | 2,46771426 | 9,72209092 | 0,001802663 | 0,008670837 | protein_coding |
| ENSMUSG00000031765 | Mt1           | metallothionein 1 [Source:MGI Symbol;Acc:MGI:97171]                                                                  |        | 82,12800998 | 0,87600631 | <b>1,83528788</b> | 6,36083602 | 27,7703919 | 1,36601E-07 | 1,742E-06   | protein_coding |
| ENSMUSG00000029772 | Ahcy12        | S-adenosylhomocysteine hydrolase-like 2 [Source:MGI Symbol;Acc:MGI:1921590]                                          |        | 52,84522221 | 0,87444688 | <b>1,83330508</b> | 5,73029906 | 35,0896302 | 3,14873E-09 | 5,43094E-08 | protein_coding |
| ENSMUSG00000073411 | H2-D1         | histocompatibility 2, D region locus 1 [Source:MGI Symbol;Acc:MGI:95896]                                             |        | 1569,957018 | 0,87442636 | <b>1,833279</b>   | 10,6165271 | 15,2022239 | 9,65896E-05 | 0,00066038  | protein_coding |
| ENSMUSG00000026688 | Mgst3         | microsomal glutathione S-transferase 3 [Source:MGI Symbol;Acc:MGI:1913697]                                           |        | 6,916268914 | 0,87415341 | <b>1,83293219</b> | 2,78827323 | 7,03069946 | 0,008012405 | 0,03019679  | protein_coding |
| ENSMUSG00000058351 | 2010107H07Rik | RIKEN cDNA 2010107H07 gene [Source:MGI Symbol;Acc:MGI:1913737]                                                       |        | 7,931371423 | 0,87333554 | <b>1,83189321</b> | 2,97929599 | 12,0735289 | 0,000511428 | 0,00286262  | protein_coding |
| ENSMUSG00000068566 | Myadm         | myeloid-associated differentiation marker [Source:MGI Symbol;Acc:MGI:1355332]                                        |        | 76,86702125 | 0,87303578 | <b>1,83151279</b> | 6,27169768 | 38,6076639 | 5,18151E-10 | 1,0332E-08  | protein_coding |
| ENSMUSG00000087598 | Zfp111        | zinc finger protein 111 [Source:MGI Symbol;Acc:MGI:1929114]                                                          |        | 8,160017628 | 0,87296819 | <b>1,83142699</b> | 3,04222717 | 12,8062198 | 0,000354569 | 0,002025436 | protein_coding |
| ENSMUSG00000032261 | Sh3bglr2      | SH3 domain binding glutamic acid-rich protein like 2 [Source:MGI Symbol;Acc:MGI:1915350]                             |        | 76,33636327 | 0,87200892 | <b>1,83020966</b> | 6,25579614 | 27,8290034 | 1,32524E-07 | 1,699E-06   | protein_coding |
| ENSMUSG00000037697 | Dhd1          | DDHD domain containing 1 [Source:MGI Symbol;Acc:MGI:2150302]                                                         |        | 12,09790609 | 0,87148351 | <b>1,82954323</b> | 3,60952354 | 16,9689535 | 3,79961E-05 | 0,000286916 | protein_coding |
| ENSMUSG00000017607 | Tns4          | tensin 4 [Source:MGI Symbol;Acc:MGI:2144377]                                                                         |        | 3,544555393 | 0,86716027 | <b>1,82406896</b> | 1,85800209 | 6,85042385 | 0,008862025 | 0,032860973 | protein_coding |
| ENSMUSG00000020604 | Arsg          | arylsulfatase G [Source:MGI Symbol;Acc:MGI:1921258]                                                                  |        | 3,143568993 | 0,86558955 | <b>1,82120841</b> | 1,63246657 | 6,298082   | 0,012086868 | 0,04242761  | protein_coding |
| ENSMUSG00000028152 | Tspan5        | tetraspanin 5 [Source:MGI Symbol;Acc:MGI:1928096]                                                                    |        | 13,85592636 | 0,8650225  | <b>1,82036807</b> | 3,80358885 | 20,1822056 | 7,04048E-06 | 6,34336E-05 | protein_coding |
| ENSMUSG00000027381 | Bcl2l1        | BCL2-like 11 (apoptosis facilitator) [Source:MGI Symbol;Acc:MGI:197519]                                              |        | 49,81386669 | 0,86494447 | <b>1,82126956</b> | 5,63860899 | 27,6886886 | 1,42493E-07 | 1,80991E-06 | protein_coding |
| ENSMUSG00000021867 | Gm9746        | predicted gene 9746 [Source:MGI Symbol;Acc:MGI:3710397]                                                              |        | 5,497375734 | 0,86309171 | <b>1,81893213</b> | 2,46834679 | 9,31546204 | 0,002272281 | 0,010463348 | protein_coding |
| ENSMUSG00000038495 | Otu47b        | OTU domain containing 7B [Source:MGI Symbol;Acc:MGI:2654703]                                                         |        | 21,41195407 | 0,86202356 | <b>1,81758591</b> | 4,42420602 | 27,7694015 | 1,36671E-07 | 1,742E-06   | protein_coding |
| ENSMUSG00000029338 | Antrx2        | anthrax toxin receptor 2 [Source:MGI Symbol;Acc:MGI:1919164]                                                         |        | 41,46816891 | 0,86191666 | <b>1,81745125</b> | 5,37665849 | 26,1519019 | 3,15868E-07 | 3,76476E-06 | protein_coding |
| ENSMUSG00000035790 | Cep19         | centrosomal protein 19 [Source:MGI Symbol;Acc:MGI:1914244]                                                           |        | 6,085475509 | 0,8618342  | <b>1,81734736</b> | 2,62001904 | 8,90946503 | 0,002836964 | 0,012597353 | protein_coding |
| ENSMUSG00000037419 | Endod1        | endonuclease domain containing 1 [Source:MGI Symbol;Acc:MGI:1919196]                                                 |        | 8,431016211 | 0,86048529 | <b>1,81564895</b> | 3,08402126 | 13,0706239 | 0,000299963 | 0,001787254 | protein_coding |
| ENSMUSG00000019088 | Dnase11       | deoxyribonuclease 1-like 1 [Source:MGI Symbol;Acc:MGI:109628]                                                        |        | 71,31117455 | 0,86037098 | <b>1,8155051</b>  | 6,16004386 | 28,1057824 | 1,14862E-07 | 1,49171E-06 | protein_coding |
| ENSMUSG00000028789 | Adc           | arginine decarboxylase [Source:MGI Symbol;Acc:MGI:2442093]                                                           |        | 2,882793452 | 0,86006815 | <b>1,81512405</b> | 1,53902031 | 5,96832439 | 0,014565115 | 0,094072957 | protein_coding |
| ENSMUSG00000030785 | Cox6a2        | cytochrome c oxidase, subunit VI a, polypeptide 2 [Source:MGI Symbol;Acc:MGI:104649]                                 |        | 3,183338185 | 0,85912673 | <b>1,81393999</b> | 1,65722492 | 5,95684781 | 0,014660229 | 0,049332906 | protein_coding |
| ENSMUSG00000042225 | Alprt         | Alport syndrome, mental retardation, midface hypoplasia and elliptocytosis chromosomal region gene 1 [Source:MGI Syr |        | 9,756415421 | 0,85899239 | <b>1,81377109</b> | 3,29433633 | 15,3343373 | 9,00645E-05 | 0,000622351 | protein_coding |
| ENSMUSG00000019979 | Amefc1        | apoptotic peptidase activating factor 1 [Source:MGI Symbol;Acc:MGI:1306796]                                          |        | 47,3723614  | 0,8588064  | <b>1,81353728</b> | 5,57092683 | 28,1457398 | 1,2515E-07  | 1,4647E-06  | protein_coding |
| ENSMUSG00000022439 | Parvg         | parvin, gamma [Source:MGI Symbol;Acc:MGI:2158329]                                                                    |        | 22,98959096 | 0,85774966 | <b>1,81220939</b> | 4,51332482 | 27,6907612 | 1,22341E-07 | 1,80991E-06 | protein_coding |
| ENSMUSG00000038188 | Scar1         | scavenger receptor class F, member 1 [Source:MGI Symbol;Acc:MGI:2449455]                                             |        | 36,83613681 | 0,8573399  | <b>1,81169475</b> | 5,2106148  | 22,3543928 | 4,26949E-06 | 2,27876E-05 | protein_coding |
| ENSMUSG00000056498 | Tmem154       | transmembrane protein 154 [Source:MGI Symbol;Acc:MGI:2444725]                                                        |        | 4,154403824 | 0,85692833 | <b>1,81117799</b> | 2,04482965 | 6,6836952  | 0,009729872 | 0,035586584 | protein_coding |
| ENSMUSG00000052485 | Tmem171       | transmembrane protein 171 [Source:MGI Symbol;Acc:MGI:2685751]                                                        |        | 7,909135521 | 0,85672338 | <b>1,81092072</b> | 3,00396444 | 11,0491822 | 0,000887263 | 0,004628852 | protein_coding |
| ENSMUSG00000030894 | Tpp1          | tripeptidyl peptidase I [Source:MGI Symbol;Acc:MGI:1336194]                                                          |        | 291,8796983 | 0,85660065 | <b>1,81076666</b> | 8,18967425 | 24,2262399 | 8,56573E-07 | 4,8706E-06  | protein_coding |
| ENSMUSG00000024228 | Nudt12        | nudix (nucleoside diphosphate linked moiety X)-type motif 12 [Source:MGI Symbol;Acc:MGI:1915243]                     |        | 3,912340047 | 0,85579264 | <b>1,8097528</b>  | 1,96398921 | 7,12820359 | 0,007588071 | 0,028807927 | protein_coding |
| ENSMUSG00000031016 | Wee1          | WEE 1 homolog 1 (S. pombe) [Source:MGI Symbol;Acc:MGI:103075]                                                        |        | 4,063879233 | 0,85529039 | <b>1,80912287</b> | 2,03299034 | 6,31447149 | 0,011975644 | 0,024144906 | protein_coding |
| ENSMUSG00000013076 | Amot1         | angiominin-like 1 [Source:MGI Symbol;Acc:MGI:1922973]                                                                |        | 4,783365071 | 0,85421997 | <b>1,80778107</b> | 2,29149622 | 6,84164822 | 0,008905663 | 0,033000514 | protein_coding |
| ENSMUSG00000037280 | Galnt6        | UDP-N-acetyl-alpha-D-galactosamine:polypeptide N-acetylglucosaminyltransferase 6 [Source:MGI Symbol;Acc:MGI:11       |        | 143,612763  | 0,85316847 | <b>1,80646395</b> | 7,16759183 | 26,3168073 | 2,89756E-07 | 3,47549E-06 | protein_coding |
| ENSMUSG00000067212 | H2-T23        | histocompatibility 2, T region locus 23 [Source:MGI Symbol;Acc:MGI:95957]                                            |        | 122,7656637 | 0,85205102 | <b>1,80565653</b> | 6,94062614 | 37,5073016 | 9,10714E-10 | 1,7265E-08  | protein_coding |
| ENSMUSG00000070780 | Rbm47         | RNA binding motif protein 47 [Source:MGI Symbol;Acc:MGI:2384294]                                                     |        | 62,51290872 | 0,85217733 | <b>1,80522333</b> | 5,96733258 | 27,60657   | 1,48673E-07 | 1,86256E-06 | protein_coding |
| ENSMUSG00000032497 | Lrrfp2        | leucine rich repeat (in FLLI) interacting protein 2 [Source:MGI Symbol;Acc:MGI:1918518]                              |        | 47,28757064 | 0,85155473 | <b>1,80444446</b> | 5,56735284 | 30,3902815 | 3,53294E-08 | 5,12089E-07 | protein_coding |
| ENSMUSG00000081723 | Gm15931       | predicted gene 15931 [Source:MGI Symbol;Acc:MGI:3805553]                                                             |        | 4,477486978 | 0,85048963 | <b>1,80311278</b> | 2,16491263 | 7,51454684 | 0,000120268 | 0,024024075 | pseudogene     |
| ENSMUSG00000027217 | Tspan18       | tetraspanin 18 [Source:MGI Symbol;Acc:MGI:1917186]                                                                   |        | 4,569354997 | 0,84850312 | <b>1,8006317</b>  | 2,19468558 | 6,58051203 | 0,10310123  | 0,037335966 | protein_coding |
| ENSMUSG00000016256 | Ctsz          | cathepsin Z [Source:MGI Symbol;Acc:MGI:1891190]                                                                      |        | 1065,998198 | 0,8470971  | <b>1,79887769</b> | 10,0581007 | 17,2755979 | 3,2312E-05  | 0,000248582 | protein_coding |
| ENSMUSG00000066621 | Tecpr1        | tectonin beta-propeller repeat containing 1 [Source:MGI Symbol;Acc:MGI:1917631]                                      |        | 104,1392862 | 0,84581022 | <b>1,79727382</b> | 6,70169998 | 30,5047361 | 3,33052E-08 | 4,8725E-07  | protein_coding |
| ENSMUSG00000041801 | Phlda3        | pleckstrin homology-like domain, family A, member 3 [Source:MGI Symbol;Acc:MGI:1351485]                              |        | 29,93361891 | 0,84460983 | <b>1,79577902</b> | 4,9026931  | 15,2549936 | 9,93281E-05 | 0,00064459  | protein_coding |
| ENSMUSG00000024190 | Dusp1         | dual specificity phosphatase 1 [Source:MGI Symbol;Acc:MGI:105120]                                                    |        | 44,05395124 | 0,84077114 | <b>1,79511608</b> | 5,47485514 | 27,2597444 | 1,72876E-07 | 2,20579E-06 | protein_coding |
| ENSMUSG00000031586 | Rbpms         | RNA binding protein gene with multiple splicing [Source:MGI Symbol;Acc:MGI:1334446]                                  |        | 5,895035469 | 0,84289835 | <b>1,79364994</b> | 2,57641099 | 8,43064783 | 0,003689489 | 0,015776345 | protein_coding |
| ENSMUSG00000040511 | Pvr           | poliovirus receptor [Source:MGI Symbol;Acc:MGI:107741]                                                               |        | 33,4538421  | 0,84199344 | <b>1,79252525</b> | 5,07460958 | 25,7232541 | 3,94234E-07 | 4,5787E-06  | protein_coding |
| ENSMUSG00000015980 | Lrrc27        | leucine rich repeat containing 27 [Source:MGI Symbol;Acc:MGI:1923862]                                                |        | 5,798506174 | 0,84058657 | <b>1,79077809</b> | 2,53855162 | 7,59443741 | 0,005854866 | 0,0231727   | protein_coding |
| ENSMUSG00000047821 | Trim16        | tripartite motif-containing 16 [Source:MGI Symbol;Acc:MGI:2137356]                                                   |        | 4,420855331 | 0,83882257 | <b>1,78858981</b> | 2,1387553  | 7,0265912  | 0,008030808 | 0,030238001 | protein_coding |
| ENSMUSG00000044786 | Zfp36         | zinc finger protein 36 [Source:MGI Symbol;Acc:MGI:99180]                                                             |        | 130,2593519 | 0,83744334 | <b>1,78688072</b> | 7,02777266 | 36,6205884 | 1,43508E-09 | 2,63666E-08 | protein_coding |
| ENSMUSG00000029403 | Cdk12         | cyclin-dependent kinase-like 2 (CDC2-related kinase) [Source:MGI Symbol;Acc:MGI:1858227]                             |        | 6,421024021 | 0,8363874  | <b>1,78557335</b> | 2,69071126 | 6,11102093 | 0,013434151 | 0,046096506 | protein_coding |
| ENSMUSG00000028641 | Lepre1        | leprecan 1 [Source:MGI Symbol;Acc:MGI:1888921]                                                                       |        | 7,703760735 | 0,83309741 | <b>1,78150608</b> | 2,95785285 | 10,7754301 | 0,001028563 | 0,005258643 | protein_coding |
| ENSMUSG00000048458 | 6530418L21Rik | RIKEN cDNA 6530418L21 gene [Source:MGI Symbol;Acc:MGI:1923497]                                                       |        | 5,957827339 | 0,83251788 | <b>1,78034629</b> | 2,58142343 | 8,76369969 | 0,003072851 | 0,013449165 | protein_coding |
| ENSMUSG00000038352 | Arl5c         | ADP-ribosylation factor-like 5C [Source:MGI Symbol;Acc:MGI:3028577]                                                  |        | 24,62927305 | 0,83214877 | <b>1,78033504</b> | 4,64619212 | 29,0175671 | 7,17249E-08 | 9,76508E-07 | protein_coding |
| ENSMUSG00000063354 | Slc39a4       | solute carrier family 39 (zinc transporter), member 4 [Source:MGI Symbol;Acc:MGI:1919277]                            |        | 59,83161942 | 0,82664839 | <b>1,77356032</b> | 5,90683193 | 27,9507064 | 1,24446E-07 | 1,60688E-06 | protein_coding |
| ENSMUSG00000000275 | Trim25        | tripartite motif-containing 25 [Source:MGI Symbol;Acc:MGI:102749]                                                    |        | 243,8204166 | 0,82652865 | <b>1,77341311</b> | 7,93026238 | 27,247994  | 1,78961E-07 | 2,21673E-06 | protein_coding |
| ENSMUSG00000024743 | Syt7          | synaptotagmin VII [Source:MGI Symbol;Acc:MGI:1859545]                                                                |        | 11,36005944 | 0,82384435 | <b>1,77011655</b> | 3,54803053 | 13,4760552 | 0,000241627 | 0,001480624 | protein_coding |
| ENSMUSG00000061731 | Ext1          | exostosin (multiple) 1 [Source:MGI Symbol;Acc:MGI:894663]                                                            |        | 15,52356426 | 0,82270236 | <b>1,76871593</b> | 3,97848601 | 19,9723822 | 7,85688E-05 | 6,98976E-05 | protein_coding |
| ENSMUSG00000054364 | Rhob          | ras homolog gene family, member B [Source:MGI Symbol;Acc:MGI:107949]                                                 |        | 146,0586818 | 0,82240339 | <b>1,76839479</b> | 7,19029073 | 31,3284493 | 2,17864E-08 | 3,26558E-07 | protein_coding |
| ENSMUSG00000026701 | Prdx6         | peroxiredoxin 6 [Source:MGI Symbol;Acc:MGI:894320]                                                                   |        | 145,7200288 | 0,82177321 | <b>1,76757718</b> | 7,1918052  | 37,1553892 | 1,90981E-09 | 2,04517E-08 | protein_coding |
| ENSMUSG00000090213 | Tmem189       |                                                                                                                      |        |             |            |                   |            |            |             |             |                |

|                     |               |                                                                                                                       |        |              |            |            |            |            |             |             |                      |
|---------------------|---------------|-----------------------------------------------------------------------------------------------------------------------|--------|--------------|------------|------------|------------|------------|-------------|-------------|----------------------|
| ENSMUSG00000041431  | Ccnb1         | cyclin B1 [Source:MGI Symbol;Acc:MGI:88302]                                                                           | Sheet1 | 12,40313027  | 0,81031147 | 1,75359    | 3,64621502 | 9,8410587  | 0,001706592 | 0,008205834 | protein_coding       |
| ENSMUSG00000061981  | Flot2         | flotillin 2 [Source:MGI Symbol;Acc:MGI:103309]                                                                        |        | 62,47761723  | 0,80960626 | 1,75273302 | 5,97016339 | 30,2090168 | 3,87902E-08 | 5,57108E-07 | protein_coding       |
| ENSMUSG00000021215  | Net1          | neuroepithelial cell transforming gene 1 [Source:MGI Symbol;Acc:MGI:1927138]                                          |        | 6,473521505  | 0,80823689 | 1,75107017 | 2,71902683 | 8,7126637  | 0,003160071 | 0,013788604 | protein_coding       |
| ENSMUSG00000031337  | Mtm1          | X-linked myotubular myopathy gene 1 [Source:MGI Symbol;Acc:MGI:1099452]                                               |        | 24,3031305   | 0,80766486 | 1,750376   | 4,60810617 | 26,1031505 | 3,3655E-07  | 3,84018E-06 | protein_coding       |
| ENSMUSG00000038024  | Dennad4c      | DENN/MADD domain containing 4C [Source:MGI Symbol;Acc:MGI:1914769]                                                    |        | 94,73263     | 0,80607409 | 1,74844703 | 6,56765108 | 23,5731085 | 1,20256E-06 | 1,27781E-05 | protein_coding       |
| ENSMUSG00000052512  | Nav2          | neuron navigator 2 [Source:MGI Symbol;Acc:MGI:2183691]                                                                |        | 33,87014542  | 0,80543884 | 1,74767732 | 5,08342489 | 9,59430024 | 0,001951823 | 0,009184017 | protein_coding       |
| ENSMUSG00000030095  | Tmem43        | transmembrane protein 43 [Source:MGI Symbol;Acc:MGI:1921372]                                                          |        | 66,47018135  | 0,80534749 | 1,74756667 | 6,05788143 | 29,365845  | 5,99245E-08 | 8,28165E-07 | protein_coding       |
| ENSMUSG000000021262 | Evl           | Ena-vasodilator stimulated phosphoprotein [Source:MGI Symbol;Acc:MGI:1194884]                                         |        | 137,622436   | 0,80520042 | 1,74738853 | 7,10645593 | 35,5841171 | 2,44271E-09 | 4,3148E-08  | protein_coding       |
| ENSMUSG00000003032  | Klf4          | Kruppel-like factor 4 (gut) [Source:MGI Symbol;Acc:MGI:1342287]                                                       |        | 11,44925105  | 0,8034922  | 1,74532076 | 3,52125291 | 15,6782135 | 7,50841E-05 | 0,000531776 | protein_coding       |
| ENSMUSG00000032737  | Inpp1         | inositol polyphosphate phosphatase-like 1 [Source:MGI Symbol;Acc:MGI:1333787]                                         |        | 165,6027954  | 0,80328578 | 1,74507105 | 7,37276013 | 31,644     | 1,85186E-08 | 2,82588E-07 | protein_coding       |
| ENSMUSG00000000489  | Pdgfb         | platelet derived growth factor, B polypeptide [Source:MGI Symbol;Acc:MGI:97528]                                       |        | 22,29283378  | 0,80287237 | 1,74457106 | 4,47712823 | 18,5181785 | 1,68292E-05 | 0,000139549 | protein_coding       |
| ENSMUSG00000028007  | Snx7          | sorting nexin 7 [Source:MGI Symbol;Acc:MGI:1923811]                                                                   |        | 12,29986656  | 0,80220149 | 1,74376    | 3,62727677 | 13,8649752 | 0,000196425 | 0,001233919 | protein_coding       |
| ENSMUSG00000045658  | Pid1          | phosphotyrosine interaction domain containing 1 [Source:MGI Symbol;Acc:MGI:2138391]                                   |        | 145,8136966  | 0,80113386 | 1,74247005 | 7,19227854 | 35,4678946 | 2,59289E-09 | 4,5654E-08  | protein_coding       |
| ENSMUSG00000018507  | Trpv2         | transient receptor potential cation channel, subfamily V, member 2 [Source:MGI Symbol;Acc:MGI:1341836]                |        | 112,0095394  | 0,801028   | 1,7423422  | 6,80949808 | 29,7092997 | 5,01934E-08 | 7,06114E-07 | protein_coding       |
| ENSMUSG00000048779  | P2ry6         | pyrimidinergic receptor P2Y, G-protein coupled, 6 [Source:MGI Symbol;Acc:MGI:2673874]                                 |        | 105,5504811  | 0,79879482 | 1,73964728 | 6,72333446 | 37,5058091 | 9,11411E-10 | 1,7265E-08  | protein_coding       |
| ENSMUSG00000042724  | Map3k9        | mitogen-activated protein kinase kinase kinase 9 [Source:MGI Symbol;Acc:MGI:2449952]                                  |        | 8,312926041  | 0,7949137  | 1,73506699 | 3,0635843  | 8,50286345 | 0,00354588  | 0,015218198 | protein_coding       |
| ENSMUSG00000032120  | C2cd2l        | C2 calcium-dependent domain containing 2-like [Source:MGI Symbol;Acc:MGI:1919014]                                     |        | 16,29604201  | 0,79497849 | 1,7350515  | 4,02108698 | 21,4158653 | 3,69699E-06 | 3,05619E-05 | protein_coding       |
| ENSMUSG00000042766  | Trim46        | tripartite motif-containing 46 [Source:MGI Symbol;Acc:MGI:2673000]                                                    |        | 4,150197611  | 0,79486561 | 1,73491575 | 2,04795091 | 6,20324158 | 0,012751656 | 0,044238222 | protein_coding       |
| ENSMUSG00000095028  | Sirpb1b       | signal-regulatory protein beta 1B [Source:MGI Symbol;Acc:MGI:3779828]                                                 |        | 10,42956707  | 0,79464743 | 1,7346534  | 3,3823041  | 11,6405145 | 0,000645308 | 0,003508161 | protein_coding       |
| ENSMUSG00000085894  | Gm15832       | predicted gene 15832 [Source:MGI Symbol;Acc:MGI:3834078]                                                              |        | 6,966374702  | 0,79417159 | 1,73408136 | 2,80201138 | 8,9006185  | 0,002850741 | 0,012649874 | processed_transcript |
| ENSMUSG00000021669  | Col4a3bp      | collagen, type IV, alpha 3 (Goodpasture antigen) binding protein [Source:MGI Symbol;Acc:MGI:1915268]                  |        | 69,45643488  | 0,79323747 | 1,73295894 | 6,12024363 | 31,0127978 | 2,56333E-08 | 3,79559E-07 | protein_coding       |
| ENSMUSG00000063160  | Numb          | numb-like [Source:MGI Symbol;Acc:MGI:894702]                                                                          |        | 11,105239    | 0,79231934 | 1,73185643 | 3,46881751 | 12,8434993 | 0,00398663  | 0,00190844  | protein_coding       |
| ENSMUSG00000032192  | Gnb5          | guanine nucleotide binding protein (G protein), beta 5 [Source:MGI Symbol;Acc:MGI:101848]                             |        | 4,125722005  | 0,79160309 | 1,73099684 | 2,05591517 | 6,33102099 | 0,0118644   | 0,041833812 | protein_coding       |
| ENSMUSG00000042599  | Hdm1d         | jumonji C domain-containing histone demethylase 1 homolog D (S. cerevisiae) [Source:MGI Symbol;Acc:MGI:2443388]       |        | 48,59154018  | 0,7905979  | 1,72979119 | 5,60691001 | 32,2083997 | 1,38491E-08 | 2,15524E-07 | protein_coding       |
| ENSMUSG00000029217  | Tec           | tec protein tyrosine kinase [Source:MGI Symbol;Acc:MGI:98862]                                                         |        | 40,14993352  | 0,78974056 | 1,72976355 | 5,32635634 | 24,3520384 | 8,02418E-07 | 8,94134E-06 | protein_coding       |
| ENSMUSG00000026640  | PlxnA2        | plexin A2 [Source:MGI Symbol;Acc:MGI:107684]                                                                          |        | 13,68842621  | 0,78948834 | 1,72846135 | 3,78113075 | 11,8057728 | 0,000590473 | 0,003245389 | protein_coding       |
| ENSMUSG00000034993  | Vat1          | vesicle amine transport protein 1 homolog (T. californica) [Source:MGI Symbol;Acc:MGI:1349450]                        |        | 564,6533162  | 0,78895661 | 1,72782441 | 9,14138572 | 16,2919641 | 5,42937E-05 | 0,000397366 | protein_coding       |
| ENSMUSG00000030980  | 2310008H09Rik | RIKEN cDNA 2310008H09 gene [Source:MGI Symbol;Acc:MGI:1913606]                                                        |        | 39,25674869  | 0,78864148 | 1,72744704 | 5,3003741  | 21,7468812 | 3,11095E-06 | 3,04907E-05 | protein_coding       |
| ENSMUSG00000014361  | Mertk         | c-mer proto-oncogene tyrosine kinase [Source:MGI Symbol;Acc:MGI:96965]                                                |        | 42,30999353  | 0,78498346 | 1,72307257 | 5,40764474 | 17,0672873 | 3,60784E-05 | 0,000273375 | protein_coding       |
| ENSMUSG00000026566  | Mpz11         | myelin protein zero-like 1 [Source:MGI Symbol;Acc:MGI:1915731]                                                        |        | 10,00796453  | 0,78453452 | 1,72253647 | 3,34250661 | 11,740558  | 0,000611527 | 0,003347706 | protein_coding       |
| ENSMUSG00000028693  | Nasp          | nuclear autoantigenic sperm protein (histone-binding) [Source:MGI Symbol;Acc:MGI:1355328]                             |        | 20,41489391  | 0,78416271 | 1,72209259 | 4,36622829 | 19,6625262 | 9,23956E-06 | 8,08241E-05 | protein_coding       |
| ENSMUSG00000027663  | Zmat3         | zinc finger matrix type 3 [Source:MGI Symbol;Acc:MGI:1195270]                                                         |        | 75,59055575  | 0,78335539 | 1,72112919 | 6,24175536 | 17,5176403 | 2,84654E-05 | 0,000221966 | protein_coding       |
| ENSMUSG00000059326  | Csf2ra        | colony stimulating factor 2 receptor, alpha, low-affinity (granulocyte-macrophage) [Source:MGI Symbol;Acc:MGI:133975] |        | 156,8207301  | 0,78201511 | 1,71953099 | 7,29220664 | 26,6042697 | 2,49691E-07 | 3,01468E-06 | protein_coding       |
| ENSMUSG00000035352  | Col12         | chemokine (C-C motif) ligand 12 [Source:MGI Symbol;Acc:MGI:108224]                                                    |        | 5,334817832  | 0,78150173 | 1,7189192  | 2,47246904 | 6,38026556 | 0,011539616 | 0,04089634  | protein_coding       |
| ENSMUSG00000074063  | Osgin1        | oxidative stress induced growth inhibitor 1 [Source:MGI Symbol;Acc:MGI:1919089]                                       |        | 21,28481259  | 0,78086539 | 1,71816119 | 4,41648526 | 16,2044857 | 5,68593E-05 | 0,000412897 | protein_coding       |
| ENSMUSG00000026335  | Pam           | peptidylglycine alpha-amidating monooxygenase [Source:MGI Symbol;Acc:MGI:97475]                                       |        | 30,46566964  | 0,78059091 | 1,71783433 | 4,9377867  | 22,7659452 | 1,88593E-06 | 1,88593E-05 | protein_coding       |
| ENSMUSG00000030591  | PsmD8         | proteasome (prosome, macropain) 26S subunit, non-ATPase, 8 [Source:MGI Symbol;Acc:MGI:1888669]                        |        | 211,1316913  | 0,77921168 | 1,71619286 | 7,72224177 | 26,409411  | 2,76192E-07 | 3,32004E-06 | protein_coding       |
| ENSMUSG00000020829  | Slc46a1       | solute carrier family 46, member 1 [Source:MGI Symbol;Acc:MGI:1098733]                                                |        | 14,16644818  | 0,77801552 | 1,71477053 | 3,82384772 | 16,6494689 | 4,49629E-05 | 0,000333563 | protein_coding       |
| ENSMUSG00000042073  | Abhd14b       | abhydrolase domain containing 14b [Source:MGI Symbol;Acc:MGI:1923741]                                                 |        | 7,366809591  | 0,77785856 | 1,71458397 | 2,89445578 | 9,13652149 | 0,00250557  | 0,01134417  | protein_coding       |
| ENSMUSG00000024300  | Myo1f         | myosin IF [Source:MGI Symbol;Acc:MGI:107711]                                                                          |        | 299,55911    | 0,77707987 | 1,71365878 | 8,22658571 | 23,7746077 | 1,08302E-02 | 1,16658E-05 | protein_coding       |
| ENSMUSG00000047766  | Lrrc49        | leucine rich repeat containing 49 [Source:MGI Symbol;Acc:MGI:2442689]                                                 |        | 7,152062451  | 0,77688252 | 1,71342437 | 2,84320349 | 9,0345659  | 0,00264922  | 0,011876788 | protein_coding       |
| ENSMUSG00000048234  | Rnf149        | ring finger protein 149 [Source:MGI Symbol;Acc:MGI:2677438]                                                           |        | 191,8629691  | 0,77541848 | 1,71168648 | 7,58556045 | 28,6756327 | 8,55737E-08 | 1,13551E-06 | protein_coding       |
| ENSMUSG00000042303  | Sgsm3         | small G protein signaling modulator 3 [Source:MGI Symbol;Acc:MGI:1916329]                                             |        | 19,41119751  | 0,77280193 | 1,7085849  | 4,27869543 | 20,2028747 | 6,96482E-06 | 6,29297E-05 | protein_coding       |
| ENSMUSG00000027035  | Lass6         | LAG1 homolog, ceramide synthase 6 [Source:MGI Symbol;Acc:MGI:2442564]                                                 |        | 49,0973745   | 0,77106352 | 1,70652733 | 5,62160627 | 27,2117714 | 1,82345E-07 | 2,25399E-06 | protein_coding       |
| ENSMUSG00000040918  | Slc19a2       | solute carrier family 19 (thiamine transporter), member 2 [Source:MGI Symbol;Acc:MGI:1928761]                         |        | 7,61987393   | 0,77047452 | 1,70615359 | 4,05428934 | 12,487867  | 0,000409604 | 0,002357416 | protein_coding       |
| ENSMUSG00000003153  | Slc2a3        | solute carrier family 2 (facilitated glucose transporter), member 3 [Source:MGI Symbol;Acc:MGI:95757]                 |        | 10,016406533 | 0,76654005 | 1,70118501 | 2,83104666 | 9,34374815 | 0,002237474 | 0,010316043 | protein_coding       |
| ENSMUSG00000044847  | Lsm11         | U7 snRNP-specific Sm-like protein LSM11 [Source:MGI Symbol;Acc:MGI:1919540]                                           |        | 8,517557703  | 0,76649729 | 1,70113459 | 3,09831461 | 11,299058  | 0,000775464 | 0,00412992  | protein_coding       |
| ENSMUSG00000039782  | Cpeb2         | cytoplasmic polyadenylation element binding protein 2 [Source:MGI Symbol;Acc:MGI:2442640]                             |        | 47,36197588  | 0,76597323 | 1,70051676 | 5,5688359  | 19,8894739 | 8,20509E-06 | 7,28185E-05 | protein_coding       |
| ENSMUSG00000063229  | Ldha          | lactate dehydrogenase A [Source:MGI Symbol;Acc:MGI:96759]                                                             |        | 583,5984732  | 0,7654587  | 1,69991039 | 9,18924836 | 18,8118046 | 1,44271E-05 | 0,000121371 | protein_coding       |
| ENSMUSG00000047557  | Lxn           | latexin [Source:MGI Symbol;Acc:MGI:107633]                                                                            |        | 9,118798737  | 0,7640312  | 1,69822922 | 3,19777996 | 10,9105348 | 0,000956189 | 0,004939187 | protein_coding       |
| ENSMUSG00000019699  | Akt3          | thymoma viral proto-oncogene 3 [Source:MGI Symbol;Acc:MGI:1345147]                                                    |        | 23,26143662  | 0,7636849  | 1,69782163 | 4,5469431  | 19,0948684 | 1,24379E-05 | 0,000105607 | protein_coding       |
| ENSMUSG00000018395  | Kif3a         | kinesin family member 3A [Source:MGI Symbol;Acc:MGI:107689]                                                           |        | 25,99872048  | 0,76367234 | 1,69780685 | 4,70850182 | 23,4886257 | 1,25654E-06 | 1,32747E-05 | protein_coding       |
| ENSMUSG00000079884  | Gm10698       | predicted gene 10698 [Source:MGI Symbol;Acc:MGI:3704329]                                                              |        | 24,59001193  | 0,76313545 | 1,69717514 | 4,64001866 | 12,9572001 | 0,000318693 | 0,00188351  | processed_pseudogene |
| ENSMUSG00000031669  | Gins3         | GINS complex subunit 3 (Psf3 homolog) [Source:MGI Symbol;Acc:MGI:1926083]                                             |        | 5,043947452  | 0,76219207 | 1,69606572 | 2,35230059 | 6,90060001 | 0,008616683 | 0,032059428 | protein_coding       |
| ENSMUSG00000038141  | Tmem181a      | transmembrane protein 181A [Source:MGI Symbol;Acc:MGI:1924356]                                                        |        | 28,41903148  | 0,76212469 | 1,6959865  | 4,84016643 | 21,456894  | 3,61873E-06 | 3,49991E-05 | protein_coding       |
| ENSMUSG00000079547  | H2-DMb1       | histocompatibility 2, class II, locus Mb1 [Source:MGI Symbol;Acc:MGI:95922]                                           |        | 16,34801052  | 0,76206988 | 1,69591867 | 4,03593129 | 17,1114562 | 3,5249E-05  | 0,000267459 | protein_coding       |
| ENSMUSG00000032076  | Cadm1         | cell adhesion molecule 1 [Source:MGI Symbol;Acc:MGI:1889272]                                                          |        | 38,37553394  | 0,76105306 | 1,6947272  | 5,26023977 | 15,5676857 | 7,96035E-05 | 0,000558139 | protein_coding       |
| ENSMUSG00000036718  | Mical2        | MICAL-like 2 [Source:MGI Symbol;Acc:MGI:2444818]                                                                      |        | 32,29540435  | 0,76033052 | 1,69387864 | 5,01939385 | 21,6510493 | 3,27031E-06 | 3,18536E-05 | protein_coding       |
| ENSMUSG00000048787  | Dcn1d3        | DCN1, defective in cullin neddylation 1, domain containing 3 (S. cerevisiae) [Source:MGI Symbol;Acc:MGI:2679003]      |        | 22,20547588  | 0,76006869 | 1,69357126 | 4,48630707 | 19,234791  | 1,15588E-05 | 9,87528E-05 | protein_coding       |
| ENSMUSG00000066900  | Suds3         | suppressor of defective silencing 3 homolog (S. cerevisiae) [Source:MGI Symbol;Acc:MGI:1919204]                       |        | 47,22718828  | 0,75961259 | 1,69350393 | 5,56610887 | 25,9113457 | 3,57462E-07 | 4,18703E-06 | protein_coding       |
| ENSMUSG00000079065  | BC005561      | cDNA sequence BC005561 [Source:MGI Symbol;Acc:MGI:3040669]                                                            |        | 8,501652196  | 0,75823441 | 1,69141937 | 3,08684468 | 10,6536417 | 0,001098544 | 0,005562075 | protein_coding       |
| ENSMUSG00000092341  | Malat1        | metastasis associated lung adenocarcinoma transcript 1 (non-coding RNA) [Source:MGI Symbol;Acc:MGI:1919539]           |        | 783,4868167  | 0,75780359 | 1,69091436 | 9,61372035 | 14,5704922 | 0,000135012 | 0,000886659 | lincRNA              |
| ENSMUSG00000021639  | Gtf2h2        | general transcription factor II H, polypeptide 2 [Source:MGI Symbol;                                                  |        |              |            |            |            |            |             |             |                      |

|                     |               |                                                                                                                        |        |             |            |                    |            |            |             |              |                      |
|---------------------|---------------|------------------------------------------------------------------------------------------------------------------------|--------|-------------|------------|--------------------|------------|------------|-------------|--------------|----------------------|
| ENSMUSG00000037622  | Wdct1         | WD and tetratricopeptide repeats 1 [Source:MGI Symbol;Acc:MGI:2685541]                                                 | Sheet1 | 39,95333737 | 0,74478495 | <b>1,67572447</b>  | 5,32306777 | 22,5406359 | 2,05745E-06 | 2,08728E-05  | protein_coding       |
| ENSMUSG00000020315  | Spnb2         | spectrin beta 2 [Source:MGI Symbol;Acc:MGI:98388]                                                                      |        | 79,72746885 | 0,74440745 | <b>1,67528605</b>  | 6,31996222 | 21,8698661 | 2,9178E-06  | 2,87E-05     | protein_coding       |
| ENSMUSG00000031153  | Gripap1       | GRIP1 associated protein 1 [Source:MGI Symbol;Acc:MGI:1859616]                                                         |        | 64,75106703 | 0,74312704 | <b>1,67379987</b>  | 6,01795351 | 29,4033302 | 5,87766E-08 | 8,16503E-07  | protein_coding       |
| ENSMUSG00000018986  | Sfln3         | schlafen 3 [Source:MGI Symbol;Acc:MGI:1329005]                                                                         |        | 7,436928438 | 0,7422715  | <b>1,67298806</b>  | 2,90762683 | 7,90477442 | 0,004930449 | 0,01995978   | protein_coding       |
| ENSMUSG00000028016  | Ints12        | integrator complex subunit 12 [Source:MGI Symbol;Acc:MGI:1919043]                                                      |        | 32,07498768 | 0,74210676 | <b>1,67261656</b>  | 5,00931209 | 26,2151767 | 3,05413E-07 | 3,65133E-06  | protein_coding       |
| ENSMUSG00000069910  | Ccdc99        | coiled-coil domain containing 99 [Source:MGI Symbol;Acc:MGI:1917635]                                                   |        | 11,14131511 | 0,74183859 | <b>1,67230569</b>  | 3,48561951 | 9,87369273 | 0,001676587 | 0,008075694  | protein_coding       |
| ENSMUSG0000003382   | Etv3          | ets variant gene 3 [Source:MGI Symbol;Acc:MGI:1350926]                                                                 |        | 127,0598569 | 0,74084464 | <b>1,67115394</b>  | 6,99036712 | 31,4803318 | 2,01471E-08 | 3,0406E-07   | protein_coding       |
| ENSMUSG00000025701  | Alox5         | arachidonate 5-lipoxygenase [Source:MGI Symbol;Acc:MGI:87999]                                                          |        | 6,740074352 | 0,73986798 | <b>1,67002301</b>  | 2,75662366 | 7,82546652 | 0,005151515 | 0,020785785  | protein_coding       |
| ENSMUSG00000045894  | Glb1          | galactosidase, beta 1 [Source:MGI Symbol;Acc:MGI:88151]                                                                |        | 103,1145474 | 0,73975187 | <b>1,66988861</b>  | 6,69044052 | 27,2003821 | 1,83422E-07 | 0,26434E-06  | protein_coding       |
| ENSMUSG00000073542  | Cep76         | centrosomal protein 76 [Source:MGI Symbol;Acc:MGI:1923401]                                                             |        | 5,93696076  | 0,73966044 | <b>1,66978279</b>  | 2,56867048 | 7,55257884 | 0,005992426 | 0,0023618767 | protein_coding       |
| ENSMUSG00000024589  | Nedd4l        | neural precursor cell expressed, developmentally down-regulated gene 4-like [Source:MGI Symbol;Acc:MGI:1933754]        |        | 25,06445996 | 0,73961428 | <b>1,668972936</b> | 4,64782967 | 18,2229145 | 1,965E-05   | 0,001599922  | protein_coding       |
| ENSMUSG00000046794  | Ppp1r3b       | protein phosphatase 1, regulatory (inhibitor) subunit 3B [Source:MGI Symbol;Acc:MGI:2177268]                           |        | 14,01188964 | 0,73889111 | <b>1,668892959</b> | 3,81193502 | 16,2321268 | 5,60357E-05 | 0,000408537  | protein_coding       |
| ENSMUSG00000038543  | BC028528      | cDNA sequence BC028528 [Source:MGI Symbol;Acc:MGI:2385885]                                                             |        | 14,07906175 | 0,7386862  | <b>1,66865557</b>  | 3,8235207  | 15,6773718 | 7,51175E-05 | 0,000531776  | protein_coding       |
| ENSMUSG00000036887  | C1qa          | complement component 1, q subcomponent, alpha polypeptide [Source:MGI Symbol;Acc:MGI:88223]                            |        | 560,1323141 | 0,73807211 | <b>1,66794545</b>  | 9,12967719 | 18,5608254 | 1,64568E-05 | 0,000136771  | protein_coding       |
| ENSMUSG00000032411  | Tfdp2         | transcription factor Dp 2 [Source:MGI Symbol;Acc:MGI:107167]                                                           |        | 7,138263216 | 0,73797519 | <b>1,66783341</b>  | 2,84761053 | 8,98359816 | 0,00272437  | 0,012171652  | protein_coding       |
| ENSMUSG00000028527  | Ak4           | adenylate kinase 4 [Source:MGI Symbol;Acc:MGI:87979]                                                                   |        | 9,818003725 | 0,73735259 | <b>1,6671138</b>   | 3,31587502 | 10,2132561 | 0,001394348 | 0,006836099  | protein_coding       |
| ENSMUSG00000040609  | CD33          | CD33 antigen [Source:MGI Symbol;Acc:MGI:99440]                                                                         |        | 9,486123271 | 0,73630725 | <b>1,66590629</b>  | 2,3545424  | 11,5680651 | 0,000670942 | 0,003634931  | protein_coding       |
| ENSMUSG00000026360  | Rgs2          | regulator of G-protein signaling 2 [Source:MGI Symbol;Acc:MGI:1098271]                                                 |        | 41,3892329  | 0,73571715 | <b>1,66522503</b>  | 5,35823822 | 26,7842851 | 2,2748E-07  | 2,75863E-06  | protein_coding       |
| ENSMUSG00000019769  | Syn1          | synaptic nuclear envelope 1 [Source:MGI Symbol;Acc:MGI:1927152]                                                        |        | 22,04663667 | 0,73441909 | <b>1,66372742</b>  | 4,46475325 | 17,3028908 | 3,18702E-05 | 0,00042538   | protein_coding       |
| ENSMUSG000000061175 | Flnp2         | filliculin interacting protein 2 [Source:MGI Symbol;Acc:MGI:2683054]                                                   |        | 344,9928728 | 0,73193794 | <b>1,6608686</b>   | 8,43061297 | 15,853515  | 6,84393E-05 | 0,000487009  | protein_coding       |
| ENSMUSG00000024424  | Ttc39c        | tetratricopeptide repeat domain 39C [Source:MGI Symbol;Acc:MGI:1919997]                                                |        | 13,28318801 | 0,73039815 | <b>1,6590969</b>   | 3,73900541 | 14,139463  | 0,000169745 | 0,01084297   | protein_coding       |
| ENSMUSG00000017418  | Ar15b         | ADP-ribosylation factor-like 5B [Source:MGI Symbol;Acc:MGI:1923119]                                                    |        | 10,67153255 | 0,72968113 | <b>1,65827253</b>  | 3,43224658 | 11,9963168 | 0,000533058 | 0,00297144   | protein_coding       |
| ENSMUSG00000063286  | Gm8995        | predicted gene 8995 [Source:MGI Symbol;Acc:MGI:3644223]                                                                |        | 18,23547714 | 0,72941576 | <b>1,65796754</b>  | 4,19693255 | 13,2877542 | 0,000267145 | 0,001613593  | processed_pseudogene |
| ENSMUSG00000024924  | Vldlr         | very low density lipoprotein receptor [Source:MGI Symbol;Acc:MGI:98935]                                                |        | 5,38988481  | 0,728815   | <b>1,65727728</b>  | 2,43202397 | 6,08910157 | 0,013601823 | 0,046468667  | protein_coding       |
| ENSMUSG00000039616  | Mocos         | molybdenum cofactor sulfufase [Source:MGI Symbol;Acc:MGI:1915841]                                                      |        | 42,38141579 | 0,72873724 | <b>1,65718796</b>  | 5,40840863 | 14,673051  | 0,000127861 | 0,000846783  | protein_coding       |
| ENSMUSG00000063382  | Bcl9l         | B cell CLL/lymphoma 9-like [Source:MGI Symbol;Acc:MGI:1933114]                                                         |        | 10,10142854 | 0,7276179  | <b>1,65590269</b>  | 3,32295564 | 10,8089212 | 0,01010121  | 0,005176401  | protein_coding       |
| ENSMUSG00000032324  | Tspan3        | tetraspanin 3 [Source:MGI Symbol;Acc:MGI:1928098]                                                                      |        | 165,6181291 | 0,72615175 | <b>1,654202073</b> | 3,73504246 | 29,8618827 | 4,63945E-08 | 6,56031E-07  | protein_coding       |
| ENSMUSG00000091780  | Sco2          | SCO cytochrome oxidase deficient homolog 2 (yeast) [Source:MGI Symbol;Acc:MGI:3818630]                                 |        | 8,998866216 | 0,72518073 | <b>1,65310771</b>  | 3,16964584 | 10,4196161 | 0,001246838 | 0,006207073  | protein_coding       |
| ENSMUSG00000063856  | Gpx1          | glutathione peroxidase 1 [Source:MGI Symbol;Acc:MGI:104887]                                                            |        | 106,1733031 | 0,72496299 | <b>1,65254893</b>  | 6,7276249  | 31,2044071 | 3,22238E-08 | 3,46215E-07  | protein_coding       |
| ENSMUSG00000011179  | Odc1          | ornithine decarboxylase, structural 1 [Source:MGI Symbol;Acc:MGI:97402]                                                |        | 76,53687865 | 0,72450816 | <b>1,65233723</b>  | 6,26266924 | 27,6290542 | 1,46955E-07 | 1,8516E-06   | protein_coding       |
| ENSMUSG00000025950  | Ildh1         | isocitrate dehydrogenase 1 (NADP+), soluble [Source:MGI Symbol;Acc:MGI:96413]                                          |        | 134,1390321 | 0,72395131 | <b>1,65169958</b>  | 7,06808614 | 30,5175316 | 3,30863E-08 | 4,84692E-07  | protein_coding       |
| ENSMUSG00000039747  | Orai2         | ORAI calcium release-activated calcium modulator 2 [Source:MGI Symbol;Acc:MGI:2443195]                                 |        | 38,55235888 | 0,72379825 | <b>1,65152436</b>  | 5,27698576 | 25,1844639 | 5,21002E-07 | 5,93802E-06  | protein_coding       |
| ENSMUSG00000057134  | Ado           | 2-aminoethanethiol (cysteamine) dioxygenase [Source:MGI Symbol;Acc:MGI:2685083]                                        |        | 38,22188065 | 0,72294474 | <b>1,65054759</b>  | 5,25962268 | 25,1665686 | 5,25859E-07 | 5,98097E-06  | protein_coding       |
| ENSMUSG00000020063  | Sirt1         | sirtuin 1 (silent mating type information regulation 2, homolog) 1 (S. cerevisiae) [Source:MGI Symbol;Acc:MGI:2135607] |        | 15,54160526 | 0,72210743 | <b>1,64958993</b>  | 3,96090058 | 15,9237784 | 6,5945E-05  | 0,000471704  | protein_coding       |
| ENSMUSG00000090124  | Ugt1a7c       | UDP glucuronosyltransferase 1 family, polypeptide A7C [Source:MGI Symbol;Acc:MGI:3032636]                              |        | 163,8205719 | 0,72167402 | <b>1,64909444</b>  | 7,35789879 | 21,3412551 | 3,8437E-06  | 3,68506E-05  | protein_coding       |
| ENSMUSG00000026923  | Notch1        | notch 1 [Source:MGI Symbol;Acc:MGI:97363]                                                                              |        | 124,4822392 | 0,72149937 | <b>1,64889481</b>  | 6,96013833 | 29,3663475 | 5,9909E-08  | 8,28165E-07  | protein_coding       |
| ENSMUSG00000036026  | Tmem63b       | transmembrane protein 63b [Source:MGI Symbol;Acc:MGI:2387609]                                                          |        | 31,16309437 | 0,72103038 | <b>1,64844194</b>  | 4,9652548  | 22,1925662 | 2,46627E-06 | 2,46882E-05  | protein_coding       |
| ENSMUSG00000062190  | Lanc12        | LANC (bacterial lantibiotic synthetase component C)-like 2 [Source:MGI Symbol;Acc:MGI:1919085]                         |        | 15,88625562 | 0,72045577 | <b>1,64770474</b>  | 3,99626254 | 12,4868922 | 0,000409817 | 0,002357416  | protein_coding       |
| ENSMUSG00000045165  | Al467606      | expressed sequence Al467606 [Source:MGI Symbol;Acc:MGI:2141979]                                                        |        | 16,96190008 | 0,72043145 | <b>1,64767471</b>  | 4,07943581 | 18,7141559 | 1,51851E-05 | 0,000127164  | protein_coding       |
| ENSMUSG00000004565  | Pnpla6        | patatin-like phospholipase domain containing 6 [Source:MGI Symbol;Acc:MGI:1354723]                                     |        | 26,43162014 | 0,71983793 | <b>1,6469997</b>   | 4,72330854 | 22,8872522 | 1,71787E-06 | 1,77557E-05  | protein_coding       |
| ENSMUSG00000033960  | Gdf15         | growth differentiation factor 15 [Source:MGI Symbol;Acc:MGI:1346047]                                                   |        | 43,99223827 | 0,71975276 | <b>1,64689977</b>  | 5,46079416 | 12,099394  | 0,000504382 | 0,0002830259 | protein_coding       |
| ENSMUSG00000073557  | Ppp1r12b      | protein phosphatase 1, regulatory (inhibitor) subunit 12B [Source:MGI Symbol;Acc:MGI:1916417]                          |        | 12,875524   | 0,71919917 | <b>1,64626795</b>  | 3,68079699 | 13,1172191 | 0,000292594 | 0,001749899  | protein_coding       |
| ENSMUSG00000022010  | Tsc2d21       | TSC22 domain family, member 1 [Source:MGI Symbol;Acc:MGI:109127]                                                       |        | 22,41555748 | 0,71905402 | <b>1,64610233</b>  | 4,49101005 | 17,7026973 | 2,5826E-05  | 0,000203844  | protein_coding       |
| ENSMUSG00000034284  | Zdhhc14       | zinc finger, DHHC domain containing 14 [Source:MGI Symbol;Acc:MGI:2653229]                                             |        | 29,29443594 | 0,71843019 | <b>1,6453907</b>   | 4,87300732 | 18,8020152 | 1,45014E-05 | 0,000121809  | protein_coding       |
| ENSMUSG00000029007  | Agtrp         | angiotensin II, type I receptor-associated protein [Source:MGI Symbol;Acc:MGI:1339977]                                 |        | 48,37470753 | 0,71817367 | <b>1,64509817</b>  | 5,60031755 | 28,2574156 | 1,06207E-07 | 1,38751E-06  | protein_coding       |
| ENSMUSG00000016552  | Foxed2        | FAD-dependent oxidoreductase domain containing 2 [Source:MGI Symbol;Acc:MGI:106315]                                    |        | 6,55666494  | 0,71721257 | <b>1,64458271</b>  | 2,71423648 | 6,72530477 | 0,009505449 | 0,003870239  | protein_coding       |
| ENSMUSG00000058163  | Gm5431        | predicted gene 5431 [Source:MGI Symbol;Acc:MGI:3645205]                                                                |        | 23,86128175 | 0,71735991 | <b>1,64417049</b>  | 4,5864868  | 16,2909529 | 5,43227E-05 | 0,000397366  | protein_coding       |
| ENSMUSG00000026836  | Aocr1         | activin A receptor, type 1 [Source:MGI Symbol;Acc:MGI:87911]                                                           |        | 14,88239898 | 0,71695918 | <b>1,64371387</b>  | 3,9104028  | 10,8063605 | 0,00101152  | 0,00518115   | protein_coding       |
| ENSMUSG00000033960  | 9430020K01Rik | RIKEN cDNA 9430020K01 gene [Source:MGI Symbol;Acc:MGI:2685174]                                                         |        | 7,580427549 | 0,71671801 | <b>1,64343912</b>  | 2,94038192 | 7,33259834 | 0,006771509 | 0,026178246  | protein_coding       |
| ENSMUSG00000060639  | Hist1h4i      | histone cluster 1, H4i [Source:MGI Symbol;Acc:MGI:2448432]                                                             |        | 5,12953065  | 0,71486678 | <b>1,64133165</b>  | 2,37199967 | 5,97605547 | 0,0145014   | 0,04894835   | protein_coding       |
| ENSMUSG00000042759  | Apob          | apolipoprotein B receptor [Source:MGI Symbol;Acc:MGI:2176230]                                                          |        | 78,53137039 | 0,71482937 | <b>1,64128909</b>  | 6,29927815 | 29,2803307 | 6,2628E-08  | 8,0012E-07   | protein_coding       |
| ENSMUSG00000028184  | Lphn2         | latrophilin 2 [Source:MGI Symbol;Acc:MGI:2139714]                                                                      |        | 114,9478428 | 0,71451576 | <b>1,64093235</b>  | 6,84921839 | 26,0890991 | 3,26019E-07 | 3,86405E-06  | protein_coding       |
| ENSMUSG00000057531  | Dtnbp1        | dystrobrevin binding protein 1 [Source:MGI Symbol;Acc:MGI:2137586]                                                     |        | 62,66278303 | 0,71387646 | <b>1,64020536</b>  | 5,97003017 | 21,4701419 | 3,59381E-06 | 3,47887E-05  | protein_coding       |
| ENSMUSG00000024527  | Afg3l2        | AFG3(ATPase family gene 3)-like 2 (yeast) [Source:MGI Symbol;Acc:MGI:1916847]                                          |        | 71,80784503 | 0,71316083 | <b>1,63939196</b>  | 6,1679907  | 23,9700813 | 9,78444E-07 | 1,07073E-05  | protein_coding       |
| ENSMUSG00000002871  | Tpra1         | transmembrane protein, adipocyte associated 1 [Source:MGI Symbol;Acc:MGI:1345190]                                      |        | 46,90159899 | 0,7112187  | <b>1,63718653</b>  | 5,55357514 | 18,9126798 | 1,3684E-05  | 0,000115562  | protein_coding       |
| ENSMUSG000000021306 | Gpr137b       | G protein-coupled receptor 137B [Source:MGI Symbol;Acc:MGI:1891463]                                                    |        | 272,258747  | 0,710613   | <b>1,63649932</b>  | 6,08896726 | 14,4533329 | 0,000143675 | 0,000939061  | protein_coding       |
| ENSMUSG00000024197  | Plin3         | perilipin 3 [Source:MGI Symbol;Acc:MGI:1914155]                                                                        |        | 92,96652908 | 0,70958059 | <b>1,63532864</b>  | 6,53938019 | 23,3230131 | 1,6952E-06  | 1,44265E-05  | protein_coding       |
| ENSMUSG00000079334  | Nat6          | N-acetyltransferase 6 [Source:MGI Symbol;Acc:MGI:1888902]                                                              |        | 25,64241831 | 0,70954742 | <b>1,63529104</b>  | 4,67845578 | 19,2070579 | 1,17279E-05 | 0,00010012   | protein_coding       |
| ENSMUSG00000023074  | Mospd1        | motile sperm domain containing 1 [Source:MGI Symbol;Acc:MGI:1917630]                                                   |        | 8,547110848 | 0,70894755 | <b>1,63461123</b>  | 3,1073367  | 7,17425127 | 0,007395731 | 0,028175067  | protein_coding       |
| ENSMUSG00000020190  | Mknk2         | MAP kinase-interacting serine/threonine kinase 2 [Source:MGI Symbol;Acc:MGI:894279]                                    |        | 99,4402503  | 0,70816966 | <b>1,6337301</b>   | 6,63352784 | 28,8348744 | 7,8819E-08  | 1,0581E-06   | protein_coding       |
| ENSMUSG00000028920  | Fbxo42        | F-box protein 42 [Source:MGI Symbol;Acc:MGI:1924992]                                                                   |        | 44,74151933 | 0,70735554 | <b>1,63280844</b>  | 5,48919469 | 24,2588674 | 8,42181E-07 | 9,3465E-06   | protein_coding       |
| ENSMUSG00000019810  | Fuca2         | fucosidase,                                                                                                            |        |             |            |                    |            |            |             |              |                      |

|                     |            |                                                                                                                                                   |        |             |            |                   |            |              |              |              |                |
|---------------------|------------|---------------------------------------------------------------------------------------------------------------------------------------------------|--------|-------------|------------|-------------------|------------|--------------|--------------|--------------|----------------|
| ENSMUSG00000038642  | Ctss       | cathepsin S [Source:MGI Symbol;Acc:MGI:107341]                                                                                                    | Sheet1 | 1132,532188 | 0,69670981 | <b>1,62080419</b> | 10,1453548 | 11,2589192   | 0,000792413  | 0,00420301   | protein_coding |
| ENSMUSG00000059316  | Slc27a4    | solute carrier family 27 (fatty acid transporter), member 4 [Source:MGI Symbol;Acc:MGI:1347347]                                                   |        | 24,09778606 | 0,69659978 | <b>1,62068059</b> | 4,59597427 | 20,1772526   | 7,05874E-06  | 6,35171E-05  | protein_coding |
| ENSMUSG00000041075  | Fzd7       | frizzled homolog 7 (Drosophila) [Source:MGI Symbol;Acc:MGI:108570]                                                                                |        | 9,242024007 | 0,69508179 | <b>1,61897621</b> | 3,21659358 | 9,5036253    | 0,002050663  | 0,009575282  | protein_coding |
| ENSMUSG00000040151  | Hs2st1     | heparan sulfate 2-O-sulfotransferase 1 [Source:MGI Symbol;Acc:MGI:1346049]                                                                        |        | 38,24999637 | 0,69311684 | <b>1,61677267</b> | 5,26454483 | 23,5468323   | 1,2191E-06   | 1,29473E-05  | protein_coding |
| ENSMUSG00000028645  | Slc2a1     | solute carrier family 2 (facilitated glucose transporter), member 1 [Source:MGI Symbol;Acc:MGI:95755]                                             |        | 101,2674511 | 0,69253221 | <b>1,61611763</b> | 6,66407519 | 20,9376054   | 4,74488E-06  | 4,46718E-05  | protein_coding |
| ENSMUSG00000079442  | St6galnac4 | ST6 (alpha-N-acetyl-neuraminyl-2,3-beta-galactosyl-1,3)-N-acetylgalactosaminide alpha-2,6-sialyltransferase 4 [Source:MGI Symbol;Acc:MGI:1354724] |        | 43,66173928 | 0,69244781 | <b>1,61602309</b> | 5,44987479 | 22,5434528   | 2,05444E-06  | 2,08728E-05  | protein_coding |
| ENSMUSG00000048279  | Sacs       | sacsin [Source:MGI Symbol;Acc:MGI:1354724]                                                                                                        |        | 19,37130482 | 0,69200972 | <b>1,61553244</b> | 4,28070518 | 15,896546    | 6,69007E-05  | 0,000477608  | protein_coding |
| ENSMUSG00000027883  | Gpms2      | G-protein signalling modulator 2 (AGS3-like, C. elegans) [Source:MGI Symbol;Acc:MGI:1923373]                                                      |        | 10,07994085 | 0,69183101 | <b>1,61533233</b> | 3,34396956 | 9,29467111   | 0,002298214  | 0,010542997  | protein_coding |
| ENSMUSG00000056952  | Tatdn2     | TatD NBase domain containing 2 [Source:MGI Symbol;Acc:MGI:3576210]                                                                                |        | 76,77855273 | 0,69159447 | <b>1,61506751</b> | 6,26268186 | 24,7341591   | 6,58074E-07  | 7,07178E-06  | protein_coding |
| ENSMUSG00000025810  | Nrp1       | neuropilin 1 [Source:MGI Symbol;Acc:MGI:106206]                                                                                                   |        | 129,161475  | 0,69123785 | <b>1,61466833</b> | 7,01324083 | 21,4516654   | 3,62861E-06  | 3,50638E-05  | protein_coding |
| ENSMUSG00000024187  | Iltfg      | integrin alpha FG-GAP repeat containing 3 [Source:MGI Symbol;Acc:MGI:2146854]                                                                     |        | 119,9148261 | 0,6897996  | <b>1,61305944</b> | 6,90726782 | 22,4961962   | 2,1056E-06   | 2,13022E-05  | protein_coding |
| ENSMUSG00000028247  | Coq3       | coenzyme Q3 homolog, methyltransferase (yeast) [Source:MGI Symbol;Acc:MGI:101813]                                                                 |        | 11,41738045 | 0,68949762 | <b>1,61272183</b> | 3,52728517 | 8,10160848   | 0,004422599  | 0,018250431  | protein_coding |
| ENSMUSG00000026437  | Cdk18      | cyclin-dependent kinase 18 [Source:MGI Symbol;Acc:MGI:97518]                                                                                      |        | 240,5478614 | 0,68917581 | <b>1,61236214</b> | 7,91028722 | 17,6013608   | 2,72393E-05  | 0,000213761  | protein_coding |
| ENSMUSG00000046985  | Tap11      | transmembrane anterior posterior transformation 1 [Source:MGI Symbol;Acc:MGI:2683537]                                                             |        | 26,74235965 | 0,68892016 | <b>1,61207644</b> | 4,75095125 | 17,3198913   | 3,15863E-05  | 0,000243707  | protein_coding |
| ENSMUSG00000016520  | Lnx2       | ligand of numb-protein X 2 [Source:MGI Symbol;Acc:MGI:2155959]                                                                                    |        | 9,00617488  | 0,68837289 | <b>1,61146504</b> | 3,18170235 | 9,26584186   | 0,002334671  | 0,010692386  | protein_coding |
| ENSMUSG00000028692  | Akr1a1     | aldo-keto reductase family 1, member A1 (aldehyde reductase) [Source:MGI Symbol;Acc:MGI:1929955]                                                  |        | 1251,708745 | 0,68604836 | <b>1,60887667</b> | 10,2897233 | 10,7397477   | 0,001048586  | 0,005348569  | protein_coding |
| ENSMUSG00000048216  | Gpr85      | G protein-coupled receptor 85 [Source:MGI Symbol;Acc:MGI:1927851]                                                                                 |        | 21,41443843 | 0,68434925 | <b>1,60697697</b> | 4,43356514 | 15,6224955   | 7,73291E-05  | 0,000544975  | protein_coding |
| ENSMUSG00000021281  | Tnfrsf2    | tumor necrosis factor, alpha-induced protein 2 [Source:MGI Symbol;Acc:MGI:104960]                                                                 |        | 374,6732587 | 0,68376371 | <b>1,60632488</b> | 8,54993842 | 18,3528482   | 1,83544E-05  | 0,000150493  | protein_coding |
| ENSMUSG00000022799  | Arhgap31   | Rho GTPase activating protein 31 [Source:MGI Symbol;Acc:MGI:1333857]                                                                              |        | 101,0743762 | 0,68330025 | <b>1,60580894</b> | 6,66158101 | 27,2114108   | 1,82379E-07  | 2,25399E-06  | protein_coding |
| ENSMUSG00000037890  | Wdr19      | WD repeat domain 19 [Source:MGI Symbol;Acc:MGI:2443231]                                                                                           |        | 7,58223987  | 0,68303827 | <b>1,60551737</b> | 2,91670118 | 7,91783089   | 0,00984993   | 0,01833671   | protein_coding |
| ENSMUSG00000041654  | Slc39a11   | solute carrier family 39 (metal ion transporter), member 11 [Source:MGI Symbol;Acc:MGI:1917056]                                                   |        | 38,50534097 | 0,68157757 | <b>1,60389263</b> | 5,27160448 | 16,0294666   | 6,26556E-05  | 0,000450204  | protein_coding |
| ENSMUSG00000042694  | Obfc1      | oligonucleotide/oligosaccharide-binding fold containing 1 [Source:MGI Symbol;Acc:MGI:1915581]                                                     |        | 6,230588856 | 0,68131784 | <b>1,60367123</b> | 2,65081928 | 6,33456049   | 0,011840745  | 0,0041790643 | protein_coding |
| ENSMUSG00000022353  | Mtss1      | metastasis suppressor 1 [Source:MGI Symbol;Acc:MGI:2384818]                                                                                       |        | 130,8836353 | 0,68099531 | <b>1,60324544</b> | 7,03184418 | 22,7141965   | 1,87974E-06  | 1,93016E-05  | protein_coding |
| ENSMUSG00000021224  | Numb       | numb gene homolog (Drosophila) [Source:MGI Symbol;Acc:MGI:107423]                                                                                 |        | 42,83322667 | 0,68072977 | <b>1,60295038</b> | 5,4226225  | 21,0933084   | 4,37453E-06  | 4,14751E-05  | protein_coding |
| ENSMUSG00000068220  | Lgals1     | lectin, galactose binding, soluble 1 [Source:MGI Symbol;Acc:MGI:96777]                                                                            |        | 695,7002364 | 0,68056532 | <b>1,60276767</b> | 9,44258331 | 12,5782789   | 0,000390256  | 0,002262661  | protein_coding |
| ENSMUSG00000039680  | Mrps6      | mitochondrial ribosomal protein S6 [Source:MGI Symbol;Acc:MGI:2153111]                                                                            |        | 14,93529109 | 0,68018909 | <b>1,60234976</b> | 3,89667918 | 14,3089912   | 0,000155123  | 0,001004915  | protein_coding |
| ENSMUSG00000009772  | Nuak2      | NUAK family, SNF1-like kinase, 2 [Source:MGI Symbol;Acc:MGI:1921387]                                                                              |        | 22,66129408 | 0,6801747  | <b>1,60233377</b> | 4,50106131 | 16,3924943   | 5,14887E-05  | 0,000378072  | protein_coding |
| ENSMUSG00000036986  | Pml        | promyelocytic leukemia [Source:MGI Symbol;Acc:MGI:104662]                                                                                         |        | 53,92029611 | 0,68017004 | <b>1,6023286</b>  | 5,75648344 | 22,6522404   | 1,94134E-06  | 1,98414E-05  | protein_coding |
| ENSMUSG00000040552  | C3ar1      | complement component 3a receptor 1 [Source:MGI Symbol;Acc:MGI:1097680]                                                                            |        | 1292,854051 | 0,6798263  | <b>1,60194687</b> | 10,3364736 | 10,4427251   | 0,001228305  | 0,006128696  | protein_coding |
| ENSMUSG00000057789  | Bak1       | BCL2-antagonist/killer 1 [Source:MGI Symbol;Acc:MGI:1097161]                                                                                      |        | 66,86877442 | 0,67766346 | <b>1,60159547</b> | 6,06598968 | 23,769589    | 1,08585E-06  | 1,16848E-05  | protein_coding |
| ENSMUSG00000026384  | Ptpn4      | protein tyrosine phosphatase, non-receptor type 4 [Source:MGI Symbol;Acc:MGI:1099792]                                                             |        | 5,925622387 | 0,67555327 | <b>1,59720918</b> | 2,56271089 | 6,13852496   | 0,01322676   | 0,045470092  | protein_coding |
| ENSMUSG00000050222  | Amz1       | archaealysin family metalloproteinase 1 [Source:MGI Symbol;Acc:MGI:2442258]                                                                       |        | 17,59108555 | 0,67377131 | <b>1,59523759</b> | 4,13757552 | 10,5730873   | 0,001147459  | 0,005769856  | protein_coding |
| ENSMUSG00000029267  | Mtf2       | metal response element binding transcription factor 2 [Source:MGI Symbol;Acc:MGI:105050]                                                          |        | 31,44413661 | 0,67197835 | <b>1,59325628</b> | 4,98163964 | 17,8292985   | 2,41634E-05  | 0,000192259  | protein_coding |
| ENSMUSG00000043154  | Ppp2r3a    | protein phosphatase 2, regulatory subunit B', alpha [Source:MGI Symbol;Acc:MGI:2442104]                                                           |        | 7,592525339 | 0,67130933 | <b>1,59251761</b> | 2,91937851 | 6,47347395   | 0,010949629  | 0,039110395  | protein_coding |
| ENSMUSG00000017466  | Timpt      | tissue inhibitor of metalloproteinase 2 [Source:MGI Symbol;Acc:MGI:98753]                                                                         |        | 252,8449013 | 0,67061999 | <b>1,59175687</b> | 7,98185222 | 15,7286218   | 7,31095E-05  | 0,000518898  | protein_coding |
| ENSMUSG00000025154  | Arhgap19   | Rho GTPase activating protein 19 [Source:MGI Symbol;Acc:MGI:1918335]                                                                              |        | 74,05523056 | 0,66970723 | <b>1,59075012</b> | 6,21167315 | 18,9769229   | 1,32309E-05  | 0,000111994  | protein_coding |
| ENSMUSG00000040746  | Rnf187     | ring finger protein 187 [Source:MGI Symbol;Acc:MGI:1917760]                                                                                       |        | 14,03956092 | 0,66856132 | <b>1,58948711</b> | 3,79385421 | 13,0554898   | 0,000302397  | 0,001798827  | protein_coding |
| ENSMUSG00000018378  | Cuedc1     | CUE domain containing 1 [Source:MGI Symbol;Acc:MGI:2444281]                                                                                       |        | 8,327558281 | 0,66795189 | <b>1,58881581</b> | 3,05106146 | 7,69394961   | 0,005540625  | 0,022120219  | protein_coding |
| ENSMUSG00000020189  | Ospb18     | oxysterol binding protein-like 8 [Source:MGI Symbol;Acc:MGI:2443807]                                                                              |        | 653,6781775 | 0,66707159 | <b>1,58784666</b> | 9,35255959 | 11,861395    | 0,000573096  | 0,003160947  | protein_coding |
| ENSMUSG00000042029  | Ncapp2     | non-SMC condensin II complex, subunit G2 [Source:MGI Symbol;Acc:MGI:1923294]                                                                      |        | 21,10804804 | 0,66678221 | <b>1,58752819</b> | 4,4035414  | 15,2292529   | 9,5217E-05   | 0,00065262   | protein_coding |
| ENSMUSG00000032265  | Fam46a     | family with sequence similarity 46, member A [Source:MGI Symbol;Acc:MGI:2670964]                                                                  |        | 35,95286452 | 0,66519648 | <b>1,58758423</b> | 5,17238824 | 22,1918021   | 2,46725E-06  | 2,46882E-05  | protein_coding |
| ENSMUSG00000029657  | Hsph1      | heat shock 105kDa/110kDa protein 1 [Source:MGI Symbol;Acc:MGI:105053]                                                                             |        | 45,0669262  | 0,66437934 | <b>1,5848863</b>  | 5,50415965 | 19,4750349   | 0,101923E-05 | 8,81755E-05  | protein_coding |
| ENSMUSG00000021175  | Cdca71     | cell division cycle associated 7 like [Source:MGI Symbol;Acc:MGI:2384982]                                                                         |        | 14,44557366 | 0,66358305 | <b>1,58401176</b> | 3,86111369 | 9,18949584   | 0,002434079  | 0,011085183  | protein_coding |
| ENSMUSG00000020629  | Adi1       | acireductone dioxygenase 1 [Source:MGI Symbol;Acc:MGI:2144928]                                                                                    |        | 27,849783   | 0,66321397 | <b>1,58360658</b> | 4,79875495 | 18,2501209   | 1,93714E-05  | 0,000157771  | protein_coding |
| ENSMUSG00000079834  | Tmlhe      | trimethyllysine hydroxylase, epsilon [Source:MGI Symbol;Acc:MGI:2180203]                                                                          |        | 17,16664793 | 0,66160487 | <b>1,5818413</b>  | 4,11120146 | 13,5384193   | 0,000233729  | 0,001435429  | protein_coding |
| ENSMUSG00000034908  | Sid2       | SID1 transmembrane family, member 2 [Source:MGI Symbol;Acc:MGI:2446134]                                                                           |        | 54,11264207 | 0,66031436 | <b>1,58042696</b> | 5,75957155 | 23,8584342   | 1,03687E-06  | 1,1257E-05   | protein_coding |
| ENSMUSG00000008435  | Rdh13      | retinol dehydrogenase 13 (all-trans and 9-cis) [Source:MGI Symbol;Acc:MGI:1918732]                                                                |        | 23,19566934 | 0,6591663  | <b>1,5791698</b>  | 4,53959762 | 15,9202429   | 6,60683E-05  | 0,000471972  | protein_coding |
| ENSMUSG00000025572  | Tmc6       | transmembrane channel-like gene family 6 [Source:MGI Symbol;Acc:MGI:1098686]                                                                      |        | 17,15854727 | 0,65912993 | <b>1,57912998</b> | 4,09466737 | 15,0621248   | 0,00010403   | 0,000708413  | protein_coding |
| ENSMUSG00000035232  | Pdk3       | pyruvate dehydrogenase kinase, isoenzyme 3 [Source:MGI Symbol;Acc:MGI:2384308]                                                                    |        | 9,239191376 | 0,65908671 | <b>1,57908268</b> | 3,22909212 | 8,09155581   | 0,004447197  | 0,018327589  | protein_coding |
| ENSMUSG00000096370  |            | RNA-binding protein 4 [Source:UniProtKB/Swiss-Prot;Acc:Q8C7Q4]                                                                                    |        | 10,22480881 | 0,65705464 | <b>1,57686006</b> | 3,35700771 | 8,58277797   | 0,003393572  | 0,014667656  | protein_coding |
| ENSMUSG00000078780  | Gm5150     | predicted gene 5150 [Source:MGI Symbol;Acc:MGI:3779469]                                                                                           |        | 26,26410398 | 0,65618593 | <b>1,57591085</b> | 4,74347299 | 18,6395878   | 1,57907E-05  | 0,000132135  | protein_coding |
| ENSMUSG000000031788 | Kifc3      | kinesin family member C3 [Source:MGI Symbol;Acc:MGI:109202]                                                                                       |        | 13,72667195 | 0,65505696 | <b>1,57467813</b> | 3,76302298 | 11,9680587   | 0,000541203  | 0,00300313   | protein_coding |
| ENSMUSG00000037885  | Stk35      | serine/threonine kinase 35 [Source:MGI Symbol;Acc:MGI:1914583]                                                                                    |        | 31,82515792 | 0,65492344 | <b>1,5745324</b>  | 4,99651522 | 19,8504775   | 8,35419E-06  | 7,39625E-05  | protein_coding |
| ENSMUSG00000020888  | Dvl2       | dishevelled 2, dsh homolog (Drosophila) [Source:MGI Symbol;Acc:MGI:106613]                                                                        |        | 15,98319633 | 0,65373022 | <b>1,57323067</b> | 3,99350296 | 13,8637014   | 0,000196558  | 0,00123405   | protein_coding |
| ENSMUSG00000039361  | Picalm     | phosphatidylinositol binding clathrin assembly protein [Source:MGI Symbol;Acc:MGI:2385902]                                                        |        | 399,881803  | 0,65325461 | <b>1,57271212</b> | 8,64419203 | 17,1700955   | 3,41774E-05  | 0,000260588  | protein_coding |
| ENSMUSG00000020472  | Zkscan17   | zinc finger with KRAB and SCAN domains 17 [Source:MGI Symbol;Acc:MGI:2679270]                                                                     |        | 11,30832776 | 0,64914112 | <b>1,56823439</b> | 3,50238936 | 9,60099674   | 0,001944718  | 0,009154505  | protein_coding |
| ENSMUSG00000021668  | Polk       | polymerase (DNA directed), kappa [Source:MGI Symbol;Acc:MGI:1349767]                                                                              |        | 22,35479494 | 0,64786395 | <b>1,56684661</b> | 4,48997004 | 10,6762782   | 0,000504567  | 0,005054567  | protein_coding |
| ENSMUSG00000030254  | Rad18      | RAD18 homolog (S. cerevisiae) [Source:MGI Symbol;Acc:MGI:1890476]                                                                                 |        | 7,760962166 | 0,64760181 | <b>1,56656194</b> | 2,97470465 | 6,73609042   | 0,009448146  | 0,034679209  | protein_coding |
| ENSMUSG00000034902  | Pip5k1c    | phosphatidylinositol-4-phosphate 5-kinase, type 1 gamma [Source:MGI Symbol;Acc:MGI:1298224]                                                       |        | 170,0607242 | 0,64622364 | <b>1,56506616</b> | 7,40881121 | 20,9481157   | 4,71892E-06  | 4,44655E-05  | protein_coding |
| ENSMUSG00000039357  | Fut11      | fucosyltransferase 11 [Source:MGI Symbol;Acc:MGI:1920318]                                                                                         |        | 11,72217714 | 0,64566251 | <b>1,56445755</b> | 3,54448999 | 10,6131794   | 0,001122845  | 0,00566423   | protein_coding |
| ENSMUSG00000026074  | Map4k4     | mitogen-activated protein kinase kinase kinase kinase 4 [Source:MGI Symbol;Acc:MGI:1349394]                                                       |        | 77,78770886 | 0,64555559 | <b>1,5643416</b>  | 6,28542762 | 21,7691384</ |              |              |                |



|                     |               |                                                                                                                    |        |              |            |                   |             |            |             |             |                |
|---------------------|---------------|--------------------------------------------------------------------------------------------------------------------|--------|--------------|------------|-------------------|-------------|------------|-------------|-------------|----------------|
| ENSMUSG00000022992  | Kansl2        | KAT8 regulatory NSL complex subunit 2 [Source:MGI Symbol;Acc:MGI:1916862]                                          | Sheet1 | 43,03109602  | 0,63918407 | <b>1,55744809</b> | 5,43299918  | 19,5679761 | 9,70829E-06 | 8,45206E-05 | protein_coding |
| ENSMUSG00000015711  | Prune         | prune homologue (Drosophila) [Source:MGI Symbol;Acc:MGI:1925152]                                                   |        | 20,68427599  | 0,63886393 | <b>1,55710252</b> | 4,37297511  | 15,3202645 | 9,07379E-05 | 0,000626217 | protein_coding |
| ENSMUSG00000029456  | Acad10        | acyl-Coenzyme A dehydrogenase family, member 10 [Source:MGI Symbol;Acc:MGI:1919235]                                |        | 6,524612726  | 0,63843102 | <b>1,55663534</b> | 2,1900728   | 6,13503294 | 0,013252908 | 0,04554573  | protein_coding |
| ENSMUSG00000028617  | Lrrc42        | acyline rich repeat containing 42 [Source:MGI Symbol;Acc:MGI:1925059]                                              |        | 16,47300525  | 0,63651463 | <b>1,55456898</b> | 4,06249034  | 12,1492947 | 0,000491084 | 0,07671169  | protein_coding |
| ENSMUSG00000032815  | Fanca         | Fanconi anemia, complementation group A [Source:MGI Symbol;Acc:MGI:1341823]                                        |        | 7,803605748  | 0,63576573 | <b>1,55376222</b> | 2,98057295  | 6,48879389 | 0,010855661 | 0,03883329  | protein_coding |
| ENSMUSG00000015688  | Lpl           | lipoprotein lipase [Source:MGI Symbol;Acc:MGI:96820]                                                               |        | 2598,259155  | 0,6345278  | <b>1,55242956</b> | 11,3433551  | 6,06467798 | 0,01379119  | 0,047042472 | protein_coding |
| ENSMUSG00000020806  | Rhbdf2        | rhomboid 5 homolog 2 (Drosophila) [Source:MGI Symbol;Acc:MGI:2442473]                                              |        | 71,46537771  | 0,63352856 | <b>1,55135468</b> | 6,16584731  | 18,6218753 | 1,59381E-05 | 0,000133165 | protein_coding |
| ENSMUSG00000033526  | Ppip5k1       | diphosphoinositol pentakisphosphate kinase 1 [Source:MGI Symbol;Acc:MGI:2443281]                                   |        | 18,82467592  | 0,63350957 | <b>1,55133424</b> | 4,23327925  | 15,0487139 | 0,000104772 | 0,000710275 | protein_coding |
| ENSMUSG00000027695  | Plid1         | phospholipase D1 [Source:MGI Symbol;Acc:MGI:109585]                                                                |        | 17,79830734  | 0,63126021 | <b>1,5489174</b>  | 4,1634014   | 14,6139601 | 0,000131934 | 0,000871126 | protein_coding |
| ENSMUSG00000032300  | 1700017B05Rik | RIKEN cDNA 1700017B05 gene [Source:MGI Symbol;Acc:MGI:1921461]                                                     |        | 86,65466002  | 0,62950242 | <b>1,54703133</b> | 6,43839312  | 17,3314654 | 3,13945E-05 | 0,000242568 | protein_coding |
| ENSMUSG00000006050  | Sra1          | steroid receptor RNA activator 1 [Source:MGI Symbol;Acc:MGI:1344414]                                               |        | 34,64812398  | 0,62916104 | <b>1,54666531</b> | 5,11982981  | 19,5953766 | 9,57005E-06 | 8,33831E-05 | protein_coding |
| ENSMUSG00000041779  | Tram2         | translocating chain-associating membrane protein 2 [Source:MGI Symbol;Acc:MGI:1924817]                             |        | 9,941872394  | 0,62661271 | <b>1,54393575</b> | 3,32258143  | 8,34542744 | 0,003866592 | 0,016339325 | protein_coding |
| ENSMUSG00000055912  | Tmem150a      | transmembrane protein 150A [Source:MGI Symbol;Acc:MGI:2385244]                                                     |        | 9,251613472  | 0,62566676 | <b>1,54292375</b> | 3,21153533  | 7,75679022 | 0,005351097 | 0,021457119 | protein_coding |
| ENSMUSG00000054499  | Dedd2         | death effector domain-containing DNA binding protein 2 [Source:MGI Symbol;Acc:MGI:1914629]                         |        | 8,125324409  | 0,62539311 | <b>1,5426311</b>  | 3,02020297  | 6,59528818 | 0,0102249   | 0,037088472 | protein_coding |
| ENSMUSG00000021094  | Dhrs7         | dehydrogenase/reductase (SDR family) member 7 [Source:MGI Symbol;Acc:MGI:1913625]                                  |        | 15,28077058  | 0,62537585 | <b>1,54261265</b> | 3,92790488  | 12,0615338 | 0,000514729 | 0,002876567 | protein_coding |
| ENSMUSG000000057137 | Tmem140       | transmembrane protein 140 [Source:MGI Symbol;Acc:MGI:1915737]                                                      |        | 39,18361627  | 0,6240833  | <b>1,5412312</b>  | 5,29239953  | 16,9197891 | 3,8993E-05  | 0,000293636 | protein_coding |
| ENSMUSG00000028967  | Erfri1        | ERBB receptor feedback inhibitor 1 [Source:MGI Symbol;Acc:MGI:1921405]                                             |        | 11,41856973  | 0,62128196 | <b>1,53824143</b> | 3,54086825  | 7,05804209 | 0,007891019 | 0,002982409 | protein_coding |
| ENSMUSG000000022623 | Trio          | triple functional domain (PTPRF interacting) [Source:MGI Symbol;Acc:MGI:1927230]                                   |        | 101,7295873  | 0,62002237 | <b>1,53689901</b> | 6,66752133  | 20,3724891 | 6,37396E-06 | 5,80204E-05 | protein_coding |
| ENSMUSG00000006301  | Tmbim1        | transmembrane BAX inhibitor motif containing 1 [Source:MGI Symbol;Acc:MGI:1916910]                                 |        | 104,5865247  | 0,6183425  | <b>1,53511049</b> | 6,71078745  | 20,2749645 | 6,70725E-06 | 6,07523E-05 | protein_coding |
| ENSMUSG00000019990  | Pde7b         | phosphodiesterase 7B [Source:MGI Symbol;Acc:MGI:1352752]                                                           |        | 15,33121452  | 0,61802863 | <b>1,53477656</b> | 3,94726562  | 8,14687914 | 0,004313533 | 0,017904341 | protein_coding |
| ENSMUSG000000048719 | Tbc1d12       | TBC1D12: TBC1 domain family, member 12 [Source:MGI Symbol;Acc:MGI:2384803]                                         |        | 10,09027009  | 0,61748851 | <b>1,53420207</b> | 3,34443686  | 8,13314105 | 0,004346339 | 0,017999707 | protein_coding |
| ENSMUSG00000056290  | 4922501C03Rik | RIKEN cDNA 4922501C03 gene [Source:MGI Symbol;Acc:MGI:1925343]                                                     |        | 17,39946489  | 0,61744666 | <b>1,53415756</b> | 4,12606485  | 11,5400489 | 0,000681128 | 0,003682854 | protein_coding |
| ENSMUSG00000053581  | Zfand2a       | zinc finger, AN1-type domain 2A [Source:MGI Symbol;Acc:MGI:2140729]                                                |        | 78,32041923  | 0,61697337 | <b>1,53365435</b> | 6,29248161  | 17,8209507 | 2,42696E-05 | 0,000192945 | protein_coding |
| ENSMUSG00000031639  | Thr3          | toil-like receptor 3 [Source:MGI Symbol;Acc:MGI:2156367]                                                           |        | 13,10335391  | 0,61518941 | <b>1,53175909</b> | 3,71966152  | 8,61508909 | 0,003333895 | 0,014460917 | protein_coding |
| ENSMUSG00000025417  | Pip4k2c       | phosphatidylinositol-5-phosphate 4-kinase, type II, gamma [Source:MGI Symbol;Acc:MGI:2152214]                      |        | 61,76619108  | 0,61504488 | <b>1,53160946</b> | 5,95167263  | 16,5587541 | 4,71657E-05 | 0,000348728 | protein_coding |
| ENSMUSG00000049232  | Tigd2         | tigger transposable element derived 2 [Source:MGI Symbol;Acc:MGI:1915390]                                          |        | 14,8681829   | 0,61501101 | <b>1,53156968</b> | 3,90046723  | 10,9896206 | 0,000916236 | 0,004757411 | protein_coding |
| ENSMUSG00000030172  | Erc1          | ELKS/RAB6-interacting/CAST family member 1 [Source:MGI Symbol;Acc:MGI:2151013]                                     |        | 18,58500721  | 0,6142377  | <b>1,53074896</b> | 4,23062849  | 9,24994649 | 0,002655023 | 0,010776609 | protein_coding |
| ENSMUSG00000001227  | Sema6b        | sema domain, transmembrane domain (TM), and cytoplasmic domain, (semaphorin) 6B [Source:MGI Symbol;Acc:MGI:1       |        | 10,21042952  | 0,61159048 | <b>1,52794274</b> | 3,34658519  | 8,00709636 | 0,004659439 | 0,019094576 | protein_coding |
| ENSMUSG00000002927  | Dbf4          | DBF4 homolog (S. cerevisiae) [Source:MGI Symbol;Acc:MGI:1351328]                                                   |        | 18,44153411  | 0,61157898 | <b>1,52793056</b> | 4,21337419  | 11,1839304 | 0,000825088 | 0,004348645 | protein_coding |
| ENSMUSG000000119960 | Dusp6         | dual specificity phosphatase 6 [Source:MGI Symbol;Acc:MGI:1914853]                                                 |        | 17,88391566  | 0,61128861 | <b>1,52762307</b> | 4,16974586  | 12,2733905 | 0,000459463 | 0,002607499 | protein_coding |
| ENSMUSG00000079043  | Fastkd5       | FAST kinase domains 5 [Source:MGI Symbol;Acc:MGI:2139469]                                                          |        | 9,240114993  | 0,61103883 | <b>1,52735861</b> | 3,2216281   | 7,36434695 | 0,006652976 | 0,025783508 | protein_coding |
| ENSMUSG00000009035  | Tmem184b      | transmembrane protein 184b [Source:MGI Symbol;Acc:MGI:2445179]                                                     |        | 71,60501374  | 0,61072471 | <b>1,52702608</b> | 6,16286707  | 16,4135584 | 5,09197E-05 | 0,000374719 | protein_coding |
| ENSMUSG00000049323  | Smcr8         | Smith-Magenis syndrome chromosome region, candidate 8 homolog (human) [Source:MGI Symbol;Acc:MGI:2444720]          |        | 159,3123565  | 0,61041225 | <b>1,5266954</b>  | 7,31717328  | 21,153472  | 4,23933E-06 | 4,00827E-05 | protein_coding |
| ENSMUSG00000026979  | Psd4          | pleckstrin and Sec7 domain containing 4 [Source:MGI Symbol;Acc:MGI:2674093]                                        |        | 131,1799197  | 0,61027519 | <b>1,52655036</b> | 7,0359462   | 20,1234121 | 7,26025E-06 | 6,50671E-05 | protein_coding |
| ENSMUSG00000049225  | Pdp1          | pyruvate dehydrogenase phosphatase catalytic subunit 1 [Source:MGI Symbol;Acc:MGI:2685870]                         |        | 19,92238069  | 0,61019582 | <b>1,52646639</b> | 4,32756809  | 11,919797  | 0,000555405 | 0,003069536 | protein_coding |
| ENSMUSG00000021510  | A530054K11Rik | RIKEN cDNA A530054K11 gene [Source:MGI Symbol;Acc:MGI:3036250]                                                     |        | 18,30009573  | 0,61015096 | <b>1,52641892</b> | 4,1950944   | 12,1497801 | 0,000490937 | 0,002761169 | protein_coding |
| ENSMUSG00000029924  | Slc37a3       | solute carrier family 37 (glycerol-3-phosphate transporter), member 3 [Source:MGI Symbol;Acc:MGI:1919394]          |        | 13,31933741  | 0,60826806 | <b>1,52442805</b> | 3,74559047  | 8,58915984 | 0,0033817   | 0,01463361  | protein_coding |
| ENSMUSG00000041161  | Ottd3         | OTU domain containing 3 [Source:MGI Symbol;Acc:MGI:1920412]                                                        |        | 9,795329751  | 0,60709397 | <b>1,52318795</b> | 3,28783848  | 8,24951861 | 0,004076281 | 0,01707438  | protein_coding |
| ENSMUSG00000028744  | Pqjc2         | PQ loop repeat containing 2 [Source:MGI Symbol;Acc:MGI:2384837]                                                    |        | 25,04871539  | 0,60593415 | <b>1,52196391</b> | 4,65005779  | 14,1407782 | 0,000169627 | 0,001084297 | protein_coding |
| ENSMUSG000000031609 | Sap30         | sin3 associated polypeptide [Source:MGI Symbol;Acc:MGI:1929129]                                                    |        | 20,07801882  | 0,60430687 | <b>1,52024819</b> | 4,34337948  | 13,8265054 | 0,000200488 | 0,00125585  | protein_coding |
| ENSMUSG00000023079  | Gif2ird1      | general transcription factor II I repeat domain-containing 1 [Source:MGI Symbol;Acc:MGI:1861942]                   |        | 17,9829993   | 0,60403373 | <b>1,51996039</b> | 4,17613262  | 10,1243009 | 0,001463272 | 0,007145317 | protein_coding |
| ENSMUSG00000040820  | Hlcs          | holocarboxylase synthetase (biotin-[propionyl-Coenzyme A-carboxylase (ATP-hydrolysing)] ligase) [Source:MGI Symbol |        | 7,502566031  | 0,60391407 | <b>1,51983433</b> | 2,918225    | 6,25821011 | 0,012361904 | 0,043103852 | protein_coding |
| ENSMUSG00000029311  | Hsd17b11      | hydroxysteroid (17-beta) dehydrogenase 11 [Source:MGI Symbol;Acc:MGI:2149821]                                      |        | 44,14444789  | 0,60303054 | <b>1,51890385</b> | 5,46575567  | 15,637111  | 7,67337E-05 | 0,000541821 | protein_coding |
| ENSMUSG00000026643  | Nmt2          | N-methyltransferase 2 [Source:MGI Symbol;Acc:MGI:1202298]                                                          |        | 37,008979364 | 0,60297978 | <b>1,5188504</b>  | 5,21628762  | 17,8481892 | 2,39247E-05 | 0,000190894 | protein_coding |
| ENSMUSG00000037253  | Mex3c         | mex3 homolog C (C. elegans) [Source:MGI Symbol;Acc:MGI:2652843]                                                    |        | 44,29374017  | 0,60279009 | <b>1,51865072</b> | 5,47509314  | 19,1748808 | 1,19273E-05 | 0,000101585 | protein_coding |
| ENSMUSG00000027274  | Mkks          | McKusick-Kaufman syndrome [Source:MGI Symbol;Acc:MGI:1891836]                                                      |        | 19,99512047  | 0,60201059 | <b>1,51783039</b> | 4,33061343  | 13,4100395 | 0,002502081 | 0,001528538 | protein_coding |
| ENSMUSG00000011877  | Git1          | G protein-coupled receptor kinase-interactor 1 [Source:MGI Symbol;Acc:MGI:1927140]                                 |        | 73,57162462  | 0,60159195 | <b>1,51739002</b> | 6,2000661   | 18,5846383 | 1,62525E-05 | 0,00013538  | protein_coding |
| ENSMUSG00000036698  | Eif2c2        | eukaryotic translation initiation factor 2C, 2 [Source:MGI Symbol;Acc:MGI:2446632]                                 |        | 143,8960018  | 0,60146867 | <b>1,51726036</b> | 7,17006481  | 18,8217084 | 1,43524E-05 | 0,000121021 | protein_coding |
| ENSMUSG00000009569  | Mkl2          | MKL/myocardin-like 2 [Source:MGI Symbol;Acc:MGI:3050795]                                                           |        | 62,03432393  | 0,60059005 | <b>1,51633661</b> | 5,95650028  | 17,7820434 | 6,27047E-05 | 0,000196363 | protein_coding |
| ENSMUSG00000028673  | Fuca1         | fucosidase, alpha-L-1, tissue [Source:MGI Symbol;Acc:MGI:95593]                                                    |        | 96,91827669  | 0,60003939 | <b>1,51575795</b> | 6,59845805  | 18,5976188 | 1,61422E-05 | 0,000134563 | protein_coding |
| ENSMUSG00000021676  | Iqgap2        | IQ motif containing GTPase activating protein 2 [Source:MGI Symbol;Acc:MGI:2449975]                                |        | 58,8330914   | 0,5969939  | <b>1,51256161</b> | 5,88153253  | 15,6426082 | 7,65111E-05 | 0,000540596 | protein_coding |
| ENSMUSG00000047881  | Rel1          | RELT-like 1 [Source:MGI Symbol;Acc:MGI:2140767]                                                                    |        | 15,97479153  | 0,59698627 | <b>1,51253473</b> | 4,000153012 | 12,3600857 | 0,000438611 | 0,002498193 | protein_coding |
| ENSMUSG00000026159  | Afgf1         | ArfGAP with FG repeats 1 [Source:MGI Symbol;Acc:MGI:1333754]                                                       |        | 83,24663218  | 0,59620238 | <b>1,51171397</b> | 6,38528577  | 20,4387312 | 6,1571E-06  | 5,63265E-05 | protein_coding |
| ENSMUSG00000025355  | Mmp19         | matrix metalloproteinase 19 [Source:MGI Symbol;Acc:MGI:1927899]                                                    |        | 45,78372508  | 0,59561747 | <b>1,51119121</b> | 5,52241701  | 16,8963327 | 3,94778E-05 | 0,0029688   | protein_coding |
| ENSMUSG00000027630  | Tbl1xr1       | transducin (beta)-like 1X-linked receptor 1 [Source:MGI Symbol;Acc:MGI:2441730]                                    |        | 66,3772281   | 0,59525906 | <b>1,51074384</b> | 6,05020216  | 21,0930423 | 4,37514E-06 | 4,14751E-05 | protein_coding |
| ENSMUSG00000073016  | Uprt          | uracil phosphoribosyltransferase (FUR1) homolog (S. cerevisiae) [Source:MGI Symbol;Acc:MGI:2685620]                |        | 11,08484097  | 0,59505539 | <b>1,51053058</b> | 3,47164534  | 7,63076073 | 0,00573811  | 0,022776232 | protein_coding |
| ENSMUSG00000030323  | Ift122        | intraflagellar transport 122 [Source:MGI Symbol;Acc:MGI:1932386]                                                   |        | 8,278502254  | 0,59474341 | <b>1,51020396</b> | 3,05473338  | 6,56840876 | 0,010380472 | 0,037516528 | protein_coding |
| ENSMUSG00000056267  | Cep70         | centrosomal protein 70 [Source:MGI Symbol;Acc:MGI:1915371]                                                         |        | 7,886590631  | 0,59397312 | <b>1,50939784</b> | 2,9762181   | 5,99501022 | 0,014346398 | 0,048529518 | protein_coding |
| ENSMUSG00000052102  | Gnpda1        | glucosamine-6-phosphate deaminase 1 [Source:MGI Symbol;Acc:MGI:1347054]                                            |        | 124,029163   | 0,59312918 | <b>1,50851514</b> | 6,95533169  | 18,4667934 | 1,72891E-05 | 0,000143038 | protein_coding |
| ENSMUSG00000011752  | Pgam1         | phosphoglycerate mutase 1 [Source:MGI Symbol;Acc:MGI:97552]                                                        |        | 554,5506734  | 0,59270112 | <b>1,50806763</b> | 9,11540807  | 10,2286593 | 0,001382751 | 0,006794405 | protein_coding |
| ENSMUSG00000015536  | Mocs2         | molybdenum cofactor synthesis 2 [Source:MGI Symbol;Acc:MGI:1336894]                                                |        | 31,43289081  | 0,59206669 | <b>1,50796892</b> | 4,9         |            |             |             |                |

|                     |               |                                                                                                                           |             |            |                   |            |            |             |              |                |
|---------------------|---------------|---------------------------------------------------------------------------------------------------------------------------|-------------|------------|-------------------|------------|------------|-------------|--------------|----------------|
| ENSMUSG00000026509  | Capn2         | calpain 2 [Source:MGI Symbol;Acc:MGI:88264]                                                                               | 218,7096643 | 0,58534528 | <b>1,50039803</b> | 7,77337047 | 15,6348726 | 7,68247E-05 | 0,000542115  | protein_coding |
| ENSMUSG00000022335  | Zfat          | zinc finger and AT hook domain containing [Source:MGI Symbol;Acc:MGI:2681865]                                             | 13,87862457 | 0,58534081 | <b>1,50039339</b> | 3,79867046 | 8,3722122  | 0,003810016 | 0,01616241   | protein_coding |
| ENSMUSG00000025986  | Slc39a10      | solute carrier family 39 (zinc transporter), member 10 [Source:MGI Symbol;Acc:MGI:1914515]                                | 25,03512127 | 0,58441631 | <b>1,49943222</b> | 4,65372453 | 15,3479354 | 8,94186E-05 | 0,000619056  | protein_coding |
| ENSMUSG00000019066  | Rab3d         | RAB3D, member RAS oncogene family [Source:MGI Symbol;Acc:MGI:97844]                                                       | 24,81522457 | 0,58428328 | <b>1,49929396</b> | 4,63935629 | 13,913716  | 0,000191397 | 0,001207161  | protein_coding |
| ENSMUSG00000022514  | Il1rap        | interleukin 1 receptor accessory protein [Source:MGI Symbol;Acc:MGI:104975]                                               | 10,22609224 | 0,58418839 | <b>1,49919536</b> | 3,36675255 | 6,33360152 | 0,011847149 | 0,041799817  | protein_coding |
| ENSMUSG00000035133  | Arhgap5       | Rho GTPase activating protein 5 [Source:MGI Symbol;Acc:MGI:1332637]                                                       | 21,5704189  | 0,58350081 | <b>1,49848102</b> | 4,43209847 | 12,8240813 | 0,000342186 | 0,002090948  | protein_coding |
| ENSMUSG00000079252  | Tor1aip2      | torsin A interacting protein 2 [Source:MGI Symbol;Acc:MGI:3582695]                                                        | 121,150145  | 0,58224277 | <b>1,4971749</b>  | 6,92399301 | 15,3036366 | 9,15401E-05 | 0,00063017   | protein_coding |
| ENSMUSG00000028961  | Pgd           | phosphogluconate dehydrogenase [Source:MGI Symbol;Acc:MGI:97553]                                                          | 423,3900395 | 0,58208614 | <b>1,49701236</b> | 8,72637367 | 11,4702431 | 0,000707194 | 0,0003799483 | protein_coding |
| ENSMUSG00000046791  | 2410016006Rik | RIKEN cDNA 2410016006 gene [Source:MGI Symbol;Acc:MGI:1919202]                                                            | 10,93269506 | 0,58193711 | <b>1,49685773</b> | 3,45585811 | 7,31569781 | 0,006835485 | 0,026406989  | protein_coding |
| ENSMUSG00000039512  | Uhrf1bp1      | UHRF1 (ICBP90) binding protein 1 [Source:MGI Symbol;Acc:MGI:3041238]                                                      | 43,20521462 | 0,58158229 | <b>1,49648964</b> | 5,43378521 | 18,0367275 | 2,16684E-05 | 0,000174795  | protein_coding |
| ENSMUSG00000035969  | Rusc2         | RUN and SH3 domain containing 2 [Source:MGI Symbol;Acc:MGI:2140371]                                                       | 82,10331036 | 0,58131007 | <b>1,49620729</b> | 6,35943463 | 12,5178096 | 0,000403091 | 0,00232359   | protein_coding |
| ENSMUSG00000047534  | Mis18bp1      | MIS18 binding protein 1 [Source:MGI Symbol;Acc:MGI:2145099]                                                               | 9,107988098 | 0,57959101 | <b>1,49442554</b> | 3,19672255 | 6,27224587 | 0,012264359 | 0,042920632  | protein_coding |
| ENSMUSG00000051149  | Adnp          | activity-dependent neuroprotective protein [Source:MGI Symbol;Acc:MGI:1338758]                                            | 27,21808114 | 0,57884881 | <b>1,49365692</b> | 4,76761411 | 9,54115786 | 0,00200915  | 0,009405422  | protein_coding |
| ENSMUSG00000038178  | Slc43a2       | solute carrier family 43, member 2 [Source:MGI Symbol;Acc:MGI:2442746]                                                    | 365,0363087 | 0,57877704 | <b>1,49358261</b> | 8,51174316 | 12,8794843 | 0,000332204 | 0,001957063  | protein_coding |
| ENSMUSG00000016487  | Ppfbp1        | PTPRF interacting protein, binding protein 1 (liprin beta 1) [Source:MGI Symbol;Acc:MGI:1914783]                          | 75,15235452 | 0,57788904 | <b>1,49266357</b> | 6,2339365  | 15,268258  | 9,32708E-05 | 0,000640879  | protein_coding |
| ENSMUSG00000030223  | Ptpro         | protein tyrosine phosphatase, receptor type, O [Source:MGI Symbol;Acc:MGI:1097152]                                        | 22,38755627 | 0,57717354 | <b>1,49192347</b> | 4,49071483 | 10,236632  | 0,001376877 | 0,006768127  | protein_coding |
| ENSMUSG00000017774  | Myo1c         | myosin IC [Source:MGI Symbol;Acc:MGI:106612]                                                                              | 25,2161018  | 0,57709034 | <b>1,49183745</b> | 7,99031957 | 15,6971919 | 7,43344E-05 | 0,000527252  | protein_coding |
| ENSMUSG00000009418  | Nav1          | neuron navigator 1 [Source:MGI Symbol;Acc:MGI:2183683]                                                                    | 94,39898991 | 0,57661252 | <b>1,49134343</b> | 6,56278376 | 15,3122674 | 9,11228E-05 | 0,000628084  | protein_coding |
| ENSMUSG00000071547  | Nf5dc2        | 5'-nucleotidase domain containing 2 [Source:MGI Symbol;Acc:MGI:1917271]                                                   | 15,35697883 | 0,57659363 | <b>1,4913239</b>  | 3,94958162 | 8,41038434 | 0,003730838 | 0,015931098  | protein_coding |
| ENSMUSG00000015312  | Gadd45b       | growth arrest and DNA-damage-inducible 45 beta [Source:MGI Symbol;Acc:MGI:107776]                                         | 57,25206192 | 0,57617739 | <b>1,49098369</b> | 5,84096269 | 18,6016775 | 1,61079E-05 | 0,000134481  | protein_coding |
| ENSMUSG00000021279  | Cdc42bpb      | CDC42 binding protein kinase beta [Source:MGI Symbol;Acc:MGI:2136459]                                                     | 92,01966118 | 0,57600974 | <b>1,49072045</b> | 6,52456    | 17,5388919 | 2,1936E-05  | 0,000220003  | protein_coding |
| ENSMUSG00000021918  | Nek4          | NIMA (never in mitosis gene a)-related expressed kinase 4 [Source:MGI Symbol;Acc:MGI:1344404]                             | 10,0857577  | 0,57317361 | <b>1,49079279</b> | 3,33679643 | 7,38499347 | 0,000577031 | 0,025543244  | protein_coding |
| ENSMUSG00000079254  | Itrip         | inositol 1,4,5-triphosphate receptor interacting protein [Source:MGI Symbol;Acc:MGI:3042776]                              | 9,067437811 | 0,57265865 | <b>1,48726183</b> | 3,18598656 | 6,77158616 | 0,009262048 | 0,034102588  | protein_coding |
| ENSMUSG00000031360  | Ctsp2         | cytidine 5'-triphosphate synthase 2 [Source:MGI Symbol;Acc:MGI:1933185]                                                   | 37,23430659 | 0,57203316 | <b>1,48661716</b> | 5,22459003 | 15,3971446 | 8,71198E-05 | 0,000605431  | protein_coding |
| ENSMUSG00000039789  | Zfp597        | zinc finger protein 597 [Source:MGI Symbol;Acc:MGI:1918313]                                                               | 10,63381006 | 0,57001038 | <b>1,48453425</b> | 3,41246905 | 7,66280737 | 0,005637072 | 0,022409565  | protein_coding |
| ENSMUSG00000027469  | Tpx2          | TPX2, microtubule-associated protein homolog (Xenopus laevis) [Source:MGI Symbol;Acc:MGI:1919369]                         | 18,25970307 | 0,56838377 | <b>1,48286141</b> | 4,20259733 | 10,2569041 | 0,00136174  | 0,006697152  | protein_coding |
| ENSMUSG00000035469  | Rcbt1         | regulator of chromosome condensation (RCC1) and BTB (POZ) domain containing protein 1 [Source:MGI Symbol;Acc:MGI:1918313] | 29,83728009 | 0,56799792 | <b>1,48246487</b> | 4,90582221 | 12,4851861 | 0,000410192 | 0,00235798   | protein_coding |
| ENSMUSG00000002985  | ApoE          | apolipoprotein E [Source:MGI Symbol;Acc:MGI:88057]                                                                        | 1003,168218 | 0,56719583 | <b>1,4816409</b>  | 9,97038823 | 8,36833346 | 0,003818156 | 0,016180786  | protein_coding |
| ENSMUSG00000010663  | Fads1         | fatty acid desaturase 1 [Source:MGI Symbol;Acc:MGI:1923517]                                                               | 61,63681021 | 0,5668531  | <b>1,48128896</b> | 5,94579344 | 17,4076753 | 3,01606E-05 | 0,000233691  | protein_coding |
| ENSMUSG00000007659  | Bcl2l1        | BCL2-like 1 [Source:MGI Symbol;Acc:MGI:88139]                                                                             | 103,4980691 | 0,56675441 | <b>1,48118763</b> | 6,69555871 | 18,3176349 | 1,86968E-05 | 0,000152503  | protein_coding |
| ENSMUSG00000029446  | Psph          | phosphoserine phosphatase [Source:MGI Symbol;Acc:MGI:97788]                                                               | 10,16543427 | 0,56674724 | <b>1,48118028</b> | 3,35083175 | 6,63051847 | 0,010024608 | 0,03649449   | protein_coding |
| ENSMUSG00000021687  | Scamp1        | secretory carrier membrane protein 1 [Source:MGI Symbol;Acc:MGI:1349480]                                                  | 71,78794767 | 0,56616262 | <b>1,48058018</b> | 6,16991956 | 17,4004389 | 3,02756E-05 | 0,000234417  | protein_coding |
| ENSMUSG00000062232  | Rapgef2       | Rap guanine nucleotide exchange factor (GEF) 2 [Source:MGI Symbol;Acc:MGI:2659071]                                        | 122,6807447 | 0,56599482 | <b>1,48040799</b> | 6,94528822 | 18,0759977 | 2,1226E-05  | 0,000171604  | protein_coding |
| ENSMUSG00000046675  | Tmem251       | transmembrane protein 251 [Source:MGI Symbol;Acc:MGI:2443862]                                                             | 19,3778537  | 0,5655268  | <b>1,4799278</b>  | 4,27931139 | 9,80112347 | 0,001744053 | 0,008373791  | protein_coding |
| ENSMUSG00000074151  | Nlrc5         | NLR family, CARD domain containing 5 [Source:MGI Symbol;Acc:MGI:3612191]                                                  | 70,4673034  | 0,56374219 | <b>1,47809827</b> | 6,1409981  | 16,5540629 | 4,72826E-05 | 0,000349357  | lincRNA        |
| ENSMUSG00000040997  | Abhd4         | abhydrolase domain containing 4 [Source:MGI Symbol;Acc:MGI:1915938]                                                       | 63,27954467 | 0,56270351 | <b>1,47703448</b> | 5,98641759 | 14,8417003 | 0,000116921 | 0,000782678  | protein_coding |
| ENSMUSG00000026134  | Prim2         | DNA primase, p58 subunit [Source:MGI Symbol;Acc:MGI:97758]                                                                | 8,822168089 | 0,56235206 | <b>1,47667472</b> | 3,15632265 | 6,01629303 | 0,014174389 | 0,048051222  | protein_coding |
| ENSMUSG00000032846  | Zswim6        | zinc finger, SWIM domain containing 6 [Source:MGI Symbol;Acc:MGI:1914513]                                                 | 46,19513374 | 0,56227264 | <b>1,47659342</b> | 5,53700359 | 16,9230608 | 3,89258E-05 | 0,000293332  | protein_coding |
| ENSMUSG00000059689  | Zfp637        | zinc finger protein 637 [Source:MGI Symbol;Acc:MGI:2448537]                                                               | 10,27241861 | 0,56175447 | <b>1,47606318</b> | 3,3644606  | 7,18878415 | 0,007336067 | 0,027996308  | protein_coding |
| ENSMUSG00000024085  | Man2a1        | mannosidase 2, alpha 1 [Source:MGI Symbol;Acc:MGI:104669]                                                                 | 70,13277085 | 0,56172845 | <b>1,47603655</b> | 6,13535534 | 14,2862079 | 0,000157011 | 0,001014157  | protein_coding |
| ENSMUSG00000024529  | Lox           | lysyl oxidase [Source:MGI Symbol;Acc:MGI:96817]                                                                           | 304,0596486 | 0,56079838 | <b>1,4750853</b>  | 8,24864088 | 12,53286   | 0,000399857 | 0,02303737   | protein_coding |
| ENSMUSG00000006715  | Gmnn          | geminin [Source:MGI Symbol;Acc:MGI:1927344]                                                                               | 12,21435295 | 0,56056967 | <b>1,47485147</b> | 3,62283565 | 7,17084411 | 0,00740979  | 0,028218844  | protein_coding |
| ENSMUSG00000036833  | Pnpla7        | patatin-like phospholipase domain containing 7 [Source:MGI Symbol;Acc:MGI:2385325]                                        | 75,12178562 | 0,56046099 | <b>1,47474037</b> | 6,22917224 | 16,3954816 | 5,14077E-05 | 0,000377803  | protein_coding |
| ENSMUSG00000029156  | Sgcb          | sarcoglycan, beta (dystrophin-associated glycoprotein) [Source:MGI Symbol;Acc:MGI:1346523]                                | 18,88737692 | 0,55919457 | <b>1,47344638</b> | 4,24581455 | 10,3399917 | 0,001301786 | 0,006439767  | protein_coding |
| ENSMUSG00000023175  | Bsg           | basigin [Source:MGI Symbol;Acc:MGI:88208]                                                                                 | 179,3481716 | 0,55861315 | <b>1,4728527</b>  | 4,87765338 | 16,5663334 | 4,69776E-05 | 0,000347571  | protein_coding |
| ENSMUSG000000066150 | Slc31a1       | solute carrier family 31, member 1 [Source:MGI Symbol;Acc:MGI:1333843]                                                    | 113,5106309 | 0,55822221 | <b>1,47245353</b> | 6,8300401  | 18,1104373 | 2,08546E-05 | 0,000169526  | protein_coding |
| ENSMUSG00000051934  | Spats2        | spermatogenesis associated, serine-rich 2 [Source:MGI Symbol;Acc:MGI:1919822]                                             | 15,0526807  | 0,55732583 | <b>1,47153905</b> | 3,92499265 | 9,40366405 | 0,002165522 | 0,010043308  | protein_coding |
| ENSMUSG0000001482   | Def8          | differentially expressed in FDCP 8 [Source:MGI Symbol;Acc:MGI:1346331]                                                    | 35,50600095 | 0,55664966 | <b>1,47084952</b> | 5,15048418 | 13,3651695 | 0,00256341  | 0,001556031  | protein_coding |
| ENSMUSG00000025503  | Taldo1        | transaldolase 1 [Source:MGI Symbol;Acc:MGI:1274789]                                                                       | 234,1491879 | 0,55659014 | <b>1,47078884</b> | 7,87233238 | 11,285718  | 0,000781056 | 0,004149644  | protein_coding |
| ENSMUSG00000014778  | Fhod1         | formin homology 2 domain containing 1 [Source:MGI Symbol;Acc:MGI:2679008]                                                 | 19,48311487 | 0,55624827 | <b>1,47044036</b> | 4,28169233 | 11,4799327 | 0,000703517 | 0,003785279  | protein_coding |
| ENSMUSG00000024014  | Pim1          | proviral integration site 1 [Source:MGI Symbol;Acc:MGI:97584]                                                             | 92,61830242 | 0,55611692 | <b>1,47030649</b> | 6,53610803 | 18,631985  | 1,58538E-05 | 0,000132562  | protein_coding |
| ENSMUSG00000002250  | Ppard         | peroxisome proliferator activator receptor delta [Source:MGI Symbol;Acc:MGI:101884]                                       | 28,79276244 | 0,55497935 | <b>1,4691476</b>  | 4,84895649 | 12,5357462 | 0,00039924  | 0,002305019  | protein_coding |
| ENSMUSG00000033793  | Atp6a1        | ATPase, H+ transporting, lysosomal V1 subunit H [Source:MGI Symbol;Acc:MGI:1914864]                                       | 162,6795116 | 0,55429246 | <b>1,46844829</b> | 7,34747955 | 14,703933  | 0,000125784 | 0,000835037  | protein_coding |
| ENSMUSG00000056708  | Ier5          | immediate early response 5 [Source:MGI Symbol;Acc:MGI:1337027]                                                            | 85,88671141 | 0,55142542 | <b>1,46853297</b> | 6,42327097 | 15,9359072 | 6,55238E-05 | 0,000468997  | protein_coding |
| ENSMUSG00000034947  | Tmem106a      | transmembrane protein 106A [Source:MGI Symbol;Acc:MGI:1922056]                                                            | 229,7630424 | 0,55073276 | <b>1,46482951</b> | 7,84486981 | 13,9188298 | 0,000190877 | 0,001204573  | protein_coding |
| ENSMUSG00000061666  | Gdpd1         | glycerophosphodiester phosphodiesterase domain containing 1 [Source:MGI Symbol;Acc:MGI:1913819]                           | 23,07397402 | 0,54920353 | <b>1,46327764</b> | 4,53375304 | 12,1619571 | 0,000487742 | 0,002746703  | protein_coding |
| ENSMUSG00000001521  | Tulp3         | tubby-like protein 3 [Source:MGI Symbol;Acc:MGI:1329045]                                                                  | 12,83251221 | 0,54862238 | <b>1,46268832</b> | 3,69119734 | 7,03951813 | 0,007973048 | 0,030082376  | protein_coding |
| ENSMUSG00000029103  | Lrpap1        | low density lipoprotein receptor-related protein associated protein 1 [Source:MGI Symbol;Acc:MGI:96829]                   | 138,1940255 | 0,5485188  | <b>1,46258331</b> | 7,1113218  | 13,9216767 | 0,000190588 | 0,001203441  | protein_coding |
| ENSMUSG00000030314  | Atg7          | autophagy related 7 [Source:MGI Symbol;Acc:MGI:1921494]                                                                   | 60,38218057 | 0,54694091 | <b>1,46098454</b> | 5,91872783 | 14,883709  | 0,000114346 | 0,000767454  | protein_coding |
| ENSMUSG00000002814  | Top3a         | topoisomerase (DNA) III alpha [Source:MGI Symbol;Acc:MGI:1197527]                                                         | 21,30456146 | 0,54681103 | <b>1,46085228</b> | 4,41517259 | 11,8550903 | 0,000575039 | 0,003170075  | protein_coding |
| ENSMUSG00000032462  | Pik3cb        | phosphatidylinositol 3-kinase, catalytic, beta polypeptide [Source:MGI Symbol;Acc:MGI:1922019]                            | 47,24758897 | 0,54667437 | <b>1,46071464</b> | 5,56537793 | 11,8894723 | 0,000564521 | 0,003116781  | protein_coding |
| ENSMUSG00000050002  | Ildn          | idnK glucokinase homolog (E. coli) [Source:MGI Symbol;Acc:MGI:1922981]                                                    | 9,668813604 | 0,54667358 | <b>1,46071378</b> | 3,28619607 | 6,05078545 | 0,013900112 | 0,047311194  | protein_coding |
| ENSMUSG00000044345  | Marveld1      | MARVEL (membrane-associating) domain containing 1 [Source:MGI Symbol;Acc:MGI:2147570]                                     | 17,67314621 | 0,54576557 | <b>1,45979478</b> | 4,16204325 | 9,37303521 |             |              |                |

|                    |                |                                                                                                                         |        |              |            |                   |            |            |             |              |                |
|--------------------|----------------|-------------------------------------------------------------------------------------------------------------------------|--------|--------------|------------|-------------------|------------|------------|-------------|--------------|----------------|
| ENSMUSG00000066026 | Dhrs3          | dehydrogenase/reductase (SDR family) member 3 [Source:MGI Symbol;Acc:MGI:1315215]                                       | Sheet1 | 116,3354817  | 0,538709   | <b>1,452672</b>   | 6,86245219 | 17,2115764 | 3,34392E-05 | 0,000255847  | protein_coding |
| ENSMUSG00000022967 | Ifnar1         | interferon (alpha and beta) receptor 1 [Source:MGI Symbol;Acc:MGI:107658]                                               |        | 115,7469803  | 0,53787058 | <b>1,45182803</b> | 6,85678401 | 17,6357036 | 2,67519E-05 | 0,000210245  | protein_coding |
| ENSMUSG00000052566 | Hook2          | hook homolog 2 (Drosophila) [Source:MGI Symbol;Acc:MGI:2181664]                                                         |        | 24,40668872  | 0,53748669 | <b>1,45144177</b> | 4,61512766 | 10,5467983 | 0,001163895 | 0,005841808  | protein_coding |
| ENSMUSG00000028980 | H6pd           | hexose-6-phosphate dehydrogenase (glucose 1-dehydrogenase) [Source:MGI Symbol;Acc:MGI:2140356]                          |        | 69,47886828  | 0,53657715 | <b>1,450527</b>   | 6,11985438 | 14,3315873 | 0,000153271 | 0,000994093  | protein_coding |
| ENSMUSG00000019978 | Epb4a.1l2      | erythrocyte protein band 4.1-like 2 [Source:MGI Symbol;Acc:MGI:103009]                                                  |        | 111,4011722  | 0,53622576 | <b>1,45017374</b> | 6,80100624 | 13,6849988 | 0,000216174 | 0,001339599  | protein_coding |
| ENSMUSG00000034640 | Tiparp         | TCDD-inducible poly(ADP-ribose) polymerase [Source:MGI Symbol;Acc:MGI:2159210]                                          |        | 74,49251141  | 0,53596675 | <b>1,44991342</b> | 6,22323314 | 15,9842253 | 6,38725E-05 | 0,000458971  | protein_coding |
| ENSMUSG00000033880 | Lgals3bp       | lectin, galactoside-binding, soluble, 3 binding protein [Source:MGI Symbol;Acc:MGI:99554]                               |        | 444,5586457  | 0,53503303 | <b>1,44897533</b> | 8,79645429 | 8,32600592 | 0,003908149 | 0,016489549  | protein_coding |
| ENSMUSG00000022564 | Grina          | glutamate receptor, ionotropic, N-methyl D-aspartate-associated protein 1 (glutamate binding) [Source:MGI Symbol;Acc:MG |        | 281,3312666  | 0,53421395 | <b>1,44815292</b> | 8,13627768 | 12,5555018 | 0,000395042 | 0,002284379  | protein_coding |
| ENSMUSG00000030533 | Unc45a         | unc-45 homolog A (C. elegans) [Source:MGI Symbol;Acc:MGI:2142246]                                                       |        | 27,6053512   | 0,53252481 | <b>1,44645838</b> | 4,78898505 | 12,6740994 | 0,000370757 | 0,00218101   | protein_coding |
| ENSMUSG0000005514  | Por            | P450 (cytochrome) oxidoreductase [Source:MGI Symbol;Acc:MGI:97744]                                                      |        | 421,1811486  | 0,53107171 | <b>1,44500222</b> | 8,71850048 | 9,73930033 | 0,001803965 | 0,008616404  | protein_coding |
| ENSMUSG00000028080 | Lrba           | LPS-responsive beige-like anchor [Source:MGI Symbol;Acc:MGI:1933162]                                                    |        | 13,12551957  | 0,53099414 | <b>1,44492453</b> | 3,72235055 | 7,1318626  | 0,007572602 | 0,028769081  | protein_coding |
| ENSMUSG00000031214 | Ophn1          | oligophrenin 1 [Source:MGI Symbol;Acc:MGI:2151070]                                                                      |        | 62,87261641  | 0,53069187 | <b>1,44462183</b> | 5,97922108 | 15,2994167 | 9,17448E-05 | 0,000631184  | protein_coding |
| ENSMUSG00000040006 | Gimn1          | glycoprotein integral membrane 1 [Source:MGI Symbol;Acc:MGI:2384905]                                                    |        | 24,13498103  | 0,53061498 | <b>1,44454484</b> | 4,60597354 | 11,4287247 | 0,000723173 | 0,00387964   | protein_coding |
| ENSMUSG00000028842 | Eif2c3         | eukaryotic translation initiation factor 2C, 3 [Source:MGI Symbol;Acc:MGI:2446634]                                      |        | 72,22344808  | 0,52941401 | <b>1,44334282</b> | 6,17721614 | 14,5413302 | 0,000137118 | 0,000899413  | protein_coding |
| ENSMUSG00000040339 | Fam102b        | family with sequence similarity 102, member B [Source:MGI Symbol;Acc:MGI:3036259]                                       |        | 49,3769297   | 0,5290285  | <b>1,4429572</b>  | 5,62438118 | 15,2138491 | 9,59968E-05 | 0,000657145  | protein_coding |
| ENSMUSG00000051341 | Zfp52          | zinc finger protein 52 [Source:MGI Symbol;Acc:MGI:99199]                                                                |        | 17,80769829  | 0,52761733 | <b>1,44154646</b> | 4,15367093 | 10,584807  | 0,001140652 | 0,005738253  | protein_coding |
| ENSMUSG00000030161 | Gabarpap1      | gamma-aminobutyric acid (GABA) A receptor-associated protein-like 1 [Source:MGI Symbol;Acc:MGI:1914980]                 |        | 107,5598065  | 0,52690077 | <b>1,44053065</b> | 6,75139597 | 13,7900524 | 0,000240416 | 0,001276814  | protein_coding |
| ENSMUSG00000019916 | P4ha1          | procollagen-proline, 2-oxoglutarate 4-dioxygenase (proline 4-hydroxylase), alpha 1 polypeptide [Source:MGI Symbol;Acc   |        | 91,10373119  | 0,52656385 | <b>1,4404942</b>  | 6,51612427 | 13,119542  | 0,000293417 | 0,00175396   | protein_coding |
| ENSMUSG00000085795 | Zfp703         | zinc finger protein 703 [Source:MGI Symbol;Acc:MGI:2662729]                                                             |        | 48,08878778  | 0,52615643 | <b>1,44008746</b> | 5,59286256 | 12,6971479 | 0,000366214 | 0,002137933  | protein_coding |
| ENSMUSG00000038866 | Zcchc2         | zinc finger, CCHC domain containing 2 [Source:MGI Symbol;Acc:MGI:2444114]                                               |        | 83,3390137   | 0,52576393 | <b>1,43969572</b> | 6,38241163 | 15,0281835 | 0,000105918 | 0,000716574  | protein_coding |
| ENSMUSG00000039206 | Daglb          | diacylglycerol lipase, beta [Source:MGI Symbol;Acc:MGI:2442032]                                                         |        | 60,17089805  | 0,52540637 | <b>1,43933895</b> | 5,9101013  | 13,872993  | 0,000195589 | 0,001230777  | protein_coding |
| ENSMUSG00000029385 | Ccn2           | cyclin G2 [Source:MGI Symbol;Acc:MGI:1095734]                                                                           |        | 18,52651014  | 0,52409949 | <b>1,4380357</b>  | 4,21301613 | 10,2165119 | 0,001391888 | 0,0006830138 | protein_coding |
| ENSMUSG00000053398 | Phgdh          | 3-phosphoglycerate dehydrogenase [Source:MGI Symbol;Acc:MGI:1355330]                                                    |        | 17,81692683  | 0,52401203 | <b>1,43794852</b> | 4,14107513 | 6,44601304 | 0,011120161 | 0,039655051  | protein_coding |
| ENSMUSG00000066877 | Nck2           | non-catalytic region of tyrosine kinase adaptor protein 2 [Source:MGI Symbol;Acc:MGI:1306821]                           |        | 30,93634012  | 0,52382022 | <b>1,43775736</b> | 4,95585017 | 9,98648181 | 0,001576936 | 0,007635873  | protein_coding |
| ENSMUSG00000054808 | Actna9         | actinin alpha 4 [Source:MGI Symbol;Acc:MGI:1890773]                                                                     |        | 237,9898906  | 0,52289532 | <b>1,43683592</b> | 7,89504308 | 11,2179347 | 0,000810342 | 0,004286579  | protein_coding |
| ENSMUSG00000027132 | 14210042D21Rik | RIKEN cDNA 14210042D21 gene [Source:MGI Symbol;Acc:MGI:1919675]                                                         |        | 25,13742659  | 0,52287014 | <b>1,43681084</b> | 4,65904637 | 9,08276802 | 0,002580292 | 0,01162348   | protein_coding |
| ENSMUSG00000036968 | Cnpy4          | canopy 4 homolog (zebrafish) [Source:MGI Symbol;Acc:MGI:1913705]                                                        |        | 13,78587627  | 0,5226706  | <b>1,43661212</b> | 3,79917238 | 7,66681422 | 0,005624568 | 0,022383206  | protein_coding |
| ENSMUSG00000049295 | Zfp219         | zinc finger protein 219 [Source:MGI Symbol;Acc:MGI:1917140]                                                             |        | 25,62437241  | 0,52252928 | <b>1,43647141</b> | 4,6761583  | 10,7197236 | 0,001059995 | 0,005393734  | protein_coding |
| ENSMUSG00000040221 | Ikbkg          | inhibitor of kappaB kinase gamma [Source:MGI Symbol;Acc:MGI:1338074]                                                    |        | 93,02629182  | 0,52206707 | <b>1,43601127</b> | 6,5411226  | 13,7273456 | 0,000211355 | 0,001314179  | protein_coding |
| ENSMUSG00000032469 | Dbr1           | debranching enzyme homolog 1 (S. cerevisiae) [Source:MGI Symbol;Acc:MGI:1931520]                                        |        | 11,3159699   | 0,51955222 | <b>1,43589696</b> | 3,50103798 | 6,63504667 | 0,00999191  | 0,036426099  | protein_coding |
| ENSMUSG0000004846  | Plod3          | procollagen-lysine, 2-oxoglutarate 5-dioxygenase 3 [Source:MGI Symbol;Acc:MGI:1347008]                                  |        | 80,40071736  | 0,52137983 | <b>1,43532738</b> | 6,33050133 | 13,320566  | 0,000262511 | 0,001590848  | protein_coding |
| ENSMUSG00000022558 | Heatr7a        | HEAT repeat containing 7A [Source:MGI Symbol;Acc:MGI:2442558]                                                           |        | 199,5205303  | 0,52124797 | <b>1,4351962</b>  | 7,64042022 | 11,1941038 | 0,000820577 | 0,004334459  | protein_coding |
| ENSMUSG00000024650 | Cxxc1          | CXXC finger 1 (PHD domain) [Source:MGI Symbol;Acc:MGI:1921572]                                                          |        | 38,32961763  | 0,52070171 | <b>1,43465287</b> | 5,26080475 | 13,5708789 | 0,000229722 | 0,001413188  | protein_coding |
| ENSMUSG00000027187 | Cat            | catalase [Source:MGI Symbol;Acc:MGI:88271]                                                                              |        | 408,8903968  | 0,52047322 | <b>1,43442568</b> | 8,67625983 | 6,63598133 | 0,009993913 | 0,036418945  | protein_coding |
| ENSMUSG00000029821 | Dfna5          | deafness, autosomal dominant 5 (human) [Source:MGI Symbol;Acc:MGI:1889850]                                              |        | 13,39735362  | 0,51961453 | <b>1,43357217</b> | 3,74124999 | 7,48037664 | 0,006237502 | 0,024423178  | protein_coding |
| ENSMUSG00000014353 | Tmem87b        | transmembrane protein 87B [Source:MGI Symbol;Acc:MGI:1919727]                                                           |        | 71,86255538  | 0,51948648 | <b>1,43344493</b> | 6,16851265 | 13,9442723 | 0,000188311 | 0,001191116  | protein_coding |
| ENSMUSG00000034659 | Tmem109        | transmembrane protein 109 [Source:MGI Symbol;Acc:MGI:1915789]                                                           |        | 44,11387919  | 0,51886065 | <b>1,43282325</b> | 5,46684389 | 10,2780066 | 0,001346253 | 0,006638817  | protein_coding |
| ENSMUSG00000044629 | Cnrip1         | cannabinoid receptor interacting protein 1 [Source:MGI Symbol;Acc:MGI:1917505]                                          |        | 9,893825165  | 0,51878173 | <b>1,43274487</b> | 3,31137991 | 6,09702591 | 0,013540959 | 0,046361644  | protein_coding |
| ENSMUSG00000021843 | Ktn1           | kinectin 1 [Source:MGI Symbol;Acc:MGI:109153]                                                                           |        | 35,89910489  | 0,51842787 | <b>1,43239349</b> | 5,17057968 | 10,9871058 | 0,00091748  | 0,00476162   | protein_coding |
| ENSMUSG00000042650 | Alkbh5         | alkB, alkylation repair homolog 5 (E. coli) [Source:MGI Symbol;Acc:MGI:2144489]                                         |        | 96,22160841  | 0,51804856 | <b>1,43201694</b> | 6,58985887 | 15,0483382 | 0,000140792 | 0,000710275  | protein_coding |
| ENSMUSG00000021871 | Pnp            | purine-nucleoside phosphorylase [Source:MGI Symbol;Acc:MGI:97365]                                                       |        | 191,0159933  | 0,51747002 | <b>1,4314428</b>  | 7,57964053 | 14,7215532 | 0,000124614 | 0,000828771  | protein_coding |
| ENSMUSG00000031400 | G6pd           | glucose-6-phosphate dehydrogenase X-linked [Source:MGI Symbol;Acc:MGI:105979]                                           |        | 203,0530671  | 0,51740129 | <b>1,43137461</b> | 7,66837894 | 11,4619909 | 0,000710342 | 0,003814527  | protein_coding |
| ENSMUSG00000040043 | Rbms2          | RNA binding motif, single stranded interacting protein 2 [Source:MGI Symbol;Acc:MGI:1861776]                            |        | 27,66959678  | 0,51684648 | <b>1,43082425</b> | 4,79934167 | 10,9286517 | 0,000946884 | 0,004895724  | protein_coding |
| ENSMUSG00000034216 | Vps18          | vacuolar protein sorting 18 (yeast) [Source:MGI Symbol;Acc:MGI:2443626]                                                 |        | 121,0420067  | 0,5160654  | <b>1,43004982</b> | 6,91913688 | 14,2104479 | 0,00016346  | 0,001050872  | protein_coding |
| ENSMUSG00000024782 | Ak3            | adenylate kinase 3 [Source:MGI Symbol;Acc:MGI:1860835]                                                                  |        | 34,94547296  | 0,51576222 | <b>1,4297493</b>  | 5,1323021  | 11,2584907 | 0,000792631 | 0,00420301   | protein_coding |
| ENSMUSG00000025058 | 5430427019Rik  | RIKEN cDNA 5430427019 gene [Source:MGI Symbol;Acc:MGI:1918648]                                                          |        | 11,25955245  | 0,51526099 | <b>1,42952568</b> | 3,49375767 | 6,08293907 | 0,01364935  | 0,04661654   | protein_coding |
| ENSMUSG00000017715 | Pgs1           | phosphatidylglycerophosphate synthase 1 [Source:MGI Symbol;Acc:MGI:1921701]                                             |        | 94,43762732  | 0,51504072 | <b>1,42903448</b> | 6,56275347 | 15,5504957 | 8,03306E-05 | 0,000562256  | protein_coding |
| ENSMUSG00000046876 | Atxn1          | ataxin 1 [Source:MGI Symbol;Acc:MGI:104783]                                                                             |        | 36,91460163  | 0,51502287 | <b>1,42901679</b> | 5,20409057 | 12,484148  | 0,00041042  | 0,00235798   | protein_coding |
| ENSMUSG00000097119 |                |                                                                                                                         |        | 11,60673942  | 0,51452524 | <b>1,42852396</b> | 3,53220665 | 6,10499472 | 0,013480035 | 0,046196241  | lincRNA        |
| ENSMUSG00000033365 | Ipo13          | importin 13 [Source:MGI Symbol;Acc:MGI:2385205]                                                                         |        | 17,52600074  | 0,51247983 | <b>1,42650008</b> | 6,16338627 | 13,7917142 | 0,000204235 | 0,001276411  | protein_coding |
| ENSMUSG00000020821 | Kif1c          | kinesin family member 1C [Source:MGI Symbol;Acc:MGI:1098260]                                                            |        | 195,41771978 | 0,51241182 | <b>1,42643284</b> | 7,61100085 | 12,9360611 | 0,000323212 | 0,001903896  | protein_coding |
| ENSMUSG00000040225 | Prrc2c         | proline-rich coiled-coil 2C [Source:MGI Symbol;Acc:MGI:1913754]                                                         |        | 250,1683981  | 0,51234624 | <b>1,426368</b>   | 7,9676301  | 11,4220493 | 0,000725776 | 0,003891704  | protein_coding |
| ENSMUSG00000039886 | Tmem120a       | transmembrane protein 120A [Source:MGI Symbol;Acc:MGI:2686991]                                                          |        | 55,46518699  | 0,51176176 | <b>1,42579025</b> | 5,79673914 | 13,2140428 | 0,000277859 | 0,001674625  | protein_coding |
| ENSMUSG00000067787 | Bicap          | bladder cancer associated protein homolog (human) [Source:MGI Symbol;Acc:MGI:1858907]                                   |        | 35,13874724  | 0,51148074 | <b>1,42551255</b> | 5,13861597 | 11,1942284 | 0,000820521 | 0,004334459  | protein_coding |
| ENSMUSG00000020097 | Sgpl1          | sphingosine phosphate lyase 1 [Source:MGI Symbol;Acc:MGI:1261415]                                                       |        | 608,6246577  | 0,51131036 | <b>1,42534421</b> | 9,2496324  | 8,52375307 | 0,003505408 | 0,015094242  | protein_coding |
| ENSMUSG00000026469 | Xpr1           | xenotropic and polytropic retrovirus receptor 1 [Source:MGI Symbol;Acc:MGI:97932]                                       |        | 92,19026352  | 0,51120519 | <b>1,42524031</b> | 6,5280849  | 14,0448313 | 0,000178504 | 0,001133654  | protein_coding |
| ENSMUSG00000028567 | Txndc12        | thioredoxin domain containing 12 (endoplasmic reticulum) [Source:MGI Symbol;Acc:MGI:1913323]                            |        | 26,05114851  | 0,51078426 | <b>1,42482453</b> | 4,71269205 | 10,8454925 | 0,000990365 | 0,00509421   | protein_coding |
| ENSMUSG00000027628 | Aar2           | AAR2 splicing factor homolog (S. cerevisiae) [Source:MGI Symbol;Acc:MGI:1915545]                                        |        | 35,43968394  | 0,51056773 | <b>1,4246107</b>  | 5,15081994 | 12,9745858 | 0,000315748 | 0,001869138  | protein_coding |
| ENSMUSG00000032198 | Dock6          | dedicator of cytokinesis 6 [Source:MGI Symbol;Acc:MGI:1914789]                                                          |        | 16,97341195  | 0,51035085 | <b>1,42439656</b> | 4,089634   | 8,65606396 | 0,003259747 | 0,014172868  | protein_coding |
| ENSMUSG00000015846 | Rxra           | retinoid X receptor alpha [Source:MGI Symbol;Acc:MGI:98214]                                                             |        | 66,19869163  | 0,50972896 | <b>1,42378269</b> | 6,05173012 | 10,432826  | 0,001237952 | 0,006167217  | protein_coding |
| ENSMUSG00000027340 | Slc23a2        | solute carrier family 23 (nucleobase transporters), member 2 [Source:MGI Symbol;Acc:MGI:1859682]                        |        | 182,6224622  | 0,50939159 | <b>1,42344977</b> | 7,51312044 | 12,4954841 | 0,000479945 | 0,002349103  | protein_coding |

|                     |               |                                                                                                                       |             |            |                   |            |            |             |              |                |
|---------------------|---------------|-----------------------------------------------------------------------------------------------------------------------|-------------|------------|-------------------|------------|------------|-------------|--------------|----------------|
| ENSMUSG00000096188  | Cmtm4         | CKLF-like MARVEL transmembrane domain containing 4 [Source:MGI Symbol;Acc:MGI:2142888]sheet1                          | 35,32156127 | 0,5052642  | <b>1,41938327</b> | 5,14821176 | 9,6870794  | 0,001855683 | 0,008804108  | protein_coding |
| ENSMUSG00000097328  | Tnfsf12       | tumor necrosis factor (ligand) superfamily, member 12 [Source:MGI Symbol;Acc:MGI:1196259]                             | 37,41899512 | 0,50519701 | <b>1,41931716</b> | 5,22044437 | 9,19647307 | 0,002424819 | 0,011068336  | protein_coding |
| ENSMUSG00000006611  | Hfe           | hemochromatosis [Source:MGI Symbol;Acc:MGI:109191]                                                                    | 38,95487672 | 0,50451886 | <b>1,41865016</b> | 5,29014756 | 12,1925138 | 0,000479817 | 0,002711804  | protein_coding |
| ENSMUSG00000034361  | Cpne2         | copine II [Source:MGI Symbol;Acc:MGI:2387578]                                                                         | 57,9874591  | 0,50387748 | <b>1,41801961</b> | 5,86063496 | 13,0344433 | 0,000305814 | 0,001815224  | protein_coding |
| ENSMUSG00000025764  | Pfn17         | PHD finger protein 17 [Source:MGI Symbol;Acc:MGI:1925835]                                                             | 12,49133902 | 0,50283486 | <b>1,41699519</b> | 3,64788813 | 6,01109611 | 0,014216194 | 0,048168474  | protein_coding |
| ENSMUSG00000031506  | Ptpn7         | protein tyrosine phosphatase, non-receptor type 7 [Source:MGI Symbol;Acc:MGI:2156893]                                 | 113,7490271 | 0,50250218 | <b>1,41666847</b> | 6,83106604 | 15,3208308 | 9,07107E-05 | 0,000262617  | protein_coding |
| ENSMUSG00000029364  | Wsb2          | WD repeat and SOCS box-containing 2 [Source:MGI Symbol;Acc:MGI:2144041]                                               | 126,2528001 | 0,50240444 | <b>1,4165725</b>  | 6,98021403 | 13,5367924 | 0,000233932 | 0,001435871  | protein_coding |
| ENSMUSG00000037366  | Pafah2        | platelet-activating factor acetylhydrolase 2 [Source:MGI Symbol;Acc:MGI:2140321]                                      | 32,54145408 | 0,50211274 | <b>1,41628611</b> | 5,0310354  | 9,99324933 | 0,001571151 | 0,007811216  | protein_coding |
| ENSMUSG00000006932  | Ctnnb1        | catenin (cadherin associated protein), beta 1 [Source:MGI Symbol;Acc:MGI:88276]                                       | 362,5910405 | 0,50198041 | <b>1,41615621</b> | 8,50177628 | 9,36338422 | 0,002213663 | 0,01022445   | protein_coding |
| ENSMUSG00000005555  | Igta5         | integrin alpha 5 (fibronectin receptor alpha) [Source:MGI Symbol;Acc:MGI:96604]                                       | 226,128083  | 0,50170867 | <b>1,4158895</b>  | 7,82249074 | 11,772125  | 0,000601243 | 0,0003297981 | protein_coding |
| ENSMUSG00000020228  | Helb          | helicase (DNA) B [Source:MGI Symbol;Acc:MGI:2152895]                                                                  | 25,8338932  | 0,50099083 | <b>1,41518517</b> | 4,69911079 | 10,9379231 | 0,000942157 | 0,004878172  | protein_coding |
| ENSMUSG00000025340  | Rabgef1       | RAB guanine nucleotide exchange factor (GEF) 1 [Source:MGI Symbol;Acc:MGI:1929459]                                    | 34,68971292 | 0,50065802 | <b>1,41488874</b> | 5,12337634 | 11,7926803 | 0,000594641 | 0,002652026  | protein_coding |
| ENSMUSG00000079362  | Gbp6          | guanylate binding protein 6 [Source:MGI Symbol;Acc:MGI:2140937]                                                       | 23,21679387 | 0,50061562 | <b>1,41481716</b> | 4,54031756 | 8,51395182 | 0,000352439 | 0,015149417  | protein_coding |
| ENSMUSG00000036880  | Acaa2         | acetyl-Coenzyme A acyltransferase 2 (mitochondrial 3-oxoacyl-Coenzyme A thiolase) [Source:MGI Symbol;Acc:MGI:109      | 18,54501219 | 0,50036545 | <b>1,41457184</b> | 4,21909507 | 8,91539774 | 0,002827762 | 0,012563131  | protein_coding |
| ENSMUSG00000034610  | Zcchc11       | zinc finger, CCHC domain containing 11 [Source:MGI Symbol;Acc:MGI:2445126]                                            | 22,95785848 | 0,49962878 | <b>1,41384971</b> | 4,52164228 | 8,14603507 | 0,004315542 | 0,017905912  | protein_coding |
| ENSMUSG00000058761  | Rnf169        | ring finger protein 169 [Source:MGI Symbol;Acc:MGI:1920257]                                                           | 42,2549384  | 0,49842728 | <b>1,41267273</b> | 5,40287542 | 11,3195623 | 0,000766948 | 0,004090513  | protein_coding |
| ENSMUSG00000028986  | Kih17         | kelch-like 7 (Drosophila) [Source:MGI Symbol;Acc:MGI:1196453]                                                         | 19,1653827  | 0,49800015 | <b>1,41225455</b> | 4,2690627  | 7,18642445 | 0,007345721 | 0,028023392  | protein_coding |
| ENSMUSG00000034377  | Tulp4         | tubby like protein 4 [Source:MGI Symbol;Acc:MGI:1916092]                                                              | 187,6095254 | 0,49797146 | <b>1,41222647</b> | 7,55208618 | 11,3565073 | 0,000751841 | 0,004017741  | protein_coding |
| ENSMUSG00000040479  | Dgkz          | diacylglycerol kinase zeta [Source:MGI Symbol;Acc:MGI:1278339]                                                        | 273,8727883 | 0,49552856 | <b>1,40983718</b> | 8,09696999 | 10,8410488 | 0,000992745 | 0,005101632  | protein_coding |
| ENSMUSG00000063234  | Gpr84         | G protein-coupled receptor 84 [Source:MGI Symbol;Acc:MGI:1934129]                                                     | 28,58994944 | 0,49543807 | <b>1,40974876</b> | 4,86465401 | 8,2507477  | 0,004073522 | 0,01707438   | protein_coding |
| ENSMUSG00000046949  | Nqo2          | NAD(P)H dehydrogenase, quinone 2 [Source:MGI Symbol;Acc:MGI:104513]                                                   | 31,93779286 | 0,49541959 | <b>1,4097307</b>  | 5,00314701 | 8,24390369 | 0,00408891  | 0,017120751  | protein_coding |
| ENSMUSG00000027937  | Jtb           | jumping translocation breakpoint [Source:MGI Symbol;Acc:MGI:1346082]                                                  | 27,01558963 | 0,4944406  | <b>1,4087744</b>  | 4,75995935 | 11,3350826 | 0,000760564 | 0,004062383  | protein_coding |
| ENSMUSG00000030872  | Gga2          | golgi associated, gamma adaptin ear containing, ARF binding protein 2 [Source:MGI Symbol;Acc:MGI:1921355]             | 60,2395573  | 0,49366142 | <b>1,40801374</b> | 5,9126519  | 13,0898794 | 0,000296895 | 0,001771858  | protein_coding |
| ENSMUSG00000031429  | Psmid10       | proteasome (prosome, macropain) 26S subunit, non-ATPase, 10 [Source:MGI Symbol;Acc:MGI:1858898]                       | 38,59660837 | 0,49273693 | <b>1,40711177</b> | 5,2790943  | 11,9767312 | 0,00053869  | 0,002994174  | protein_coding |
| ENSMUSG00000051495  | Irf2bp2       | interferon regulatory factor 2 binding protein 2 [Source:MGI Symbol;Acc:MGI:2443921]                                  | 109,129855  | 0,49265603 | <b>1,40703286</b> | 6,76746263 | 14,6594894 | 0,000128785 | 0,0005852384 | protein_coding |
| ENSMUSG00000041736  | Tspo          | translocator protein [Source:MGI Symbol;Acc:MGI:88222]                                                                | 88,60250886 | 0,49242391 | <b>1,40680651</b> | 6,46797568 | 14,4779802 | 0,000141808 | 0,000927405  | protein_coding |
| ENSMUSG00000020641  | Rsad2         | radical S-adenosyl methionine domain containing 2 [Source:MGI Symbol;Acc:MGI:1929628]                                 | 94,40794985 | 0,49203833 | <b>1,40643056</b> | 6,56801097 | 11,369967  | 0,000746412 | 0,003992614  | protein_coding |
| ENSMUSG00000023456  | Tpi1          | triosephosphate isomerase 1 [Source:MGI Symbol;Acc:MGI:98797]                                                         | 334,7799177 | 0,49112493 | <b>1,4055404</b>  | 8,38767708 | 10,6710386 | 0,00108826  | 0,005512546  | protein_coding |
| ENSMUSG00000020132  | Rab21         | RAB21, member RAS oncogene family [Source:MGI Symbol;Acc:MGI:894308]                                                  | 53,52369783 | 0,49096848 | <b>1,405388</b>   | 5,74565274 | 12,5660882 | 0,00039281  | 0,002275067  | protein_coding |
| ENSMUSG00000003541  | Ier3          | immediate early response 3 [Source:MGI Symbol;Acc:MGI:104814]                                                         | 35,91717314 | 0,49088564 | <b>1,4053073</b>  | 5,18095695 | 12,0667535 | 0,00051329  | 0,002869984  | protein_coding |
| ENSMUSG00000024095  | Hnrpl         | heterogeneous nuclear ribonucleoprotein L-like [Source:MGI Symbol;Acc:MGI:1919942]                                    | 51,39192361 | 0,49001618 | <b>1,40446062</b> | 5,68825568 | 12,0951066 | 0,000505543 | 0,002833879  | protein_coding |
| ENSMUSG00000027342  | Pcna          | proliferating cell nuclear antigen [Source:MGI Symbol;Acc:MGI:97503]                                                  | 201,436742  | 0,48789848 | <b>1,40240056</b> | 7,65497326 | 9,36317257 | 0,000213886 | 0,01022445   | protein_coding |
| ENSMUSG00000034674  | Tdg           | thymine DNA glycosylase [Source:MGI Symbol;Acc:MGI:108247]                                                            | 31,7720308  | 0,48758241 | <b>1,40209335</b> | 4,99240909 | 11,219742  | 0,000893917 | 0,004283223  | protein_coding |
| ENSMUSG00000031431  | Tsc22d3       | TSC22 domain family, member 3 [Source:MGI Symbol;Acc:MGI:1196284]                                                     | 41,80883595 | 0,48579933 | <b>1,40036153</b> | 5,37712362 | 11,9260719 | 0,000553538 | 0,003062295  | protein_coding |
| ENSMUSG00000029145  | Eif2b4        | eukaryotic translation initiation factor 2B, subunit 4 delta [Source:MGI Symbol;Acc:MGI:95300]                        | 14,70156649 | 0,48558977 | <b>1,40015813</b> | 3,89117919 | 7,36790951 | 0,006639808 | 0,025741556  | protein_coding |
| ENSMUSG00000052751  | Repin1        | replication initiator 1 [Source:MGI Symbol;Acc:MGI:1889817]                                                           | 15,85862743 | 0,48476485 | <b>1,39935776</b> | 3,9809104  | 7,77829154 | 0,005287778 | 0,021249751  | protein_coding |
| ENSMUSG00000021911  | Parg          | poly (ADP-ribose) glycohydrolase [Source:MGI Symbol;Acc:MGI:1347094]                                                  | 26,41013497 | 0,48394658 | <b>1,3985643</b>  | 4,72753684 | 10,6795322 | 0,001083275 | 0,005497431  | protein_coding |
| ENSMUSG00000001418  | 0610031J06Rik | RIKEN cDNA 0610031J06 gene [Source:MGI Symbol;Acc:MGI:1913318]                                                        | 187,4202718 | 0,48371716 | <b>1,39834191</b> | 7,55052491 | 10,7000723 | 0,001071313 | 0,000439243  | protein_coding |
| ENSMUSG00000028256  | Odf2l         | outer dense fiber of sperm tails 2-like [Source:MGI Symbol;Acc:MGI:1098600]                                           | 12,39919166 | 0,48323524 | <b>1,39787489</b> | 3,63069124 | 6,18947486 | 0,012851232 | 0,044485344  | protein_coding |
| ENSMUSG00000056666  | RetSAT        | retinol saturase (all trans retinol 13,14 reductase) [Source:MGI Symbol;Acc:MGI:1914692]                              | 24,58506899 | 0,482149   | <b>1,39682279</b> | 4,62601877 | 8,81830581 | 0,002982234 | 0,013148398  | protein_coding |
| ENSMUSG00000021930  | Spry7         | SPRY domain containing 7 [Source:MGI Symbol;Acc:MGI:1913924]                                                          | 27,81129272 | 0,48115192 | <b>1,39585774</b> | 4,79786763 | 8,85295576 | 0,002926147 | 0,002932249  | protein_coding |
| ENSMUSG00000048109  | Rbm15         | RNA binding motif protein 15 [Source:MGI Symbol;Acc:MGI:2443205]                                                      | 21,12249654 | 0,48110376 | <b>1,39581114</b> | 4,38788077 | 8,81570899 | 0,002968481 | 0,013161842  | protein_coding |
| ENSMUSG00000036553  | Sh3tc1        | SH3 domain and tetratricopeptide repeats 1 [Source:MGI Symbol;Acc:MGI:2678949]                                        | 56,58601663 | 0,480787   | <b>1,39550471</b> | 5,81650668 | 12,0221889 | 0,000525709 | 0,002936435  | protein_coding |
| ENSMUSG00000044700  | Tmem201       | transmembrane protein 201 [Source:MGI Symbol;Acc:MGI:1196277]                                                         | 13,68412846 | 0,48077401 | <b>1,39549215</b> | 3,76584224 | 6,67219339 | 0,00979286  | 0,035757444  | protein_coding |
| ENSMUSG00000027641  | Rbl1          | retinoblastoma-like 1 (p107) [Source:MGI Symbol;Acc:MGI:103300]                                                       | 18,85797284 | 0,48007993 | <b>1,39482094</b> | 4,2492581  | 8,02317045 | 0,004618265 | 0,018954383  | protein_coding |
| ENSMUSG00000030615  | Tmem126a      | transmembrane protein 126A [Source:MGI Symbol;Acc:MGI:1913521]                                                        | 22,08449337 | 0,47980863 | <b>1,39455867</b> | 4,4701553  | 8,62030763 | 0,003324357 | 0,014425241  | protein_coding |
| ENSMUSG00000016206  | H2-M3         | histocompatibility 2, M region locus 3 [Source:MGI Symbol;Acc:MGI:95915]                                              | 22,34563346 | 0,47910593 | <b>1,39387958</b> | 4,48501532 | 8,78260437 | 0,003041167 | 0,013376021  | protein_coding |
| ENSMUSG00000020893  | Per1          | period homolog 1 (Drosophila) [Source:MGI Symbol;Acc:MGI:1098283]                                                     | 28,21005882 | 0,47864801 | <b>1,39343723</b> | 4,81937231 | 10,3195121 | 0,001316311 | 0,006502836  | protein_coding |
| ENSMUSG00000005907  | Pex1          | peroxisomal biogenesis factor 1 [Source:MGI Symbol;Acc:MGI:1918632]                                                   | 17,02870028 | 0,47861225 | <b>1,39340269</b> | 4,09486734 | 6,89607544 | 0,008638518 | 0,032118916  | protein_coding |
| ENSMUSG00000035596  | Mboat17       | membrane bound O-acyltransferase domain containing 7 [Source:MGI Symbol;Acc:MGI:1924832]                              | 37,65911249 | 0,47806365 | <b>1,39287293</b> | 5,23738573 | 11,3779629 | 0,000743206 | 0,0039774    | protein_coding |
| ENSMUSG00000030522  | Mtmr10        | myotubularin related protein 10 [Source:MGI Symbol;Acc:MGI:2142292]                                                   | 39,98184367 | 0,4779052  | <b>1,39271997</b> | 5,32262957 | 10,6243251 | 0,00116809  | 0,005640551  | protein_coding |
| ENSMUSG000000031485 | Prosc         | proline synthetase co-transcribed [Source:MGI Symbol;Acc:MGI:1891207]                                                 | 45,64150144 | 0,47757872 | <b>1,39240483</b> | 5,51717302 | 11,3083519 | 0,000771592 | 0,004111292  | protein_coding |
| ENSMUSG00000014498  | Ankrk52       | ankyrin repeat domain 52 [Source:MGI Symbol;Acc:MGI:2444029]                                                          | 103,3517411 | 0,47677106 | <b>1,39162554</b> | 6,69262578 | 13,629791  | 0,000222625 | 0,001374917  | protein_coding |
| ENSMUSG00000026790  | Odf2          | outer dense fiber of sperm tails 2 [Source:MGI Symbol;Acc:MGI:1098824]                                                | 36,96628559 | 0,47675045 | <b>1,39160566</b> | 5,21132883 | 9,96569948 | 0,001594836 | 0,007715747  | protein_coding |
| ENSMUSG00000026721  | Rabgap11      | RAB GTPase activating protein 11-like [Source:MGI Symbol;Acc:MGI:1352507]                                             | 12,87440146 | 0,47616164 | <b>1,39103782</b> | 3,69308939 | 6,18254308 | 0,012901672 | 0,044617774  | protein_coding |
| ENSMUSG000000057101 | Zfp180        | zinc finger protein 180 [Source:MGI Symbol;Acc:MGI:1923701]                                                           | 20,57022088 | 0,47608505 | <b>1,39096397</b> | 4,36547791 | 9,18826978 | 0,00243571  | 0,011085811  | protein_coding |
| ENSMUSG00000022744  | Cldn25        | claudin 25 [Source:MGI Symbol;Acc:MGI:2447860]                                                                        | 25,45813278 | 0,47601318 | <b>1,39089468</b> | 4,68560175 | 9,37040333 | 0,00220517  | 0,010192765  | protein_coding |
| ENSMUSG00000033400  | Agl           | amylol-1,6-glucosidase, 4-alpha-glucanotransferase [Source:MGI Symbol;Acc:MGI:1924809]                                | 62,49100411 | 0,47554206 | <b>1,39044055</b> | 5,96932519 | 10,9183792 | 0,000952149 | 0,00492063   | protein_coding |
| ENSMUSG00000021242  | Npc2          | Niemann Pick type C2 [Source:MGI Symbol;Acc:MGI:1915213]                                                              | 480,766569  | 0,47507539 | <b>1,38999086</b> | 8,90923569 | 8,05453741 | 0,004538983 | 0,01866385   | protein_coding |
| ENSMUSG00000026177  | Slic11a1      | solute carrier family 11 (proton-coupled divalent metal ion transporters), member 1 [Source:MGI Symbol;Acc:MGI:13452] | 583,4701219 | 0,47504164 | <b>1,38995834</b> | 9,18889598 | 7,17849392 | 0,00378262  | 0,028118267  | protein_coding |
| ENSMUSG00000025591  | Tma16         | translation machinery associated 16 homolog (S. cerevisiae) [Source:MGI Symbol;Acc:MGI:1913532]                       | 34,79154843 | 0,47434621 | <b>1,38928849</b> | 5,14271858 | 10,8753772 | 0,000974512 | 0,005024384  | protein_coding |
| ENSMUSG00000035891  | Cerk          | ceramide kinase [Source:MGI Symbol;Acc:MGI:2386052]                                                                   | 131,2273324 | 0,47368262 | <b>1,38864961</b> | 7,03527866 | 11,151466  | 0,000839653 | 0,000403469  | protein_coding |
| ENSMUSG00000040433  | Zbtb38        | zinc finger and BTB domain containing 38 [Source:MGI Symbol;Acc:MGI:2442866]                                          | 27,66871911 | 0,47356036 | <b></b>           |            |            |             |              |                |

|                    |               |                                                                                                          |        |             |            |                   |            |            |             |             |                |
|--------------------|---------------|----------------------------------------------------------------------------------------------------------|--------|-------------|------------|-------------------|------------|------------|-------------|-------------|----------------|
| ENSMUSG00000030284 | Credl1        | cysteine-rich with EGF-like domains 1 [Source:MGI Symbol;Acc:MGI:2152539]                                | Sheet1 | 18,95831707 | 0,469964   | <b>1,38507491</b> | 4,24461322 | 7,28047412 | 0,006970813 | 0,026826034 | protein_coding |
| ENSMUSG00000034714 | Tthy2         | tweety homolog 2 (Drosophila) [Source:MGI Symbol;Acc:MGI:2157091]                                        |        | 55,36600094 | 0,46937393 | <b>1,38450852</b> | 5,7916844  | 8,31246661 | 0,003937388 | 0,016587456 | protein_coding |
| ENSMUSG00000025078 | Nhlrc2        | NHL repeat containing 2 [Source:MGI Symbol;Acc:MGI:1914116]                                              |        | 19,21828805 | 0,4691208  | <b>1,38426562</b> | 4,2663228  | 8,51032904 | 0,003513362 | 0,01517367  | protein_coding |
| ENSMUSG00000020716 | Nf1           | neurofibromatosis 1 [Source:MGI Symbol;Acc:MGI:97306]                                                    |        | 63,3236391  | 0,46903063 | <b>1,38417911</b> | 5,9865476  | 11,6908682 | 0,00628076  | 0,02342465  | protein_coding |
| ENSMUSG00000069520 | Tmem19        | transmembrane protein 19 [Source:MGI Symbol;Acc:MGI:1914476]                                             |        | 35,64235535 | 0,46884573 | <b>1,38400172</b> | 5,15783821 | 9,57596439 | 0,001971413 | 0,009256372 | protein_coding |
| ENSMUSG00000017144 | Rnd3          | Rho family GTPase 3 [Source:MGI Symbol;Acc:MGI:1921444]                                                  |        | 17,62961551 | 0,46874604 | <b>1,38390608</b> | 4,15159827 | 8,10124307 | 0,004423491 | 0,018250431 | protein_coding |
| ENSMUSG00000066440 | Zfyve26       | zinc finger, FYVE domain containing 26 [Source:MGI Symbol;Acc:MGI:1924767]                               |        | 59,67495601 | 0,46863079 | <b>1,38379553</b> | 5,90091005 | 11,4722416 | 0,000706434 | 0,003797257 | protein_coding |
| ENSMUSG00000056429 | Tgolin1       | trans-golgi network protein [Source:MGI Symbol;Acc:MGI:105080]                                           |        | 198,1533307 | 0,46840663 | <b>1,38358022</b> | 7,63155404 | 11,0727593 | 0,000876052 | 0,004581562 | protein_coding |
| ENSMUSG00000034006 | Pq1c1         | PQ loop repeat containing 1 [Source:MGI Symbol;Acc:MGI:1914193]                                          |        | 19,09486809 | 0,46822432 | <b>1,38340572</b> | 4,25572723 | 7,54956286 | 0,006002463 | 0,023637658 | protein_coding |
| ENSMUSG00000022003 | Slc25a30      | solute carrier family 25, member 30 [Source:MGI Symbol;Acc:MGI:1914804]                                  |        | 16,89756974 | 0,46789426 | <b>1,38308925</b> | 4,07689253 | 6,89102561 | 0,008662955 | 0,032198879 | protein_coding |
| ENSMUSG00000048677 | Tpcn2         | two pore segment channel 2 [Source:MGI Symbol;Acc:MGI:2385297]                                           |        | 58,46277307 | 0,46788626 | <b>1,38308158</b> | 5,8715005  | 10,7865815 | 0,001022385 | 0,005234263 | protein_coding |
| ENSMUSG00000032309 | Fbxo22        | F-box protein 22 [Source:MGI Symbol;Acc:MGI:1926014]                                                     |        | 30,6238093  | 0,46773458 | <b>1,38293618</b> | 4,94309918 | 9,49006678 | 0,002065873 | 0,009634018 | protein_coding |
| ENSMUSG00000047648 | Fbxo30        | F-box protein 30 [Source:MGI Symbol;Acc:MGI:1919115]                                                     |        | 25,77800486 | 0,46714407 | <b>1,38237024</b> | 4,70141952 | 8,91615019 | 0,002826597 | 0,012563036 | protein_coding |
| ENSMUSG00000047777 | Phf13         | PHD finger protein 13 [Source:MGI Symbol;Acc:MGI:2446217]                                                |        | 25,43730446 | 0,46625721 | <b>1,38152073</b> | 4,67503711 | 9,31167301 | 0,002276985 | 0,010480616 | protein_coding |
| ENSMUSG0000004567  | Mcoln1        | mucoilin 1 [Source:MGI Symbol;Acc:MGI:1890498]                                                           |        | 60,13984873 | 0,46616164 | <b>1,38142921</b> | 5,91201305 | 9,79729512 | 0,001747687 | 0,008381424 | protein_coding |
| ENSMUSG00000022797 | Tfrc          | transferrin receptor [Source:MGI Symbol;Acc:MGI:98822]                                                   |        | 218,8745826 | 0,46583952 | <b>1,38112081</b> | 7,77552931 | 7,42797989 | 0,006421739 | 0,025019734 | protein_coding |
| ENSMUSG00000035671 | Zswim4        | zinc finger, SWIM domain containing 4 [Source:MGI Symbol;Acc:MGI:2443726]                                |        | 36,35983414 | 0,46467195 | <b>1,38000353</b> | 5,19433389 | 10,7190407 | 0,001060386 | 0,005393734 | protein_coding |
| ENSMUSG00000031007 | Atp6ap2       | ATPase, H+ transporting, lysosomal accessory protein 2 [Source:MGI Symbol;Acc:MGI:1917745]               |        | 248,010176  | 0,46411086 | <b>1,37946691</b> | 7,95533892 | 9,55496633 | 0,001994092 | 0,009342894 | protein_coding |
| ENSMUSG00000002870 | Mcm2          | minichromosome maintenance deficient 2 mitotin (S. cerevisiae) [Source:MGI Symbol;Acc:MGI:105380]        |        | 27,0732427  | 0,46403465 | <b>1,37939405</b> | 4,76884912 | 7,81030931 | 0,005194901 | 0,020930099 | protein_coding |
| ENSMUSG00000037270 | 9430023L20Rik | RIKEN cDNA 9430023L20 gene [Source:MGI Symbol;Acc:MGI:1915368]                                           |        | 19,87469736 | 0,46204202 | <b>1,37749017</b> | 4,31855373 | 7,1526323  | 0,007485404 | 0,028477195 | protein_coding |
| ENSMUSG00000060260 | Pwppw2b       | PWWP domain containing 2B [Source:MGI Symbol;Acc:MGI:2142008]                                            |        | 24,71019452 | 0,4619875  | <b>1,37743811</b> | 4,62511889 | 8,15714846 | 0,004289176 | 0,017830183 | protein_coding |
| ENSMUSG00000026618 | Iars2         | isoleucine-tRNA synthetase 2, mitochondrial [Source:MGI Symbol;Acc:MGI:1919586]                          |        | 70,34488031 | 0,46176861 | <b>1,37722914</b> | 6,13941406 | 10,9980361 | 0,000912085 | 0,004740339 | protein_coding |
| ENSMUSG00000023048 | Prr13         | proline rich 13 [Source:MGI Symbol;Acc:MGI:1913401]                                                      |        | 218,2161738 | 0,46169465 | <b>1,37715853</b> | 7,77025534 | 10,2713575 | 0,001351114 | 0,006659795 | protein_coding |
| ENSMUSG00000032359 | Ctsh          | cathepsin H [Source:MGI Symbol;Acc:MGI:107285]                                                           |        | 156,1002931 | 0,46158168 | <b>1,3770507</b>  | 7,28732298 | 11,5243319 | 0,000686911 | 0,003708825 | protein_coding |
| ENSMUSG00000025289 | Prdx4         | peroxiredoxin 4 [Source:MGI Symbol;Acc:MGI:1859815]                                                      |        | 26,86145082 | 0,46052738 | <b>1,37604474</b> | 4,75769675 | 8,38484088 | 0,003783633 | 0,016081539 | protein_coding |
| ENSMUSG00000025877 | Hk3           | hexokinase 3 [Source:MGI Symbol;Acc:MGI:2670962]                                                         |        | 361,8141952 | 0,46038574 | <b>1,37590965</b> | 8,49939776 | 6,95696663 | 0,008349347 | 0,031202134 | protein_coding |
| ENSMUSG00000029310 | Nudt9         | nudix (nucleoside diphosphate linked moiety X)-type motif 9 [Source:MGI Symbol;Acc:MGI:1921417]          |        | 27,91466259 | 0,46026811 | <b>1,37597947</b> | 4,8084889  | 9,01003436 | 0,000685014 | 0,012007604 | protein_coding |
| ENSMUSG00000032228 | Tcf12         | transcription factor 12 [Source:MGI Symbol;Acc:MGI:101877]                                               |        | 52,32343337 | 0,45936423 | <b>1,37493578</b> | 5,71361678 | 9,05721752 | 0,002616599 | 0,011767732 | protein_coding |
| ENSMUSG00000034430 | Zxdc          | ZXD family zinc finger C [Source:MGI Symbol;Acc:MGI:1933108]                                             |        | 22,80331891 | 0,45858416 | <b>1,37419254</b> | 4,51170105 | 7,81401694 | 0,005184254 | 0,020902485 | protein_coding |
| ENSMUSG00000052837 | Junb          | Jun-B oncogene [Source:MGI Symbol;Acc:MGI:96647]                                                         |        | 127,6149929 | 0,45714809 | <b>1,37282534</b> | 6,99665111 | 10,889466  | 0,000967127 | 0,00498865  | protein_coding |
| ENSMUSG00000027394 | Tti           | tubulin tyrosine ligase [Source:MGI Symbol;Acc:MGI:1916987]                                              |        | 19,15160845 | 0,45693977 | <b>1,37262713</b> | 4,26600221 | 7,15789473 | 0,007463475 | 0,028413442 | protein_coding |
| ENSMUSG00000026307 | Scly          | selenocysteine lyase [Source:MGI Symbol;Acc:MGI:1355310]                                                 |        | 32,50363717 | 0,45656453 | <b>1,37227016</b> | 5,02462606 | 9,53829908 | 0,002012281 | 0,009416071 | protein_coding |
| ENSMUSG00000035371 | Gnptab        | N-acetylglycosamine-1-phosphate transferase, alpha and beta subunits [Source:MGI Symbol;Acc:MGI:3643902] |        | 83,21556838 | 0,45644234 | <b>1,37215394</b> | 6,38164369 | 11,1848227 | 0,000824691 | 0,004348645 | protein_coding |
| ENSMUSG00000054404 | Slnf5         | schlafen 5 [Source:MGI Symbol;Acc:MGI:1329004]                                                           |        | 190,479972  | 0,45608123 | <b>1,37181053</b> | 7,57446655 | 9,37819535 | 0,002195816 | 0,010158077 | protein_coding |
| ENSMUSG00000028367 | Txn1          | thioredoxin 1 [Source:MGI Symbol;Acc:MGI:98874]                                                          |        | 163,8573245 | 0,45563719 | <b>1,37138837</b> | 7,35917102 | 9,90059251 | 0,001652256 | 0,007965482 | protein_coding |
| ENSMUSG00000027303 | Ptptra        | protein tyrosine phosphatase, receptor type, A [Source:MGI Symbol;Acc:MGI:97808]                         |        | 117,9847814 | 0,45550372 | <b>1,3712615</b>  | 6,88295476 | 9,65071469 | 0,001892779 | 0,00892914  | protein_coding |
| ENSMUSG00000041598 | Cdc42ep4      | CDC42 effector protein (Rho GTPase binding) 4 [Source:MGI Symbol;Acc:MGI:1929760]                        |        | 18,45153697 | 0,4552326  | <b>1,37100363</b> | 4,21391828 | 7,52601169 | 0,006081439 | 0,023897272 | protein_coding |
| ENSMUSG00000005949 | Ctns          | cystinosin, nephropathic [Source:MGI Symbol;Acc:MGI:1932872]                                             |        | 27,60605727 | 0,45519014 | <b>1,36963648</b> | 4,79403412 | 9,19215947 | 0,00243054  | 0,010760243 | protein_coding |
| ENSMUSG00000040648 | Ppip5k2       | diphosphoinositol pentakisphosphate kinase 2 [Source:MGI Symbol;Acc:MGI:2142810]                         |        | 45,31667627 | 0,45395583 | <b>1,36979104</b> | 5,50505891 | 9,72475951 | 0,001818021 | 0,008667252 | protein_coding |
| ENSMUSG00000043858 | Nup62         | nucleoporin 62 [Source:MGI Symbol;Acc:MGI:1351500]                                                       |        | 91,58304106 | 0,45337241 | <b>1,36923722</b> | 6,51989901 | 11,9693553 | 0,000540827 | 0,003002557 | protein_coding |
| ENSMUSG00000020451 | Limk2         | LIM motif-containing protein kinase 2 [Source:MGI Symbol;Acc:MGI:1197517]                                |        | 18,99008052 | 0,4530015  | <b>1,36888865</b> | 4,2513407  | 7,93689194 | 0,004843696 | 0,019652025 | protein_coding |
| ENSMUSG00000026821 | Ralgds        | ral guanine nucleotide dissociation stimulator [Source:MGI Symbol;Acc:MGI:107485]                        |        | 95,0118052  | 0,45202894 | <b>1,36796274</b> | 6,57283332 | 11,9917459 | 0,000534367 | 0,002975718 | protein_coding |
| ENSMUSG00000028164 | Manba         | mannosidase, beta A, lysosomal [Source:MGI Symbol;Acc:MGI:88175]                                         |        | 44,16480283 | 0,4502752  | <b>1,36630086</b> | 5,46653961 | 10,8292967 | 0,000999066 | 0,005131714 | protein_coding |
| ENSMUSG00000052144 | Ppp4r2        | protein phosphatase 4, regulatory subunit 2 [Source:MGI Symbol;Acc:MGI:3027896]                          |        | 92,03353661 | 0,45001557 | <b>1,366055</b>   | 6,52764189 | 11,5212477 | 0,000688052 | 0,003711157 | protein_coding |
| ENSMUSG00000028850 | Gpatch3       | G patch domain containing 3 [Source:MGI Symbol;Acc:MGI:2442492]                                          |        | 16,96371749 | 0,44922897 | <b>1,36531039</b> | 4,0782545  | 7,19918408 | 0,007293673 | 0,027884877 | protein_coding |
| ENSMUSG00000018286 | Psmb6         | proteasome (prosome, macropain) subunit, type 6 [Source:MGI Symbol;Acc:MGI:104880]                       |        | 136,7032211 | 0,44897098 | <b>1,36506629</b> | 7,09596087 | 10,8462416 | 0,000989965 | 0,00509421  | protein_coding |
| ENSMUSG00000020232 | Hmg20b        | high mobility group 20B [Source:MGI Symbol;Acc:MGI:1341190]                                              |        | 35,68252503 | 0,44892242 | <b>1,36502031</b> | 5,15589259 | 9,67685516 | 0,001866038 | 0,008840946 | protein_coding |
| ENSMUSG00000078517 | Emnc1         | ER membrane protein complex subunit 1 [Source:MGI Symbol;Acc:MGI:2443696]                                |        | 45,25520983 | 0,44852289 | <b>1,36464234</b> | 5,5020497  | 10,4092027 | 0,001253889 | 0,006234776 | protein_coding |
| ENSMUSG00000027905 | Ddx20         | DEAD (Asp-Glu-Ala-Asp) box polypeptide 20 [Source:MGI Symbol;Acc:MGI:1858415]                            |        | 18,09371065 | 0,44789355 | <b>1,36404718</b> | 4,17934619 | 6,65222213 | 0,009903224 | 0,003611242 | protein_coding |
| ENSMUSG00000038312 | Edem2         | ER degradation enhancer, mannosidase alpha-like 2 [Source:MGI Symbol;Acc:MGI:1915540]                    |        | 64,45646506 | 0,44772704 | <b>1,36388976</b> | 6,00857581 | 11,3174641 | 0,000767815 | 0,004093159 | protein_coding |
| ENSMUSG00000032306 | Mpi           | mannose phosphatase isomerase [Source:MGI Symbol;Acc:MGI:97075]                                          |        | 17,16326102 | 0,44687898 | <b>1,36300229</b> | 4,11136602 | 6,3969975  | 0,011431353 | 0,040549959 | protein_coding |
| ENSMUSG00000034807 | Glt25d1       | glycosyltransferase 25 domain containing 1 [Source:MGI Symbol;Acc:MGI:1924348]                           |        | 124,9597101 | 0,44660729 | <b>1,36283159</b> | 6,96617984 | 11,641453  | 0,000644982 | 0,003508127 | protein_coding |
| ENSMUSG00000032712 | 2810474019Rik | RIKEN cDNA 2810474019 gene [Source:MGI Symbol;Acc:MGI:1914496]                                           |        | 119,6700518 | 0,44614298 | <b>1,36239305</b> | 6,90308189 | 11,5795318 | 0,000666817 | 0,003614367 | protein_coding |
| ENSMUSG00000025287 | Acot9         | acyl-CoA thioesterase 9 [Source:MGI Symbol;Acc:MGI:1928939]                                              |        | 42,91369261 | 0,44583229 | <b>1,36167489</b> | 5,42973524 | 9,30846365 | 0,002280977 | 0,010490202 | protein_coding |
| ENSMUSG00000049339 | Fam134a       | family with sequence similarity 134, member A [Source:MGI Symbol;Acc:MGI:2388278]                        |        | 78,4165541  | 0,44490143 | <b>1,36122111</b> | 6,29399649 | 11,5201024 | 0,000688476 | 0,003711622 | protein_coding |
| ENSMUSG00000028136 | Snx27         | sorting nexin family member 27 [Source:MGI Symbol;Acc:MGI:1923992]                                       |        | 83,47656367 | 0,4446339  | <b>1,36096871</b> | 6,38770526 | 10,5518751 | 0,001160703 | 0,005828447 | protein_coding |
| ENSMUSG00000030138 | Bms1          | BMS1 homolog, ribosome assembly protein (yeast) [Source:MGI Symbol;Acc:MGI:2446132]                      |        | 65,06730738 | 0,4442773  | <b>1,36063235</b> | 6,02549056 | 11,1425737 | 0,000843688 | 0,004422517 | protein_coding |
| ENSMUSG00000038388 | Mpp6          | membrane protein, palmitoylated 6 (MAGUK p55 subfamily member 6) [Source:MGI Symbol;Acc:MGI:1927340]     |        | 45,73447279 | 0,44420357 | <b>1,36056282</b> | 5,5200708  | 9,9397814  | 0,001617448 | 0,007818256 | protein_coding |
| ENSMUSG00000038534 | Ospb17        | oxysterol binding protein-like 7 [Source:MGI Symbol;Acc:MGI:1918490]                                     |        | 16,04486116 | 0,44405843 | <b>1,36042595</b> | 3,98937166 | 6,53458222 | 0,010579707 | 0,038086252 | protein_coding |
| ENSMUSG00000032459 | Mrsps22       | mitochondrial ribosomal protein S22 [Source:MGI Symbol;Acc:MGI:1928137]                                  |        | 15,46640551 | 0,4433875  | <b>1,35979342</b> | 3,95849241 | 6,04441831 | 0,013950328 | 0,047423347 | protein_coding |
| ENSMUSG00000048661 | Lemd3         | LEM domain containing 3 [Source:MGI Symbol;Acc:MGI:3580376]                                              |        | 15,92783254 | 0,44290425 | <b>1,35933802</b> | 3,99952021 | 6,20204288 | 0,012760295 | 0,044254218 | protein_coding |
| ENSMUSG00000027613 | Eif6          | eukaryotic translation initiation factor 6 [Source:M                                                     |        |             |            |                   |            |            |             |             |                |

|                    |               |                                                                                                                             |        |             |            |                        |             |            |             |             |                |
|--------------------|---------------|-----------------------------------------------------------------------------------------------------------------------------|--------|-------------|------------|------------------------|-------------|------------|-------------|-------------|----------------|
| ENSMUSG00000030287 | Itpr2         | inositol 1,4,5-triphosphate receptor 2 [Source:MGI Symbol;Acc:MGI:99418]                                                    | Sheet1 | 40,6822114  | 0.43905638 | <b>1,35571731</b>      | 5,34733525  | 9,16754735 | 0,002463445 | 0,011188867 | protein_coding |
| ENSMUSG00000028672 | Hmgcl         | 3-hydroxy-3-methylglutaryl-Coenzyme A lyase [Source:MGI Symbol;Acc:MGI:96158]                                               |        | 40,4349126  | 0.43857794 | <b>1,35526778</b>      | 5,3376187   | 8,36804329 | 0,003818766 | 0,016180786 | protein_coding |
| ENSMUSG00000058013 | Sept11        | septin 11 [Source:MGI Symbol;Acc:MGI:1277214]                                                                               |        | 45,38436098 | 0.43822981 | <b>1,35494079</b>      | 5,51013048  | 9,41033575 | 0,002157657 | 0,010015285 | protein_coding |
| ENSMUSG00000022180 | Slc7a8        | solute carrier family 7 (cationic amino acid transporter, y+ system), member 8 [Source:MGI Symbol;Acc:MGI:1355323]          |        | 95,24610962 | 0.43781471 | <b>1,354551</b>        | 6,57697459  | 10,0464386 | 0,001526428 | 0,007424019 | protein_coding |
| ENSMUSG00000018965 | Ywhah         | tyrosine 3-monooxygenase/tryptophan 5-monooxygenase activation protein, eta polypeptide [Source:MGI Symbol;Acc:MGI:1355323] |        | 338,2301316 | 0.43757861 | <b>1,35432934</b>      | 8,4024009   | 7,78303217 | 0,00527392  | 0,021209577 | protein_coding |
| ENSMUSG00000006527 | Sfmbt1        | Scm-like with four mbt domains 1 [Source:MGI Symbol;Acc:MGI:1859609]                                                        |        | 81,72985245 | 0.43737419 | <b>1,35413746</b>      | 6,35575829  | 10,4448899 | 0,001229892 | 0,00613383  | protein_coding |
| ENSMUSG00000028854 | Slc9a1        | solute carrier family 9 (sodium/hydrogen exchanger), member 1 [Source:MGI Symbol;Acc:MGI:102462]                            |        | 46,25725096 | 0.43733468 | <b>1,35410037</b>      | 5,53078031  | 9,14685056 | 0,002491465 | 0,011302118 | protein_coding |
| ENSMUSG00000040964 | Arhgef10l     | Rho guanine nucleotide exchange factor (GEF) 10-like [Source:MGI Symbol;Acc:MGI:1920004]                                    |        | 55,78181469 | 0.43667954 | <b>1,3534856</b>       | 5,79797927  | 10,5296108 | 0,001174769 | 0,005888318 | protein_coding |
| ENSMUSG00000038563 | Eftud1        | elongation factor Tu GTP binding domain containing 1 [Source:MGI Symbol;Acc:MGI:2141969]                                    |        | 18,21505189 | 0.4362391  | <b>1,35307246</b>      | 4,19353678  | 6,87987564 | 0,000871763 | 0,032389404 | protein_coding |
| ENSMUSG00000038564 | Ift172        | intraflagellar transport 172 [Source:MGI Symbol;Acc:MGI:2682064]                                                            |        | 17,28091134 | 0.4359935  | <b>1,35284214</b>      | 4,1049271   | 6,47187451 | 0,010959488 | 0,039132886 | protein_coding |
| ENSMUSG00000021171 | Esy2          | extended synaptotagmin-like protein 2 [Source:MGI Symbol;Acc:MGI:1261845]                                                   |        | 45,39927208 | 0.43543562 | <b>1,3523191</b>       | 5,508386    | 9,03305522 | 0,00265141  | 0,011880522 | protein_coding |
| ENSMUSG00000052962 | Mrp135        | mitochondrial ribosomal protein L35 [Source:MGI Symbol;Acc:MGI:1913473]                                                     |        | 25,90314954 | 0.43505454 | <b>1,35196194</b>      | 4,70377915  | 8,35996462 | 0,00383578  | 0,016221601 | protein_coding |
| ENSMUSG00000017615 | Tnfalp1       | tumor necrosis factor, alpha-induced protein 1 (endothelial) [Source:MGI Symbol;Acc:MGI:104961]                             |        | 61,02964955 | 0.43497889 | <b>1,35189105</b>      | 5,9382766   | 9,93282512 | 0,001623572 | 0,007844407 | protein_coding |
| ENSMUSG00000003444 | Med29         | mediator complex subunit 29 [Source:MGI Symbol;Acc:MGI:1914474]                                                             |        | 18,74295128 | 0.43464996 | <b>1,35158286</b>      | 4,23565017  | 6,99345106 | 0,008180847 | 0,030697734 | protein_coding |
| ENSMUSG00000035765 | Dym           | dymeclin [Source:MGI Symbol;Acc:MGI:1918480]                                                                                |        | 26,84739998 | 0.43375678 | <b>1,35074634</b>      | 4,7527117   | 6,90247906 | 0,008607631 | 0,032036599 | protein_coding |
| ENSMUSG00000033020 | Poir2f        | polymerase (RNA) II (DNA directed) polypeptide F [Source:MGI Symbol;Acc:MGI:1349393]                                        |        | 21,06939126 | 0.43327059 | <b>1,35029122</b>      | 4,39662104  | 7,5861997  | 0,005881681 | 0,023245333 | protein_coding |
| ENSMUSG00000054008 | Ndst1         | N-deacetylase/N-sulfotransferase (heparan glucosaminyl) 1 [Source:MGI Symbol;Acc:MGI:104719]                                |        | 29,60418407 | 0.43317788 | <b>1,35020531</b>      | 4,88494134  | 6,97330561 | 0,008273452 | 0,030992301 | protein_coding |
| ENSMUSG00000006818 | Sod2          | superoxide dismutase 2, mitochondrial [Source:MGI Symbol;Acc:MGI:98352]                                                     |        | 278,956336  | 0.432729   | <b>1,34978442</b>      | 8,12579297  | 8,72823592 | 0,003133195 | 0,013714906 | protein_coding |
| ENSMUSG00000053870 | Fpgt          | fucose-1-phosphate guanylyltransferase [Source:MGI Symbol;Acc:MGI:1922790]                                                  |        | 22,64326564 | 0.43267487 | <b>1,34973377</b>      | 4,49873751  | 7,55467767 | 0,00598545  | 0,023604502 | protein_coding |
| ENSMUSG00000044763 | Trmt10c       | tRNA methyltransferase 10 homolog C (S. cerevisiae) [Source:MGI Symbol;Acc:MGI:1196261]                                     |        | 22,82052623 | 0.43178733 | <b>1,34890368</b>      | 4,51356415  | 7,05316008 | 0,007912554 | 0,029884919 | protein_coding |
| ENSMUSG00000027286 | Lrrc57        | leucine rich repeat containing 57 [Source:MGI Symbol;Acc:MGI:1913856]                                                       |        | 16,70525483 | 0.4317038  | <b>1,34882558</b>      | 4,0659901   | 6,53635472 | 0,01056917  | 0,038060791 | protein_coding |
| ENSMUSG00000035725 | Prx           | protein kinase, X-linked [Source:MGI Symbol;Acc:MGI:1309999]                                                                |        | 56,80565914 | 0.4309253  | <b>1,34809793</b>      | 5,83480593  | 9,36104473 | 0,002126458 | 0,010231568 | protein_coding |
| ENSMUSG00000030779 | Rbbp6         | retinoblastoma binding protein 6 [Source:MGI Symbol;Acc:MGI:894835]                                                         |        | 91,05655379 | 0.4293318  | <b>1,34660974</b>      | 6,50860306  | 11,102705  | 0,000862019 | 0,0045143   | protein_coding |
| ENSMUSG00000024236 | Svil          | supervillin [Source:MGI Symbol;Acc:MGI:2147319]                                                                             |        | 43,56533854 | 0.42849042 | <b>1,34624494</b>      | 5,44230922  | 9,33746381 | 0,00224516  | 0,010342799 | protein_coding |
| ENSMUSG00000058235 | Metap1        | methionyl aminopeptidase 1 [Source:MGI Symbol;Acc:MGI:1922874]                                                              |        | 57,89117714 | 0.42831234 | <b>1,34565851</b>      | 5,85990949  | 9,13558282 | 0,002506856 | 0,01134417  | protein_coding |
| ENSMUSG00000003847 | Dock1         | dedicator of cytokinesis 1 [Source:MGI Symbol;Acc:MGI:2429765]                                                              |        | 21,20460828 | 0.42825448 | <b>1,34560455</b>      | 4,41225044  | 6,25066416 | 0,012414675 | 0,043246681 | protein_coding |
| ENSMUSG00000003847 | Nfat5         | nuclear factor of activated T cells 5 [Source:MGI Symbol;Acc:MGI:1859333]                                                   |        | 137,2700064 | 0.4281094  | <b>1,34546923</b>      | 7,10169255  | 10,8454773 | 0,000990373 | 0,00509421  | protein_coding |
| ENSMUSG00000024308 | Tabpp         | TAP binding protein [Source:MGI Symbol;Acc:MGI:1201689]                                                                     |        | 229,7115947 | 0.42729148 | <b>1,34470665</b>      | 7,84345925  | 8,5192994  | 0,003513997 | 0,015116793 | protein_coding |
| ENSMUSG00000028792 | Ak2           | adenylyl kinase 2 [Source:MGI Symbol;Acc:MGI:87978]                                                                         |        | 51,41408906 | 0.4265545  | <b>1,34411395</b>      | 5,68615092  | 9,65118984 | 0,00189229  | 0,00892914  | protein_coding |
| ENSMUSG00000026718 | Stam          | signal transducing adaptor molecule (SH3 domain and ITAM motif) 1 [Source:MGI Symbol;Acc:MGI:1329014]                       |        | 42,42100892 | 0.42633726 | <b>1,3428864</b>       | 5,41250336  | 9,14905984 | 0,002488459 | 0,011293143 | protein_coding |
| ENSMUSG00000024451 | Arap3         | ArfGAP with RhoGAP domain, ankyrin repeat and PH domain 3 [Source:MGI Symbol;Acc:MGI:2147274]                               |        | 36,73607612 | 0.42352611 | <b>1,3412016</b>       | 5,20044544  | 6,25963226 | 0,012351984 | 0,043103852 | protein_coding |
| ENSMUSG00000043263 | Pyh1n1        | pyrin and HIN domain family, member 1 [Source:MGI Symbol;Acc:MGI:2138243]                                                   |        | 52,79146985 | 0.42311178 | <b>1,34081648</b>      | 5,72392905  | 9,12420191 | 0,002522499 | 0,011391162 | protein_coding |
| ENSMUSG00000031226 | 2610029G23Rik | RIKEN cDNA 2610029G23 gene [Source:MGI Symbol;Acc:MGI:1914933]                                                              |        | 31,84845052 | 0.42199295 | <b>1,33977705</b>      | 5,00089539  | 6,37368431 | 0,011582488 | 0,041037341 | protein_coding |
| ENSMUSG00000035021 | Baz1a         | bromodomain adjacent to zinc finger domain 1A [Source:MGI Symbol;Acc:MGI:1309478]                                           |        | 55,07658634 | 0.42191249 | <b>1,33970234</b>      | 5,78991235  | 9,42081354 | 0,002145363 | 0,009962428 | protein_coding |
| ENSMUSG00000041827 | Oas1l         | 2'-5' oligoadenylate synthetase-like 1 [Source:MGI Symbol;Acc:MGI:2180849]                                                  |        | 23,52197687 | 0.42189464 | <b>1,33968576</b>      | 4,56110905  | 6,78637381 | 0,009185631 | 0,033843906 | protein_coding |
| ENSMUSG00000032475 | Nck1          | non-catalytic region of tyrosine kinase adaptor protein 1 [Source:MGI Symbol;Acc:MGI:109601]                                |        | 17,5816465  | 0.42186505 | <b>1,33955829</b>      | 4,79367465  | 6,79844025 | 0,009123754 | 0,033672385 | protein_coding |
| ENSMUSG00000049624 | Slc17a5       | solute carrier family 17 (anion/sugar transporter), member 5 [Source:MGI Symbol;Acc:MGI:1924105]                            |        | 40,66667541 | 0.42163785 | <b>1,33944733</b>      | 5,34725725  | 8,24977442 | 0,004057507 | 0,01707438  | protein_coding |
| ENSMUSG00000037536 | Fbxo34        | F-box protein 34 [Source:MGI Symbol;Acc:MGI:1926188]                                                                        |        | 26,06390109 | 0.42067562 | <b>1,33855426</b>      | 4,70464422  | 7,87850719 | 0,005002576 | 0,020227821 | protein_coding |
| ENSMUSG00000041747 | Utp15         | UTP15, U3 small nucleolar ribonucleoprotein, homolog (yeast) [Source:MGI Symbol;Acc:MGI:2145443]                            |        | 32,90529581 | 0.42020643 | <b>1,33811901</b>      | 5,04981871  | 8,21538136 | 0,004153678 | 0,017345673 | protein_coding |
| ENSMUSG00000021583 | Erap1         | endoplasmic reticulum aminopeptidase 1 [Source:MGI Symbol;Acc:MGI:1933403]                                                  |        | 71,84591943 | 0.41881109 | <b>1,33682544</b>      | 6,16902309  | 8,77029447 | 0,00306176  | 0,013455823 | protein_coding |
| ENSMUSG00000000287 | Naa20         | N(alpha)-acetyltransferase 20, NatB catalytic subunit [Source:MGI Symbol;Acc:MGI:1915127]                                   |        | 43,85275285 | 0.41847089 | <b>1,33651024</b>      | 5,45958253  | 8,70875081 | 0,003166861 | 0,013807264 | protein_coding |
| ENSMUSG00000030726 | Pold3         | polymerase (DNA-directed), delta 3, accessory subunit [Source:MGI Symbol;Acc:MGI:1915217]                                   |        | 34,00614626 | 0.41722403 | <b>1,33572594</b>      | 5,0955322   | 8,71808405 | 0,00315069  | 0,013769542 | protein_coding |
| ENSMUSG00000022521 | Crbp3         | CREB binding protein [Source:MGI Symbol;Acc:MGI:1098280]                                                                    |        | 49,21620516 | 0.41755981 | <b>1,33566649</b>      | 5,62169703  | 9,47816858 | 0,002079314 | 0,009688476 | protein_coding |
| ENSMUSG00000009563 | Tor2a         | torsin family 2, member A [Source:MGI Symbol;Acc:MGI:1353596]                                                               |        | 25,89478587 | 0.41650943 | <b>1,33469438</b>      | 4,688976978 | 7,35090661 | 0,006702895 | 0,025949508 | protein_coding |
| ENSMUSG00000027439 | Gzfl          | GDNF-inducible zinc finger protein 1 [Source:MGI Symbol;Acc:MGI:1921783]                                                    |        | 43,58226556 | 0.41619859 | <b>1,33440684</b>      | 5,45275928  | 8,57882344 | 0,003400951 | 0,014693765 | protein_coding |
| ENSMUSG00000023008 | Fmnl3         | formin-like 3 [Source:MGI Symbol;Acc:MGI:109569]                                                                            |        | 50,84131131 | 0.41605063 | <b>1,33427</b>         | 5,66649184  | 8,22563126 | 0,004130284 | 0,01724239  | protein_coding |
| ENSMUSG00000060733 | Ipmk          | inositol polyphosphate multikinase [Source:MGI Symbol;Acc:MGI:1916968]                                                      |        | 26,99774549 | 0.41596359 | <b>1,3341895</b>       | 4,75770407  | 8,12660207 | 0,004362042 | 0,018037545 | protein_coding |
| ENSMUSG00000059920 | 4930453N24Rik | RIKEN cDNA 4930453N24 gene [Source:MGI Symbol;Acc:MGI:1914859]                                                              |        | 17,93635983 | 0.41541121 | <b>1,33367876</b>      | 4,17744902  | 5,9430474  | 0,014772433 | 0,049649654 | protein_coding |
| ENSMUSG00000028684 | Urod          | uroporphyrinogen decarboxylase [Source:MGI Symbol;Acc:MGI:98916]                                                            |        | 21,04180384 | 0.41479174 | <b>1,33310622</b>      | 4,40144275  | 6,63666163 | 0,009990097 | 0,036417118 | protein_coding |
| ENSMUSG00000040721 | Zfxh2         | zinc finger homeobox 2 [Source:MGI Symbol;Acc:MGI:2686934]                                                                  |        | 22,36790885 | 0.4145404  | <b>1,33287399</b>      | 4,48800865  | 6,26460226 | 0,012317382 | 0,04305793  | protein_coding |
| ENSMUSG00000029056 | Pank4         | pantothenate kinase 4 [Source:MGI Symbol;Acc:MGI:2387466]                                                                   |        | 24,48987303 | 0.41367486 | <b>1,33270458</b>      | 4,60778694  | 7,33353695 | 0,006767974 | 0,026173789 | protein_coding |
| ENSMUSG00000030225 | Dera          | 2-deoxyribose-5-phosphate aldolase homolog (C. elegans) [Source:MGI Symbol;Acc:MGI:1913762]                                 |        | 46,62313114 | 0.41365843 | <b>1,33205941</b>      | 5,54647554  | 8,93968167 | 0,002790413 | 0,012422315 | protein_coding |
| ENSMUSG00000037857 | Nufip2        | nuclear fragile X mental retardation protein interacting protein 2 [Source:MGI Symbol;Acc:MGI:1915814]                      |        | 95,19782752 | 0.41368772 | <b>1,33188427</b>      | 6,57301022  | 10,3884695 | 0,001268047 | 0,006295541 | protein_coding |
| ENSMUSG00000035614 | Fam179b       | family with sequence similarity 179, member B [Source:MGI Symbol;Acc:MGI:2684313]                                           |        | 30,85851848 | 0.412833   | <b>1,3312975</b>       | 4,95042501  | 6,97083845 | 0,008284867 | 0,031024483 | protein_coding |
| ENSMUSG00000026064 | Ptp4a1        | protein tyrosine phosphatase 4a1 [Source:MGI Symbol;Acc:MGI:1277096]                                                        |        | 114,0216894 | 0.41280909 | <b>1,33127544</b>      | 6,83514339  | 8,38638967 | 0,003780411 | 0,016080283 | protein_coding |
| ENSMUSG00000055371 | Stam2         | signal transducing adaptor molecule (SH3 domain and ITAM motif) 2 [Source:MGI Symbol;Acc:MGI:1929100]                       |        | 68,60285806 | 0.41225063 | <b>1,3307602</b>       | 6,1032611   | 9,73196794 | 0,001810905 | 0,008646855 | protein_coding |
| ENSMUSG00000024130 | Abca3         | ATP-binding cassette, sub-family A (ABC1), member 3 [Source:MGI Symbol;Acc:MGI:1351617]                                     |        | 82,8727688  | 0.41188826 | <b>1,33042599</b>      | 6,37304826  | 9,928675   | 0,001627236 | 0,007858657 | protein_coding |
| ENSMUSG00000045917 | 6330416G13Rik | RIKEN cDNA 6330416G13 gene [Source:MGI Symbol;Acc:MGI:1913920]                                                              |        | 63,87333685 | 0.41147929 | <b>1,3300489</b>       | 5,99692783  | 9,0098834  | 0,002685235 | 0,012007604 | protein_coding |
| ENSMUSG00000031875 | Cmtm3         | CKLF-like MARVEL transmembrane domain containing 3 [Source:MGI Symbol;Acc:MGI:2447162]                                      |        | 95,53291563 | 0.41113958 | <b>1,32973575</b>      | 6,57936822  | 9,85070067 | 0,001697761 | 0,008170088 | protein_coding |
| ENSMUSG00000075706 | Gpx4          | glutathione peroxidase 4 [Source:MGI Symbol;Acc:MGI:104767]                                                                 |        | 124,3949442 | 0.41084777 | <b>1,32946682</b>      | 6,95841156  | 8,58440945 | 0,003390533 | 0,014668059 | protein_coding |
| ENSMUSG00000046718 | Bst2          | bone marrow stromal cell antigen 2 [Source:MGI Symbol;Acc:MGI:1916800]                                                      |        | 319,7991487 | 0.41083804 | <b>1,32945785&lt;/</b> |             |            |             |             |                |

|                     |          |                                                                                                                                  |        |             |            |                   |            |            |             |             |                |
|---------------------|----------|----------------------------------------------------------------------------------------------------------------------------------|--------|-------------|------------|-------------------|------------|------------|-------------|-------------|----------------|
| ENSMUSG00000023027  | Atf1     | activating transcription factor 1 [Source:MGI Symbol;Acc:MGI:1298366]                                                            | Sheet1 | 40,18965852 | 0,40746387 | <b>1,32635215</b> | 5,33189418 | 8,36504591 | 0,00382507  | 0,016195006 | protein_coding |
| ENSMUSG00000033487  | Fndc3a   | fibronectin type III domain containing 3A [Source:MGI Symbol;Acc:MGI:1196463]                                                    |        | 145,1532027 | 0,40735726 | <b>1,32625414</b> | 7,18203703 | 8,96461433 | 0,002752588 | 0,012268837 | protein_coding |
| ENSMUSG00000056234  | Ncoa4    | nuclear receptor coactivator 4 [Source:MGI Symbol;Acc:MGI:1350932]                                                               |        | 199,2032805 | 0,4070393  | <b>1,32596188</b> | 7,63826775 | 8,52473183 | 0,003503524 | 0,015094242 | protein_coding |
| ENSMUSG00000030983  | Bcipc    | BRCA2 and CDKN1A interacting protein [Source:MGI Symbol;Acc:MGI:1913415]                                                         |        | 34,83774026 | 0,40699294 | <b>1,32591927</b> | 5,12293664 | 8,07510757 | 0,004487744 | 0,018480827 | protein_coding |
| ENSMUSG00000037553  | Zdhhc18  | zinc finger, DHHC domain containing 18 [Source:MGI Symbol;Acc:MGI:3527792]                                                       |        | 42,68612562 | 0,40683507 | <b>1,32577419</b> | 5,41807003 | 8,30095193 | 0,00396243  | 0,016673773 | protein_coding |
| ENSMUSG00000024942  | Capn1    | calpain 1 [Source:MGI Symbol;Acc:MGI:88263]                                                                                      |        | 61,67011335 | 0,40577334 | <b>1,32479886</b> | 5,94527627 | 8,70913005 | 0,003166203 | 0,013807264 | protein_coding |
| ENSMUSG00000024480  | Ap3s1    | adaptor-related protein complex 3, sigma 1 subunit [Source:MGI Symbol;Acc:MGI:1337062]                                           |        | 112,121118  | 0,40572589 | <b>1,32475529</b> | 6,81185383 | 9,2545706  | 0,002349084 | 0,010753911 | protein_coding |
| ENSMUSG00000032244  | Fem1b    | feminization 1 homolog b (C. elegans) [Source:MGI Symbol;Acc:MGI:1335087]                                                        |        | 95,46874768 | 0,40559506 | <b>1,32463516</b> | 6,57904217 | 8,38025641 | 0,003793189 | 0,01611592  | protein_coding |
| ENSMUSG00000041168  | Lonp1    | lon peptidase 1, mitochondrial [Source:MGI Symbol;Acc:MGI:1921392]                                                               |        | 66,1728158  | 0,40523575 | <b>1,3243053</b>  | 6,02745016 | 9,3107571  | 0,002278123 | 0,010484166 | protein_coding |
| ENSMUSG00000097815  |          |                                                                                                                                  |        | 97,74772994 | 0,40513679 | <b>1,32421446</b> | 6,61895555 | 9,49401759 | 0,002061429 | 0,009617377 | lincRNA        |
| ENSMUSG00000040455  | Usp45    | ubiquitin specific peptidase 45 [Source:MGI Symbol;Acc:MGI:101850]                                                               |        | 31,2621023  | 0,40508298 | <b>1,32416507</b> | 4,97191985 | 6,57048822 | 0,01036835  | 0,03748505  | protein_coding |
| ENSMUSG00000027447  | Cst3     | cystatin C [Source:MGI Symbol;Acc:MGI:102519]                                                                                    |        | 313,4532475 | 0,40495841 | <b>1,32404744</b> | 8,29190449 | 7,1537311  | 0,00748082  | 0,028469612 | protein_coding |
| ENSMUSG00000029468  | P2rx7    | purinergic receptor P2X, ligand-gated ion channel, 7 [Source:MGI Symbol;Acc:MGI:1339957]                                         |        | 47,11345535 | 0,40386835 | <b>1,3230507</b>  | 5,55728093 | 8,76142688 | 0,003076682 | 0,013510596 | protein_coding |
| ENSMUSG00000041354  | Rgl2     | ral guanine nucleotide dissociation stimulator-like 2 [Source:MGI Symbol;Acc:MGI:107483]                                         |        | 102,9019476 | 0,40355772 | <b>1,32276586</b> | 6,68264569 | 10,2252084 | 0,001385341 | 0,006804086 | protein_coding |
| ENSMUSG00000024885  | Aldh3b1  | aldehyde dehydrogenase 3 family, member B1 [Source:MGI Symbol;Acc:MGI:1914939]                                                   |        | 55,25760258 | 0,40350646 | <b>1,32271887</b> | 5,79144889 | 8,65418141 | 0,003263116 | 0,014181907 | protein_coding |
| ENSMUSG00000079437  | Tmem179b | transmembrane protein 179B [Source:MGI Symbol;Acc:MGI:1914956]                                                                   |        | 29,07801423 | 0,40291083 | <b>1,32217288</b> | 4,8594962  | 7,39740749 | 0,006531795 | 0,025385506 | protein_coding |
| ENSMUSG00000096401  |          | Uncharacterized protein [Source:UniProtKB/TrEMBL;Acc:J3QN48]                                                                     |        | 33,47376949 | 0,40286608 | <b>1,32213187</b> | 5,06605055 | 7,36855233 | 0,006637435 | 0,025741438 | protein_coding |
| ENSMUSG00000037217  | Syn1     | synapsin I [Source:MGI Symbol;Acc:MGI:98460]                                                                                     |        | 50,25298378 | 0,40259407 | <b>1,32188262</b> | 5,65553056 | 8,80645137 | 0,003001673 | 0,013223488 | protein_coding |
| ENSMUSG00000036779  | Papd5    | PAP associated domain containing 5 [Source:MGI Symbol;Acc:MGI:1917820]                                                           |        | 45,77167383 | 0,40242615 | <b>1,32172877</b> | 5,52099322 | 8,73299054 | 0,003125035 | 0,013690097 | protein_coding |
| ENSMUSG00000027227  | Sord     | sorbitol dehydrogenase [Source:MGI Symbol;Acc:MGI:98266]                                                                         |        | 60,96525677 | 0,40164823 | <b>1,32101627</b> | 5,93213805 | 6,73883207 | 0,009433637 | 0,034641499 | protein_coding |
| ENSMUSG00000038604  | Fam65a   | family with sequence similarity 65, member A [Source:MGI Symbol;Acc:MGI:1922937]                                                 |        | 36,17935964 | 0,4012312  | <b>1,32063446</b> | 5,1746562  | 8,31417883 | 0,003933678 | 0,016578184 | protein_coding |
| ENSMUSG00000045216  | Hs6st1   | heparan sulfate 6-O-sulfotransferase 1 [Source:MGI Symbol;Acc:MGI:1354958]                                                       |        | 33,02347123 | 0,40114418 | <b>1,3205548</b>  | 5,0498537  | 7,70340437 | 0,005511677 | 0,0201265   | protein_coding |
| ENSMUSG00000031652  | N4bp1    | NEDD4 binding protein 1 [Source:MGI Symbol;Acc:MGI:2136825]                                                                      |        | 89,03274015 | 0,40062561 | <b>1,32008023</b> | 6,48101361 | 9,76852058 | 0,001775252 | 0,008502484 | protein_coding |
| ENSMUSG00000005615  | Pcy1a    | phosphate cytidylyltransferase 1, choline, alpha isoform [Source:MGI Symbol;Acc:MGI:88557]                                       |        | 119,7233923 | 0,39963711 | <b>1,31917605</b> | 6,90313759 | 8,1477303  | 0,004311509 | 0,017902702 | protein_coding |
| ENSMUSG00000024349  | Tmem173  | transmembrane protein 173 [Source:MGI Symbol;Acc:MGI:1919762]                                                                    |        | 25,43465823 | 0,39661074 | <b>1,31951594</b> | 4,67139309 | 7,13923901 | 0,007541516 | 0,028670807 | protein_coding |
| ENSMUSG00000027194  | Ttc17    | tetratricopeptide repeat domain 17 [Source:MGI Symbol;Acc:MGI:1921819]                                                           |        | 38,67044574 | 0,39934949 | <b>1,31891308</b> | 5,27515413 | 8,00577072 | 0,004662851 | 0,019094576 | protein_coding |
| ENSMUSG00000038843  | Gcnt1    | glucosaminyl (N-acetyl) transferase 1, core 2 [Source:MGI Symbol;Acc:MGI:95676]                                                  |        | 57,08931204 | 0,39854559 | <b>1,31817836</b> | 5,83190171 | 7,55229579 | 0,005993367 | 0,023618767 | protein_coding |
| ENSMUSG00000030123  | Plxnd1   | plexin D1 [Source:MGI Symbol;Acc:MGI:2154244]                                                                                    |        | 214,5273076 | 0,39818321 | <b>1,3178473</b>  | 7,74437594 | 7,30697981 | 0,006868728 | 0,026521996 | protein_coding |
| ENSMUSG00000025178  | P4k2a    | phosphatidylinositol 4-kinase type 2 alpha [Source:MGI Symbol;Acc:MGI:1934031]                                                   |        | 156,1042966 | 0,3971332  | <b>1,3168885</b>  | 7,28691086 | 9,19217494 | 0,002430519 | 0,011076043 | protein_coding |
| ENSMUSG00000024953  | Prx5     | peroxiredoxin 5 [Source:MGI Symbol;Acc:MGI:1859821]                                                                              |        | 246,921194  | 0,39651922 | <b>1,31632818</b> | 7,94828199 | 7,45744408 | 0,006317464 | 0,024683492 | protein_coding |
| ENSMUSG00000026627  | Tmem206  | transmembrane protein 206 [Source:MGI Symbol;Acc:MGI:1914200]                                                                    |        | 38,78735578 | 0,39611829 | <b>1,31596242</b> | 5,2796787  | 6,63125764 | 0,010020449 | 0,03649144  | protein_coding |
| ENSMUSG000000061273 | Mmgf1    | membrane magnesium transporter 1 [Source:MGI Symbol;Acc:MGI:2384305]                                                             |        | 35,17902874 | 0,39578768 | <b>1,31566089</b> | 5,14339651 | 7,55807428 | 0,00597418  | 0,023576979 | protein_coding |
| ENSMUSG00000045980  | Tmem104  | transmembrane protein 104 [Source:MGI Symbol;Acc:MGI:2444222]                                                                    |        | 182,9666887 | 0,39546627 | <b>1,31536781</b> | 7,51490707 | 8,20668621 | 0,00417363  | 0,017409141 | protein_coding |
| ENSMUSG00000021504  | B4gal7   | xylosylprotein beta 1,4-galactosyltransferase, polypeptide 7 (galactosyltransferase I) [Source:MGI Symbol;Acc:MGI:2384]          |        | 33,28571761 | 0,39531506 | <b>1,31522995</b> | 5,05454067 | 7,76069705 | 0,005339535 | 0,021426395 | protein_coding |
| ENSMUSG00000026003  | Acad1    | acyl-Coenzyme A dehydrogenase, long-chain [Source:MGI Symbol;Acc:MGI:87866]                                                      |        | 76,74301131 | 0,3949466  | <b>1,31493789</b> | 6,26436729 | 7,66282279 | 0,005637024 | 0,022409565 | protein_coding |
| ENSMUSG00000027514  | Zbp1     | Z-DNA binding protein 1 [Source:MGI Symbol;Acc:MGI:1927449]                                                                      |        | 46,72385401 | 0,39484892 | <b>1,31480507</b> | 5,5539622  | 8,74569579 | 0,003103337 | 0,013616757 | protein_coding |
| ENSMUSG00000032366  | Tpm1     | tropomyosin 1, alpha [Source:MGI Symbol;Acc:MGI:98809]                                                                           |        | 146,0605868 | 0,39440306 | <b>1,31439879</b> | 7,19004892 | 7,25224059 | 0,00708126  | 0,027174923 | protein_coding |
| ENSMUSG00000069359  | Scyl2    | SCY1-like 2 (S. cerevisiae) [Source:MGI Symbol;Acc:MGI:1289172]                                                                  |        | 51,71918092 | 0,39418242 | <b>1,31419779</b> | 5,69765751 | 7,6689875  | 0,005617797 | 0,022327234 | protein_coding |
| ENSMUSG00000003154  | Foxj2    | forkhead box J2 [Source:MGI Symbol;Acc:MGI:1926805]                                                                              |        | 46,89965555 | 0,39385336 | <b>1,31389807</b> | 5,54831047 | 8,28313899 | 0,004001489 | 0,016825245 | protein_coding |
| ENSMUSG00000040268  | Plekha1  | pleckstrin homology domain containing, family A (phosphoinositide binding specific) member 1 [Source:MGI Symbol;Acc:MGI:1889348] |        | 41,76953639 | 0,39380479 | <b>1,31385384</b> | 5,38549123 | 8,12535375 | 0,004365047 | 0,018040748 | protein_coding |
| ENSMUSG00000015597  | Zfp318   | zinc finger protein 318 [Source:MGI Symbol;Acc:MGI:1889348]                                                                      |        | 22,99461124 | 0,39320327 | <b>1,31330615</b> | 4,53128999 | 6,21472221 | 0,012689223 | 0,049800017 | protein_coding |
| ENSMUSG00000041438  | Cirh1a   | cirrhosis, autosomal recessive 1A (human) [Source:MGI Symbol;Acc:MGI:1096573]                                                    |        | 35,66258672 | 0,39165173 | <b>1,31189452</b> | 5,16975546 | 7,35172501 | 0,006699844 | 0,025946841 | protein_coding |
| ENSMUSG00000001150  | Mcm3ap   | minichromosome maintenance deficient 3 (S. cerevisiae) associated protein [Source:MGI Symbol;Acc:MGI:1930089]                    |        | 53,51282457 | 0,39136963 | <b>1,31163802</b> | 5,74535606 | 7,94484934 | 0,004822443 | 0,019601992 | protein_coding |
| ENSMUSG00000036534  | Slc38a7  | solute carrier family 38, member 7 [Source:MGI Symbol;Acc:MGI:2679005]                                                           |        | 84,65518451 | 0,39092531 | <b>1,31123412</b> | 6,4028134  | 9,19254779 | 0,002430024 | 0,011076043 | protein_coding |
| ENSMUSG00000041341  | Atg2b    | autophagy related 2B [Source:MGI Symbol;Acc:MGI:1923809]                                                                         |        | 37,47941271 | 0,39068405 | <b>1,31101487</b> | 5,23237658 | 7,59278051 | 0,00586025  | 0,023177308 | protein_coding |
| ENSMUSG00000027555  | Car13    | carbonic anhydrase 13 [Source:MGI Symbol;Acc:MGI:1931322]                                                                        |        | 68,67433096 | 0,39064819 | <b>1,31098229</b> | 6,10601159 | 8,36154686 | 0,003832442 | 0,016217759 | protein_coding |
| ENSMUSG00000059456  | Ptk2b    | PTK2 protein tyrosine kinase 2 beta [Source:MGI Symbol;Acc:MGI:104908]                                                           |        | 223,3327299 | 0,38953686 | <b>1,3099728</b>  | 7,80312147 | 6,34653026 | 0,011761111 | 0,041562987 | protein_coding |
| ENSMUSG00000073643  | Wdfy1    | WD repeat and FYVE domain containing 1 [Source:MGI Symbol;Acc:MGI:1916618]                                                       |        | 64,09346237 | 0,38946087 | <b>1,3099038</b>  | 6,00546874 | 8,23320532 | 0,004113082 | 0,017215404 | protein_coding |
| ENSMUSG00000024335  | Brd2     | bromodomain containing 2 [Source:MGI Symbol;Acc:MGI:99495]                                                                       |        | 284,7948533 | 0,38921392 | <b>1,3096796</b>  | 8,1539963  | 7,23990174 | 0,007130088 | 0,027333663 | protein_coding |
| ENSMUSG00000039740  | Alg2     | asparagine-linked glycosylation 2 (alpha-1,3-mannosyltransferase) [Source:MGI Symbol;Acc:MGI:1914731]                            |        | 28,68838179 | 0,38839511 | <b>1,3089365</b>  | 4,84895029 | 6,9113163  | 0,008565191 | 0,031900257 | protein_coding |
| ENSMUSG00000039220  | Ppp1r10  | protein phosphatase 1, regulatory subunit 10 [Source:MGI Symbol;Acc:MGI:1289273]                                                 |        | 60,88432549 | 0,38836844 | <b>1,3089123</b>  | 5,92984902 | 8,40788924 | 0,003735962 | 0,01594678  | protein_coding |
| ENSMUSG00000040855  | Reps2    | RALBP1 associated Eps domain containing protein 2 [Source:MGI Symbol;Acc:MGI:2663511]                                            |        | 30,44505076 | 0,38748972 | <b>1,30811531</b> | 4,91861296 | 6,31077221 | 0,012000656 | 0,042205892 | protein_coding |
| ENSMUSG00000033681  | Igf2bp2  | insulin-like growth factor 2 mRNA binding protein 2 [Source:MGI Symbol;Acc:MGI:1890358]                                          |        | 110,0267352 | 0,38729506 | <b>1,30793882</b> | 6,78481945 | 8,22205456 | 0,004138432 | 0,017301732 | protein_coding |
| ENSMUSG00000030619  | Eed      | embryonic ectoderm development [Source:MGI Symbol;Acc:MGI:95286]                                                                 |        | 48,82653927 | 0,38709406 | <b>1,3075661</b>  | 5,61357445 | 8,47454587 | 0,003601503 | 0,015438826 | protein_coding |
| ENSMUSG00000016619  | Nup50    | nucleoporin 50 [Source:MGI Symbol;Acc:MGI:1351502]                                                                               |        | 82,02166954 | 0,38640678 | <b>1,30713376</b> | 6,36072378 | 8,49874351 | 0,003553918 | 0,015243739 | protein_coding |
| ENSMUSG00000035666  | Gtf3ca   | general transcription factor IIIc, polypeptide 4 [Source:MGI Symbol;Acc:MGI:2138937]                                             |        | 39,15082125 | 0,38614115 | <b>1,30689311</b> | 5,29315838 | 7,27568316 | 0,00698943  | 0,026888261 | protein_coding |
| ENSMUSG00000007812  | Zfp655   | zinc finger protein 655 [Source:MGI Symbol;Acc:MGI:1919861]                                                                      |        | 47,82688347 | 0,38600293 | <b>1,30676791</b> | 5,58125398 | 7,77487616 | 0,005297785 | 0,021274401 | protein_coding |
| ENSMUSG00000009112  | Bcl2l13  | BCL2-like 13 (apoptosis facilitator) [Source:MGI Symbol;Acc:MGI:2136959]                                                         |        | 34,06756847 | 0,38491911 | <b>1,30578657</b> | 5,09675147 | 6,70340863 | 0,009622877 | 0,035218706 | protein_coding |
| ENSMUSG00000029428  | Stx2     | syntaxin 2 [Source:MGI Symbol;Acc:MGI:108059]                                                                                    |        | 86,94875375 | 0,38350486 | <b>1,30450716</b> | 6,44241943 | 9,11090297 | 0,002540904 | 0,011464852 | protein_coding |
| ENSMUSG00000011960  | Ccnt1    | cyclin T1 [Source:MGI Symbol;Acc:MGI:1328363]                                                                                    |        | 57,01636304 | 0,38328415 | <b>1,3043076</b>  | 5,83665918 | 7,72041108 | 0,005459996 | 0,021837997 | protein_coding |
| ENSMUSG00000022971  | Ifnar2   | interferon (alpha and beta) receptor 2 [Source:MGI Symbol;Acc:MGI:1098243]                                                       |        | 78,1233663  | 0,38304164 | <b>1,30408837</b> | 6,28887032 | 8,97211871 | 0,002741305 | 0,01222847  | protein_coding |
| ENSMUSG00000032382  | Snx1     | sorting nexin 1 [Source:MGI Symbol;                                                                                              |        |             |            |                   |            |            |             |             |                |

|                    |               |                                                                                                                       |        |              |            |                   |            |            |             |             |                |
|--------------------|---------------|-----------------------------------------------------------------------------------------------------------------------|--------|--------------|------------|-------------------|------------|------------|-------------|-------------|----------------|
| ENSMUSG00000025579 | Gaa           | glucosidase, alpha, acid [Source:MGI Symbol;Acc:MGI:95609]                                                            | Sheet1 | 152,3516213  | 0,38009979 | <b>1,30143187</b> | 7,25111334 | 7,53162328 | 0,006062526 | 0,023857081 | protein_coding |
| ENSMUSG00000020230 | Prmt2         | protein arginine N-methyltransferase 2 [Source:MGI Symbol;Acc:MGI:1316652]                                            |        | 28,82249443  | 0,37953652 | <b>1,30092386</b> | 4,85235788 | 6,35517813 | 0,011703919 | 0,041414158 | protein_coding |
| ENSMUSG00000024696 | Lpxn          | leupaxin [Source:MGI Symbol;Acc:MGI:2147677]                                                                          |        | 122,4229941  | 0,37943189 | <b>1,30082951</b> | 6,93606353 | 8,13642308 | 0,004338478 | 0,019873343 | protein_coding |
| ENSMUSG00000006494 | Pdk1          | pyruvate dehydrogenase kinase, isoenzyme 1 [Source:MGI Symbol;Acc:MGI:1926119]                                        |        | 42,3697947   | 0,37883047 | <b>1,30028731</b> | 5,41289579 | 7,43915261 | 0,006781993 | 0,024900199 | protein_coding |
| ENSMUSG00000024104 | D6Wsu116e     | DNA segment, Chr 6, Wayne State University 116, expressed [Source:MGI Symbol;Acc:MGI:106463]                          |        | 147,623559   | 0,37814233 | <b>1,29966727</b> | 7,20690043 | 7,88293191 | 0,004930351 | 0,020187404 | protein_coding |
| ENSMUSG00000025059 | Gyk           | glycerol kinase [Source:MGI Symbol;Acc:MGI:106594]                                                                    |        | 50,02392045  | 0,37775604 | <b>1,29931933</b> | 5,65159012 | 7,87798351 | 0,005004025 | 0,020227821 | protein_coding |
| ENSMUSG00000054199 | Gon4l         | gon-4-like (C.elegans) [Source:MGI Symbol;Acc:MGI:1917579]                                                            |        | 44,91386604  | 0,37764631 | <b>1,29922051</b> | 5,48946223 | 7,6827592  | 0,005575086 | 0,022241638 | protein_coding |
| ENSMUSG00000006589 | Aprt          | adenine phosphoribosyl transferase [Source:MGI Symbol;Acc:MGI:88061]                                                  |        | 115,252553   | 0,37708106 | <b>1,29871157</b> | 6,8496723  | 7,65499725 | 0,005661528 | 0,022496639 | protein_coding |
| ENSMUSG00000028330 | Ncbp1         | nuclear cap binding protein subunit 1 [Source:MGI Symbol;Acc:MGI:1891840]                                             |        | 46,90384852  | 0,37667667 | <b>1,29834759</b> | 5,55696465 | 7,33135794 | 0,006776184 | 0,026187103 | protein_coding |
| ENSMUSG00000060538 | Tmem219       | transmembrane protein 219 [Source:MGI Symbol;Acc:MGI:1915992]                                                         |        | 28,31584958  | 0,37499245 | <b>1,29683276</b> | 4,81599503 | 6,35321897 | 0,011716851 | 0,041446568 | protein_coding |
| ENSMUSG00000002147 | Stat6         | signal transducer and activator of transcription 6 [Source:MGI Symbol;Acc:MGI:103034]                                 |        | 246,8831908  | 0,37435416 | <b>1,29625914</b> | 7,94778426 | 7,06118192 | 0,007877201 | 0,029782109 | protein_coding |
| ENSMUSG00000017802 | Fam134c       | family with sequence similarity 134, member C [Source:MGI Symbol;Acc:MGI:1915248]                                     |        | 63,83978021  | 0,37343228 | <b>1,29543109</b> | 5,99986549 | 7,96547174 | 0,004767806 | 0,019437145 | protein_coding |
| ENSMUSG00000091512 | Lamtor3       | late endosomal/lysosomal adaptor, MAPK and MTOR activator 3 [Source:MGI Symbol;Acc:MGI:1929467]                       |        | 75,4724898   | 0,37317861 | <b>1,29520334</b> | 6,23879969 | 7,42888889 | 0,006418496 | 0,025015969 | protein_coding |
| ENSMUSG00000066148 | Prpf4         | PRPF4 pre-mRNA processing factor 4 homolog (yeast) [Source:MGI Symbol;Acc:MGI:1917302]                                |        | 26,31342321  | 0,37184279 | <b>1,29400464</b> | 4,72367017 | 6,49484686 | 0,010818761 | 0,038731096 | protein_coding |
| ENSMUSG00000027531 | Impa1         | inositol (myo)-1(or 4)-monophosphatase 1 [Source:MGI Symbol;Acc:MGI:1933158]                                          |        | 45,11581251  | 0,37168091 | <b>1,29385945</b> | 5,4997317  | 7,3426833  | 0,006733625 | 0,026059296 | protein_coding |
| ENSMUSG00000004394 | Tmed4         | transmembrane emp24 protein transport domain containing 4 [Source:MGI Symbol;Acc:MGI:1915070]                         |        | 44,80825114  | 0,37162918 | <b>1,29381306</b> | 5,49035854 | 7,14264065 | 0,007527224 | 0,028626379 | protein_coding |
| ENSMUSG00000075600 | Zc3h3         | zinc finger CCHC type containing 3 [Source:MGI Symbol;Acc:MGI:2663721]                                                |        | 25,23158344  | 0,37100465 | <b>1,2932531</b>  | 4,65629475 | 9,59087202 | 0,014710008 | 0,049470111 | protein_coding |
| ENSMUSG00000015839 | Nfe2l2        | nuclear factor, erythroid derived 2, like 2 [Source:MGI Symbol;Acc:MGI:108420]                                        |        | 230,5117233  | 0,37098792 | <b>1,2932381</b>  | 7,8495865  | 6,71224517 | 0,009575309 | 0,035083256 | protein_coding |
| ENSMUSG00000073987 | Ggh           | gamma-glutamyl hydrolase [Source:MGI Symbol;Acc:MGI:1329035]                                                          |        | 45,473641826 | 0,37071491 | <b>1,2929934</b>  | 5,52234791 | 7,29158975 | 0,006927815 | 0,026669901 | protein_coding |
| ENSMUSG00000049643 | 2310022A10Rik | RIKEN cDNA 2310022A10 gene [Source:MGI Symbol;Acc:MGI:1913617]                                                        |        | 45,88042964  | 0,37070988 | <b>1,29298889</b> | 5,50636373 | 6,29960627 | 0,012076479 | 0,042421335 | protein_coding |
| ENSMUSG00000022462 | Slc38a2       | solute carrier family 38, member 2 [Source:MGI Symbol;Acc:MGI:1915010]                                                |        | 128,9600303  | 0,37035912 | <b>1,29267457</b> | 7,01099975 | 7,72924782 | 0,005433338 | 0,021747207 | protein_coding |
| ENSMUSG00000002741 | Ykt6          | YKT6 homolog (S. cerevisiae) [Source:MGI Symbol;Acc:MGI:1927550]                                                      |        | 135,3698946  | 0,37016123 | <b>1,29249727</b> | 7,08142244 | 7,93923003 | 0,004837441 | 0,019641921 | protein_coding |
| ENSMUSG00000028779 | Pef1          | penta-EF hand domain containing 1 [Source:MGI Symbol;Acc:MGI:1915148]                                                 |        | 46,21432036  | 0,36963582 | <b>1,29202665</b> | 5,53123323 | 7,47404166 | 0,006259487 | 0,02450053  | protein_coding |
| ENSMUSG00000041515 | Irf8          | interferon regulatory factor 8 [Source:MGI Symbol;Acc:MGI:96395]                                                      |        | 142,3512083  | 0,36731243 | <b>1,28994757</b> | 7,15299927 | 8,05755121 | 0,004531439 | 0,018639805 | protein_coding |
| ENSMUSG00000025068 | Gsto1         | glutathione S-transferase omega 1 [Source:MGI Symbol;Acc:MGI:1342273]                                                 |        | 71,48207738  | 0,36720749 | <b>1,28985375</b> | 6,15990379 | 6,58094168 | 0,003735966 | 0,037335966 | protein_coding |
| ENSMUSG00000039530 | Tusc3         | tumor suppressor candidate 3 [Source:MGI Symbol;Acc:MGI:1933134]                                                      |        | 27,15801933  | 0,36658721 | <b>1,2892993</b>  | 4,76882868 | 6,14427333 | 0,013183833 | 0,045379315 | protein_coding |
| ENSMUSG00000019943 | Atp2b1        | ATPase, Ca++ transporting, plasma membrane 1 [Source:MGI Symbol;Acc:MGI:104653]                                       |        | 208,8385256  | 0,36558355 | <b>1,28840267</b> | 7,7067896  | 6,9076345  | 0,008582847 | 0,03195518  | protein_coding |
| ENSMUSG00000025234 | Arih1         | ariadne ubiquitin-conjugating enzyme E2 binding protein homolog 1 (Drosophila) [Source:MGI Symbol;Acc:MGI:1344363]    |        | 135,8823513  | 0,36556001 | <b>1,28838165</b> | 7,08605845 | 7,1309134  | 0,007576612 | 0,028774365 | protein_coding |
| ENSMUSG00000025510 | Cd151         | CD151 antigen [Source:MGI Symbol;Acc:MGI:1096360]                                                                     |        | 52,90176782  | 0,36439479 | <b>1,28734148</b> | 5,73020686 | 6,4313708  | 0,011221201 | 0,039918488 | protein_coding |
| ENSMUSG00000048379 | Scs4          | suppressor of cytokine signaling 4 [Source:MGI Symbol;Acc:MGI:1914546]                                                |        | 41,82384373  | 0,36378424 | <b>1,28679679</b> | 5,38524994 | 6,82094707 | 0,009009478 | 0,03335146  | protein_coding |
| ENSMUSG00000001082 | Mfsd10        | major facilitator superfamily domain containing 10 [Source:MGI Symbol;Acc:MGI:1915544]                                |        | 36,42895817  | 0,3635423  | <b>1,28658101</b> | 5,18514776 | 6,78682909 | 0,009183288 | 0,033843906 | protein_coding |
| ENSMUSG00000022270 | Fam134b       | family with sequence similarity 134, member B [Source:MGI Symbol;Acc:MGI:1913520]                                     |        | 44,66084576  | 0,36269146 | <b>1,28582246</b> | 5,48528992 | 7,5179906  | 0,006118078 | 0,023986758 | protein_coding |
| ENSMUSG00000039952 | Dntip2        | deoxynucleotidyltransferase, terminal, interacting protein 2 [Source:MGI Symbol;Acc:MGI:1923173]                      |        | 59,81766718  | 0,36265776 | <b>1,28579243</b> | 5,90657746 | 7,23991407 | 0,007130039 | 0,027333663 | protein_coding |
| ENSMUSG00000030720 | Cln3          | ceroid lipofuscinosis, neuronal 3, juvenile (Batten, Spielmeier-Vogt disease) [Source:MGI Symbol;Acc:MGI:107537]      |        | 101,4190857  | 0,36260177 | <b>1,28574253</b> | 6,66461909 | 7,98808187 | 0,004708627 | 0,019239007 | protein_coding |
| ENSMUSG00000057554 | Lgals8        | lectin, galactose binding, soluble 8 [Source:MGI Symbol;Acc:MGI:1928481]                                              |        | 97,67262183  | 0,36046414 | <b>1,28383886</b> | 6,61281179 | 6,71715573 | 0,009548979 | 0,035006552 | protein_coding |
| ENSMUSG00000023068 | Nus1          | nuclear undecaprenyl pyrophosphate synthase 1 homolog (S. cerevisiae) [Source:MGI Symbol;Acc:MGI:1196365]             |        | 109,5198354  | 0,35947834 | <b>1,28296191</b> | 6,77683832 | 7,30386374 | 0,006880649 | 0,026551846 | protein_coding |
| ENSMUSG00000039662 | Icmt          | isoprenylcysteine carboxyl methyltransferase [Source:MGI Symbol;Acc:MGI:1888594]                                      |        | 44,39582341  | 0,3589448  | <b>1,28248753</b> | 5,47217157 | 6,86929885 | 0,008769905 | 0,032548635 | protein_coding |
| ENSMUSG00000034974 | Dapk3         | death-associated protein kinase 3 [Source:MGI Symbol;Acc:MGI:1203520]                                                 |        | 31,25331264  | 0,35889225 | <b>1,28244082</b> | 4,96130831 | 6,32482077 | 0,01195952  | 0,041939947 | protein_coding |
| ENSMUSG00000057738 | Spna2         | spectrin alpha 2 [Source:MGI Symbol;Acc:MGI:98386]                                                                    |        | 207,0211487  | 0,35612256 | <b>1,27998115</b> | 7,69441231 | 6,4101441  | 0,011347021 | 0,040346186 | protein_coding |
| ENSMUSG00000022551 | Cyc1          | cytochrome c-1 [Source:MGI Symbol;Acc:MGI:1913695]                                                                    |        | 82,21982586  | 0,35601948 | <b>1,2798997</b>  | 6,36309661 | 7,50722358 | 0,006145203 | 0,024104727 | protein_coding |
| ENSMUSG00000005697 | Prkaa1        | protein kinase, AMP-activated, alpha 1 catalytic subunit [Source:MGI Symbol;Acc:MGI:2145955]                          |        | 61,4554062   | 0,35520525 | <b>1,27916755</b> | 5,94469451 | 6,91200087 | 0,005561913 | 0,031898859 | protein_coding |
| ENSMUSG00000030595 | Nfkb1         | nuclear factor of kappa light polypeptide gene enhancer in B cells inhibitor, beta [Source:MGI Symbol;Acc:MGI:104752] |        | 33,38702057  | 0,35517368 | <b>1,27913956</b> | 5,06293427 | 6,24493093 | 0,012454924 | 0,043366638 | protein_coding |
| ENSMUSG00000029501 | Ank2          | ankyrin repeat and LEM domain containing 2 [Source:MGI Symbol;Acc:MGI:1261856]                                        |        | 47,42322845  | 0,35459987 | <b>1,27863091</b> | 5,56991122 | 6,81517562 | 0,009038641 | 0,033436887 | protein_coding |
| ENSMUSG00000030741 | Spns1         | spinster homolog 1 [Source:MGI Symbol;Acc:MGI:1920908]                                                                |        | 39,82078839  | 0,35458513 | <b>1,27861785</b> | 5,31119688 | 6,00022251 | 0,014304074 | 0,048401252 | protein_coding |
| ENSMUSG00000029922 | Mkrm1         | makorin, ring finger protein, 1 [Source:MGI Symbol;Acc:MGI:1859353]                                                   |        | 89,94834702  | 0,35380778 | <b>1,27792908</b> | 6,4916554  | 7,23593701 | 0,007145851 | 0,027365445 | protein_coding |
| ENSMUSG00000022193 | Psmb5         | proteasome (prosome, macropain) subunit, beta type 5 [Source:MGI Symbol;Acc:MGI:1194513]                              |        | 120,0323976  | 0,35340485 | <b>1,27757222</b> | 6,90837242 | 6,80148967 | 0,009108185 | 0,033648832 | protein_coding |
| ENSMUSG00000022974 | Gcfc1         | GC-rich sequence DNA-binding factor 1 [Source:MGI Symbol;Acc:MGI:1914617]                                             |        | 53,93247088  | 0,3513394  | <b>1,27574448</b> | 5,74878525 | 6,9266905  | 0,008491868 | 0,031670115 | protein_coding |
| ENSMUSG00000037434 | Slc30a1       | solute carrier family 30 (zinc transporter), member 1 [Source:MGI Symbol;Acc:MGI:1345281]                             |        | 45,35030437  | 0,35036238 | <b>1,27488082</b> | 5,50976946 | 6,15874509 | 0,013076395 | 0,045122597 | protein_coding |
| ENSMUSG00000071203 | Naip5         | NLR family, apoptosis inhibitory protein 5 [Source:MGI Symbol;Acc:MGI:1298220]                                        |        | 38,9383954   | 0,34927884 | <b>1,27392367</b> | 5,2793198  | 6,2606595  | 0,012344824 | 0,043103852 | protein_coding |
| ENSMUSG00000078606 | Gm4070        | predicted gene 4070 [Source:MGI Symbol;Acc:MGI:3782245]                                                               |        | 143,3884141  | 0,34786632 | <b>1,27267701</b> | 7,16522888 | 6,65809749 | 0,009870624 | 0,036005494 | protein_coding |
| ENSMUSG00000017801 | Mix           | MAX-like protein X [Source:MGI Symbol;Acc:MGI:108398]                                                                 |        | 34,7206216   | 0,34782282 | <b>1,27263863</b> | 5,12341412 | 5,9870856  | 0,014410993 | 0,048703038 | protein_coding |
| ENSMUSG00000003288 | Spg21         | spastic paraplegia 21 homolog (human) [Source:MGI Symbol;Acc:MGI:106403]                                              |        | 91,59160569  | 0,34722857 | <b>1,27211453</b> | 6,51818292 | 6,84670783 | 0,008880477 | 0,032918285 | protein_coding |
| ENSMUSG00000040761 | Spn           | SPEN homolog, transcriptional regulator (Drosophila) [Source:MGI Symbol;Acc:MGI:1891706]                              |        | 107,4350492  | 0,34701196 | <b>1,27192356</b> | 6,74748101 | 7,67888646 | 0,005587063 | 0,022279228 | protein_coding |
| ENSMUSG00000028156 | Eif4e         | eukaryotic translation initiation factor 4E [Source:MGI Symbol;Acc:MGI:95305]                                         |        | 145,9563582  | 0,34640949 | <b>1,27139251</b> | 7,1917008  | 6,81589701 | 0,010672938 | 0,038359034 | protein_coding |
| ENSMUSG00000038780 | Smurf1        | SMAD specific E3 ubiquitin protein ligase 1 [Source:MGI Symbol;Acc:MGI:1923038]                                       |        | 50,67935465  | 0,34380905 | <b>1,2691029</b>  | 5,6626703  | 6,59962798 | 0,010200008 | 0,037010398 | protein_coding |
| ENSMUSG00000026262 | Ppp2r5a       | protein phosphatase 2, regulatory subunit B (B56), alpha isoform [Source:MGI Symbol;Acc:MGI:2388479]                  |        | 81,33861445  | 0,34367509 | <b>1,26898506</b> | 6,34736936 | 7,38055487 | 0,006593283 | 0,025588271 | protein_coding |
| ENSMUSG00000024077 | Strn          | striatin, calmodulin binding protein [Source:MGI Symbol;Acc:MGI:1333757]                                              |        | 62,8396145   | 0,34336299 | <b>1,26871057</b> | 5,97732740 | 6,35207591 | 0,011744008 | 0,041459953 | protein_coding |
| ENSMUSG00000071054 | Safb          | scaffold attachment factor B [Source:MGI Symbol;Acc:MGI:2146974]                                                      |        | 58,523966    | 0,34274498 | <b>1,26816721</b> | 5,86860502 | 6,8098044  | 0,00906587  | 0,033526324 | protein_coding |
| ENSMUSG00000013662 | Atad1         | ATPase family, AAA domain containing 1 [Source:MGI Symbol;Acc:MGI:1915229]                                            |        | 59,66191397  | 0,34256356 | <b>1,26800775</b> | 5,90177883 | 6,33780099 | 0,011819132 | 0,041727765 | protein_coding |
| ENSMUSG00000015341 | Golga7        | golgi autoantigen, golgin subfamily a, 7 [Source:MGI Symbol;Acc:MGI:1931029]                                          |        | 89,00039824  | 0,34233415 | <b>1,26780613</b> | 6,47840626 | 7,23771903 | 0,007138761 | 0,027357367 | protein_coding |
| ENSMUSG00000021114 | Atp6v1d       | ATPase, H+ transporting, lysosomal V1 subunit D [Source:MGI Symbol;Acc:MGI:1921084]                                   |        | 120,8613289  | 0,34130086 | <b>1,26689843</b> | 6,91864951 | 6,5771     |             |             |                |



|                     |               |                                                                                                                                       |  |        |             |            |                    |            |            |             |              |                |
|---------------------|---------------|---------------------------------------------------------------------------------------------------------------------------------------|--|--------|-------------|------------|--------------------|------------|------------|-------------|--------------|----------------|
| ENSMUSG00000030805  | Stx4a         | syntaxin 4A (placental) [Source:MGI Symbol;Acc:MGI:893577]                                                                            |  | Sheet1 | 102.3879388 | 0,33347461 | <b>1,26004443</b>  | 6,67891037 | 6,51104331 | 0,010720659 | 0,038429977  | protein_coding |
| ENSMUSG00000006736  | Tspan31       | tetraspanin 31 [Source:MGI Symbol;Acc:MGI:1914375]                                                                                    |  |        | 78,09492766 | 0,33237357 | <b>1,25908316</b>  | 6,28998075 | 6,19363743 | 0,01282104  | 0,044416297  | protein_coding |
| ENSMUSG00000006420  | Mocs1         | molybdenum cofactor synthesis 1 [Source:MGI Symbol;Acc:MGI:1928904]                                                                   |  |        | 43,07010355 | 0,3309906  | <b>1,25787678</b>  | 5,43170483 | 5,97687465 | 0,014494666 | 0,048940655  | protein_coding |
| ENSMUSG00000022000  | Zc3h13        | zinc finger CCH type containing 13 [Source:MGI Symbol;Acc:MGI:1914552]                                                                |  |        | 52,07149181 | 0,33016432 | <b>1,25715656</b>  | 5,70129652 | 6,1138124  | 0,01341295  | 0,04603814   | protein_coding |
| ENSMUSG00000027889  | Ampd2         | adenosine monophosphate deaminase 2 [Source:MGI Symbol;Acc:MGI:88016]                                                                 |  |        | 58,58478576 | 0,3283635  | <b>1,25558831</b>  | 5,86125129 | 6,10173255 | 0,013504941 | 0,04625274   | protein_coding |
| ENSMUSG00000022508  | Bcl6          | B cell leukemia/lymphoma 6 [Source:MGI Symbol;Acc:MGI:107187]                                                                         |  |        | 79,58151711 | 0,32823016 | <b>1,25547227</b>  | 6,31546526 | 6,70461962 | 0,009616344 | 0,035206523  | protein_coding |
| ENSMUSG00000041926  | Rnpep         | arginyl aminopeptidase (aminopeptidase B) [Source:MGI Symbol;Acc:MGI:2384902]                                                         |  |        | 176,6578374 | 0,32705412 | <b>1,25444926</b>  | 7,46535073 | 6,0926375  | 0,01357463  | 0,046419067  | protein_coding |
| ENSMUSG00000021831  | Ero11         | ERO1-like (S. cerevisiae) [Source:MGI Symbol;Acc:MGI:1354385]                                                                         |  |        | 110,2183924 | 0,32248069 | <b>1,25047887</b>  | 6,78745524 | 6,28442798 | 0,012180339 | 0,042701142  | protein_coding |
| ENSMUSG00000021109  | Hif1a         | hypoxia inducible factor 1, alpha subunit [Source:MGI Symbol;Acc:MGI:106918]                                                          |  |        | 142,7230366 | 0,32107774 | <b>1,24980909</b>  | 7,15849866 | 6,16063291 | 0,013062446 | 0,045102796  | protein_coding |
| ENSMUSG00000030452  | Nipa2         | non imprinted in Prader-Willi/Angelman syndrome 2 homolog (human) [Source:MGI Symbol;Acc:MGI:1913918]                                 |  |        | 71,16000481 | 0,32169294 | <b>1,24979627</b>  | 6,15581308 | 6,20987261 | 0,012703977 | 0,044086733  | protein_coding |
| ENSMUSG00000002658  | Gt2f1         | general transcription factor IIF, polypeptide 1 [Source:MGI Symbol;Acc:MGI:1923848]                                                   |  |        | 82,85950005 | 0,31325148 | <b>1,24250484</b>  | 6,37306213 | 6,14622786 | 0,013169927 | 0,045357525  | protein_coding |
| ENSMUSG00000068856  | Sf3b4         | splicing factor 3b, subunit 4 [Source:MGI Symbol;Acc:MGI:109580]                                                                      |  |        | 85,48424384 | 0,31171375 | <b>1,2411812</b>   | 6,47151332 | 6,05674942 | 0,013853245 | 0,047195534  | protein_coding |
| ENSMUSG00000031545  | Agpat6        | 1-acylglycerol-3-phosphate O-acyltransferase 6 (lysophosphatidic acid acyltransferase, zeta) [Source:MGI Symbol;Acc:MGI:1267523]      |  |        | 81,43941307 | 0,31053587 | <b>1,24016825</b>  | 6,35032178 | 5,96639005 | 0,014581101 | 0,049111759  | protein_coding |
| ENSMUSG00000043004  | Gng2          | guanine nucleotide binding protein (G protein), gamma 2 [Source:MGI Symbol;Acc:MGI:102705]                                            |  |        | 98,92475965 | -0,309336  | <b>-1,2391373</b>  | 6,6268706  | 6,1661737  | 0,013021595 | 0,04499002   | protein_coding |
| ENSMUSG00000024997  | Prdx3         | peroxiredoxin 3 [Source:MGI Symbol;Acc:MGI:88034]                                                                                     |  |        | 88,78955888 | -0,3119027 | <b>-1,24134377</b> | 6,47307417 | 6,05754663 | 0,013846992 | 0,047188865  | protein_coding |
| ENSMUSG00000006057  | Atp5g1        | ATP synthase, H+ transporting, mitochondrial F0 complex, subunit c1 (subunit 9) [Source:MGI Symbol;Acc:MGI:107653]                    |  |        | 71,65179268 | -0,314141  | <b>-1,24237119</b> | 6,16008923 | 6,02505681 | 0,014104178 | 0,04784273   | protein_coding |
| ENSMUSG00000056941  | Comm7d        | COMM domain containing 7 [Source:MGI Symbol;Acc:MGI:1914197]                                                                          |  |        | 74,87045364 | -0,3159119 | <b>-1,24497821</b> | 6,224665   | 5,93619062 | 0,014833044 | 0,049083122  | protein_coding |
| ENSMUSG00000074212  | Dnajb14       | Dnaj (Hsp40) homolog, subfamily B, member 14 [Source:MGI Symbol;Acc:MGI:1917854]                                                      |  |        | 91,62176373 | -0,3167334 | <b>-1,24550721</b> | 6,51721847 | 6,10212202 | 0,013501965 | 0,04625274   | protein_coding |
| ENSMUSG00000032481  | Smarrc1       | SWI/SNF related, matrix associated, actin dependent regulator of chromatin, subfamily c, member 1 [Source:MGI Symbol;Acc:MGI:1276523] |  |        | 94,7268046  | -0,317133  | <b>-1,24585223</b> | 6,56719804 | 6,08067562 | 0,01366689  | 0,0466618    | protein_coding |
| ENSMUSG00000040848  | Sft2d2        | SFT2 domain containing 2 [Source:MGI Symbol;Acc:MGI:1917362]                                                                          |  |        | 104,7964734 | -0,3177035 | <b>-1,24634506</b> | 6,71020584 | 6,39660893 | 0,011433856 | 0,040549959  | protein_coding |
| ENSMUSG00000027170  | Eif3m         | eukaryotic translation initiation factor 3, subunit M [Source:MGI Symbol;Acc:MGI:1351744]                                             |  |        | 101,9273491 | -0,319025  | <b>-1,24748716</b> | 6,67044551 | 6,0653588  | 0,013785874 | 0,047038945  | protein_coding |
| ENSMUSG00000020580  | Rock2         | Rho-associated coiled-coil containing protein kinase 2 [Source:MGI Symbol;Acc:MGI:107926]                                             |  |        | 104,9923663 | -0,319473  | <b>-1,24787466</b> | 6,71376454 | 6,51381582 | 0,010730958 | 0,038395162  | protein_coding |
| ENSMUSG00000025224  | Gbf1          | golgi-specific brefeldin A-resistance factor 1 [Source:MGI Symbol;Acc:MGI:1861607]                                                    |  |        | 89,39334802 | -0,320149  | <b>-1,24845949</b> | 6,48221813 | 6,27151649 | 0,012269409 | 0,042920632  | protein_coding |
| ENSMUSG00000020647  | Ncoa1         | nuclear receptor coactivator 1 [Source:MGI Symbol;Acc:MGI:1276523]                                                                    |  |        | 67,36243824 | -0,3209853 | <b>-1,24918343</b> | 6,06968716 | 6,1650890  | 0,013029641 | 0,045003669  | protein_coding |
| ENSMUSG00000062901  | Khlh24        | kelch-like 24 (Drosophila) [Source:MGI Symbol;Acc:MGI:1923035]                                                                        |  |        | 102,4889002 | -0,3219333 | <b>-1,25000448</b> | 6,67671865 | 6,22706422 | 0,012581215 | 0,04372438   | protein_coding |
| ENSMUSG00000021774  | Ube2e1        | ubiquitin-conjugating enzyme E2E 1 [Source:MGI Symbol;Acc:MGI:107411]                                                                 |  |        | 68,82957941 | -0,3219372 | <b>-1,25000788</b> | 6,10400158 | 5,97154221 | 0,014535856 | 0,049013551  | protein_coding |
| ENSMUSG00000018585  | Atox1         | ATX1 (antioxidant protein 1) homolog 1 (yeast) [Source:MGI Symbol;Acc:MGI:1333855]                                                    |  |        | 83,18615235 | -0,3241634 | <b>-1,25193824</b> | 6,37447443 | 6,39229002 | 0,011461707 | 0,040635616  | protein_coding |
| ENSMUSG00000032633  | Ficn          | folliculin [Source:MGI Symbol;Acc:MGI:2442184]                                                                                        |  |        | 119,9634085 | -0,3243733 | <b>-1,25212041</b> | 6,90400791 | 6,19278147 | 0,012827242 | 0,044416297  | protein_coding |
| ENSMUSG00000067194  | Eif1ax        | eukaryotic translation initiation factor 1A, X-linked [Source:MGI Symbol;Acc:MGI:1913485]                                             |  |        | 116,3322971 | -0,3245477 | <b>-1,25227174</b> | 6,86324806 | 6,25831464 | 0,012361174 | 0,043103852  | protein_coding |
| ENSMUSG00000031295  | Phka2         | phosphorylase kinase alpha 2 [Source:MGI Symbol;Acc:MGI:97577]                                                                        |  |        | 91,15027484 | -0,3251566 | <b>-1,25280038</b> | 6,50679634 | 6,31506835 | 0,011971613 | 0,0421144221 | protein_coding |
| ENSMUSG00000039770  | Ypel5         | yippee-like 5 (Drosophila) [Source:MGI Symbol;Acc:MGI:1916937]                                                                        |  |        | 98,22741051 | -0,3254158 | <b>-1,25302556</b> | 6,61690351 | 6,29947726 | 0,012077358 | 0,042421335  | protein_coding |
| ENSMUSG00000034940  | Syndr         | synergyn, gamma [Source:MGI Symbol;Acc:MGI:1354742]                                                                                   |  |        | 69,37779906 | -0,3259147 | <b>-1,25345889</b> | 6,11705939 | 6,33187984 | 0,011858655 | 0,041828982  | protein_coding |
| ENSMUSG00000031154  | Otu5          | OTU domain containing 5 [Source:MGI Symbol;Acc:MGI:1859615]                                                                           |  |        | 106,2084952 | -0,3260666 | <b>-1,25359085</b> | 6,72955312 | 6,09544201 | 0,013553102 | 0,046388764  | protein_coding |
| ENSMUSG00000042404  | Dennd4b       | DENN/MADD domain containing 4B [Source:MGI Symbol;Acc:MGI:2446201]                                                                    |  |        | 120,0541054 | -0,3263687 | <b>-1,25385534</b> | 6,90383419 | 6,25323255 | 0,012396687 | 0,043197718  | protein_coding |
| ENSMUSG00000073676  | Hspe1         | heat shock protein 1 (chaperonin 10) [Source:MGI Symbol;Acc:MGI:104680]                                                               |  |        | 77,6791006  | -0,3274103 | <b>-1,25475896</b> | 6,27929015 | 6,29850885 | 0,012083958 | 0,04242761   | protein_coding |
| ENSMUSG00000039997  | Ifi203        | interferon activated gene 203 [Source:MGI Symbol;Acc:MGI:96428]                                                                       |  |        | 63,9589638  | -0,3277384 | <b>-1,25504442</b> | 5,99566051 | 6,1985437  | 0,012785547 | 0,044327802  | protein_coding |
| ENSMUSG00000019868  | Vta1          | Vps20-associated 1 homolog (S. cerevisiae) [Source:MGI Symbol;Acc:MGI:1913451]                                                        |  |        | 51,53045458 | -0,3283893 | <b>-1,25561073</b> | 5,68602624 | 5,97948269 | 0,014473247 | 0,048989389  | protein_coding |
| ENSMUSG00000020564  | Atnx711       | ataxin 7-like 1 [Source:MGI Symbol;Acc:MGI:3584458]                                                                                   |  |        | 54,48650636 | -0,3284429 | <b>-1,25565745</b> | 5,76292064 | 6,03185066 | 0,014049995 | 0,047668481  | protein_coding |
| ENSMUSG00000017485  | Top2b         | topoisomerase (DNA) II beta [Source:MGI Symbol;Acc:MGI:98791]                                                                         |  |        | 90,98984196 | -0,3294152 | <b>-1,25650391</b> | 6,50479944 | 6,36639375 | 0,011630171 | 0,041166459  | protein_coding |
| ENSMUSG00000028790  | Khdrbs1       | KH domain containing, RNA binding, signal transduction associated 1 [Source:MGI Symbol;Acc:MGI:893579]                                |  |        | 139,1955802 | -0,3302819 | <b>-1,25725904</b> | 7,12051948 | 6,47946719 | 0,010912769 | 0,038991413  | protein_coding |
| ENSMUSG00000031532  | Tmem66        | transmembrane protein 66 [Source:MGI Symbol;Acc:MGI:1951137]                                                                          |  |        | 149,062394  | -0,3309564 | <b>-1,25784693</b> | 7,21973164 | 6,48238194 | 0,010894889 | 0,038952861  | protein_coding |
| ENSMUSG00000056608  | Chd9          | chromodomain helicase DNA binding protein 9 [Source:MGI Symbol;Acc:MGI:1924001]                                                       |  |        | 77,98896893 | -0,331829  | <b>-1,25860801</b> | 6,28230071 | 6,62432038 | 0,010059552 | 0,03656927   | protein_coding |
| ENSMUSG00000030216  | Wbp11         | WW domain binding protein 11 [Source:MGI Symbol;Acc:MGI:1891823]                                                                      |  |        | 151,1286573 | -0,3324485 | <b>-1,25914856</b> | 7,23951995 | 6,1552746  | 0,013102077 | 0,045197025  | protein_coding |
| ENSMUSG00000029817  | Tra2a         | transformer 2 alpha homolog (Drosophila) [Source:MGI Symbol;Acc:MGI:1933972]                                                          |  |        | 59,32271743 | -0,3326129 | <b>-1,25929201</b> | 5,89196817 | 6,24126325 | 0,012480742 | 0,043421759  | protein_coding |
| ENSMUSG00000033355  | Rtp4          | receptor transporter protein 4 [Source:MGI Symbol;Acc:MGI:1915025]                                                                    |  |        | 129,0770383 | -0,3341927 | <b>-1,26067174</b> | 7,01251558 | 6,43455404 | 0,011192225 | 0,039872854  | protein_coding |
| ENSMUSG00000039682  | Lap3          | leucine aminopeptidase 3 [Source:MGI Symbol;Acc:MGI:1914238]                                                                          |  |        | 58,11543512 | -0,3341948 | <b>-1,26067356</b> | 5,86401893 | 6,39869156 | 0,01142045  | 0,040549959  | protein_coding |
| ENSMUSG00000036002  | B230312A22Rik | RIKEN cDNA B230312A22 gene [Source:MGI Symbol;Acc:MGI:2441854]                                                                        |  |        | 133,3726464 | -0,3345193 | <b>-1,26095715</b> | 7,05761786 | 6,26391151 | 0,012322185 | 0,04306102   | protein_coding |
| ENSMUSG00000025511  | Tspan4        | tetraspanin 4 [Source:MGI Symbol;Acc:MGI:1928097]                                                                                     |  |        | 91,02739073 | -0,3348267 | <b>-1,26122593</b> | 6,50589521 | 6,72057046 | 0,009530714 | 0,034951252  | protein_coding |
| ENSMUSG000000079557 | 41335         | membrane-associated ring finger (C3HC4) 2 [Source:MGI Symbol;Acc:MGI:1925915]                                                         |  |        | 49,43751054 | -0,335239  | <b>-1,26158636</b> | 5,62452046 | 6,39813448 | 0,011424034 | 0,040549959  | protein_coding |
| ENSMUSG00000006095  | Tbcb          | tubulin folding cofactor B [Source:MGI Symbol;Acc:MGI:1913661]                                                                        |  |        | 70,2356665  | -0,3355078 | <b>-1,26182145</b> | 6,13198038 | 6,36950976 | 0,011609766 | 0,041107478  | protein_coding |
| ENSMUSG000000068329 | Htra2         | HtrA serine peptidase 2 [Source:MGI Symbol;Acc:MGI:1928676]                                                                           |  |        | 63,69404694 | -0,3355156 | <b>-1,26182832</b> | 5,98852854 | 6,00999347 | 0,01422508  | 0,04817847   | protein_coding |
| ENSMUSG000000066357 | Wdr6          | WD repeat domain 6 [Source:MGI Symbol;Acc:MGI:1930140]                                                                                |  |        | 41,82210382 | -0,3364313 | <b>-1,26262941</b> | 5,37901415 | 6,06342822 | 0,013800952 | 0,04704656   | protein_coding |
| ENSMUSG00000033272  | Slc35a4       | solute carrier family 35, member A4 [Source:MGI Symbol;Acc:MGI:1915093]                                                               |  |        | 111,1470762 | -0,3364427 | <b>-1,26263939</b> | 6,79415229 | 6,51434475 | 0,010700774 | 0,038395162  | protein_coding |
| ENSMUSG00000033953  | Ppp3r1        | protein phosphatase 3, regulatory subunit B, alpha isoform (calcineurin B, type I) [Source:MGI Symbol;Acc:MGI:1071772]                |  |        | 210,4019168 | -0,3367046 | <b>-1,26286869</b> | 7,71669622 | 6,09356528 | 0,013657504 | 0,04641582   | protein_coding |
| ENSMUSG00000029763  | Exoc4         | exocyst complex component 4 [Source:MGI Symbol;Acc:MGI:1096376]                                                                       |  |        | 126,0854183 | -0,3371813 | <b>-1,26328603</b> | 6,97816655 | 6,70564367 | 0,009610823 | 0,035198038  | protein_coding |
| ENSMUSG00000019373  | Cops3         | COP9 (constitutive photomorphogenic) homolog, subunit 3 (Arabidopsis thaliana) [Source:MGI Symbol;Acc:MGI:134940]                     |  |        | 50,0307381  | -0,3374718 | <b>-1,26354038</b> | 5,64578731 | 5,94347583 | 0,014771859 | 0,049649654  | protein_coding |
| ENSMUSG00000026511  | Srp9          | signal recognition particle 9 [Source:MGI Symbol;Acc:MGI:1350930]                                                                     |  |        | 55,31386875 | -0,3391747 | <b>-1,26503271</b> | 5,78680567 | 6,15079678 | 0,013135291 | 0,045283164  | protein_coding |
| ENSMUSG00000031221  | Igcbp3        | immunoglobulin (CD79A) binding protein 1 [Source:MGI Symbol;Acc:MGI:1346500]                                                          |  |        | 54,81332951 | -0,3392547 | <b>-1,26510289</b> | 5,77283509 | 6,27496812 | 0,012245532 | 0,042902316  | protein_coding |
| ENSMUSG00000034998  | Foxn2         | forkhead box N2 [Source:MGI Symbol;Acc:MGI:1347478]                                                                                   |  |        | 61,86579316 | -0,3392579 | <b>-1,26510567</b> | 5,9506063  | 6,51441632 | 0,010700344 | 0,038395162  | protein_coding |
| ENSMUSG00000026519  | Tmem63a       | transmembrane protein 63a [Source:MGI Symbol;Acc:MGI:2384789]                                                                         |  |        | 50,93445061 | -0,3393282 | <b>-1,2651673</b>  | 5,66964423 | 6,33008506 | 0,011870662 | 0,041835925  | protein_coding |
| ENSMUSG00000047888  | Tnrc6b        | trinucleotide repeat containing 6b [Source:MGI Symbol;Acc:MGI:2443730]                                                                |  |        | 58,09928723 | -0,3399287 | <b>-1,26569408</b> | 5,85384369 | 6,46367578 | 0,011010166 | 0,039280705  | protein_coding |
| ENSMUSG00000026623  | Lpgat1        | lysophosphatidylglycerol acyltransferase 1 [Source:MGI Symbol;Acc:MGI:2446186]                                                        |  |        | 96,54838129 | -0,3399769 | <b>-1,26573632</b> | 6,59217493 | 6,96277173 | 0,008322301 | 0,031122233  | protein_coding |
| ENSMUSG00000025142  | Aspsr1        | alveolar soft part sarcoma chromosome region, candidate 1 (human) [Source:MGI Symbol;Acc:MGI:1916188]                                 |  |        | 52,97519173 | -0,3401001 | <b>-1,26584443</b> | 5,7237879  | 6,06408217 | 0,013795843 | 0,047043739  | protein_coding |
| ENSMUSG00000024150  | Mcf2d         | multiple coagulation factor deficiency 2 [Source:MGI Symbol;Acc:MGI:2183439]                                                          |  |        | 133,3503812 | -0,3410923 | <b>-1,26671528</b> | 7,05694246 | 6,67841743 | 0,009758723 | 0,035668359  | protein_coding |
| ENSMUSG0000         |               |                                                                                                                                       |  |        |             |            |                    |            |            |             |              |                |

|                     |               |                                                                                                    |        |             |            |             |            |            |              |              |                |
|---------------------|---------------|----------------------------------------------------------------------------------------------------|--------|-------------|------------|-------------|------------|------------|--------------|--------------|----------------|
| ENSMUSG00000020257  | Wdr82         | WD repeat domain containing 82 [Source:MGI Symbol;Acc:MGI:1924555]                                 | Sheet1 | 61,85981302 | -0,344545  | -1,26975048 | 5,94930103 | 6,223026   | 0,012609941  | 0,043801905  | protein_coding |
| ENSMUSG00000036323  | Srp72         | signal recognition particle 72 [Source:MGI Symbol;Acc:MGI:1333795]                                 |        | 184,1442561 | -0,3448715 | -1,27003784 | 7,52509078 | 6,62582741 | 0,010051044  | 0,036566497  | protein_coding |
| ENSMUSG00000030345  | Csnk1g2       | casein kinase 1, gamma 2 [Source:MGI Symbol;Acc:MGI:1920014]                                       |        | 67,25995996 | -0,3450432 | -1,27018905 | 6,06443015 | 5,96068767 | 0,014628344  | 0,04925575   | protein_coding |
| ENSMUSG00000026767  | Fam188a       | family with sequence similarity 188, member A [Source:MGI Symbol;Acc:MGI:1914210]                  |        | 38,20015564 | -0,3452099 | -1,27033558 | 5,25996787 | 6,13083649 | 0,0132844    | 0,045639683  | protein_coding |
| ENSMUSG00000044783  | Hjurp         | Holliday junction recognition protein [Source:MGI Symbol;Acc:MGI:2685821]                          |        | 55,70875188 | -0,3455632 | -1,27064669 | 5,8022167  | 6,51170247 | 0,010716686  | 0,038428273  | protein_coding |
| ENSMUSG00000031662  | Snx20         | sorting nexin 20 [Source:MGI Symbol;Acc:MGI:1918857]                                               |        | 94,47942782 | -0,345658  | -1,27074978 | 6,55973449 | 6,47974462 | 0,010911066  | 0,038991413  | protein_coding |
| ENSMUSG00000071796  | 6820431F20Rik | RIKEN cDNA 6820431F20 gene [Source:MGI Symbol;Acc:MGI:3694236]                                     |        | 55,73565802 | -0,3462228 | -1,27122803 | 5,79757411 | 5,99087489 | 0,014380068  | 0,048628443  | pseudogene     |
| ENSMUSG00000029538  | Srsf9         | serine/arginine-rich splicing factor 9 [Source:MGI Symbol;Acc:MGI:104896]                          |        | 52,70147322 | -0,3472599 | -1,27214219 | 5,7156322  | 5,97408362 | 0,014517623  | 0,048977478  | protein_coding |
| ENSMUSG00000028811  | Yars          | tyrosyl-tRNA synthetase [Source:MGI Symbol;Acc:MGI:2147627]                                        |        | 65,25795919 | -0,3477282 | -1,27255516 | 6,02403073 | 6,67151111 | 0,009796609  | 0,035759251  | protein_coding |
| ENSMUSG00000020271  | Fbxw11        | F-box and WD-40 domain protein 11 [Source:MGI Symbol;Acc:MGI:2144023]                              |        | 168,8678672 | -0,3480129 | -1,27280634 | 7,40018759 | 6,6210509  | 0,010078035  | 0,036604089  | protein_coding |
| ENSMUSG00000024966  | Stip1         | stress-induced phosphoprotein 1 [Source:MGI Symbol;Acc:MGI:109130]                                 |        | 126,7269216 | -0,3484032 | -1,27315072 | 6,98583763 | 6,68113273 | 0,009743869  | 0,035625918  | protein_coding |
| ENSMUSG00000038116  | Phf20         | PHD finger protein 20 [Source:MGI Symbol;Acc:MGI:2444148]                                          |        | 110,2616774 | -0,3487933 | -1,27349501 | 6,78424715 | 7,46794305 | 0,006280727  | 0,02457491   | protein_coding |
| ENSMUSG00000029681  | Bcl7b         | B cell CLL/lymphoma 7B [Source:MGI Symbol;Acc:MGI:1332238]                                         |        | 50,18268526 | -0,3489098 | -1,27359784 | 5,64369819 | 6,04192546 | 0,01397004   | 0,047460985  | protein_coding |
| ENSMUSG00000042613  | Pbxip1        | pre B cell leukemia transcription factor interacting protein 1 [Source:MGI Symbol;Acc:MGI:2441670] |        | 71,71935629 | -0,3489324 | -1,27361784 | 6,15933229 | 6,55369409 | 0,010466663  | 0,037741131  | protein_coding |
| ENSMUSG00000050627  | Gpd1l         | glycerol-3-phosphate dehydrogenase 1-like [Source:MGI Symbol;Acc:MGI:1289257]                      |        | 38,82623615 | -0,3497129 | -1,27430701 | 5,27207588 | 6,05458552 | 0,013870231  | 0,047238755  | protein_coding |
| ENSMUSG00000020802  | Ube2o         | ubiquitin-conjugating enzyme E2O [Source:MGI Symbol;Acc:MGI:2444266]                               |        | 38,66752994 | -0,349914  | -1,27448461 | 5,27529419 | 6,0915197  | 0,013583221  | 0,04643399   | protein_coding |
| ENSMUSG00000034189  | Hsd1l         | hydroxysteroid dehydrogenase like 1 [Source:MGI Symbol;Acc:MGI:1919802]                            |        | 72,88637732 | -0,3499119 | -1,27448904 | 6,18361784 | 7,10539952 | 0,007685209  | 0,029126387  | protein_coding |
| ENSMUSG00000022205  | Sub1          | SUB1 homolog (S. cerevisiae) [Source:MGI Symbol;Acc:MGI:104811]                                    |        | 70,62652206 | -0,3501143 | -1,27466164 | 6,14006883 | 6,68631949 | 0,009715558  | 0,035546067  | protein_coding |
| ENSMUSG00000022973  | Synj1         | synaptotaxin 1 [Source:MGI Symbol;Acc:MGI:1354961]                                                 |        | 222,7059356 | -0,3504086 | -1,27492166 | 7,79878218 | 6,26965511 | 0,01282305   | 0,042948976  | protein_coding |
| ENSMUSG00000004591  | Pkn2          | protein kinase N2 [Source:MGI Symbol;Acc:MGI:109211]                                               |        | 53,45502296 | -0,3505793 | -1,27507252 | 5,74020998 | 6,87114061 | 0,008759872  | 0,032526096  | protein_coding |
| ENSMUSG00000022450  | Ndufa6        | NADH dehydrogenase (ubiquinone) 1 alpha subcomplex, 6 (B14) [Source:MGI Symbol;Acc:MGI:1914380]    |        | 42,72929463 | -0,3507862 | -1,27525542 | 5,41221359 | 6,34877416 | 0,011746244  | 0,041523803  | protein_coding |
| ENSMUSG00000040242  | Fgfr1o2       | FGFR1 oncogene partner 2 [Source:MGI Symbol;Acc:MGI:1914779]                                       |        | 93,92543098 | -0,3510728 | -1,27550879 | 6,65187559 | 7,19281365 | 0,007319612  | 0,025872648  | protein_coding |
| ENSMUSG00000049550  | Clip1         | CAP-GLY domain containing linker protein 1 [Source:MGI Symbol;Acc:MGI:1928401]                     |        | 97,38444579 | -0,3513097 | -1,27571824 | 6,60498899 | 7,58108722 | 0,005898385  | 0,023294594  | protein_coding |
| ENSMUSG00000002458  | Rgs19         | regulator of G-protein signaling 19 [Source:MGI Symbol;Acc:MGI:1915153]                            |        | 86,60956461 | -0,3516951 | -1,27605902 | 6,43317577 | 7,21708323 | 0,0072211295 | 0,027044729  | protein_coding |
| ENSMUSG00000031833  | Mast3         | microtubule associated serine/threonine kinase 3 [Source:MGI Symbol;Acc:MGI:2683541]               |        | 114,3644752 | -0,3517596 | -1,27611611 | 6,83389933 | 6,95206508 | 0,008372253  | 0,031268468  | protein_coding |
| ENSMUSG00000026755  | Arcp5l        | actin related protein 2/3 complex, subunit 5-like [Source:MGI Symbol;Acc:MGI:1921442]              |        | 46,87190239 | -0,3519853 | -1,27631577 | 5,54628069 | 6,17265621 | 0,012973967  | 0,044853674  | protein_coding |
| ENSMUSG00000028420  | Tmem38b       | transmembrane protein 38B [Source:MGI Symbol;Acc:MGI:1098718]                                      |        | 121,3733793 | -0,3531873 | -1,27737196 | 6,92405306 | 7,0254479  | 0,008035937  | 0,030246947  | protein_coding |
| ENSMUSG000000060261 | Gtf2i         | general transcription factor II I [Source:MGI Symbol;Acc:MGI:1202722]                              |        | 172,873719  | -0,3532914 | -1,27747179 | 7,43210984 | 7,19381205 | 0,00731554   | 0,027956815  | protein_coding |
| ENSMUSG00000034786  | Gpsm3         | G-protein signalling modulator 3 (AGS3-like, C. elegans) [Source:MGI Symbol;Acc:MGI:2146755]       |        | 101,8752825 | -0,3547569 | -1,27877005 | 6,66772352 | 7,292769   | 0,006923269  | 0,026668976  | protein_coding |
| ENSMUSG000000031907 | Zfp90         | zinc finger protein 90 [Source:MGI Symbol;Acc:MGI:104786]                                          |        | 26,48657463 | -0,3551048 | -1,27907849 | 4,72244159 | 5,9735838  | 0,014521739  | 0,048977478  | protein_coding |
| ENSMUSG00000031232  | Magt1         | magnesium transporter 1 [Source:MGI Symbol;Acc:MGI:1914325]                                        |        | 88,13599916 | -0,3563889 | -1,28021748 | 6,46064142 | 7,45862206 | 0,006313332  | 0,02467612   | protein_coding |
| ENSMUSG00000039263  | Npep1l        | aminopeptidase-like 1 [Source:MGI Symbol;Acc:MGI:2448523]                                          |        | 82,95183201 | -0,3580288 | -1,28167353 | 6,36788166 | 6,92366049 | 0,008506288  | 0,031713053  | protein_coding |
| ENSMUSG00000029674  | Limk1         | LIM-domain containing, protein kinase [Source:MGI Symbol;Acc:MGI:104572]                           |        | 36,14069684 | -0,3583272 | -1,28193863 | 5,16848363 | 6,5765232  | 0,010333254  | 0,037386216  | protein_coding |
| ENSMUSG00000019843  | Fyn           | Fyn proto-oncogene [Source:MGI Symbol;Acc:MGI:95602]                                               |        | 66,98317278 | -0,3588913 | -1,28243995 | 6,06410854 | 7,20860862 | 0,007255472  | 0,027756222  | protein_coding |
| ENSMUSG00000024687  | Osbp          | oxysterol binding protein [Source:MGI Symbol;Acc:MGI:97447]                                        |        | 70,46325217 | -0,3590486 | -1,28257977 | 6,13794723 | 7,00370125 | 0,008134136  | 0,03054332   | protein_coding |
| ENSMUSG00000042570  | Mier2         | mesoderm induction early response 1, family member 2 [Source:MGI Symbol;Acc:MGI:1917677]           |        | 39,69629776 | -0,3593221 | -1,28282301 | 5,30946557 | 6,05198057 | 0,013890707  | 0,047293834  | protein_coding |
| ENSMUSG00000014418  | Hps5          | Hermansky-Pudlak syndrome 5 homolog (human) [Source:MGI Symbol;Acc:MGI:2180307]                    |        | 71,17609144 | -0,3593245 | -1,28282508 | 6,15290017 | 7,66672939 | 0,005624832  | 0,022383206  | protein_coding |
| ENSMUSG00000022237  | Ankr33b       | ankyrin repeat domain 33B [Source:MGI Symbol;Acc:MGI:1917904]                                      |        | 70,79159152 | -0,3594793 | -1,28296279 | 6,14846059 | 7,58817097 | 0,005875253  | 0,02328284   | protein_coding |
| ENSMUSG00000028101  | Pias3         | protein inhibitor of activated STAT 3 [Source:MGI Symbol;Acc:MGI:1913126]                          |        | 34,40882334 | -0,3601097 | -1,28352346 | 5,09490229 | 6,10589199 | 0,013473193  | 0,046187199  | protein_coding |
| ENSMUSG00000020700  | Map3k3        | mitogen-activated protein kinase kinase kinase 3 [Source:MGI Symbol;Acc:MGI:1346874]               |        | 110,9055815 | -0,3607277 | -1,28407339 | 6,79213783 | 7,19905986 | 0,007294178  | 0,027884877  | protein_coding |
| ENSMUSG00000009995  | Taz           | tafazzin [Source:MGI Symbol;Acc:MGI:109626]                                                        |        | 67,34267814 | -0,3612546 | -1,2845425  | 6,06928256 | 6,62286516 | 0,010067661  | 0,0236578504 | protein_coding |
| ENSMUSG00000042726  | Traf1         | TRAF type zinc finger domain containing 1 [Source:MGI Symbol;Acc:MGI:1923551]                      |        | 170,7113646 | -0,3619324 | -1,28514611 | 7,41422977 | 7,29228173 | 0,006925147  | 0,026668976  | protein_coding |
| ENSMUSG00000021972  | Hmbox1        | homeobox containing 1 [Source:MGI Symbol;Acc:MGI:2445066]                                          |        | 71,58039541 | -0,3629296 | -1,28603469 | 6,15781354 | 7,45174168 | 0,006335151  | 0,024747009  | protein_coding |
| ENSMUSG00000023915  | Tnfrsf21      | tumor necrosis factor receptor superfamily, member 21 [Source:MGI Symbol;Acc:MGI:2151075]          |        | 33,9340438  | -0,3630385 | -1,28613182 | 5,082806   | 6,286635   | 0,01216518   | 0,042661612  | protein_coding |
| ENSMUSG00000029104  | Htt           | huntingtin [Source:MGI Symbol;Acc:MGI:96067]                                                       |        | 181,2720771 | -0,3638635 | -1,2868675  | 7,50151335 | 7,29661505 | 0,006908464  | 0,026623393  | protein_coding |
| ENSMUSG000000068551 | Zfp467        | zinc finger protein 467 [Source:MGI Symbol;Acc:MGI:1916160]                                        |        | 32,49399375 | -0,3639853 | -1,28697614 | 5,0156685  | 6,24463506 | 0,012457005  | 0,043366638  | protein_coding |
| ENSMUSG00000052429  | Prmt1         | protein arginine N-methyltransferase 1 [Source:MGI Symbol;Acc:MGI:107846]                          |        | 74,20884023 | -0,3647314 | -1,28764183 | 6,21278195 | 7,52626351 | 0,006080589  | 0,023897272  | protein_coding |
| ENSMUSG00000057963  | Itpk1         | inositol 1,3,4-triphosphate 5/6 kinase [Source:MGI Symbol;Acc:MGI:2446159]                         |        | 35,52591201 | -0,3649314 | -1,28782043 | 5,14683254 | 6,75619771 | 0,009342262  | 0,034364964  | protein_coding |
| ENSMUSG00000029227  | Fip11         | FIP1 like 1 (S. cerevisiae) [Source:MGI Symbol;Acc:MGI:1914149]                                    |        | 97,63341793 | -0,3650342 | -1,28791212 | 6,61156298 | 8,09770942 | 0,004432123  | 0,018279182  | protein_coding |
| ENSMUSG00000045302  | Preb          | prolactin regulatory element binding [Source:MGI Symbol;Acc:MGI:1355326]                           |        | 113,879691  | -0,3657542 | -1,28855504 | 6,82984487 | 7,43126508 | 0,006410026  | 0,025000695  | protein_coding |
| ENSMUSG00000028059  | Arhgef2       | rho/rac guanine nucleotide exchange factor (GEF) 2 [Source:MGI Symbol;Acc:MGI:103264]              |        | 253,8433453 | -0,3662507 | -1,28899858 | 7,98698749 | 6,43589334 | 0,01118369   | 0,039855725  | protein_coding |
| ENSMUSG00000073131  | Vma21         | VMA21 vacuolar H <sup>+</sup> -ATPase homolog (S. cerevisiae) [Source:MGI Symbol;Acc:MGI:1914298]  |        | 87,27018048 | -0,3663321 | -1,28907131 | 6,45035178 | 7,92722572 | 0,004869641  | 0,019742709  | protein_coding |
| ENSMUSG00000070939  | Tgfbra3       | transforming growth factor, beta receptor associated protein 1 [Source:MGI Symbol;Acc:MGI:2447427] |        | 79,4741242  | -0,3687246 | -1,29121088 | 6,31078182 | 7,59943458 | 0,005838661  | 0,023133562  | protein_coding |
| ENSMUSG00000018846  | Pank3         | panthothenate kinase 3 [Source:MGI Symbol;Acc:MGI:2387464]                                         |        | 80,14642051 | -0,3687499 | -1,29123349 | 6,32159842 | 6,96801756 | 0,008297938  | 0,031052262  | protein_coding |
| ENSMUSG00000027746  | Ufm1          | ubiquitin-fold modifier 1 [Source:MGI Symbol;Acc:MGI:1915140]                                      |        | 63,99619747 | -0,3688555 | -1,29132804 | 6,0002649  | 7,40121861 | 0,006517971  | 0,025349715  | protein_coding |
| ENSMUSG00000033186  | Mzt1          | mitotic spindle organizing protein 1 [Source:MGI Symbol;Acc:MGI:1924039]                           |        | 38,58076769 | -0,3690542 | -1,29150584 | 5,26737272 | 6,9330738  | 0,008461614  | 0,031578721  | protein_coding |
| ENSMUSG00000021537  | Cetn3         | centrin 3 [Source:MGI Symbol;Acc:MGI:1097706]                                                      |        | 30,22540312 | -0,3690815 | -1,29153028 | 4,91242426 | 6,22090967 | 0,012625023  | 0,043840432  | protein_coding |
| ENSMUSG00000027189  | Trim44        | tripartite motif-containing 44 [Source:MGI Symbol;Acc:MGI:1931835]                                 |        | 121,1322321 | -0,3691737 | -1,29161286 | 6,92002501 | 7,86720083 | 0,005033952  | 0,020341313  | protein_coding |
| ENSMUSG00000002319  | Ipo4          | importin 4 [Source:MGI Symbol;Acc:MGI:1923001]                                                     |        | 91,99488876 | -0,369721  | -1,29210295 | 6,5226367  | 8,12964481 | 0,004354728  | 0,018020864  | protein_coding |
| ENSMUSG00000032405  | Pias1         | protein inhibitor of activated STAT 1 [Source:MGI Symbol;Acc:MGI:1913125]                          |        | 84,29540116 | -0,3702566 | -1,29258275 | 6,39581375 | 8,16168134 | 0,004278469  | 0,017924206  | protein_coding |
| ENSMUSG00000031299  | Pdha1         | pyruvate dehydrogenase E1 alpha 1 [Source:MGI Symbol;Acc:MGI:97532]                                |        | 110,2660798 | -0,3706211 | -1,29290935 | 6,78447938 | 7,81811592 | 0,005172509  | 0,020862833  | protein_coding |
| ENSMUSG00000001419  | Mef2d         | myocyte enhancer factor 2D [Source:MGI Symbol;Acc:MGI:99533]                                       |        | 193,1006604 | -0,3709716 | -1,29322344 | 7,59213036 | 7,59490834 | 0,005853337  | 0,0231727    | protein_coding |
| ENSMUSG00000036918  | Ttc7          | tetratricopeptide repeat domain 7 [Source:MGI Symbol;Acc:MGI:1920999]                              |        | 57,88410489 | -0,3718059 | -1,29397155 | 5,84725237 | 8,00655634 | 0,004660829  | 0,019094576  | protein_coding |
| ENSMUSG00000036528  | Pfifb2        | PTPFR interacting protein, binding protein 2 (liprin beta 2) [Source:MGI Symbol;Acc:MGI:894649]    |        | 339,9588565 | -0,3724606 | -1,29455893 | 8,40929111 | 6,10626496 | 0,013470352  | 0,046187199  | protein_coding |
| ENSMUSG00000000838  | Fmr1          | fragile X mental retardation syndrome 1 [Source:MGI Symbol;Acc:MGI:95564]                          |        | 45,07631039 | -0,3727326 | -1,29480298 | 5,48884472 | 7,95541792 | 0,004794364  | 0,019516737  | protein_coding |
| ENSMUSG00000022124  | Fbxl3         | F-box and leucine-rich repeat protein 3 [Source:MGI Symbol;Acc:MGI:1354702]                        |        | 83,16834845 | -0,3738585 | -1,29581382 | 6,37623685 | 8,366863   | 0,003821247  | 0,016185057  | protein_coding |
| ENSMUSG00000021629  | Slc30a5       | solute carrier family 30 (zinc transporter), member 5 [Source:MGI Symbol;Acc:MGI:1916298]          |        | 87,6117725  | -0,3740899 | -1,29602176 | 6,45176407 | 8,37465776 | 0,003804892  | 0,016153149  | protein_coding |
| ENSMUSG00000044600  | 9130011J1     |                                                                                                    |        |             |            |             |            |            |              |              |                |

|                    |               |                                                                                                                                                        |        |             |            |                    |            |             |             |             |                |
|--------------------|---------------|--------------------------------------------------------------------------------------------------------------------------------------------------------|--------|-------------|------------|--------------------|------------|-------------|-------------|-------------|----------------|
| ENSMUSG00000052296 | Ppp6r1        | protein phosphatase 6, regulatory subunit 1 [Source:MGI Symbol;Acc:MGI:2442163]                                                                        | Sheet1 | 180,826663  | -0,3759077 | <b>-1,29765572</b> | 7,49732528 | 7,68905133  | 0,00555682  | 0,022172278 | protein_coding |
| ENSMUSG00000063015 | Ccni          | cyclin I [Source:MGI Symbol;Acc:MGI:1341077]                                                                                                           |        | 216,8015562 | -0,3761602 | <b>-1,29788288</b> | 7,75939454 | 7,29685603  | 0,006907538 | 0,026623393 | protein_coding |
| ENSMUSG00000031403 | Dkc1          | dyserkeratosis congenita 1, dyskerin [Source:MGI Symbol;Acc:MGI:1861727]                                                                               |        | 25,69987234 | -0,3761621 | <b>-1,29788457</b> | 4,69001146 | 6,3190245   | 0,011944932 | 0,024063773 | protein_coding |
| ENSMUSG00000021775 | Nr1d2         | nuclear receptor subfamily 1, group D, member 2 [Source:MGI Symbol;Acc:MGI:2449205]                                                                    |        | 46,09325434 | -0,3764807 | <b>-1,29817123</b> | 5,52318005 | 7,78884017  | 0,005256993 | 0,042119244 | protein_coding |
| ENSMUSG00000030990 | Pgap2         | post-GPI attachment to proteins 2 [Source:MGI Symbol;Acc:MGI:2385286]                                                                                  |        | 198,1697739 | -0,3765372 | <b>-1,29822204</b> | 7,63101621 | 7,02835934  | 0,008022882 | 0,030218515 | protein_coding |
| ENSMUSG00000036438 | Calm2         | calmodulin 2 [Source:MGI Symbol;Acc:MGI:103250]                                                                                                        |        | 353,8296236 | -0,3768853 | <b>-1,29853534</b> | 8,46680402 | 6,04381019  | 0,013955134 | 0,047425011 | protein_coding |
| ENSMUSG00000060005 | Tpr           | translocated promoter region [Source:MGI Symbol;Acc:MGI:1922066]                                                                                       |        | 366,2896839 | -0,3771125 | <b>-1,29873991</b> | 8,51646323 | 6,13870865  | 0,013225386 | 0,045470092 | protein_coding |
| ENSMUSG00000040209 | Zfp704        | zinc finger protein 704 [Source:MGI Symbol;Acc:MGI:2180715]                                                                                            |        | 45,91311945 | -0,3779508 | <b>-1,29949447</b> | 5,51288127 | 7,74672476  | 0,005381004 | 0,021561304 | protein_coding |
| ENSMUSG00000038658 | C030046E11Rik | RIKEN cDNA C030046E11 gene [Source:MGI Symbol;Acc:MGI:1924893]                                                                                         |        | 123,1301908 | -0,3782526 | <b>-1,29976664</b> | 6,94423194 | 7,64898331  | 0,005680433 | 0,025663598 | protein_coding |
| ENSMUSG00000062908 | Acadm         | acyl-Coenzyme A dehydrogenase, medium chain [Source:MGI Symbol;Acc:MGI:87867]                                                                          |        | 61,2566138  | -0,3784713 | <b>-1,2999637</b>  | 5,93571951 | 7,81335796  | 0,005186145 | 0,020902485 | protein_coding |
| ENSMUSG00000031223 | Lipe          | lipase, hormone sensitive [Source:MGI Symbol;Acc:MGI:96790]                                                                                            |        | 38,27729017 | -0,3794459 | <b>-1,30084214</b> | 5,25113994 | 6,520166402 | 0,010665817 | 0,038352705 | protein_coding |
| ENSMUSG00000037089 | Slc35b2       | solute carrier family 35, member B2 [Source:MGI Symbol;Acc:MGI:1921086]                                                                                |        | 67,16758438 | -0,380429  | <b>-1,30172891</b> | 6,06528168 | 7,67053823  | 0,005612971 | 0,022368413 | protein_coding |
| ENSMUSG00000016344 | Pdpf1         | pancreatic progenitor cell differentiation and proliferation factor homolog (zebrafish)/RIKEN cDNA 2700038C09 gene [Source:MGI Symbol;Acc:MGI:1344345] |        | 29,15796985 | -0,3805039 | <b>-1,30179644</b> | 4,85764497 | 6,2423108   | 0,012473363 | 0,04340983  | protein_coding |
| ENSMUSG00000041133 | Smc1a         | structural maintenance of chromosomes 1A [Source:MGI Symbol;Acc:MGI:1344345]                                                                           |        | 91,21000879 | -0,3809518 | <b>-1,30220064</b> | 6,50912757 | 8,54618737  | 0,003462467 | 0,014947789 | protein_coding |
| ENSMUSG00000022329 | Stk3          | serine/threonine kinase 3 [Source:MGI Symbol;Acc:MGI:1928487]                                                                                          |        | 30,78642493 | -0,3817427 | <b>-1,30291478</b> | 4,94892518 | 7,06205203  | 0,007873376 | 0,029777895 | protein_coding |
| ENSMUSG00000029860 | Zyx           | zyxin [Source:MGI Symbol;Acc:MGI:103072]                                                                                                               |        | 174,591984  | -0,3821837 | <b>-1,3033131</b>  | 7,44556924 | 7,76206337  | 0,005335497 | 0,021418016 | protein_coding |
| ENSMUSG00000053436 | Mapk14        | mitogen-activated protein kinase 14 [Source:MGI Symbol;Acc:MGI:1346865]                                                                                |        | 149,5522987 | -0,3825255 | <b>-1,30362189</b> | 7,22354467 | 8,02494919  | 0,004613732 | 0,018949934 | protein_coding |
| ENSMUSG00000031805 | Jak3          | Janus kinase 3 [Source:MGI Symbol;Acc:MGI:99928]                                                                                                       |        | 40,8127667  | -0,3826695 | <b>-1,30375206</b> | 5,34188327 | 6,44293371  | 0,011139453 | 0,039710958 | protein_coding |
| ENSMUSG00000042178 | Arcm5         | armadillo repeat containing 5 [Source:MGI Symbol;Acc:MGI:2384586]                                                                                      |        | 50,93972213 | -0,3830025 | <b>-1,30405296</b> | 5,66034198 | 6,80078911  | 0,009411759 | 0,033650722 | protein_coding |
| ENSMUSG00000033128 | Gga1          | golgi associated, gamma adaptin ear containing, ARF binding protein 1 [Source:MGI Symbol;Acc:MGI:2146207]                                              |        | 151,7447018 | -0,383161  | <b>-1,30419631</b> | 7,24327843 | 8,11004914  | 0,004402053 | 0,018175633 | protein_coding |
| ENSMUSG00000020091 | Eif4ebp2      | eukaryotic translation initiation factor 4E binding protein 2 [Source:MGI Symbol;Acc:MGI:109198]                                                       |        | 43,82822696 | -0,3833195 | <b>-1,30433959</b> | 5,44669591 | 7,01662499  | 0,008075631 | 0,030354757 | protein_coding |
| ENSMUSG00000024165 | Hn1f1         | hematological and neurological expressed 1-like [Source:MGI Symbol;Acc:MGI:1196260]                                                                    |        | 62,64300542 | -0,3847011 | <b>-1,30558923</b> | 5,97152253 | 8,28510856  | 0,003997151 | 0,016813439 | protein_coding |
| ENSMUSG00000030347 | D6Wsu163e     | DNA segment, Chr 6, Wayne State University 163, expressed [Source:MGI Symbol;Acc:MGI:107893]                                                           |        | 42,93813666 | -0,3849597 | <b>-1,30582336</b> | 5,42461733 | 7,54211179  | 0,006027336 | 0,023727101 | protein_coding |
| ENSMUSG00000060657 | Marf1         | meiosis arrest female 1 [Source:MGI Symbol;Acc:MGI:2444505]                                                                                            |        | 135,9434096 | -0,3855506 | <b>-1,30635822</b> | 7,08569777 | 8,60477046  | 0,003352836 | 0,014520146 | protein_coding |
| ENSMUSG00000049751 | Rpl36al       | ribosomal protein L36A-like [Source:MGI Symbol;Acc:MGI:1913733]                                                                                        |        | 152,1534317 | -0,3861599 | <b>-1,30691011</b> | 7,24824057 | 7,79084606  | 0,00525116  | 0,021133515 | protein_coding |
| ENSMUSG00000023277 | Twf2          | twinfilin, actin-binding protein, homolog 2 (Drosophila) [Source:MGI Symbol;Acc:MGI:1346078]                                                           |        | 104,8964876 | -0,3864914 | <b>-1,30721043</b> | 6,7072958  | 7,0220656   | 0,00805113  | 0,030283384 | protein_coding |
| ENSMUSG00000023272 | Creld2        | cysteine-rich with EGF-like domains 2 [Source:MGI Symbol;Acc:MGI:1923987]                                                                              |        | 27,66627756 | -0,3866117 | <b>-1,30731943</b> | 4,78671218 | 6,30719749  | 0,01024877  | 0,042264019 | protein_coding |
| ENSMUSG00000013787 | Ehmt2         | chromatin histone lysine N-methyltransferase 2 [Source:MGI Symbol;Acc:MGI:2148922]                                                                     |        | 231,3380285 | -0,3886392 | <b>-1,30915802</b> | 7,85251744 | 7,00484818  | 0,008128927 | 0,030534194 | protein_coding |
| ENSMUSG00000024818 | Slc25a45      | solute carrier family 25, member 45 [Source:MGI Symbol;Acc:MGI:2147731]                                                                                |        | 132,8860606 | -0,3887133 | <b>-1,30922522</b> | 7,05174356 | 8,27231116  | 0,00401453  | 0,016860719 | protein_coding |
| ENSMUSG00000026094 | Stk17b        | serine/threonine kinase 17b (apoptosis-inducing) [Source:MGI Symbol;Acc:MGI:2138162]                                                                   |        | 138,955188  | -0,3891118 | <b>-1,30958692</b> | 7,12025687 | 8,85381518  | 0,002942769 | 0,012931363 | protein_coding |
| ENSMUSG00000031865 | Dctn1         | dynactin 1 [Source:MGI Symbol;Acc:MGI:107745]                                                                                                          |        | 170,1723772 | -0,3903067 | <b>-1,310672</b>   | 7,40925379 | 8,63795214  | 0,003292313 | 0,014303141 | protein_coding |
| ENSMUSG00000035397 | Klf16         | Kruppel-like factor 16 [Source:MGI Symbol;Acc:MGI:2153049]                                                                                             |        | 27,40248996 | -0,3904463 | <b>-1,31079888</b> | 4,77196545 | 6,67660334  | 0,00976866  | 0,035692806 | protein_coding |
| ENSMUSG00000014606 | Slc25a11      | solute carrier family 25 (mitochondrial carrier oxoglutarate carrier), member 11 [Source:MGI Symbol;Acc:MGI:1915113]                                   |        | 120,7224009 | -0,3916122 | <b>-1,31185857</b> | 6,91370439 | 9,12449947  | 0,002522089 | 0,011391162 | protein_coding |
| ENSMUSG00000030399 | Ppp5c         | protein phosphatase 5, catalytic subunit [Source:MGI Symbol;Acc:MGI:102666]                                                                            |        | 92,23080436 | -0,3917335 | <b>-1,31196887</b> | 6,52536935 | 8,92462048  | 0,002813518 | 0,01251503  | protein_coding |
| ENSMUSG00000018428 | Akap1         | A kinase (PRKA) anchor protein 1 [Source:MGI Symbol;Acc:MGI:104729]                                                                                    |        | 28,80223485 | -0,3920525 | <b>-1,31225902</b> | 4,50956193 | 6,26207093  | 0,012334993 | 0,043092073 | protein_coding |
| ENSMUSG00000030291 | Med21         | mediator complex subunit 21 [Source:MGI Symbol;Acc:MGI:1347064]                                                                                        |        | 28,38515642 | -0,3920732 | <b>-1,31227782</b> | 4,82923498 | 6,51806638  | 0,010678404 | 0,03836613  | protein_coding |
| ENSMUSG00000020743 | Mif4g         | MIF4G domain containing [Source:MGI Symbol;Acc:MGI:1916924]                                                                                            |        | 36,5907843  | -0,3920777 | <b>-1,31228195</b> | 5,18662658 | 7,70704219  | 0,005500581 | 0,021992315 | protein_coding |
| ENSMUSG00000040459 | Argl1         | arginine and glutamate rich 1 [Source:MGI Symbol;Acc:MGI:2442985]                                                                                      |        | 49,22280192 | -0,3923834 | <b>-1,31256002</b> | 5,61712932 | 8,32531055  | 0,001399645 | 0,016489549 | protein_coding |
| ENSMUSG00000029192 | Tbc1d14       | TBC1 domain family, member 14 [Source:MGI Symbol;Acc:MGI:1098708]                                                                                      |        | 109,5931086 | -0,3924057 | <b>-1,31258032</b> | 6,77447702 | 8,16767406  | 0,004264356 | 0,01774043  | protein_coding |
| ENSMUSG00000033697 | Arhgap39      | Rho GTPase activating protein 39 [Source:MGI Symbol;Acc:MGI:107858]                                                                                    |        | 27,04001927 | -0,3927034 | <b>-1,31285123</b> | 4,7427336  | 6,96875277  | 0,008294529 | 0,031050082 | protein_coding |
| ENSMUSG00000061288 | Tao3          | TAO kinase 3 [Source:MGI Symbol;Acc:MGI:3041177]                                                                                                       |        | 221,0622508 | -0,3935829 | <b>-1,31365182</b> | 7,78770942 | 7,96999164  | 0,004755916 | 0,019398364 | protein_coding |
| ENSMUSG00000036241 | Ube2r1        | ubiquitin-conjugating enzyme E2R 2 [Source:MGI Symbol;Acc:MGI:1914865]                                                                                 |        | 128,6277819 | -0,3936196 | <b>-1,31368516</b> | 7,00613508 | 8,61274805  | 0,003338183 | 0,014473801 | protein_coding |
| ENSMUSG00000021794 | Glud1         | glutamate dehydrogenase 1 [Source:MGI Symbol;Acc:MGI:95753]                                                                                            |        | 368,0148096 | -0,3940133 | <b>-1,31404373</b> | 8,52345332 | 6,56366937  | 0,010408153 | 0,037567141 | protein_coding |
| ENSMUSG00000090137 | Uba52         | ubiquitin A-52 residue ribosomal protein fusion product 4 [Source:MGI Symbol;Acc:MGI:98887]                                                            |        | 190,4662688 | -0,3948066 | <b>-1,31476654</b> | 7,57074895 | 8,45427705  | 0,00364186  | 0,015593575 | protein_coding |
| ENSMUSG00000031681 | Smad1         | SMAD family member 1 [Source:MGI Symbol;Acc:MGI:109452]                                                                                                |        | 25,52997566 | -0,3949526 | <b>-1,31489953</b> | 5,14044589 | 7,02256015  | 0,008048907 | 0,030283384 | protein_coding |
| ENSMUSG00000031198 | Fundc2        | FUN14 domain containing 2 [Source:MGI Symbol;Acc:MGI:1914641]                                                                                          |        | 43,89768913 | -0,3950053 | <b>-1,3149476</b>  | 4,54647424 | 8,57437327  | 0,00340086  | 0,017421025 | protein_coding |
| ENSMUSG0000001964  | Emd           | emerin [Source:MGI Symbol;Acc:MGI:108117]                                                                                                              |        | 45,17241832 | -0,3950304 | <b>-1,31497044</b> | 5,49847626 | 8,15387665  | 0,004296921 | 0,017848873 | protein_coding |
| ENSMUSG00000075415 | Fnbp1         | formin binding protein 1 [Source:MGI Symbol;Acc:MGI:109606]                                                                                            |        | 279,8735972 | -0,3951343 | <b>-1,31506515</b> | 8,12818092 | 7,38976257  | 0,006559615 | 0,025484613 | protein_coding |
| ENSMUSG00000047123 | Ticam1        | toll-like receptor adaptor molecule 1 [Source:MGI Symbol;Acc:MGI:2147032]                                                                              |        | 68,47108165 | -0,3958389 | <b>-1,31570761</b> | 6,09645708 | 8,69618255  | 0,003188772 | 0,013891766 | protein_coding |
| ENSMUSG00000020941 | Map3k14       | mitogen-activated protein kinase kinase kinase 14 [Source:MGI Symbol;Acc:MGI:1858204]                                                                  |        | 47,54409372 | -0,3959366 | <b>-1,31579669</b> | 5,56624343 | 7,80594827  | 0,005207453 | 0,02097298  | protein_coding |
| ENSMUSG00000025648 | Pfkfb4        | 6-phosphofructo-2-kinase/fructose-2,6-bisphosphatase 4 [Source:MGI Symbol;Acc:MGI:2687284]                                                             |        | 42,74928657 | -0,3962193 | <b>-1,31605454</b> | 5,41023352 | 6,48842543  | 0,01085791  | 0,03883329  | protein_coding |
| ENSMUSG00000036054 | Supg2         | SURP and G patch domain containing 2 [Source:MGI Symbol;Acc:MGI:2678085]                                                                               |        | 44,22138711 | -0,3964001 | <b>-1,31621948</b> | 5,46160592 | 7,70412103  | 0,005509489 | 0,02201265  | protein_coding |
| ENSMUSG00000000628 | Hk2           | hexokinase 2 [Source:MGI Symbol;Acc:MGI:1315197]                                                                                                       |        | 154,5144169 | -0,3964006 | <b>-1,31621991</b> | 7,27150574 | 8,47149573  | 0,003607547 | 0,015452677 | protein_coding |
| ENSMUSG00000028282 | Casp8ap2      | caspase 8 associated protein 2 [Source:MGI Symbol;Acc:MGI:1349399]                                                                                     |        | 27,49637813 | -0,3968929 | <b>-1,31666918</b> | 4,76885201 | 7,52738011  | 0,006076822 | 0,02389622  | protein_coding |
| ENSMUSG00000027466 | Rbck1         | RanBP-type and C3HC4-type zinc finger containing 1 [Source:MGI Symbol;Acc:MGI:1344372]                                                                 |        | 72,1664888  | -0,3969614 | <b>-1,31673172</b> | 6,16678374 | 7,46346648  | 0,006296364 | 0,024627325 | protein_coding |
| ENSMUSG00000057530 | Ece1          | endothelin converting enzyme 1 [Source:MGI Symbol;Acc:MGI:1101357]                                                                                     |        | 59,98323502 | -0,3979033 | <b>-1,31759168</b> | 5,90408086 | 8,73998626  | 0,003113069 | 0,013654006 | protein_coding |
| ENSMUSG00000059555 | A830007P12Rik | RIKEN cDNA A830007P12 gene [Source:MGI Symbol;Acc:MGI:2442720]                                                                                         |        | 151,7641403 | -0,3982703 | <b>-1,31792688</b> | 7,24328588 | 8,25684366  | 0,004059865 | 0,017025092 | protein_coding |
| ENSMUSG00000040327 | Cul9          | cullin 9 [Source:MGI Symbol;Acc:MGI:1925559]                                                                                                           |        | 60,4606281  | -0,3983132 | <b>-1,31796603</b> | 5,90916316 | 9,07883517  | 0,002558547 | 0,01164373  | protein_coding |
| ENSMUSG00000049988 | Lrrc25        | leucine rich repeat containing 25 [Source:MGI Symbol;Acc:MGI:2445284]                                                                                  |        | 272,5559531 | -0,3985441 | <b>-1,31817704</b> | 8,08968715 | 6,86601277  | 0,008785044 | 0,032586524 | protein_coding |
| ENSMUSG00000073982 | Rhog          | ras homolog gene family, member G [Source:MGI Symbol;Acc:MGI:1928370]                                                                                  |        | 363,7892053 | -0,3986331 | <b>-1,31825831</b> | 8,50651625 | 6,29401515  | 0,012114631 | 0,042511482 | protein_coding |
| ENSMUSG00000058997 | Vva8          | von Willebrand factor A domain containing 8 [Source:MGI Symbol;Acc:MGI:1919008]                                                                        |        | 95,5029769  | -0,3992326 | <b>-1,3188093</b>  | 6,57750796 | 9,49471816  | 0,002060642 | 0,009617377 | protein_coding |
| ENSMUSG00000040760 | App1          | adaptor protein, phosphotyrosine interaction, PH domain and leucine zipper containing 1 [Source:MGI Symbol;Acc                                         |        |             |            |                    |            |             |             |             |                |

|                    |             |                                                                                                 |             |            |                    |            |            |             |             |                |
|--------------------|-------------|-------------------------------------------------------------------------------------------------|-------------|------------|--------------------|------------|------------|-------------|-------------|----------------|
| ENSMUSG00000023007 | Prpf40b     | PRP40 pre-mRNA processing factor 40 homolog B (yeast) [Source:MGI Symbol;Acc:MGI:1925583]h3e1t  | 18,25895292 | -0,4042963 | <b>-1,32344321</b> | 4,18171953 | 6,12190593 | 0,013351677 | 0,045856478 | protein_coding |
| ENSMUSG00000027363 | Usp8        | ubiquitin specific peptidase 8 [Source:MGI Symbol;Acc:MGI:1934029]                              | 241,7937245 | -0,4043587 | <b>-1,32350042</b> | 7,91734496 | 8,18228165 | 0,004230152 | 0,017604803 | protein_coding |
| ENSMUSG00000022336 | Eif3e       | eukaryotic translation initiation factor 3, subunit E [Source:MGI Symbol;Acc:MGI:99257]         | 169,4797503 | -0,4046009 | <b>-1,32372263</b> | 7,40459835 | 9,12755657 | 0,002517588 | 0,011384331 | protein_coding |
| ENSMUSG00000054920 | Kih15       | kelch-like 5 (Drosophila) [Source:MGI Symbol;Acc:MGI:1919028]                                   | 114,1934196 | -0,4046035 | <b>-1,32372505</b> | 6,83337539 | 9,53109889 | 0,002020191 | 0,010494906 | protein_coding |
| ENSMUSG00000039853 | Trim14      | tripartite motif-containing 14 [Source:MGI Symbol;Acc:MGI:1921985]                              | 44,71897625 | -0,4057315 | <b>-1,32476047</b> | 5,47355832 | 8,73439078 | 0,003122636 | 0,013685044 | protein_coding |
| ENSMUSG00000042626 | Shc1        | src homology 2 domain-containing transforming protein C1 [Source:MGI Symbol;Acc:MGI:98296]      | 104,9303302 | -0,4059381 | <b>-1,32495017</b> | 6,71091129 | 8,42954431 | 0,003691729 | 0,01577636  | protein_coding |
| ENSMUSG00000036257 | Pnpla8      | patatin-like phospholipase domain containing 8 [Source:MGI Symbol;Acc:MGI:1914702]              | 54,7689764  | -0,4061143 | <b>-1,32511203</b> | 5,77788227 | 9,39433791 | 0,002176566 | 0,01008601  | protein_coding |
| ENSMUSG00000030760 | Acer3       | alkaline ceramidase 3 [Source:MGI Symbol;Acc:MGI:1913440]                                       | 31,6261066  | -0,4062288 | <b>-1,32521716</b> | 4,98516836 | 8,00333044 | 0,004669139 | 0,019098182 | protein_coding |
| ENSMUSG00000027854 | Stk1e       | suppressor of IKBKE 1 [Source:MGI Symbol;Acc:MGI:1913891]                                       | 44,56379604 | -0,4062526 | <b>-1,32523902</b> | 5,47569349 | 8,47171321 | 0,003607115 | 0,015452677 | protein_coding |
| ENSMUSG00000025375 | Aatk        | apoptosis-associated tyrosine kinase [Source:MGI Symbol;Acc:MGI:1197518]                        | 24,56188993 | -0,4064034 | <b>-1,32537753</b> | 4,60320684 | 6,82427236 | 0,008990428 | 0,033292158 | protein_coding |
| ENSMUSG00000051864 | Tbc1d22a    | TBC1 domain family, member 22a [Source:MGI Symbol;Acc:MGI:1289265]                              | 100,6624729 | -0,4065304 | <b>-1,32549428</b> | 6,64930415 | 9,95486346 | 0,00160425  | 0,007757877 | protein_coding |
| ENSMUSG00000054428 | Atp1f1      | ATPase inhibitory factor 1 [Source:MGI Symbol;Acc:MGI:1196457]                                  | 92,14933815 | -0,4065523 | <b>-1,32551435</b> | 6,52383577 | 9,92487445 | 0,00163606  | 0,007871441 | protein_coding |
| ENSMUSG00000028708 | Mknk1       | MAP kinase-interacting serine/threonine kinase 1 [Source:MGI Symbol;Acc:MGI:894316]             | 77,20399946 | -0,4066334 | <b>-1,32558886</b> | 6,26968912 | 8,58278908 | 0,003393552 | 0,014667656 | protein_coding |
| ENSMUSG00000059436 | Max         | Max protein [Source:MGI Symbol;Acc:MGI:96921]                                                   | 82,00858345 | -0,4069043 | <b>-1,32583378</b> | 6,35470356 | 9,6801602  | 0,001862694 | 0,008828864 | protein_coding |
| ENSMUSG00000033454 | Zbtb1       | zinc finger and BTB domain containing 1 [Source:MGI Symbol;Acc:MGI:2442326]                     | 52,40360191 | -0,4070504 | <b>-1,3259721</b>  | 5,70737834 | 8,66071962 | 0,003251429 | 0,014142299 | protein_coding |
| ENSMUSG00000057229 | Atp5f1      | ATP5S-like [Source:MGI Symbol;Acc:MGI:1913599]                                                  | 20,96126284 | -0,4074796 | <b>-1,32636665</b> | 4,37448996 | 6,58605488 | 0,010278069 | 0,037256729 | protein_coding |
| ENSMUSG00000029723 | Tsc22d4     | TSC22 domain family, member 4 [Source:MGI Symbol;Acc:MGI:1926079]                               | 145,5111627 | -0,4075686 | <b>-1,32644842</b> | 7,18250927 | 9,42157875 | 0,002144468 | 0,009962428 | protein_coding |
| ENSMUSG00000025223 | Ldb1        | LIM domain binding 1 [Source:MGI Symbol;Acc:MGI:894762]                                         | 95,1703143  | -0,4079767 | <b>-1,32682371</b> | 6,56844374 | 9,82819844 | 0,001718566 | 0,008257895 | protein_coding |
| ENSMUSG00000016933 | Plcg1       | phospholipase C, gamma 1 [Source:MGI Symbol;Acc:MGI:97615]                                      | 24,97846408 | -0,408132  | <b>-1,32696656</b> | 4,64088855 | 7,30662528 | 0,006870083 | 0,026521996 | protein_coding |
| ENSMUSG00000020272 | Stk10       | serine/threonine kinase 10 [Source:MGI Symbol;Acc:MGI:1099439]                                  | 58,04614149 | -0,4082665 | <b>-1,32709024</b> | 5,85164059 | 8,79270563 | 0,003024374 | 0,013318154 | protein_coding |
| ENSMUSG00000022159 | Rab2b       | RAB2B, member RAS oncogene family [Source:MGI Symbol;Acc:MGI:1923588]                           | 23,65170982 | -0,4083256 | <b>-1,32714467</b> | 4,55616865 | 5,98972188 | 0,014389471 | 0,048645267 | protein_coding |
| ENSMUSG00000032299 | Comm2d      | COMM domain containing 4 [Source:MGI Symbol;Acc:MGI:1913449]                                    | 31,00951475 | -0,4084729 | <b>-1,32728016</b> | 4,949405   | 7,49888052 | 0,006173736 | 0,024202212 | protein_coding |
| ENSMUSG00000037013 | Ss18        | synovial sarcoma translocation, Chromosome 18 [Source:MGI Symbol;Acc:MGI:107708]                | 67,35283417 | -0,4090716 | <b>-1,32783106</b> | 6,07351674 | 9,90896759 | 0,001644754 | 0,007932795 | protein_coding |
| ENSMUSG00000040945 | Rcc2        | regulator of chromosome condensation 2 [Source:MGI Symbol;Acc:MGI:1919784]                      | 202,5271949 | -0,4093553 | <b>-1,32809215</b> | 7,66052859 | 8,68651547 | 0,003205729 | 0,013960105 | protein_coding |
| ENSMUSG00000024663 | Rab31l1     | RAB3A interacting protein (rab33)-like 1 [Source:MGI Symbol;Acc:MGI:1922010]                    | 193,1042331 | -0,4094384 | <b>-1,32816873</b> | 7,59922689 | 8,13210372 | 0,004348826 | 0,010303222 | protein_coding |
| ENSMUSG00000029142 | Mrp133      | mitochondrial ribosomal protein L33 [Source:MGI Symbol;Acc:MGI:2137225]                         | 30,66283384 | -0,4104619 | <b>-1,32911124</b> | 4,93451444 | 8,18403559 | 0,004226064 | 0,017594454 | protein_coding |
| ENSMUSG00000007880 | Arid1a      | AT rich interactive domain 1A (SWI-like) [Source:MGI Symbol;Acc:MGI:1935147]                    | 218,8147433 | -0,4110969 | <b>-1,32969646</b> | 7,77300064 | 8,40227227 | 0,003747523 | 0,015977506 | protein_coding |
| ENSMUSG00000045410 | Akr1e1      | aldo-keto reductase family 1, member E1 [Source:MGI Symbol;Acc:MGI:1914758]                     | 43,65784052 | -0,4111205 | <b>-1,32971812</b> | 5,4494195  | 8,97454173 | 0,002737672 | 0,015217224 | protein_coding |
| ENSMUSG00000073491 | Pydc4       | pyrin domain containing 4 [Source:MGI Symbol;Acc:MGI:3695276]                                   | 19,22798444 | -0,4116822 | <b>-1,33023577</b> | 4,27096847 | 6,5763589  | 0,010334207 | 0,037386216 | protein_coding |
| ENSMUSG00000021785 | Ngly1       | N-glycanase 1 [Source:MGI Symbol;Acc:MGI:1913276]                                               | 27,17700714 | -0,4118272 | <b>-1,3303697</b>  | 4,76278147 | 6,96414586 | 0,008315912 | 0,031108929 | protein_coding |
| ENSMUSG00000037573 | Tob1        | transducer of ErbB-2.1 [Source:MGI Symbol;Acc:MGI:1349721]                                      | 29,24031264 | -0,4118924 | <b>-1,33042978</b> | 4,86313416 | 8,11516423 | 0,00438965  | 0,018131233 | protein_coding |
| ENSMUSG00000003423 | Phi1d1      | PIH1 domain containing 1 [Source:MGI Symbol;Acc:MGI:1916095]                                    | 36,16687186 | -0,4121714 | <b>-1,33068708</b> | 5,17036487 | 6,86832666 | 0,008773677 | 0,032555348 | protein_coding |
| ENSMUSG00000055720 | Ubl7        | ubiquitin-like 7 (bone marrow stromal cell-derived) [Source:MGI Symbol;Acc:MGI:1916709]         | 52,36271798 | -0,4139565 | <b>-1,33233466</b> | 5,70554424 | 8,71321499 | 0,003159116 | 0,013788604 | protein_coding |
| ENSMUSG00000040651 | D14Abb1e    | DNA segment, Chr 14, Abbott 1 expressed [Source:MGI Symbol;Acc:MGI:1921694]                     | 42,89133097 | -0,4142024 | <b>-1,33256324</b> | 5,41762129 | 7,64292093 | 0,005699555 | 0,022631373 | protein_coding |
| ENSMUSG00000025040 | Fundc1      | FUN14 domain containing 1 [Source:MGI Symbol;Acc:MGI:1919268]                                   | 41,57366115 | -0,4142246 | <b>-1,33258229</b> | 5,37210828 | 8,71312651 | 0,003159269 | 0,013788604 | protein_coding |
| ENSMUSG00000047676 | Rpsa-ps10   | ribosomal protein SA, pseudogene 10 [Source:MGI Symbol;Acc:MGI:3704228]                         | 132,9633068 | -0,4143394 | <b>-1,33268827</b> | 7,05701188 | 7,62346368 | 0,005761373 | 0,022843812 | protein_coding |
| ENSMUSG00000021427 | Ssr1        | signal sequence receptor, alpha [Source:MGI Symbol;Acc:MGI:105082]                              | 156,3062375 | -0,4145412 | <b>-1,33287472</b> | 7,28775753 | 9,26753736 | 0,002332511 | 0,010686947 | protein_coding |
| ENSMUSG00000061758 | Akr1b10     | aldo-keto reductase family 1, member B10 (aldose reductase) [Source:MGI Symbol;Acc:MGI:1915111] | 50,9239701  | -0,4146903 | <b>-1,33301247</b> | 5,67060674 | 9,48863423 | 0,002067487 | 0,009637453 | protein_coding |
| ENSMUSG00000040410 | Fbx4        | F-box and leucine-rich repeat protein 4 [Source:MGI Symbol;Acc:MGI:2140367]                     | 19,50445402 | -0,414806  | <b>-1,33311943</b> | 4,2752907  | 6,25549998 | 0,01238083  | 0,043156148 | protein_coding |
| ENSMUSG00000038502 | Ptov1       | prostate tumor over expressed gene 1 [Source:MGI Symbol;Acc:MGI:1933946]                        | 75,28013324 | -0,4155234 | <b>-1,3337825</b>  | 6,22927713 | 9,04164714 | 0,002638978 | 0,011848977 | protein_coding |
| ENSMUSG00000039879 | Heca        | headcase homolog (Drosophila) [Source:MGI Symbol;Acc:MGI:2685715]                               | 35,03650577 | -0,415628  | <b>-1,33381894</b> | 5,13400845 | 7,7491983  | 0,005373639 | 0,021539647 | protein_coding |
| ENSMUSG00000042548 | Asx1l       | additional sex combs like 1 [Source:MGI Symbol;Acc:MGI:2684063]                                 | 116,7503884 | -0,4157152 | <b>-1,33395985</b> | 6,86694532 | 9,66072384 | 0,001882494 | 0,008899727 | protein_coding |
| ENSMUSG00000020575 | Nbas        | neuroblastoma amplified sequence [Source:MGI Symbol;Acc:MGI:1918419]                            | 26,04267873 | -0,4165188 | <b>-1,33470307</b> | 4,70202704 | 8,00605605 | 0,004662117 | 0,019094576 | protein_coding |
| ENSMUSG00000026277 | Stk25       | serine/threonine kinase 25 (yeast) [Source:MGI Symbol;Acc:MGI:1891699]                          | 72,24536159 | -0,4168285 | <b>-1,3349896</b>  | 6,17254027 | 8,89231771 | 0,00286373  | 0,012702382 | protein_coding |
| ENSMUSG00000006299 | Aamp        | angio-associated migratory protein [Source:MGI Symbol;Acc:MGI:107809]                           | 179,5883986 | -0,4170211 | <b>-1,33516783</b> | 7,48703855 | 9,04931393 | 0,002627934 | 0,011809044 | protein_coding |
| ENSMUSG00000020640 | Itsn2       | intersectin 2 [Source:MGI Symbol;Acc:MGI:1338049]                                               | 178,3687193 | -0,417277  | <b>-1,33540466</b> | 7,47871046 | 9,6624034  | 0,001880774 | 0,008895422 | protein_coding |
| ENSMUSG00000061331 | Gm17132     | predicted gene 17132 [Source:MGI Symbol;Acc:MGI:4937959]                                        | 31,93929853 | -0,4175145 | <b>-1,33562453</b> | 4,98664695 | 7,41574863 | 0,006465541 | 0,025181459 | pseudogene     |
| ENSMUSG00000025937 | Lactb2      | lactamase, beta 2 [Source:MGI Symbol;Acc:MGI:2442551]                                           | 51,19152195 | -0,4178154 | <b>-1,33590311</b> | 5,67145017 | 7,96348468 | 0,004773043 | 0,019444356 | protein_coding |
| ENSMUSG00000003746 | Man1a       | mannosidase 1, alpha [Source:MGI Symbol;Acc:MGI:104677]                                         | 140,1181358 | -0,4178544 | <b>-1,33593925</b> | 7,12788358 | 10,1171013 | 0,001468999 | 0,007170096 | protein_coding |
| ENSMUSG00000014426 | Map3k4      | mitogen-activated protein kinase kinase 4 [Source:MGI Symbol;Acc:MGI:1346875]                   | 28,70694267 | -0,4181084 | <b>-1,33617449</b> | 4,8396266  | 7,51185173 | 0,006129432 | 0,024051455 | protein_coding |
| ENSMUSG00000027108 | Ola1        | Obg-like ATPase 1 [Source:MGI Symbol;Acc:MGI:1914309]                                           | 73,58860328 | -0,418152  | <b>-1,33621487</b> | 6,20087531 | 10,6375293 | 0,001108156 | 0,005605577 | protein_coding |
| ENSMUSG00000036622 | Atp13a2     | ATPase type 13A2 [Source:MGI Symbol;Acc:MGI:1922022]                                            | 538,308573  | -0,4181996 | <b>-1,33625898</b> | 9,071598   | 6,03395088 | 0,014033289 | 0,047646397 | protein_coding |
| ENSMUSG00000085438 | 170002014Rk | Riken cDNA 170002014 gene [Source:MGI Symbol;Acc:MGI:1913852]                                   | 107,4395342 | -0,4184402 | <b>-1,33648182</b> | 6,74343482 | 10,09043   | 0,001490413 | 0,007258497 | lincRNA        |
| ENSMUSG00000050628 | Fam01100b   | family with sequence similarity 100, member B [Source:MGI Symbol;Acc:MGI:1914635]               | 30,16792146 | -0,4191799 | <b>-1,33716723</b> | 4,92046507 | 7,40149654 | 0,006516964 | 0,025349715 | protein_coding |
| ENSMUSG00000024219 | Anks1       | ankyrin repeat and SAM domain containing 1 [Source:MGI Symbol;Acc:MGI:2446180]                  | 110,5701042 | -0,4192155 | <b>-1,33720021</b> | 6,78825038 | 8,51465728 | 0,003522973 | 0,015149417 | protein_coding |
| ENSMUSG00000034616 | Ssh3        | slingshot homolog 3 (Drosophila) [Source:MGI Symbol;Acc:MGI:2683546]                            | 128,3295565 | -0,4192446 | <b>-1,33720869</b> | 7,00098133 | 8,85062572 | 0,002929884 | 0,01293836  | protein_coding |
| ENSMUSG00000030083 | Abt1        | ankyrin repeat and BTB (POZ) domain containing 1 [Source:MGI Symbol;Acc:MGI:1933148]            | 19,69115537 | -0,4193279 | <b>-1,33730438</b> | 4,28614502 | 6,14188731 | 0,013201634 | 0,045426354 | protein_coding |
| ENSMUSG00000039704 | Lmbrd2      | LMBR1 domain containing 2 [Source:MGI Symbol;Acc:MGI:2444173]                                   | 35,25691374 | -0,4201314 | <b>-1,33804944</b> | 5,13805162 | 9,09607986 | 0,002561579 | 0,011548655 | protein_coding |
| ENSMUSG00000010205 | Raver1      | ribonucleoprotein, PTB-binding 1 [Source:MGI Symbol;Acc:MGI:1919016]                            | 115,4056475 | -0,4201987 | <b>-1,33811181</b> | 6,84848238 | 10,4323501 | 0,001238271 | 0,006167217 | protein_coding |
| ENSMUSG00000090946 | Cdc471l     | coiled-coil domain containing 71 like [Source:MGI Symbol;Acc:MGI:1919373]                       | 73,60698587 | -0,4202808 | <b>-1,33818801</b> | 6,2008373  | 8,79128547 | 0,003026729 | 0,013323186 | protein_coding |
| ENSMUSG00000035443 | Thyn1       | thymocyte nuclear protein 1 [Source:MGI Symbol;Acc:MGI:1925112]                                 | 35,48821724 | -0,4204589 | <b>-1,33835324</b> | 5,1466881  | 8,43230962 | 0,003686118 | 0,015770788 | protein_coding |
| ENSMUSG00000022678 | Nde1        | nuclear distribution gene E homolog 1 (A nidulans) [Source:MGI Symbol;Acc:MGI:1914453]          | 62,76438586 | -0,4208419 | <b>-1,33770854</b> | 5,96830646 | 10,1414299 | 0,001449937 | 0,007091833 | protein_coding |
| ENSMUSG00000020009 | Ifngr1      | interferon gamma receptor 1 [Source:MGI Symbol;Acc:MGI:107655]                                  | 78,30300532 | -0,4212615 | <b>-1,33909795</b> | 6,28837266 | 10,1447031 | 0,001447165 | 0,007082405 | protein_coding |

|                    |               |                                                                                                                  |        |             |            |                    |            |            |             |             |                |
|--------------------|---------------|------------------------------------------------------------------------------------------------------------------|--------|-------------|------------|--------------------|------------|------------|-------------|-------------|----------------|
| ENSMUSG00000036246 | Gmip          | Gem-interacting protein [Source:MGI Symbol;Acc:MGI:1926066]                                                      | Sheet1 | 262,4538713 | -0,4263822 | <b>-1,34385936</b> | 8,03511931 | 8,75483128 | 0,003087829 | 0,013554128 | protein_coding |
| ENSMUSG00000031969 | Acad8         | acyl-Coenzyme A dehydrogenase family, member 8 [Source:MGI Symbol;Acc:MGI:1914198]                               |        | 27,87249773 | -0,4264231 | <b>-1,34389747</b> | 4,79667078 | 7,97492347 | 0,004742976 | 0,019359679 | protein_coding |
| ENSMUSG00000029992 | Gfpt1         | glutamine fructose-6-phosphate transaminase 1 [Source:MGI Symbol;Acc:MGI:95698]                                  |        | 100,6965982 | -0,4264936 | <b>-1,34396321</b> | 6,6519745  | 9,68947517 | 0,001853265 | 0,008799403 | protein_coding |
| ENSMUSG00000050732 | Vamp8         | vesicle-associated membrane protein 8 [Source:MGI Symbol;Acc:MGI:1336882]                                        |        | 159,0479994 | -0,4271104 | <b>-1,34453196</b> | 7,31229655 | 9,39062407 | 0,00218098  | 0,011020221 | protein_coding |
| ENSMUSG00000022089 | Bin3          | bridging integrator 3 [Source:MGI Symbol;Acc:MGI:1929883]                                                        |        | 65,49638917 | -0,4275193 | <b>-1,34491906</b> | 6,03067767 | 9,11982461 | 0,002528542 | 0,01141376  | protein_coding |
| ENSMUSG00000002222 | Rmnd5a        | required for meiotic nuclear division 5 homolog A (S. cerevisiae) [Source:MGI Symbol;Acc:MGI:1915727]            |        | 86,71013786 | -0,4276059 | <b>-1,34499971</b> | 6,43716035 | 9,56601715 | 0,001982123 | 0,009294746 | protein_coding |
| ENSMUSG00000036099 | Vezt          | vezatin, adherens junctions transmembrane protein [Source:MGI Symbol;Acc:MGI:2143698]                            |        | 61,98112375 | -0,4277032 | <b>-1,34509041</b> | 5,95258075 | 10,0375503 | 0,00153381  | 0,007456626 | protein_coding |
| ENSMUSG00000028633 | Ctps          | cytidine 5'-triphosphate synthase [Source:MGI Symbol;Acc:MGI:1858304]                                            |        | 18,62458176 | -0,4282265 | <b>-1,34561203</b> | 4,23744251 | 6,75248698 | 0,00936171  | 0,034400372 | protein_coding |
| ENSMUSG00000066551 | Hmgb1         | high mobility group box 1 [Source:MGI Symbol;Acc:MGI:96113]                                                      |        | 93,00869313 | -0,4283091 | <b>-1,34565546</b> | 5,53962162 | 10,7620395 | 0,001036032 | 0,005291901 | protein_coding |
| ENSMUSG00000048930 | Tada3         | transcriptional adaptor 3 [Source:MGI Symbol;Acc:MGI:1915724]                                                    |        | 31,90144321 | -0,4283869 | <b>-1,34572803</b> | 4,98470225 | 8,3066002  | 0,003950126 | 0,016628367 | protein_coding |
| ENSMUSG00000019139 | Isn1          | myo-inositol 1-phosphate synthase A1 [Source:MGI Symbol;Acc:MGI:1919030]                                         |        | 66,70000178 | -0,4283888 | <b>-1,34572984</b> | 6,05809145 | 10,3678708 | 0,001282273 | 0,006351821 | protein_coding |
| ENSMUSG00000031029 | Eif3f         | eukaryotic translation initiation factor 3, subunit F [Source:MGI Symbol;Acc:MGI:1913335]                        |        | 196,4821931 | -0,4292038 | <b>-1,34649029</b> | 7,61634946 | 9,18426088 | 0,002441051 | 0,011105518 | protein_coding |
| ENSMUSG00000022770 | Dlg1          | discs, large homolog 1 (Drosophila) [Source:MGI Symbol;Acc:MGI:107231]                                           |        | 78,44859916 | -0,4294196 | <b>-1,3466917</b>  | 6,2924702  | 11,0078321 | 0,009097277 | 0,004722052 | protein_coding |
| ENSMUSG00000047694 | Yip6          | Yip1 domain family, member 6 [Source:MGI Symbol;Acc:MGI:1925179]                                                 |        | 60,85214873 | -0,4301556 | <b>-1,3473789</b>  | 5,92577906 | 10,509964  | 0,001187326 | 0,005937709 | protein_coding |
| ENSMUSG00000032440 | Tgfr2         | transforming growth factor, beta receptor II [Source:MGI Symbol;Acc:MGI:98729]                                   |        | 183,8363866 | -0,4302702 | <b>-1,34748594</b> | 7,52193286 | 9,24279405 | 0,002364233 | 0,010814279 | protein_coding |
| ENSMUSG00000003062 | Stard3n1      | STAR3D N-terminal like [Source:MGI Symbol;Acc:MGI:1923455]                                                       |        | 58,92507538 | -0,4302972 | <b>-1,34751112</b> | 5,87755954 | 8,78340472 | 0,003039833 | 0,013375508 | protein_coding |
| ENSMUSG00000039685 | Myo9a         | myosin IXa [Source:MGI Symbol;Acc:MGI:107735]                                                                    |        | 57,94075976 | -0,4303599 | <b>-1,34756966</b> | 5,85328686 | 10,3543897 | 0,001291672 | 0,006392611 | protein_coding |
| ENSMUSG00000056612 | Ppp1r14b      | protein phosphatase 1, regulatory (inhibitor) subunit 14B [Source:MGI Symbol;Acc:MGI:107682]                     |        | 114,6205036 | -0,4306985 | <b>-1,34788605</b> | 6,83816752 | 10,1086952 | 0,001475714 | 0,007196448 | protein_coding |
| ENSMUSG00000027248 | Pdia3         | protein disulfide isomerase associated 3 [Source:MGI Symbol;Acc:MGI:95834]                                       |        | 584,1991318 | -0,4307655 | <b>-1,34794486</b> | 9,19038679 | 6,46982669 | 0,010972123 | 0,039165275 | protein_coding |
| ENSMUSG00000042423 | Fbrs          | fibrinogen [Source:MGI Symbol;Acc:MGI:104648]                                                                    |        | 115,32281   | -0,4311154 | <b>-1,34831168</b> | 6,8467435  | 9,82781635 | 0,001718923 | 0,008257895 | protein_coding |
| ENSMUSG00000025130 | P4hb          | prolyl 4-hydroxylase, beta polypeptide [Source:MGI Symbol;Acc:MGI:97464]                                         |        | 475,4980739 | -0,4312129 | <b>-1,34836673</b> | 8,89322072 | 6,56532466 | 0,010398477 | 0,037544549 | protein_coding |
| ENSMUSG00000022858 | Tra2b         | transformer 2 beta homolog (Drosophila) [Source:MGI Symbol;Acc:MGI:106016]                                       |        | 90,01492342 | -0,4314812 | <b>-1,34861746</b> | 6,55679991 | 10,6158651 | 0,001121215 | 0,005658607 | protein_coding |
| ENSMUSG00000070343 | Gm10288       | predicted gene 10288 [Source:MGI Symbol;Acc:MGI:3704227]                                                         |        | 219,429066  | -0,4321109 | <b>-1,34920623</b> | 7,77693222 | 8,69867708 | 0,003184411 | 0,013878271 | protein_coding |
| ENSMUSG00000002603 | Tgfb1         | transforming growth factor, beta 1 [Source:MGI Symbol;Acc:MGI:98725]                                             |        | 368,8585296 | -0,4323434 | <b>-1,34942367</b> | 8,52643533 | 8,0044905  | 0,004666149 | 0,010908154 | protein_coding |
| ENSMUSG00000059883 | Irak4         | interleukin-1 receptor-associated kinase 4 [Source:MGI Symbol;Acc:MGI:2182474]                                   |        | 51,46124951 | -0,4327079 | <b>-1,34976469</b> | 5,68046809 | 9,72685276 | 0,001815952 | 0,008663422 | protein_coding |
| ENSMUSG00000070394 | 1810027010Rik | RIKEN cDNA 1810027010 gene [Source:MGI Symbol;Acc:MGI:1916436]                                                   |        | 53,5267531  | -0,4328381 | <b>-1,34988653</b> | 5,74166748 | 9,72364787 | 0,001819121 | 0,008667252 | protein_coding |
| ENSMUSG00000038387 | Rras          | Harvey rat sarcoma oncogene, subgroup R [Source:MGI Symbol;Acc:MGI:98179]                                        |        | 76,51945334 | -0,433064  | <b>-1,35009785</b> | 6,25481759 | 8,27797497 | 0,004012886 | 0,016860259 | protein_coding |
| ENSMUSG00000045767 | B230219D22Rik | RIKEN cDNA B230219D22 gene [Source:MGI Symbol;Acc:MGI:1925771]                                                   |        | 87,05464088 | -0,4338315 | <b>-1,35081635</b> | 6,44397272 | 11,3792851 | 0,000742677 | 0,003976507 | protein_coding |
| ENSMUSG00000073423 | Zfp414        | zinc finger protein 414 [Source:MGI Symbol;Acc:MGI:1915641]                                                      |        | 19,86441375 | -0,4347304 | <b>-1,35165819</b> | 4,30199745 | 6,98125406 | 0,008236787 | 0,030886546 | protein_coding |
| ENSMUSG00000017337 | Tia1          | cytotoxic granule-associated RNA binding protein 1 [Source:MGI Symbol;Acc:MGI:107914]                            |        | 34,63489202 | -0,4348631 | <b>-1,35178255</b> | 5,10473397 | 9,0130562  | 0,002680578 | 0,011996543 | protein_coding |
| ENSMUSG00000030059 | Tmf1          | TATA element modulatory factor 1 [Source:MGI Symbol;Acc:MGI:2684999]                                             |        | 82,14328903 | -0,4361097 | <b>-1,35295107</b> | 6,35740243 | 11,8822669 | 0,000566709 | 0,00312729  | protein_coding |
| ENSMUSG00000027787 | Nmd3          | NMD3 homolog (S. cerevisiae) [Source:MGI Symbol;Acc:MGI:2140103]                                                 |        | 49,61336415 | -0,4363586 | <b>-1,35318455</b> | 6,62286764 | 11,5296061 | 0,000684965 | 0,003698139 | protein_coding |
| ENSMUSG00000062647 | Rpl7a         | ribosomal protein L7A [Source:MGI Symbol;Acc:MGI:1353472]                                                        |        | 57,13711551 | -0,4367937 | <b>-1,3535927</b>  | 8,88028396 | 7,03266576 | 0,008033613 | 0,030185171 | protein_coding |
| ENSMUSG00000021033 | Gstz1         | glutathione transferase zeta 1 (maleylacetate isomerase) [Source:MGI Symbol;Acc:MGI:1341859]                     |        | 19,88877751 | -0,4371602 | <b>-1,35393664</b> | 4,31442955 | 7,05583891 | 0,00790073  | 0,029850523 | protein_coding |
| ENSMUSG00000032026 | Rexo2         | REX2, RNA exonuclease 2 homolog (S. cerevisiae) [Source:MGI Symbol;Acc:MGI:1888981]                              |        | 82,19606685 | -0,4373212 | <b>-1,35408771</b> | 6,35934249 | 11,0556234 | 0,000884186 | 0,004617183 | protein_coding |
| ENSMUSG00000070003 | Ssbp4         | single stranded DNA binding protein 4 [Source:MGI Symbol;Acc:MGI:1924150]                                        |        | 105,8167932 | -0,4378604 | <b>-1,35459393</b> | 6,72227753 | 11,26766   | 0,000788691 | 0,004186158 | protein_coding |
| ENSMUSG00000063077 | Kif1b         | kinesin family member 1B [Source:MGI Symbol;Acc:MGI:108426]                                                      |        | 143,9767792 | -0,43808   | <b>-1,35480012</b> | 7,17118051 | 10,7782899 | 0,001026975 | 0,005252969 | protein_coding |
| ENSMUSG00000045411 | 2410002F23Rik | RIKEN cDNA 2410002F23 gene [Source:MGI Symbol;Acc:MGI:1914226]                                                   |        | 31,74898048 | -0,4384018 | <b>-1,35510237</b> | 4,97831747 | 8,39457055 | 0,003763434 | 0,016031859 | protein_coding |
| ENSMUSG00000027900 | Dram2         | DNA-damage regulated autophagy modulator 2 [Source:MGI Symbol;Acc:MGI:1914421]                                   |        | 133,5429447 | -0,4389057 | <b>-1,35557574</b> | 7,06008484 | 11,152305  | 0,000839273 | 0,004403469 | protein_coding |
| ENSMUSG00000022617 | Chkb          | choline kinase beta [Source:MGI Symbol;Acc:MGI:1328313]                                                          |        | 54,35076881 | -0,4392131 | <b>-1,35586459</b> | 5,75757832 | 9,66355691 | 0,001879593 | 0,008893666 | protein_coding |
| ENSMUSG00000097695 |               |                                                                                                                  |        | 295,0343698 | -0,4397572 | <b>-1,35637607</b> | 8,20390925 | 8,07648443 | 0,004484336 | 0,018473715 | lincRNA        |
| ENSMUSG00000040952 | Rps19         | ribosomal protein S19 [Source:MGI Symbol;Acc:MGI:1333780]                                                        |        | 440,4641451 | -0,4400088 | <b>-1,35668709</b> | 8,78232579 | 7,6282649  | 0,005746056 | 0,022799535 | protein_coding |
| ENSMUSG00000039234 | Sec24d        | Sec24 related gene family, member D (S. cerevisiae) [Source:MGI Symbol;Acc:MGI:1916858]                          |        | 94,63645735 | -0,4406474 | <b>-1,35721327</b> | 6,56612006 | 11,5387003 | 0,006861623 | 0,003683713 | protein_coding |
| ENSMUSG00000057036 | Gm7536        | predicted gene 7536 [Source:MGI Symbol;Acc:MGI:3645137]                                                          |        | 465,6081088 | -0,4406708 | <b>-1,3572325</b>  | 8,6824885  | 7,26529779 | 0,007029981 | 0,027034716 | protein_coding |
| ENSMUSG00000035545 | Leng8         | leukocyte receptor cluster (LRC) member 8 [Source:MGI Symbol;Acc:MGI:2142195]                                    |        | 213,0918913 | -0,4418688 | <b>-1,35836274</b> | 7,73254034 | 6,62907022 | 0,003308404 | 0,014361689 | protein_coding |
| ENSMUSG00000032812 | Arap1         | ArfGAP with RhoGAP domain, ankyrin repeat and PH domain 1 [Source:MGI Symbol;Acc:MGI:1916960]                    |        | 631,4288242 | -0,4426021 | <b>-1,35907036</b> | 9,3022247  | 8,53144994 | 0,010598353 | 0,038140879 | protein_coding |
| ENSMUSG00000028745 | Capz2         | capping protein (actin filament) muscle Z-line, beta [Source:MGI Symbol;Acc:MGI:104652]                          |        | 511,087109  | -0,4427713 | <b>-1,35921272</b> | 8,99729124 | 7,08820294 | 0,007759301 | 0,029386917 | protein_coding |
| ENSMUSG00000039725 | 2810408M09Rik | RIKEN cDNA 2810408M09 gene [Source:MGI Symbol;Acc:MGI:1918294]                                                   |        | 100,5113088 | -0,4430869 | <b>-1,35951013</b> | 6,65281598 | 12,555857  | 0,000394966 | 0,002284379 | protein_coding |
| ENSMUSG00000027357 | Crls1         | cardiolipin synthase 1 [Source:MGI Symbol;Acc:MGI:1913836]                                                       |        | 28,68165772 | -0,4431616 | <b>-1,35958057</b> | 4,83507003 | 8,03735746 | 0,004582233 | 0,018827599 | protein_coding |
| ENSMUSG00000045752 | Tssc4         | tumor-suppressing subchromosomal transferable fragment 4 [Source:MGI Symbol;Acc:MGI:1861712]                     |        | 19,41194266 | -0,4445591 | <b>-1,36089816</b> | 4,26771136 | 7,24363302 | 0,007115286 | 0,002729567 | protein_coding |
| ENSMUSG00000026395 | Ptpcr         | protein tyrosine phosphatase, receptor type, C [Source:MGI Symbol;Acc:MGI:97810]                                 |        | 628,0677518 | -0,4446173 | <b>-1,3609531</b>  | 9,29464068 | 6,7677501  | 0,009281967 | 0,034153039 | protein_coding |
| ENSMUSG00000041313 | Slc7a1        | solute carrier family 7 (cationic amino acid transporter, y+ system), member 1 [Source:MGI Symbol;Acc:MGI:88117] |        | 68,7540206  | -0,4454048 | <b>-1,36169614</b> | 6,09879642 | 8,36936544 | 0,003815988 | 0,016180786 | protein_coding |
| ENSMUSG00000034007 | Scaper        | S phase cyclin A-associated protein in the ER [Source:MGI Symbol;Acc:MGI:1925976]                                |        | 19,86731769 | -0,4457138 | <b>-1,36187583</b> | 4,31141748 | 7,67840186 | 0,005588564 | 0,022729228 | protein_coding |
| ENSMUSG00000034673 | Pbx2          | PBX2, homeobox 2 [Source:MGI Symbol;Acc:MGI:1341793]                                                             |        | 76,96898154 | -0,4460083 | <b>-1,3626585</b>  | 6,26271925 | 9,70708928 | 0,001835585 | 0,008730552 | protein_coding |
| ENSMUSG00000044952 | Kctd21        | potassium channel tetramerisation domain containing 21 [Source:MGI Symbol;Acc:MGI:3643121]                       |        | 16,70127666 | -0,446286  | <b>-1,36252815</b> | 4,05477765 | 6,55207961 | 0,010476164 | 0,037750612 | protein_coding |
| ENSMUSG00000020107 | Anapc16       | anaphase promoting complex subunit 16 [Source:MGI Symbol;Acc:MGI:1289325]                                        |        | 36,25759062 | -0,4467303 | <b>-1,36294776</b> | 5,17185861 | 9,47477385 | 0,002083166 | 0,009702306 | protein_coding |
| ENSMUSG00000027523 | Gnas          | GNAS (guanine nucleotide binding protein, alpha stimulating) complex locus [Source:MGI Symbol;Acc:MGI:95777]     |        | 793,8724213 | -0,4468571 | <b>-1,36306758</b> | 9,63256133 | 5,97338176 | 0,014523402 | 0,048977478 | protein_coding |
| ENSMUSG00000024401 | Tnf           | tumor necrosis factor [Source:MGI Symbol;Acc:MGI:104798]                                                         |        | 180,4077834 | -0,4469171 | <b>-1,3631243</b>  | 7,49724402 | 10,5165834 | 0,00118308  | 0,005921869 | protein_coding |
| ENSMUSG00000001065 | Zfp276        | zinc finger protein (C2H2 type) 276 [Source:MGI Symbol;Acc:MGI:1888495]                                          |        | 32,17245633 | -0,4470324 | <b>-1,36323323</b> | 4,99463024 | 8,81936306 | 0,002980507 | 0,013147669 | protein_coding |
| ENSMUSG00000031165 | Was           | Wiskott-Aldrich syndrome homolog (human) [Source:MGI Symbol;Acc:MGI:105059]                                      |        | 90,669966   | -0,4474232 | <b>-1,36360255</b> | 6,49866314 | 10,1335168 | 0,001455974 | 0,007113542 | protein_coding |
| ENSMUSG00000033720 | Sfnx5         | sideroflexin 5 [Source:MGI Symbol;Acc:MGI:2137681]                                                               |        | 57,37918024 | -0,4478955 | <b>-1,36404905</b> | 5,83968954 | 9,03437549 | 0,002649496 | 0,011876788 | protein_coding |
| ENSMUSG00000040296 | Ddx58         | DEAD (Asp-Glu-Ala-Asp) box polypeptide 58 [Source:MGI Symbol;Acc:MGI:2442858]                                    |        | 160,0011713 | -0,4482427 | <b>-1,3643773</b>  | 7,32168136 | 11,500862  | 0,00695639  | 0,003746563 | protein_coding |
| ENSMUSG00000000282 | Mnt           | max binding protein [Source:MGI Symbol;Acc:MGI:109150]                                                           |        | 67,43161327 | -0,4488825 | <b>-1,36479333</b> | 6,0685163  | 11,0852835 | 0,000870155 | 0,004554738 | protein_coding |
| ENSMUSG00000078853 | Igtp          | interferon gamma induced GTPase [Source:MGI Symbol;Acc:MGI:107729]                                               |        | 76,55026159 | -0,4488133 | <b>-1,36491705</b> | 6,25991316 | 10,4952151 | 0,001196841 | 0,005982571 | protein_coding |
| ENSMUSG00000024158 | Hagh          | hydroxyacyl glutathione hydrolase [Source:MGI Symbol;Acc:MGI:95745]                                              |        | 21,48720337 | -0,449082  | <b>-1,36517131</b> | 4,41961861 | 8,04741185 | 0,004556871 | 0,018730393 | protein_coding |
| ENSMUSG00000038671 | Arfp1         | ADP-ribosylation factor related protein 1 [Source:MGI Symbol;Acc:MGI:1923938]                                    |        | 33,35282023 | -0,4495298 | <b>-1,36559508</b> | 5,05669394 | 8,53665503 | 0,003480647 | 0,015008582 | protein_coding |
| ENSMUSG00000074129 | Rpl13a        | ribosomal protein L13A [Source:MGI Symbol;Acc:MGI:1351455]                                                       |        |             |            |                    |            |            |             |             |                |

|                    |               |                                                                                                                |        |             |            |                    |            |             |              |             |                    |
|--------------------|---------------|----------------------------------------------------------------------------------------------------------------|--------|-------------|------------|--------------------|------------|-------------|--------------|-------------|--------------------|
| ENSMUSG0000022364  | Wdr67         | WD repeat domain 67 [Source:MGI Symbol;Acc:MGI:2684931]                                                        | Sheet1 | 33,11974255 | -0,4506008 | <b>-1,36660925</b> | 5,03950999 | 9,74953055  | 0,001793685  | 0,008579547 | protein_coding     |
| ENSMUSG0000060477  | Irak2         | interleukin-1 receptor-associated kinase 2 [Source:MGI Symbol;Acc:MGI:2429603]                                 |        | 134,3090028 | -0,4508391 | <b>-1,36683499</b> | 7,0700351  | 11,6169529  | 0,000653534  | 0,003545865 | protein_coding     |
| ENSMUSG0000024937  | Ehbp111       | EH domain binding protein 1-like 1 [Source:MGI Symbol;Acc:MGI:3612340]                                         |        | 507,6719955 | -0,4515371 | <b>-1,3674965</b>  | 8,98723447 | 7,07868653  | 0,007800617  | 0,02953321  | protein_coding     |
| ENSMUSG0000033068  | Entpd6        | ectonucleoside triphosphate diphosphohydrolase 6 [Source:MGI Symbol;Acc:MGI:1202295]                           |        | 30,66926812 | -0,4521829 | <b>-1,36810874</b> | 4,93380576 | 9,453121008 | 0,001110098  | 0,00981942  | protein_coding     |
| ENSMUSG0000028719  | Cmpk1         | cytidine monophosphate (UMP-CMP) kinase 1 [Source:MGI Symbol;Acc:MGI:1913838]                                  |        | 179,5066723 | -0,4523938 | <b>-1,36830875</b> | 7,48845994 | 11,7303414  | 0,000614893  | 0,00336111  | protein_coding     |
| ENSMUSG0000000552  | Zfp385a       | zinc finger protein 385A [Source:MGI Symbol;Acc:MGI:1352495]                                                   |        | 83,27853319 | -0,4524575 | <b>-1,36836918</b> | 6,37390332 | 12,6774233  | 0,000370097  | 0,002115831 | protein_coding     |
| ENSMUSG0000037752  | Xkr8          | X Kell blood group precursor related family member 8 homolog [Source:MGI Symbol;Acc:MGI:2685877]               |        | 16,9755442  | -0,4525444 | <b>-1,36845159</b> | 4,08609941 | 6,17048651  | 0,012989888  | 0,04489459  | protein_coding     |
| ENSMUSG0000090841  | Myf6          | myosin, light polypeptide 6, alkali, smooth muscle and non-muscle [Source:MGI Symbol;Acc:MGI:109318]           |        | 549,2295102 | -0,4528674 | <b>-1,36875804</b> | 9,10112448 | 7,25461242  | 0,007071913  | 0,027158026 | protein_coding     |
| ENSMUSG0000041417  | Pik3r1        | phosphatidylinositol 3-kinase, regulatory subunit, polypeptide 1 (p85 alpha) [Source:MGI Symbol;Acc:MGI:97583] |        | 169,1184768 | -0,4530111 | <b>-1,36889422</b> | 7,40090909 | 11,2540145  | 0,00079451   | 0,004209367 | protein_coding     |
| ENSMUSG0000028382  | Rod1          | ROD1 regulator of differentiation 1 (S. pombe) [Source:MGI Symbol;Acc:MGI:1923334]                             |        | 464,3946249 | -0,4531489 | <b>-1,36902513</b> | 8,85913538 | 7,4077883   | 0,006493869  | 0,025273873 | protein_coding     |
| ENSMUSG0000043483  | Gm6863        | predicted gene 6863 [Source:MGI Symbol;Acc:MGI:3647386]                                                        |        | 82,96652313 | -0,4535514 | <b>-1,36940707</b> | 6,37319885 | 10,5713385  | 0,001148545  | 0,005772675 | accessed_pseudogen |
| ENSMUSG0000056131  | Pgm3          | phosphoglucomutase 3 [Source:MGI Symbol;Acc:MGI:97566]                                                         |        | 17,44652427 | -0,4539578 | <b>-1,36979295</b> | 4,12025345 | 6,5569657   | 0,010447436  | 0,037694682 | protein_coding     |
| ENSMUSG0000021886  | Gpr65         | G-protein coupled receptor 65 [Source:MGI Symbol;Acc:MGI:108031]                                               |        | 32,56854817 | -0,4544236 | <b>-1,37023527</b> | 5,02573249 | 8,87548817  | 0,002890249  | 0,01280967  | protein_coding     |
| ENSMUSG0000021936  | Mapk8         | mitogen-activated protein kinase 8 [Source:MGI Symbol;Acc:MGI:1346861]                                         |        | 17,77924645 | -0,4551706 | <b>-1,37094496</b> | 4,15133558 | 7,55077478  | 0,005998428  | 0,023630235 | protein_coding     |
| ENSMUSG0000028161  | Ppp3ca        | protein phosphatase 3, catalytic subunit, alpha isoform [Source:MGI Symbol;Acc:MGI:107164]                     |        | 119,0859803 | -0,4553105 | <b>-1,37107787</b> | 6,89332717 | 12,3990163  | 0,00042956   | 0,002453002 | protein_coding     |
| ENSMUSG0000047735  | Samd9l        | sterile alpha motif domain containing 9-like [Source:MGI Symbol;Acc:MGI:1343184]                               |        | 155,8900315 | -0,4555885 | <b>-1,37134208</b> | 7,28299321 | 12,0684929  | 0,000512811  | 0,002868767 | protein_coding     |
| ENSMUSG0000033909  | Usp36         | ubiquitin specific peptidase 36 [Source:MGI Symbol;Acc:MGI:1919594]                                            |        | 63,86377762 | -0,4558755 | <b>-1,37161495</b> | 5,99395255 | 10,7265600  | 0,00506634   | 0,002632121 | protein_coding     |
| ENSMUSG0000040158  | Tax1bp3       | Tax1 (human T cell leukemia virus type I) binding protein 3 [Source:MGI Symbol;Acc:MGI:1923531]                |        | 42,38773268 | -0,4560611 | <b>-1,37179134</b> | 5,40525509 | 10,0157164  | 0,0015521    | 0,007532211 | protein_coding     |
| ENSMUSG0000073481  | Mosc2         | MOCO sulphurase C-terminal domain containing 2 [Source:MGI Symbol;Acc:MGI:1914497]                             |        | 50,69417094 | -0,4562623 | <b>-1,37198267</b> | 5,65773618 | 10,6358241  | 0,001109178  | 0,005608166 | protein_coding     |
| ENSMUSG0000021000  | Ctage5        | CTAGE family, member 5 [Source:MGI Symbol;Acc:MGI:1346056]                                                     |        | 127,2573635 | -0,4567829 | <b>-1,37247793</b> | 6,99021945 | 11,2221934  | 0,000808249  | 0,00427963  | protein_coding     |
| ENSMUSG0000039621  | Prex1         | phosphatidylinositol-3,4,5-trisphosphate-dependent Rac exchange factor 1 [Source:MGI Symbol;Acc:MGI:3040696]   |        | 773,9917972 | -0,4575375 | <b>-1,37319595</b> | 9,59598957 | 6,22627259  | 0,012583643  | 0,04372438  | protein_coding     |
| ENSMUSG0000028452  | Vcp           | valosin containing protein [Source:MGI Symbol;Acc:MGI:99919]                                                   |        | 140,2108338 | -0,4575553 | <b>-1,37321072</b> | 9,53179826 | 6,52902136  | 0,010612833  | 0,038180483 | protein_coding     |
| ENSMUSG0000005774  | Rfx5          | regulatory factor X, 5 (influences HLA class II expression) [Source:MGI Symbol;Acc:MGI:1858421]                |        | 18,99715303 | -0,4576753 | <b>-1,37332716</b> | 4,23811208 | 6,75585718  | 0,009344045  | 0,03434694  | protein_coding     |
| ENSMUSG0000074064  | Mlycd         | malonyl-CoA decarboxylase [Source:MGI Symbol;Acc:MGI:1928485]                                                  |        | 18,51305617 | -0,4581249 | <b>-1,37375512</b> | 4,19728565 | 7,52922222  | 0,006070611  | 0,023880345 | protein_coding     |
| ENSMUSG00000020133 | 2310011J03Rik | RIKEN cDNA 2310011J03 gene [Source:MGI Symbol;Acc:MGI:1913624]                                                 |        | 65,92131922 | -0,4586306 | <b>-1,37423679</b> | 6,03687863 | 10,8600751  | 0,000982597  | 0,005063693 | protein_coding     |
| ENSMUSG0000029196  | Tada2b        | transcriptional adaptor 2B [Source:MGI Symbol;Acc:MGI:3035274]                                                 |        | 21,89416441 | -0,4595753 | <b>-1,37513697</b> | 4,44697092 | 7,11483454  | 0,007644866  | 0,028983486 | protein_coding     |
| ENSMUSG0000028149  | Rap1gds1      | RAP1, GTP-GDP dissociation stimulator 1 [Source:MGI Symbol;Acc:MGI:2385189]                                    |        | 213,8384662 | -0,4596244 | <b>-1,37518376</b> | 7,7407005  | 10,46242    | 0,001218276  | 0,006081416 | protein_coding     |
| ENSMUSG0000030680  | 2900092E17Rik | RIKEN cDNA 2900092E17 gene [Source:MGI Symbol;Acc:MGI:1914528]                                                 |        | 19,01101093 | -0,4597398 | <b>-1,3752938</b>  | 4,23207863 | 7,18978146  | 0,007331991  | 0,027990474 | protein_coding     |
| ENSMUSG00000019849 | Prep          | prolyl endopeptidase [Source:MGI Symbol;Acc:MGI:1270863]                                                       |        | 99,65238298 | -0,4600017 | <b>-1,3755434</b>  | 6,63887056 | 12,2012541  | 0,0004477574 | 0,002701908 | protein_coding     |
| ENSMUSG0000025007  | Aldh18a1      | aldehyde dehydrogenase 18 family, member A1 [Source:MGI Symbol;Acc:MGI:1888908]                                |        | 36,04045882 | -0,4613019 | <b>-1,37678369</b> | 5,16221804 | 8,22052521  | 0,004141921  | 0,017309733 | protein_coding     |
| ENSMUSG0000024750  | Zfand5        | zinc finger, AN1-type domain 5 [Source:MGI Symbol;Acc:MGI:1278334]                                             |        | 367,6366097 | -0,4626261 | <b>-1,37804794</b> | 8,5221211  | 8,7269212   | 0,003135455  | 0,013719333 | protein_coding     |
| ENSMUSG0000086784  | Isoe2a        | isochorismatase domain containing 2a [Source:MGI Symbol;Acc:MGI:3609243]                                       |        | 23,93464479 | -0,4630466 | <b>-1,37844972</b> | 4,57717065 | 8,85172904  | 0,002928114  | 0,01293574  | protein_coding     |
| ENSMUSG0000037443  | Ccdc21        | coiled-coil domain containing 21 [Source:MGI Symbol;Acc:MGI:1912726]                                           |        | 37,74437063 | -0,463234  | <b>-1,3786287</b>  | 5,2350742  | 10,2871194  | 0,001339621  | 0,006609076 | protein_coding     |
| ENSMUSG0000060376  | Bckdh1        | branched chain ketoacid dehydrogenase E1, alpha polypeptide [Source:MGI Symbol;Acc:MGI:107701]                 |        | 37,87431664 | -0,4633532 | <b>-1,37874267</b> | 5,22916888 | 11,0095257  | 0,000906448  | 0,004719975 | protein_coding     |
| ENSMUSG0000038056  | Mli3          | myeloid/lymphoid or mixed-lineage leukemia 3 [Source:MGI Symbol;Acc:MGI:2444959]                               |        | 103,0845796 | -0,4633796 | <b>-1,37876786</b> | 6,68592628 | 13,6266241  | 0,000223     | 0,001376464 | protein_coding     |
| ENSMUSG0000064345  | mt-Nd2        | mitochondrially encoded NADH dehydrogenase 2 [Source:MGI Symbol;Acc:MGI:102500]                                |        | 683,1521599 | -0,4636851 | <b>-1,37905989</b> | 9,41612422 | 7,12394947  | 0,007606097  | 0,028865439 | protein_coding     |
| ENSMUSG0000061838  | Succl2g       | succinate-Coenzyme A ligase, GDP-forming, beta subunit [Source:MGI Symbol;Acc:MGI:1306824]                     |        | 26,69015199 | -0,4639187 | <b>-1,37923321</b> | 4,73891017 | 9,54566863  | 0,002004218  | 0,009386336 | protein_coding     |
| ENSMUSG0000066258  | Trim12a       | tripartite motif-containing 12A [Source:MGI Symbol;Acc:MGI:1923931]                                            |        | 38,61280576 | -0,4642929 | <b>-1,37964101</b> | 5,26325902 | 10,8279263  | 0,00099806   | 0,005133114 | protein_coding     |
| ENSMUSG0000039048  | Foxred1       | FAD-dependent oxidoreductase domain containing 1 [Source:MGI Symbol;Acc:MGI:2446262]                           |        | 29,52231732 | -0,4645773 | <b>-1,37991303</b> | 4,87387629 | 8,66288387  | 0,003247569  | 0,014131106 | protein_coding     |
| ENSMUSG0000035967  | Ddx26b        | DEAD/H (Asp-Glu-Ala-Asp/His) box polypeptide 26B [Source:MGI Symbol;Acc:MGI:2442593]                           |        | 89,07822926 | -0,4646145 | <b>-1,37994856</b> | 6,47183092 | 12,4276535  | 0,000423023  | 0,002419445 | protein_coding     |
| ENSMUSG0000031839  | Hspb1         | heat shock factor binding protein 1 [Source:MGI Symbol;Acc:MGI:1915446]                                        |        | 197,7740552 | -0,4670069 | <b>-1,38223881</b> | 7,6278142  | 9,4265924   | 0,002138613  | 0,009943691 | protein_coding     |
| ENSMUSG0000001175  | Calm1         | calmodulin 1 [Source:MGI Symbol;Acc:MGI:88251]                                                                 |        | 881,5939263 | -0,4677523 | <b>-1,38295319</b> | 9,78395617 | 6,3452805   | 0,0117694    | 0,041578905 | protein_coding     |
| ENSMUSG0000090247  | Bloc1s1       | biogenesis of lysosome-related organelles complex-1, subunit 1 [Source:MGI Symbol;Acc:MGI:1195276]             |        | 30,59543968 | -0,4684822 | <b>-1,38365299</b> | 4,92810703 | 7,93920152  | 0,004837518  | 0,019641921 | protein_coding     |
| ENSMUSG0000033705  | Stard9        | START domain containing 9 [Source:MGI Symbol;Acc:MGI:3045258]                                                  |        | 165,0108563 | -0,4685551 | <b>-1,38372295</b> | 7,36430497 | 12,702086   | 0,000365248  | 0,002133428 | protein_coding     |
| ENSMUSG0000021830  | Txndc16       | thioredoxin domain containing 16 [Source:MGI Symbol;Acc:MGI:1917811]                                           |        | 34,07993782 | -0,4688524 | <b>-1,3840081</b>  | 5,08464985 | 11,0670727  | 0,000887743  | 0,004593126 | protein_coding     |
| ENSMUSG0000059005  | Hnrmpa3       | heterogeneous nuclear ribonucleoprotein A3 [Source:MGI Symbol;Acc:MGI:1917171]                                 |        | 225,0532206 | -0,4691238 | <b>-1,38426854</b> | 7,81336891 | 11,3568661  | 0,000751696  | 0,004017741 | protein_coding     |
| ENSMUSG0000063253  | Scoc          | short coiled-coil protein [Source:MGI Symbol;Acc:MGI:1927654]                                                  |        | 52,08683025 | -0,4693025 | <b>-1,38443996</b> | 5,70173041 | 12,3200136  | 0,000448127  | 0,002547116 | protein_coding     |
| ENSMUSG0000032615  | Nt5m          | 5',3'-nucleotidase, mitochondrial [Source:MGI Symbol;Acc:MGI:1917127]                                          |        | 16,91132063 | -0,4700745 | <b>-1,38518104</b> | 4,06581949 | 7,07641396  | 0,007810516  | 0,029560504 | protein_coding     |
| ENSMUSG0000053063  | Clec12a       | C-type lectin domain family 12, member A [Source:MGI Symbol;Acc:MGI:3040968]                                   |        | 413,4032531 | -0,4701169 | <b>-1,38522174</b> | 8,69128113 | 8,27447628  | 0,004020626  | 0,016879869 | protein_coding     |
| ENSMUSG0000073079  | Srp54c        | signal recognition particle 54C [Source:MGI Symbol;Acc:MGI:3714359]                                            |        | 43,49240407 | -0,470205  | <b>-1,38530633</b> | 5,45434274 | 11,2889971  | 0,000779678  | 0,004146658 | protein_coding     |
| ENSMUSG0000092329  | Gm20388       | predicted gene 20388 [Source:MGI Symbol;Acc:MGI:5141853]                                                       |        | 59,02260481 | -0,4705675 | <b>-1,38565445</b> | 5,88499597 | 6,19506776  | 0,012810682  | 0,044400935 | protein_coding     |
| ENSMUSG0000024982  | Zdhhc6        | zinc finger, DHHC domain containing 6 [Source:MGI Symbol;Acc:MGI:1914230]                                      |        | 82,49981854 | -0,4715166 | <b>-1,38656629</b> | 6,36687761 | 12,2171512  | 0,000473522  | 0,002680363 | protein_coding     |
| ENSMUSG0000073609  | D2hgdh        | D-2-hydroxyglutarate dehydrogenase [Source:MGI Symbol;Acc:MGI:2138209]                                         |        | 17,62577281 | -0,4716354 | <b>-1,38668044</b> | 4,12982559 | 7,84556098  | 0,005094565  | 0,020571107 | protein_coding     |
| ENSMUSG0000029033  | Acap3         | ArfGAP with coiled-coil, ankryrin repeat and PH domains 3 [Source:MGI Symbol;Acc:MGI:2153589]                  |        | 22,04166007 | -0,4719221 | <b>-1,38695607</b> | 4,5269905  | 8,94345416  | 0,002784656  | 0,012401711 | protein_coding     |
| ENSMUSG0000028568  | Btf3l4        | basic transcription factor 3-like 4 [Source:MGI Symbol;Acc:MGI:1915312]                                        |        | 42,91670107 | -0,4720117 | <b>-1,38704732</b> | 5,41825013 | 11,1853997  | 0,000824435  | 0,004348645 | protein_coding     |
| ENSMUSG0000049734  | Trex1         | three prime repair exonuclease 1 [Source:MGI Symbol;Acc:MGI:1328317]                                           |        | 73,00645911 | -0,4720523 | <b>-1,38708121</b> | 6,18776281 | 11,6553313  | 0,000640188  | 0,003483777 | protein_coding     |
| ENSMUSG0000020770  | Unk           | unknown homolog (Drosophila) [Source:MGI Symbol;Acc:MGI:2442456]                                               |        | 29,76430257 | -0,4720565 | <b>-1,38708531</b> | 4,88737009 | 10,7193277  | 0,001060222  | 0,005393734 | protein_coding     |
| ENSMUSG0000034709  | Klraq1        | KLRAQ motif containing 1 [Source:MGI Symbol;Acc:MGI:1921075]                                                   |        | 85,462878   | -0,4720753 | <b>-1,38710332</b> | 6,41727805 | 11,82769    | 0,000583563  | 0,00321223  | protein_coding     |
| ENSMUSG0000026737  | Pip4k2a       | phosphatidylinositol-5-phosphate 4-kinase, type II, alpha [Source:MGI Symbol;Acc:MGI:1298206]                  |        | 195,0564445 | -0,4722275 | <b>-1,38724973</b> | 7,60639614 | 10,8193315  | 0,001004457  | 0,005154589 | protein_coding     |
| ENSMUSG0000015733  | Capza2        | capping protein (actin filament) muscle Z-line, alpha 2 [Source:MGI Symbol;Acc:MGI:106222]                     |        | 655,6448602 | -0,4725961 | <b>-1,38760415</b> | 9,35671341 | 7,17943597  | 0,007374389  | 0,028113258 | protein_coding     |
| ENSMUSG0000038368  | BC057079      | cDNA sequence BC057079 [Source:MGI Symbol;Acc:MGI:2676921]                                                     |        | 20,60389315 | -0,4727732 | <b>-1,38777452</b> | 4,35855896 | 8,81913939  | 0,00298072   | 0,013147669 | protein_coding     |

|                     |               |                                                                                                                       |        |  |             |            |             |            |            |              |             |                |
|---------------------|---------------|-----------------------------------------------------------------------------------------------------------------------|--------|--|-------------|------------|-------------|------------|------------|--------------|-------------|----------------|
| ENSMUSG00000090877  | Hspa1b        | heat shock protein 1B [Source:MGI Symbol;Acc:MGI:99517]                                                               |        |  | 18,17094365 | -0,4753883 | -1,39029241 | 4,22476043 | 6,29152105 | 0,01213169   | 0,04255775  | protein_coding |
| ENSMUSG00000041084  | Ostc          | oligosaccharyltransferase complex subunit [Source:MGI Symbol;Acc:MGI:1913607]                                         | Sheet1 |  | 59,93107348 | -0,4756884 | -1,39058158 | 5,90599156 | 11,9922103 | 0,000534234  | 0,002975718 | protein_coding |
| ENSMUSG00000020553  | Pcpt          | phosphatidylcholine transfer protein [Source:MGI Symbol;Acc:MGI:107375]                                               |        |  | 52,69480583 | -0,4768822 | -1,39173272 | 5,71810082 | 12,7210334 | 0,000361566  | 0,00211417  | protein_coding |
| ENSMUSG00000071041  | Gm15210       | predicted gene 15210 [Source:MGI Symbol;Acc:MGI:3705743]                                                              |        |  | 26,49847178 | -0,477365  | -1,39219854 | 4,72091313 | 9,64698224 | 0,001896629  | 0,008939624 | pseudogene     |
| ENSMUSG00000028467  | Gba2          | glucosidase beta 2 [Source:MGI Symbol;Acc:MGI:2654325]                                                                |        |  | 24,99687077 | -0,4777048 | -1,39252652 | 4,62735704 | 8,21903255 | 0,0004145329 | 0,017317389 | protein_coding |
| ENSMUSG00000022982  | Sod1          | superoxide dismutase 1, soluble [Source:MGI Symbol;Acc:MGI:98351]                                                     |        |  | 195,3670776 | -0,4782788 | -1,39308068 | 7,60952386 | 12,4442835 | 0,000419273  | 0,002400497 | protein_coding |
| ENSMUSG00000095677  | Dynl1f        | dynein light chain Tctex-type 1F [Source:MGI Symbol;Acc:MGI:3780996]                                                  |        |  | 37,96096929 | -0,4784263 | -1,39322311 | 5,25029049 | 11,1575119 | 0,000836921  | 0,004394804 | protein_coding |
| ENSMUSG00000029575  | Mmap          | methylmalonic aciduria (cobalamin deficiency) type B homolog (human)                                                  |        |  | 16,72959177 | -0,4796097 | -1,39436643 | 4,04864615 | 6,81820938 | 0,00029233   | 0,033391375 | protein_coding |
| ENSMUSG00000028868  | Wasf2         | WAS protein family, member 2 [Source:MGI Symbol;Acc:MGI:1098641]                                                      |        |  | 387,1733547 | -0,4796504 | -1,39440577 | 8,59646706 | 9,17491662 | 0,002453545  | 0,011153125 | protein_coding |
| ENSMUSG00000086583  | Gm15500       | predicted pseudogene 15500 [Source:MGI Symbol;Acc:MGI:3782947]                                                        |        |  | 623,8122435 | -0,4811172 | -1,39582411 | 9,28479636 | 7,70402412 | 0,000509785  | 0,02201265  | pseudogene     |
| ENSMUSG00000055805  | Fmn11         | formin-like 1 [Source:MGI Symbol;Acc:MGI:1888994]                                                                     |        |  | 224,6937695 | -0,4812465 | -1,39594931 | 7,8100949  | 10,6426385 | 0,001105099  | 0,005592687 | protein_coding |
| ENSMUSG00000044465  | Fam160a2      | family with sequence similarity 160, member A2 [Source:MGI Symbol;Acc:MGI:1921599]                                    |        |  | 29,19521201 | -0,4812709 | -1,39597285 | 4,86133041 | 10,6729295 | 0,001087148  | 0,005511996 | protein_coding |
| ENSMUSG00000030275  | Etnk1         | ethanolamine kinase 1 [Source:MGI Symbol;Acc:MGI:1922570]                                                             |        |  | 137,666717  | -0,4816174 | -1,39630815 | 7,10350964 | 13,302671  | 0,0002265028 | 0,0160345   | protein_coding |
| ENSMUSG00000036565  | Tyh3          | twenty homolog 3 (Drosophila) [Source:MGI Symbol;Acc:MGI:1925589]                                                     |        |  | 139,725975  | -0,4827403 | -1,39739544 | 7,12372067 | 11,6970432 | 0,000625995  | 0,003414998 | protein_coding |
| ENSMUSG00000023030  | Slc11a2       | solute carrier family 11 (proton-coupled divalent metal ion transporters), member 2 [Source:MGI Symbol;Acc:MGI:13452] |        |  | 334,8334027 | -0,4837982 | -1,39842042 | 8,38721245 | 10,1061595 | 0,001477746  | 0,007199997 | protein_coding |
| ENSMUSG000000021205 | Ppp1r13b      | protein phosphatase 1, regulatory (inhibitor) subunit 13B [Source:MGI Symbol;Acc:MGI:1336199]                         |        |  | 46,61871834 | -0,4838618 | -1,39848207 | 5,5417276  | 11,1835862 | 0,000825241  | 0,004348645 | protein_coding |
| ENSMUSG00000023022  | Lim1          | LIM domain and actin binding 1 [Source:MGI Symbol;Acc:MGI:1920992]                                                    |        |  | 228,8946593 | -0,4838737 | -1,39849367 | 7,83881496 | 12,1893457 | 0,000480632  | 0,002712735 | protein_coding |
| ENSMUSG00000030727  | Rabep2        | rabapin, RAB GTPase binding effector protein 2 [Source:MGI Symbol;Acc:MGI:1917564]                                    |        |  | 32,82245951 | -0,4839493 | -1,39856696 | 5,02284324 | 10,9019889 | 0,000906011  | 0,004959694 | protein_coding |
| ENSMUSG00000046230  | Vps13a        | vacuolar protein sorting 13A (yeast) [Source:MGI Symbol;Acc:MGI:2444304]                                              |        |  | 59,39215084 | -0,4840805 | -1,39869414 | 5,88763463 | 13,5246862 | 0,000235446  | 0,001444356 | protein_coding |
| ENSMUSG00000028556  | Dock7         | dedicator of cytokinesis 7 [Source:MGI Symbol;Acc:MGI:1914549]                                                        |        |  | 132,5690361 | -0,4853991 | -1,40010891 | 7,05063697 | 13,6604085 | 0,000219024  | 0,001356245 | protein_coding |
| ENSMUSG00000032399  | Rpl4          | ribosomal protein L4 [Source:MGI Symbol;Acc:MGI:1915141]                                                              |        |  | 1171,074289 | -0,4866246 | -1,4011628  | 10,193506  | 6,14568751 | 0,013173294  | 0,04535725  | protein_coding |
| ENSMUSG00000041164  | Zmiz2         | zinc finger, MIZ-type containing 2 [Source:MGI Symbol;Acc:MGI:106374]                                                 |        |  | 184,3818914 | -0,4869916 | -1,40151931 | 7,52464674 | 11,8223386 | 0,000585243  | 0,003218251 | protein_coding |
| ENSMUSG00000007850  | Hnrmp1        | heterogeneous nuclear ribonucleoprotein H1 [Source:MGI Symbol;Acc:MGI:1891925]                                        |        |  | 215,1805179 | -0,4883207 | -1,40281109 | 7,74812381 | 12,0170632 | 0,000527157  | 0,002943025 | protein_coding |
| ENSMUSG00000026942  | Traf2         | TNF receptor-associated factor 2 [Source:MGI Symbol;Acc:MGI:101835]                                                   |        |  | 44,78143827 | -0,4883424 | -1,4028321  | 5,48250638 | 11,5524281 | 0,000676608  | 0,003662018 | protein_coding |
| ENSMUSG00000034118  | Tpst1         | protein-tyrosine sulfotransferase 1 [Source:MGI Symbol;Acc:MGI:1298231]                                               |        |  | 15,95529969 | -0,4884555 | -1,40294211 | 4,00031758 | 8,23086767 | 0,004118384  | 0,017231028 | protein_coding |
| ENSMUSG00000039656  | Rxrb          | retinoid X receptor beta [Source:MGI Symbol;Acc:MGI:98215]                                                            |        |  | 46,20836584 | -0,4888395 | -1,40331558 | 5,52147594 | 10,3180815 | 0,0001317332 | 0,00650347  | protein_coding |
| ENSMUSG00000055435  | Maf           | avian musculoaponeurotic fibrosarcoma (v-maf) AS42 oncogene homolog [Source:MGI Symbol;Acc:MGI:96909]                 |        |  | 695,9688949 | -0,4890656 | -1,40353551 | 9,44271685 | 7,01751586 | 0,008071614  | 0,030350041 | protein_coding |
| ENSMUSG00000046245  | Pilra         | paired immunoglobulin-like type 2 receptor alpha [Source:MGI Symbol;Acc:MGI:2450529]                                  |        |  | 64,3967816  | -0,4891364 | -1,40360444 | 6,01139531 | 8,52272898 | 0,003507382  | 0,015094242 | protein_coding |
| ENSMUSG00000038291  | Snx25         | sorting nexin 25 [Source:MGI Symbol;Acc:MGI:2142610]                                                                  |        |  | 25,59052591 | -0,4892669 | -1,40373136 | 4,67953636 | 10,5522164 | 0,001160488  | 0,005828447 | protein_coding |
| ENSMUSG00000018008  | Cyth4         | cytohesin 4 [Source:MGI Symbol;Acc:MGI:2441702]                                                                       |        |  | 934,5783313 | -0,489398  | -1,40385897 | 9,86802039 | 6,49175929 | 0,010837568  | 0,038785784 | protein_coding |
| ENSMUSG00000020372  | Gnb2l1        | guanine nucleotide binding protein (G protein), beta polypeptide 2 like 1 [Source:MGI Symbol;Acc:MGI:101849]          |        |  | 953,6859418 | -0,4895512 | -1,40400808 | 9,89719783 | 6,65826678 | 0,009869686  | 0,036005494 | protein_coding |
| ENSMUSG00000025935  | Tram1         | translocating chain-associating membrane protein 1 [Source:MGI Symbol;Acc:MGI:1919515]                                |        |  | 168,5681581 | -0,4897137 | -1,40416622 | 7,39632584 | 13,3741649 | 0,000255114  | 0,001552875 | protein_coding |
| ENSMUSG00000014177  | Fam18b        | family with sequence similarity 18, member B [Source:MGI Symbol;Acc:MGI:1914760]                                      |        |  | 25,21288693 | -0,4908395 | -1,40526231 | 4,64847728 | 8,71725154 | 0,003152129  | 0,013770354 | protein_coding |
| ENSMUSG00000006304  | Arcp2         | actin related protein 2/3 complex, subunit 2 [Source:MGI Symbol;Acc:MGI:1923959]                                      |        |  | 959,9555852 | -0,4908564 | -1,40527881 | 9,90676143 | 6,74244967 | 0,009414526  | 0,034582882 | protein_coding |
| ENSMUSG00000068874  | Selenbp1      | selenium binding protein 1 [Source:MGI Symbol;Acc:MGI:96825]                                                          |        |  | 17,7918025  | -0,4910455 | -1,40546303 | 4,14293619 | 9,13684354 | 0,000505129  | 0,01134417  | protein_coding |
| ENSMUSG00000035696  | Rnf38         | ring finger protein 38 [Source:MGI Symbol;Acc:MGI:1920719]                                                            |        |  | 67,95654411 | -0,4912293 | -1,40564207 | 6,08482696 | 13,6596904 | 0,000219108  | 0,001356245 | protein_coding |
| ENSMUSG00000032870  | Smap2         | stromal membrane-associated GTPase-activating protein 2 [Source:MGI Symbol;Acc:MGI:1917030]                           |        |  | 120,8401631 | -0,4916743 | -1,40607577 | 6,91486106 | 13,2916666 | 0,000266588  | 0,001611115 | protein_coding |
| ENSMUSG00000000386  | Mx1           | myxovirus (influenza virus) resistance 1 [Source:MGI Symbol;Acc:MGI:97243]                                            |        |  | 38,40475908 | -0,4929383 | -1,40730819 | 5,2731556  | 11,4902955 | 0,000699605  | 0,003766076 | protein_coding |
| ENSMUSG00000025915  | Sgk3          | serum/glucocorticoid regulated kinase 3 [Source:MGI Symbol;Acc:MGI:2182368]                                           |        |  | 54,77513698 | -0,4931693 | -1,40753352 | 5,77514166 | 13,1279699 | 0,00029092   | 0,001740924 | protein_coding |
| ENSMUSG00000025241  | Fyco1         | FYVE and coiled-coil domain containing 1 [Source:MGI Symbol;Acc:MGI:107277]                                           |        |  | 85,09475128 | -0,4932482 | -1,40761053 | 6,40874533 | 14,4352716 | 0,000114506  | 0,000946421 | protein_coding |
| ENSMUSG00000045932  | Iff12         | interferon-induced protein with tetratricopeptide repeats 2 [Source:MGI Symbol;Acc:MGI:99449]                         |        |  | 78,25650819 | -0,4934532 | -1,40781058 | 6,29713113 | 14,7548697 | 0,000122431  | 0,00815241  | protein_coding |
| ENSMUSG00000020101  | 4632428N05Rik | RIKEN cDNA 4632428N05 gene [Source:MGI Symbol;Acc:MGI:1921298]                                                        |        |  | 538,0603231 | -0,4938794 | -1,40822651 | 9,07139725 | 7,96482724 | 0,004769504  | 0,019437145 | protein_coding |
| ENSMUSG00000027236  | Eif3j1        | eukaryotic translation initiation factor 3, subunit J1 [Source:MGI Symbol;Acc:MGI:1925905]                            |        |  | 30,85344774 | -0,4938802 | -1,40822727 | 4,94902482 | 11,630083  | 0,000648937  | 0,003526145 | protein_coding |
| ENSMUSG00000030979  | Uros          | uroporphyrinogen III synthase [Source:MGI Symbol;Acc:MGI:98917]                                                       |        |  | 12,33686313 | -0,4939667 | -1,40831171 | 6,31360685 | 6,03631461 | 0,01401451   | 0,04759735  | protein_coding |
| ENSMUSG00000051768  | Xrcc1         | X-ray repair complementing defective repair in Chinese hamster cells 1 [Source:MGI Symbol;Acc:MGI:99137]              |        |  | 39,45609068 | -0,4940851 | -1,40842734 | 5,29523601 | 12,4835133 | 0,000410559  | 0,00235798  | protein_coding |
| ENSMUSG00000056629  | Fkbp2         | F506 binding protein 2 [Source:MGI Symbol;Acc:MGI:95542]                                                              |        |  | 32,93662438 | -0,4944595 | -1,40879285 | 5,0339208  | 11,923744  | 0,00055423   | 0,003064581 | protein_coding |
| ENSMUSG00000038623  | Tm6sf1        | transmembrane 6 superfamily member 1 [Source:MGI Symbol;Acc:MGI:1933209]                                              |        |  | 125,0778937 | -0,494924  | -1,40924649 | 6,96599549 | 13,7744762 | 0,000206118  | 0,001286713 | protein_coding |
| ENSMUSG00000055897  | Ppp4r1-ps     | protein phosphatase 4, regulatory subunit 1-like, pseudogene [Source:MGI Symbol;Acc:MGI:1924560]                      |        |  | 22,37686727 | -0,4951649 | -1,40948189 | 4,46674841 | 8,81960752 | 0,002980108  | 0,013147669 | pseudogene     |
| ENSMUSG00000004070  | Hmxo2         | heme oxygenase (decycling) 2 [Source:MGI Symbol;Acc:MGI:109373]                                                       |        |  | 161,9307721 | -0,4954228 | -1,40973383 | 7,33828034 | 13,385207  | 0,000253617  | 0,001547188 | protein_coding |
| ENSMUSG00000043998  | Mgat2         | mannoside acetylglucosaminyltransferase 2 [Source:MGI Symbol;Acc:MGI:2384966]                                         |        |  | 91,07771303 | -0,4955553 | -1,4098633  | 6,50777885 | 12,2688729 | 0,000460576  | 0,002612469 | protein_coding |
| ENSMUSG00000055541  | Lair1         | leukocyte-associated Ig-like receptor 1 [Source:MGI Symbol;Acc:MGI:105492]                                            |        |  | 108,5932015 | -0,4957531 | -1,41005659 | 6,76069629 | 15,3584655 | 8,89216E-05  | 0,000616004 | protein_coding |
| ENSMUSG00000038058  | Nod1          | nucleotide-binding oligomerization domain containing 1 [Source:MGI Symbol;Acc:MGI:1341839]                            |        |  | 29,08968852 | -0,4964857 | -1,4107728  | 4,87791454 | 11,3334255 | 0,000761244  | 0,004064034 | protein_coding |
| ENSMUSG00000048865  | Arhgap30      | Rho GTPase activating protein 30 [Source:MGI Symbol;Acc:MGI:2684948]                                                  |        |  | 438,1281124 | -0,4970369 | -1,41131194 | 8,77483027 | 9,13552847 | 0,00250693   | 0,01134417  | protein_coding |
| ENSMUSG00000027472  | Pdrg1         | p53 and DNA damage regulated 1 [Source:MGI Symbol;Acc:MGI:1915809]                                                    |        |  | 61,67195567 | -0,4977988 | -1,41205748 | 5,94359544 | 12,9789418 | 0,000315014  | 0,0018658   | protein_coding |
| ENSMUSG00000004451  | Ralb          | v-ral simian leukemia viral oncogene homolog B (ras related) [Source:MGI Symbol;Acc:MGI:1927244]                      |        |  | 101,1937766 | -0,4981369 | -1,4123884  | 6,65923478 | 13,7919538 | 0,000204209  | 0,001276411 | protein_coding |
| ENSMUSG00000004446  | Bid           | BH3 interacting domain death agonist [Source:MGI Symbol;Acc:MGI:108093]                                               |        |  | 60,27821268 | -0,4983085 | -1,41255639 | 5,91112826 | 12,2875741 | 0,000458188  | 0,00260161  | protein_coding |
| ENSMUSG00000030681  | Mvp           | major vault protein [Source:MGI Symbol;Acc:MGI:1925638]                                                               |        |  | 372,6316249 | -0,4983425 | -1,41258971 | 8,54141446 | 10,0179445 | 0,001550224  | 0,007526429 | protein_coding |
| ENSMUSG00000024642  | Tie4          | transducin-like enhancer of split 4, homolog of Drosophila E(spl) [Source:MGI Symbol;Acc:MGI:104633]                  |        |  | 98,42978458 | -0,4983693 | -1,41261595 | 6,62105611 | 14,0704853 | 0,000176085  | 0,001120237 | protein_coding |
| ENSMUSG00000021252  | 0610007P14Rik | RIKEN cDNA 0610007P14 gene [Source:MGI Symbol;Acc:MGI:1915571]                                                        |        |  | 28,8099619  | -0,4992722 | -1,4135003  | 4,83880537 | 6,97689368 | 0,000825688  | 0,030951329 | protein_coding |
| ENSMUSG00000041992  | Rapgef5       | Rap guanine nucleotide exchange factor (GEF) 5 [Source:MGI Symbol;Acc:MGI:2444365]                                    |        |  | 228,754809  | -0,4996081 | -1,41382946 | 7,83775018 | 12,190334  | 0,000480378  | 0,002712735 | protein_coding |
| ENSMUSG00000050786  | Cdccl126      | coiled-coil domain containing 126 [Source:MGI Symbol;Acc:MGI:1889376]                                                 |        |  | 13,29912015 | -0,4998083 | -1,41402567 | 3,71754398 | 6,04928984 | 0,013911971  | 0,047336621 | protein_coding |
| ENSMUSG00000008475  | Arcp5         | actin related protein 2/3 complex, subunit 5 [Source:MGI Symbol;Acc:MGI:1915021]                                      |        |  | 775,4649963 | -0,5002174 | -1,41424667 | 9,59888469 | 7,56212126 | 0,005986079  | 0,023532547 | protein_coding |
| ENSMUSG00000008823  | Znf512b       | zinc finger protein 512B [Source:MGI Symbol;Acc:MGI:2685478]                                                          |        |  | 44,02048385 | -0,500451  | -1,41465577 | 5,45077569 | 11,8249389 | 0,000584426  | 0,003215369 | protein_coding |
| ENSMUSG00000033326  | Kdm4a         | lysine (K)-specific demethylase 4A [Source:MGI Symbol;Acc:MGI:2446210]                                                |        |  | 109,7659168 | -0,5005536 | -1,41475629 | 6,7747041  | 13,8062114 | 0,000202665  | 0,001268042 | protein_coding |
| ENSMUSG00000024038  | Ndufv3        | NADH dehydrogenase (ubiquinone) flavoprotein 3 [Source:MGI Symbol;Acc:MGI:1890894]                                    |        |  | 54,68068851 | -0,5010689 | -1,41526176 | 5,76997817 | 13,6237009 | 0,000223348  | 0,001377835 | protein_coding |
| ENSMUSG00000018750  | Zbtb4         | zinc finger and BTB domain containing 4 [Source:MGI Symbol;Acc:MGI:1922830]                                           |        |  | 127,6415661 | -0,5013326 | -1,41552041 | 6,99422194 | 14,6749649 | 0,000127732  | 0,000846434 | protein_coding |
| ENSMUSG00000022265  | Ank           |                                                                                                                       |        |  |             |            |             |            |            |              |             |                |

| Gene                | Symbol   | Description                                                                                                         | Score | Value1       | Value2     | Value3             | Value4     | Value5     | Value6      | Value7       | Value8         | Value9 | Value10 | Type |
|---------------------|----------|---------------------------------------------------------------------------------------------------------------------|-------|--------------|------------|--------------------|------------|------------|-------------|--------------|----------------|--------|---------|------|
| ENSMUSG00000043716  | Rpl7     | ribosomal protein L7 [Source:MGI Symbol;Acc:MGI:98073]                                                              |       | 569,2593234  | -0,5023511 | <b>-1,41652015</b> | 9,15268927 | 8,06015123 | 0,004524941 | 0,018620046  | protein_coding |        |         |      |
| ENSMUSG00000029434  | Vps33a   | vacuolar protein sorting 33A (yeast) [Source:MGI Symbol;Acc:MGI:1924823]                                            |       | 178,7142484  | -0,5029491 | <b>-1,41710735</b> | 7,48089269 | 14,1137542 | 0,000172081 | 0,001096031  | protein_coding |        |         |      |
| ENSMUSG00000017561  | Crf3     | cytokine receptor-like factor 3 [Source:MGI Symbol;Acc:MGI:1860086]                                                 |       | 98,52185363  | -0,5032313 | <b>-1,41738462</b> | 6,62346094 | 14,5856595 | 0,00013393  | 0,000881658  | protein_coding |        |         |      |
| ENSMUSG00000034801  | Sos2     | son of sevenless homolog 2 (Drosophila) [Source:MGI Symbol;Acc:MGI:98355]                                           |       | 75,17127734  | -0,5044893 | <b>-1,41862113</b> | 6,23065014 | 13,8557349 | 0,000197393 | 0,001237171  | protein_coding |        |         |      |
| ENSMUSG00000032570  | Atp2c1   | ATPase, Ca++-sequestering [Source:MGI Symbol;Acc:MGI:1889008]                                                       |       | 132,1933603  | -0,5061795 | <b>-1,4202841</b>  | 7,04701517 | 14,0163468 | 0,000181228 | 0,001149627  | protein_coding |        |         |      |
| ENSMUSG00000020460  | Rps27a   | ribosomal protein S27A [Source:MGI Symbol;Acc:MGI:1925544]                                                          |       | 334,5609956  | -0,5062338 | <b>-1,42033751</b> | 8,38566542 | 10,1063792 | 0,001477557 | 0,007199997  | protein_coding |        |         |      |
| ENSMUSG00000029171  | Pgm1     | phosphoglucosyltransferase 1 [Source:MGI Symbol;Acc:MGI:97564]                                                      |       | 48,99467617  | -0,5072434 | <b>-1,42133181</b> | 5,61247451 | 13,0883977 | 0,00029713  | 0,001772297  | protein_coding |        |         |      |
| ENSMUSG00000051557  | Pus1     | pseudouridylyltransferase-like 1 [Source:MGI Symbol;Acc:MGI:3047787]                                                |       | 12,55433855  | -0,5074579 | <b>-1,42154319</b> | 3,62953053 | 6,43251668 | 0,01120497  | 0,039905675  | protein_coding |        |         |      |
| ENSMUSG00000034330  | Plcg2    | phospholipase C, gamma 2 [Source:MGI Symbol;Acc:MGI:97616]                                                          |       | 246,9912293  | -0,5075107 | <b>-1,42159515</b> | 7,94729473 | 11,9051947 | 0,00055979  | 0,003092212  | protein_coding |        |         |      |
| ENSMUSG00000030447  | Cyfp1    | cytoplasmic FMR1 interacting protein 1 [Source:MGI Symbol;Acc:MGI:1338801]                                          |       | 974,2476623  | -0,5077027 | <b>-1,42178443</b> | 9,92821583 | 7,25846056 | 0,007056776 | 0,027109369  | protein_coding |        |         |      |
| ENSMUSG00000060803  | Gstp1    | glutathione S-transferase, pi 1 [Source:MGI Symbol;Acc:MGI:95865]                                                   |       | 22,24669136  | -0,5079238 | <b>-1,42200234</b> | 4,47258494 | 9,29826139 | 0,002293714 | 0,010528402  | protein_coding |        |         |      |
| ENSMUSG00000097830  |          |                                                                                                                     |       | 22,24669136  | -0,5079245 | <b>-1,42200296</b> | 4,47258503 | 9,29797393 | 0,002294074 | 0,010528402  | protein_coding |        |         |      |
| ENSMUSG00000059447  | Hadhb    | hydroxyacyl-Coenzyme A dehydrogenase/3-ketoacyl-Coenzyme A thiolase/enoyl-Coenzyme A hydratase (trifunctional p     |       | 75,51841525  | -0,5081432 | <b>-1,42221855</b> | 6,23911087 | 15,3666565 | 8,85369E-05 | 0,000613726  | protein_coding |        |         |      |
| ENSMUSG00000028163  | Nfkb1    | nuclear factor of kappa light polypeptide gene enhancer in B cells 1, p105 [Source:MGI Symbol;Acc:MGI:97312]        |       | 138,6976745  | -0,5082177 | <b>-1,42229198</b> | 7,11589913 | 13,3652915 | 0,000256324 | 0,001556031  | protein_coding |        |         |      |
| ENSMUSG00000028669  | Pithd1   | PITH (C-terminal proteasome-interacting domain of thioredoxin-like) domain containing 1 [Source:MGI Symbol;Acc:MGI: |       | 19,38756768  | -0,5082725 | <b>-1,42234607</b> | 4,26706534 | 8,3935784  | 0,003765489 | 0,016031859  | protein_coding |        |         |      |
| ENSMUSG000000028573 | Fggy     | FGGY carboxylate kinase domain containing [Source:MGI Symbol;Acc:MGI:1922282]                                       |       | 17,3977291   | -0,5083466 | <b>-1,42241912</b> | 4,12002435 | 9,68690553 | 0,001858558 | 0,008084108  | protein_coding |        |         |      |
| ENSMUSG00000053332  | Gas5     | growth arrest specific 5 [Source:MGI Symbol;Acc:MGI:95659]                                                          |       | 97,51913315  | -0,5084305 | <b>-1,42250178</b> | 6,60412444 | 14,5244523 | 0,000138352 | 0,000906425  | non_coding     |        |         |      |
| ENSMUSG00000087107  | Al662270 | expressed sequence Al662270 [Source:MGI Symbol;Acc:MGI:2144254]                                                     |       | 83,75413538  | -0,5088131 | <b>-1,42287907</b> | 6,38713715 | 14,8409063 | 0,000116971 | 0,000782678  | lincRNA        |        |         |      |
| ENSMUSG00000058835  | Abi1     | abl-interactor 1 [Source:MGI Symbol;Acc:MGI:104913]                                                                 |       | 367,2126963  | -0,5093006 | <b>-1,42336002</b> | 8,52024132 | 10,6077008 | 0,000126176 | 0,005675826  | protein_coding |        |         |      |
| ENSMUSG000000021816 | Ppp3cb   | protein phosphatase 3, catalytic subunit, beta isoform [Source:MGI Symbol;Acc:MGI:107163]                           |       | 862,79697957 | -0,5097818 | <b>-1,42338485</b> | 6,37064589 | 14,7096586 | 0,000125402 | 0,000833008  | protein_coding |        |         |      |
| ENSMUSG000000025794 | Rpl14    | ribosomal protein L14 [Source:MGI Symbol;Acc:MGI:1914365]                                                           |       | 398,1453647  | -0,5101890 | <b>-1,42492955</b> | 8,63640172 | 9,70125809 | 0,001841419 | 0,008754509  | protein_coding |        |         |      |
| ENSMUSG000000022680 | Pdx1     | pyridoxal-dependent decarboxylase domain containing 1 [Source:MGI Symbol;Acc:MGI:1920909]                           |       | 158,4858134  | -0,5112721 | <b>-1,42530533</b> | 7,30743477 | 14,6021762 | 0,000132761 | 0,0008375538 | protein_coding |        |         |      |
| ENSMUSG00000056724  | Nbeal2   | neurobeachin-like 2 [Source:MGI Symbol;Acc:MGI:2448554]                                                             |       | 76,37396659  | -0,5115874 | <b>-1,42561799</b> | 6,24772037 | 15,0446366 | 0,000104998 | 0,00071123   | protein_coding |        |         |      |
| ENSMUSG00000060519  | Tor3a    | torsin family 3, member A [Source:MGI Symbol;Acc:MGI:1353652]                                                       |       | 207,1712109  | -0,5118295 | <b>-1,42585717</b> | 7,69350932 | 13,6857958 | 0,000216082 | 0,001339599  | protein_coding |        |         |      |
| ENSMUSG000000023032 | Papps1   | 3'-phosphoadenosine 5'-phosphosulfate synthase 1 [Source:MGI Symbol;Acc:MGI:1330587]                                |       | 31,89970121  | -0,5121772 | <b>-1,42620088</b> | 4,98858163 | 10,4051257 | 0,00125666  | 0,006244651  | protein_coding |        |         |      |
| ENSMUSG00000081406  | Rps6-ps4 | ribosomal protein S6, pseudogene 4 [Source:MGI Symbol;Acc:MGI:3650907]                                              |       | 780,1865327  | -0,5125963 | <b>-1,4266153</b>  | 9,60754659 | 7,66888122 | 0,005618128 | 0,022372734  | pseudogene     |        |         |      |
| ENSMUSG000000026791 | Slc2a8   | solute carrier family 2, (facilitated glucose transporter), member 8 [Source:MGI Symbol;Acc:MGI:1860103]            |       | 15,6303119   | -0,512804  | <b>-1,42682067</b> | 3,95090426 | 8,53466899 | 0,003484447 | 0,015019074  | protein_coding |        |         |      |
| ENSMUSG000000038991 | Txnrc5   | thioredoxin domain containing 5 [Source:MGI Symbol;Acc:MGI:2145316]                                                 |       | 127,6727876  | -0,5131545 | <b>-1,42716732</b> | 6,99525847 | 14,2167655 | 0,000162913 | 0,001047963  | protein_coding |        |         |      |
| ENSMUSG000000002107 | Celf2    | CUGBP, Elav-like family member 2 [Source:MGI Symbol;Acc:MGI:1338822]                                                |       | 177,9640168  | -0,5131592 | <b>-1,42717197</b> | 7,47438041 | 14,2525839 | 0,000159841 | 0,001030619  | protein_coding |        |         |      |
| ENSMUSG000000018548 | Trim37   | tripartite motif-containing 37 [Source:MGI Symbol;Acc:MGI:2153072]                                                  |       | 29,44440694  | -0,5133884 | <b>-1,42739436</b> | 4,87758722 | 12,139832  | 0,000493562 | 0,002772376  | protein_coding |        |         |      |
| ENSMUSG00000032741  | Tpcn1    | two pore channel 1 [Source:MGI Symbol;Acc:MGI:2182472]                                                              |       | 172,8239289  | -0,5144167 | <b>-1,4284165</b>  | 7,43062882 | 15,1362438 | 0,000100024 | 0,000680897  | protein_coding |        |         |      |
| ENSMUSG00000012405  | Rpl15    | ribosomal protein L15 [Source:MGI Symbol;Acc:MGI:1913730]                                                           |       | 100,6715473  | -0,5144892 | <b>-1,4284883</b>  | 6,65382478 | 16,7437287 | 4,27834E-05 | 0,000318254  | protein_coding |        |         |      |
| ENSMUSG000000021371 | Cdc90a   | coiled-coil domain containing 90A [Source:MGI Symbol;Acc:MGI:1923387]                                               |       | 79,40913989  | -0,5146281 | <b>-1,42862584</b> | 6,30981521 | 14,9197467 | 0,000112183 | 0,000754315  | protein_coding |        |         |      |
| ENSMUSG000000024431 | Nr3c1    | nuclear receptor subfamily 3, group C, member 1 [Source:MGI Symbol;Acc:MGI:95824]                                   |       | 140,1807506  | -0,5148293 | <b>-1,42882505</b> | 7,13019596 | 14,9914714 | 0,000107998 | 0,000728855  | protein_coding |        |         |      |
| ENSMUSG000000062082 | Cd200r4  | CD200 receptor 4 [Source:MGI Symbol;Acc:MGI:3036289]                                                                |       | 34,08295238  | -0,5149191 | <b>-1,42891398</b> | 5,07238942 | 13,275551  | 0,00026889  | 0,001622346  | protein_coding |        |         |      |
| ENSMUSG000000023106 | Denr     | density-regulated protein [Source:MGI Symbol;Acc:MGI:1915434]                                                       |       | 123,7895918  | -0,5149628 | <b>-1,4289573</b>  | 6,95221996 | 13,1525782 | 0,000287124 | 0,001723842  | protein_coding |        |         |      |
| ENSMUSG00000002731  | Prkra    | protein kinase, interferon inducible double stranded RNA dependent activator [Source:MGI Symbol;Acc:MGI:1344375]    |       | 29,3345737   | -0,5150175 | <b>-1,42901143</b> | 4,86847598 | 12,1721261 | 0,00048509  | 0,002734573  | protein_coding |        |         |      |
| ENSMUSG00000044068  | Zrsr1    | zinc finger (CCCH type), RNA binding motif and serine/arginine rich 1 [Source:MGI Symbol;Acc:MGI:98885]             |       | 14,77983765  | -0,5152602 | <b>-1,42925186</b> | 3,87811664 | 8,00408208 | 0,004667202 | 0,019098154  | protein_coding |        |         |      |
| ENSMUSG00000041935  | AW549877 | expressed sequence AW549877 [Source:MGI Symbol;Acc:MGI:2146232]                                                     |       | 73,40202462  | -0,5159646 | <b>-1,42994993</b> | 6,19694062 | 15,0286958 | 0,000105889 | 0,000716574  | protein_coding |        |         |      |
| ENSMUSG000000037503 | Fam168b  | family with sequence similarity 168, member B [Source:MGI Symbol;Acc:MGI:2448487]                                   |       | 215,4530308  | -0,5160776 | <b>-1,43006186</b> | 7,75033222 | 13,4279328 | 0,000247905 | 0,001514869  | protein_coding |        |         |      |
| ENSMUSG000000042167 | Papd4    | PAP associated domain containing 4 [Source:MGI Symbol;Acc:MGI:2140950]                                              |       | 75,65912616  | -0,5164457 | <b>-1,43042684</b> | 6,23930356 | 15,6283862 | 7,70886E-05 | 0,005543628  | protein_coding |        |         |      |
| ENSMUSG000000073455 | Gm3435   | predicted gene 3435 [Source:MGI Symbol;Acc:MGI:3810125]                                                             |       | 12,5223364   | -0,5166274 | <b>-1,43060696</b> | 3,62944255 | 6,80569    | 0,009086763 | 0,033592358  | protein_coding |        |         |      |
| ENSMUSG000000034744 | Nagk     | N-acetylglucosaminase kinase [Source:MGI Symbol;Acc:MGI:1860418]                                                    |       | 75,61537414  | -0,5169578 | <b>-1,43093465</b> | 6,23715722 | 15,5878441 | 7,87593E-05 | 0,000554342  | protein_coding |        |         |      |
| ENSMUSG000000042462 | Dctpp1   | dCTP pyrophosphatase 1 [Source:MGI Symbol;Acc:MGI:1913672]                                                          |       | 12,66842253  | -0,5175011 | <b>-1,43147365</b> | 3,66004135 | 6,30810851 | 0,0120187   | 0,042255824  | protein_coding |        |         |      |
| ENSMUSG000000026393 | Nek7     | NIMA (never in mitosis gene a)-related expressed kinase 7 [Source:MGI Symbol;Acc:MGI:1890645]                       |       | 119,6512522  | -0,5176072 | <b>-1,43157895</b> | 6,89978181 | 16,1738144 | 5,77874E-05 | 0,000418806  | protein_coding |        |         |      |
| ENSMUSG000000036712 | Cyld     | cylindromatosis (turban tumor syndrome) [Source:MGI Symbol;Acc:MGI:1921506]                                         |       | 77,29785123  | -0,5176449 | <b>-1,43161635</b> | 6,26916323 | 14,2685747 | 0,000158489 | 0,0101225    | protein_coding |        |         |      |
| ENSMUSG000000041650 | Pcca     | propionyl-Coenzyme A carboxylase, alpha polypeptide [Source:MGI Symbol;Acc:MGI:97499]                               |       | 28,5464456   | -0,5181431 | <b>-1,43211083</b> | 4,83376421 | 11,748121  | 0,000609047 | 0,003336054  | protein_coding |        |         |      |
| ENSMUSG000000037470 | Uggt1    | UDP-glucose glycoprotein glucosyltransferase 1 [Source:MGI Symbol;Acc:MGI:2443162]                                  |       | 104,5217014  | -0,5185107 | <b>-1,43247571</b> | 6,70704783 | 17,1353901 | 3,48076E-05 | 0,000265025  | protein_coding |        |         |      |
| ENSMUSG000000038622 | Med30    | mediator complex subunit 30 [Source:MGI Symbol;Acc:MGI:1917040]                                                     |       | 12,84084378  | -0,5190136 | <b>-1,4329752</b>  | 3,67072748 | 7,18580314 | 0,007348265 | 0,028023392  | protein_coding |        |         |      |
| ENSMUSG000000001289 | Pfdn5    | prefoldin 5 [Source:MGI Symbol;Acc:MGI:1928753]                                                                     |       | 108,5043753  | -0,519116  | <b>-1,43307685</b> | 6,75817718 | 15,0952202 | 0,000102222 | 0,000694994  | protein_coding |        |         |      |
| ENSMUSG000000030788 | Rnf141   | ring finger protein 141 [Source:MGI Symbol;Acc:MGI:1914400]                                                         |       | 98,05265726  | -0,5192244 | <b>-1,43318452</b> | 6,61526971 | 12,4312203 | 0,00042222  | 0,00241611   | protein_coding |        |         |      |
| ENSMUSG000000058454 | Dhcr7    | 7-dehydrocholesterol reductase [Source:MGI Symbol;Acc:MGI:1298378]                                                  |       | 26,91948619  | -0,5196042 | <b>-1,43356194</b> | 4,74108365 | 7,04839924 | 0,007933612 | 0,029954156  | protein_coding |        |         |      |
| ENSMUSG000000031539 | Ap3m2    | adaptor-related protein complex 3, mu 2 subunit [Source:MGI Symbol;Acc:MGI:1929214]                                 |       | 25,3025377   | -0,5198733 | <b>-1,43382932</b> | 4,65168266 | 10,4711207 | 0,001212551 | 0,006055592  | protein_coding |        |         |      |
| ENSMUSG000000038872 | Zfx3     | zinc finger homeobox 3 [Source:MGI Symbol;Acc:MGI:99948]                                                            |       | 68,36012778  | -0,5200638 | <b>-1,43401868</b> | 6,08590749 | 14,241245  | 0,000160807 | 0,001035232  | protein_coding |        |         |      |
| ENSMUSG000000024516 | Sec11c   | SEC11 homolog C (S. cerevisiae) [Source:MGI Symbol;Acc:MGI:1913536]                                                 |       | 90,53946698  | -0,5201994 | <b>-1,43415343</b> | 6,49667587 | 15,952451  | 6,49536E-05 | 0,00046613   | protein_coding |        |         |      |
| ENSMUSG000000029482 | Aacs     | acetoacetyl-CoA synthetase [Source:MGI Symbol;Acc:MGI:1926144]                                                      |       | 44,32808147  | -0,5202622 | <b>-1,43421588</b> | 5,45737357 | 9,76325786 | 0,001780341 | 0,00851943   | protein_coding |        |         |      |
| ENSMUSG000000018293 | Pfn1     | profilin 1 [Source:MGI Symbol;Acc:MGI:97549]                                                                        |       | 1470,829479  | -0,5203756 | <b>-1,43432865</b> | 10,5223319 | 6,34462426 | 0,011773755 | 0,04158092   | protein_coding |        |         |      |
| ENSMUSG000000044477 | Zfand3   | zinc finger, AN1-type domain 3 [Source:MGI Symbol;Acc:MGI:1096572]                                                  |       | 111,5539246  | -0,5204289 | <b>-1,43438157</b> | 6,79951393 | 14,5740154 | 0,00013476  | 0,000886062  | protein_coding |        |         |      |
| ENSMUSG000000033016 | Nfatc1   | nuclear factor of activated T cells, cytoplasmic, calcineurin dependent 1 [Source:MGI Symbol;Acc:MGI:102469]        |       | 68,78218643  | -0,5209604 | <b>-1,43491014</b> | 6,09925208 | 14,679482  | 0,000127426 | 0,000844917  | protein_coding |        |         |      |
| ENSMUSG000000050751 | Pgbd5    | piggyBac transposable element derived 5 [Source:MGI Symbol;Acc:MGI:2429955]                                         |       | 18,2853862   | -0,5217919 | <b>-1,43573738</b> | 4,17855091 | 8,43025346 | 0,003690289 | 0,015776345  | protein_coding |        |         |      |
| ENSMUSG000000029528 | Pxn      | paxillin [Source:MGI Symbol;Acc:MGI:108295]                                                                         |       | 203,078551   | -0,5219175 | <b>-1,43586241</b> | 7,66447301 | 12,4720961 | 0,000413076 | 0,002369958  | protein_coding |        |         |      |
| ENSMUSG000000063316 | Rpl27    | ribosomal protein L27 [Source:MGI Symbol;Acc:MGI:98036]                                                             |       | 23,9896086   | -0,5222679 | <b>-1,43621114</b> | 4,59325501 | 11,0506037 | 0,000886583 | 0,           |                |        |         |      |



|                    |               |                                                                                                                                  |        |              |            |             |            |            |             |              |                |
|--------------------|---------------|----------------------------------------------------------------------------------------------------------------------------------|--------|--------------|------------|-------------|------------|------------|-------------|--------------|----------------|
| ENSMUSG00000020484 | Xbp1          | X-box binding protein 1 [Source:MGI Symbol;Acc:MGI:98970]                                                                        | Sheet1 | 135,9762555  | -0,5248174 | -1,43875143 | 7,08698448 | 12,9316607 | 0,000323071 | 0,001907352  | protein_coding |
| ENSMUSG00000063882 | Uqcrh         | ubiquinol-cytochrome c reductase hinge protein [Source:MGI Symbol;Acc:MGI:1913826]                                               |        | 96,21923501  | -0,5252723 | -1,43920515 | 6,5852478  | 14,6107993 | 0,000132155 | 0,000872065  | protein_coding |
| ENSMUSG00000024772 | Ehd1          | EH-domain containing 1 [Source:MGI Symbol;Acc:MGI:1341878]                                                                       |        | 626,5882636  | -0,5252769 | -1,43920979 | 9,29132059 | 8,06878472 | 0,004530343 | 0,018538478  | protein_coding |
| ENSMUSG00000026131 | Dst           | dystonin [Source:MGI Symbol;Acc:MGI:104627]                                                                                      |        | 285,4737963  | -0,525415  | -1,43934756 | 8,15643683 | 12,5669634 | 0,000392626 | 0,000275067  | protein_coding |
| ENSMUSG00000061315 | Naca          | nascent polypeptide-associated complex alpha polypeptide [Source:MGI Symbol;Acc:MGI:106095]                                      |        | 258,3806573  | -0,5265381 | -1,44046853 | 8,01249781 | 13,2709555 | 0,000296902 | 0,001625748  | protein_coding |
| ENSMUSG00000059669 | Taf1b         | TATA box binding protein (Tbp)-associated factor, RNA polymerase I, B [Source:MGI Symbol;Acc:MGI:109577]                         |        | 12,16721477  | -0,5265892 | -1,44051952 | 3,60331858 | 6,95715972 | 0,008348446 | 0,031202134  | protein_coding |
| ENSMUSG00000020585 | Laptm4a       | lysosomal-associated protein transmembrane 4A [Source:MGI Symbol;Acc:MGI:108017]                                                 |        | 540,2409846  | -0,5266498 | -1,44058006 | 9,07727581 | 9,14470258 | 0,002494392 | 0,011310723  | protein_coding |
| ENSMUSG00000028799 | Zfp362        | zinc finger protein 362 [Source:MGI Symbol;Acc:MGI:2652839]                                                                      |        | 33,25682855  | -0,5270971 | -1,44102671 | 5,04655839 | 14,0096965 | 0,00018187  | 0,001153035  | protein_coding |
| ENSMUSG00000074785 | Plxnc1        | plexin C1 [Source:MGI Symbol;Acc:MGI:1890127]                                                                                    |        | 111,6346474  | -0,5271768 | -1,44110634 | 6,9679454  | 16,9635792 | 3,81038E-05 | 0,002875532  | protein_coding |
| ENSMUSG00000028843 | Sh3bglr3      | SH3 domain binding glutamic acid-rich protein-like 3 [Source:MGI Symbol;Acc:MGI:1920973]                                         |        | 591,502144   | -0,527521  | -1,44145018 | 9,20783195 | 9,58621067 | 0,001960441 | 0,009212732  | protein_coding |
| ENSMUSG00000021365 | Nedd9         | neuronal precursor cell expressed, developmentally down-regulated gene 9 [Source:MGI Symbol;Acc:MGI:97302]                       |        | 20,64316188  | -0,5275301 | -1,44145926 | 4,35529853 | 10,5363971 | 0,001170464 | 0,005869413  | protein_coding |
| ENSMUSG00000059355 | BC056474      | cDNA sequence BC056474 [Source:MGI Symbol;Acc:MGI:3041257]                                                                       |        | 50,03933247  | -0,528695  | -1,44262368 | 5,6383703  | 12,4680835 | 0,000413965 | 0,002373815  | protein_coding |
| ENSMUSG00000028081 | Rps3a         | ribosomal protein S3A [Source:MGI Symbol;Acc:MGI:1202063]                                                                        |        | 692,3119143  | -0,5287457 | -1,4426744  | 9,43512025 | 8,86156648 | 0,002912375 | 0,01288175   | protein_coding |
| ENSMUSG00000033767 | D930015E06Rik | RIKEN cDNA D930015E06 gene [Source:MGI Symbol;Acc:MGI:2443399]                                                                   |        | 42,26877593  | -0,5289185 | -1,44284714 | 5,39597683 | 12,6621885 | 0,000373125 | 0,002172172  | protein_coding |
| ENSMUSG00000007833 | Aldh16a1      | aldehyde dehydrogenase 16 family, member A1 [Source:MGI Symbol;Acc:MGI:1916998]                                                  |        | 64,16029908  | -0,5303563 | -1,44428583 | 5,99766273 | 14,5015114 | 0,000140047 | 0,000916437  | protein_coding |
| ENSMUSG00000073616 | Myeov2        | myeloma overexpressed 2 [Source:MGI Symbol;Acc:MGI:1914165]                                                                      |        | 48,65721198  | -0,5303899 | -1,44431945 | 5,59913505 | 14,903708  | 0,00011314  | 0,00076029   | protein_coding |
| ENSMUSG00000038615 | Nfe2l1        | nuclear factor, erythroid derived 2,-like 1 [Source:MGI Symbol;Acc:MGI:99421]                                                    |        | 437,21161306 | -0,5304584 | -1,44438802 | 8,7717366  | 8,95835895 | 0,002762029 | 0,012305925  | protein_coding |
| ENSMUSG00000041362 | 4930506M07Rik | RIKEN cDNA 4930506M07 gene [Source:MGI Symbol;Acc:MGI:1918903]                                                                   |        | 247,2404494  | -0,5306868 | -1,4446167  | 7,94917197 | 13,6889562 | 0,000215719 | 0,001339044  | protein_coding |
| ENSMUSG00000032249 | Anp32a        | acidic (leucine-rich) nuclear phosphoprotein 32 family, member A [Source:MGI Symbol;Acc:MGI:108447]                              |        | 174,3792577  | -0,5307035 | -1,44463351 | 7,44583136 | 14,5959887 | 0,000133198 | 0,000877789  | protein_coding |
| ENSMUSG00000054277 | Arfgap3       | ADP-ribosylation factor GTPase activating protein 3 [Source:MGI Symbol;Acc:MGI:1913501]                                          |        | 39,32567201  | -0,5313065 | -1,44523736 | 5,29086368 | 13,3658662 | 0,000256246 | 0,001558031  | protein_coding |
| ENSMUSG00000019370 | Calm3         | calmodulin 3 [Source:MGI Symbol;Acc:MGI:103249]                                                                                  |        | 279,4707183  | -0,5314343 | -1,44536539 | 8,12572717 | 12,7501647 | 0,000355978 | 0,002082603  | protein_coding |
| ENSMUSG00000030432 | Rpl28         | ribosomal protein L28 [Source:MGI Symbol;Acc:MGI:101839]                                                                         |        | 47,44237563  | -0,5318093 | -1,44574116 | 5,56119611 | 12,5539718 | 0,000395365 | 0,002285048  | protein_coding |
| ENSMUSG00000057858 | D19Erd737e    | DNA segment, Chr 19, ERATO Doi 737, expressed [Source:MGI Symbol;Acc:MGI:1289174]                                                |        | 14,62620435  | -0,5320954 | -1,4460279  | 3,86662321 | 8,1397128  | 0,004330614 | 0,017961668  | protein_coding |
| ENSMUSG00000046229 | Scand1        | SCAN domain-containing 1 [Source:MGI Symbol;Acc:MGI:1343132]                                                                     |        | 39,84074855  | -0,5321753 | -1,44610798 | 5,30074497 | 13,6046671 | 0,000225624 | 0,001391094  | protein_coding |
| ENSMUSG0000005182  | Skap2         | src family associated phosphoprotein 2 [Source:MGI Symbol;Acc:MGI:1889206]                                                       |        | 262,1506766  | -0,5325686 | -1,44650231 | 8,03358831 | 13,3136943 | 0,000263475 | 0,001595809  | protein_coding |
| ENSMUSG00000024193 | Phf1          | PHD finger protein 1 [Source:MGI Symbol;Acc:MGI:98647]                                                                           |        | 20,06356306  | -0,5333949 | -1,44733096 | 4,31012789 | 10,2134354 | 0,001394212 | 0,006836099  | protein_coding |
| ENSMUSG00000086130 | Gm16211       | predicted gene 16211 [Source:MGI Symbol;Acc:MGI:3802078]                                                                         |        | 33,09411675  | -0,5341553 | -1,44809408 | 5,04792105 | 12,2237316 | 0,000471855 | 0,002672302  | lincRNA        |
| ENSMUSG00000033706 | Smyd5         | SET and MYND domain containing 5 [Source:MGI Symbol;Acc:MGI:108048]                                                              |        | 75,81580518  | -0,5358775 | -1,44982367 | 6,2422219  | 15,5448235 | 8,0572E-05  | 0,000563491  | protein_coding |
| ENSMUSG00000020246 | Hcf2c         | host cell factor C2 [Source:MGI Symbol;Acc:MGI:1915183]                                                                          |        | 35,7057071   | -0,5373098 | -1,45126378 | 5,15758422 | 13,1002369 | 0,000295258 | 0,001763046  | protein_coding |
| ENSMUSG00000047248 | C2cd3         | C2 calcium-dependent domain containing 3 [Source:MGI Symbol;Acc:MGI:2142166]                                                     |        | 31,11213575  | -0,5376088 | -1,45156465 | 4,95465888 | 13,1855379 | 0,000282118 | 0,001695639  | protein_coding |
| ENSMUSG00000025137 | Pcyt2         | phosphate cytidylyltransferase 2, ethanolamine [Source:MGI Symbol;Acc:MGI:1915921]                                               |        | 36,99110832  | -0,5377092 | -1,45166563 | 5,19692202 | 9,0353969  | 0,002648016 | 0,011876788  | protein_coding |
| ENSMUSG00000020827 | Mink1         | misshapen-like kinase 1 (zebrafish) [Source:MGI Symbol;Acc:MGI:1355329]                                                          |        | 120,2351246  | -0,5377692 | -1,45172598 | 7,71280024 | 15,5799394 | 7,90893E-05 | 0,000555484  | protein_coding |
| ENSMUSG00000024965 | Fermf3        | fermitin family homolog 3 (Drosophila) [Source:MGI Symbol;Acc:MGI:2147790]                                                       |        | 617,0769853  | -0,5383322 | -1,45229266 | 9,26895593 | 9,59105963 | 0,001695639 | 0,009196301  | protein_coding |
| ENSMUSG00000006526 | Tmem110       | transmembrane protein 110 [Source:MGI Symbol;Acc:MGI:1921500]                                                                    |        | 16,57610852  | -0,5395708 | -1,45354004 | 4,03850979 | 10,2642414 | 0,001356335 | 0,006882535  | protein_coding |
| ENSMUSG00000031924 | Cyb5b         | cytochrome b5 type B [Source:MGI Symbol;Acc:MGI:1913677]                                                                         |        | 204,3425156  | -0,5398617 | -1,45383315 | 6,7420443  | 12,1446737 | 0,000492283 | 0,002766603  | protein_coding |
| ENSMUSG00000019998 | Stx7          | syntaxin 7 [Source:MGI Symbol;Acc:MGI:1858210]                                                                                   |        | 194,1128097  | -0,5402935 | -1,45426838 | 7,60063826 | 14,3999392 | 0,00147807  | 0,000960353  | protein_coding |
| ENSMUSG00000008683 | Rps15a        | ribosomal protein S15A [Source:MGI Symbol;Acc:MGI:2389091]                                                                       |        | 360,0135609  | -0,5403261 | -1,45430119 | 8,49127095 | 11,7102218 | 0,000621577 | 0,003394268  | protein_coding |
| ENSMUSG00000027133 | Nop10         | NOP10 ribonucleoprotein homolog (yeast) [Source:MGI Symbol;Acc:MGI:1913431]                                                      |        | 32,83262752  | -0,5407979 | -1,45477686 | 5,03479075 | 10,7608103 | 0,00103672  | 0,000292956  | protein_coding |
| ENSMUSG00000002733 | Plekha3       | pleckstrin homology domain-containing, family A (phosphoinositide binding specific) member 3 [Source:MGI Symbol;Acc:MGI:1345153] |        | 63,58378209  | -0,5410621 | -1,45504331 | 5,98888728 | 16,2208625 | 5,63699E-05 | 0,000410156  | protein_coding |
| ENSMUSG00000016664 | Pascin2       | protein kinase C and casein kinase substrate in neurons 2 [Source:MGI Symbol;Acc:MGI:1345153]                                    |        | 159,5972604  | -0,5412846 | -1,45526774 | 7,31750156 | 16,2192221 | 5,64575E-05 | 0,000410522  | protein_coding |
| ENSMUSG00000022351 | Sqle          | squalene epoxidase [Source:MGI Symbol;Acc:MGI:109296]                                                                            |        | 50,44905484  | -0,5413129 | -1,45529625 | 5,65081025 | 6,79996917 | 0,009117339 | 0,0033660013 | protein_coding |
| ENSMUSG00000028207 | Asph          | aspartate-beta-hydroxylase [Source:MGI Symbol;Acc:MGI:1914186]                                                                   |        | 246,6278679  | -0,5416407 | -1,45562699 | 7,94580212 | 14,7644264 | 0,000121812 | 0,000812597  | protein_coding |
| ENSMUSG00000031824 | 6430548M08Rik | RIKEN cDNA 6430548M08 gene [Source:MGI Symbol;Acc:MGI:2443793]                                                                   |        | 61,44722941  | -0,5416566 | -1,45564244 | 5,93712191 | 15,4680695 | 8,39109E-05 | 0,000585351  | protein_coding |
| ENSMUSG00000045896 | Paip2b        | poly(A) binding protein interacting protein 2B [Source:MGI Symbol;Acc:MGI:2386865]                                               |        | 121,72615767 | -0,5425396 | -1,45653419 | 4,44178561 | 11,0046189 | 0,000908851 | 0,004725768  | protein_coding |
| ENSMUSG00000050299 | Gm9843        | predicted gene 9843 [Source:MGI Symbol;Acc:MGI:3708621]                                                                          |        | 447,4450765  | -0,5426203 | -1,45661574 | 8,80449827 | 10,0122273 | 0,001550543 | 0,007543162  | protein_coding |
| ENSMUSG00000027346 | Gpcpd1        | glycerophosphocholine phosphodiesterase GDE1 homolog (S. cerevisiae) [Source:MGI Symbol;Acc:MGI:104898]                          |        | 42,50860971  | -0,5428602 | -1,45477686 | 5,40381876 | 15,5501752 | 8,03442E-05 | 0,000562256  | protein_coding |
| ENSMUSG00000020064 | Herc4         | hect domain and RLD 4 [Source:MGI Symbol;Acc:MGI:1914595]                                                                        |        | 102,2803981  | -0,5430178 | -1,45701709 | 6,67525031 | 15,0745398 | 0,000103348 | 0,000702216  | protein_coding |
| ENSMUSG00000046020 | Pofut1        | protein O-fucosyltransferase 1 [Source:MGI Symbol;Acc:MGI:2153207]                                                               |        | 83,33534048  | -0,5433013 | -1,4573034  | 6,37782419 | 14,7903718 | 0,000120147 | 0,000802468  | protein_coding |
| ENSMUSG00000034574 | Daam1         | dishevelled associated activator of morphogenesis 1 [Source:MGI Symbol;Acc:MGI:1914599]                                          |        | 68,28320352  | -0,5448641 | -1,45888296 | 6,09035421 | 15,9948346 | 6,35155E-05 | 0,000457004  | protein_coding |
| ENSMUSG00000078886 | Gm2026        | predicted gene 2026 [Source:MGI Symbol;Acc:MGI:3780195]                                                                          |        | 13,74560203  | -0,5452891 | -1,45931278 | 3,7666623  | 7,99105785 | 0,004700894 | 0,019214555  | protein_coding |
| ENSMUSG00000027806 | Tsc2d2        | TSC22 domain family, member 2 [Source:MGI Symbol;Acc:MGI:1919283]                                                                |        | 106,1868254  | -0,5457621 | -1,45979125 | 6,2751426  | 13,2024271 | 0,000279587 | 0,001682267  | protein_coding |
| ENSMUSG00000034858 | BC031353      | cDNA sequence BC031353 [Source:MGI Symbol;Acc:MGI:2387648]                                                                       |        | 16,01409995  | -0,5465781 | -1,45981756 | 3,98707198 | 9,27211387 | 0,00232669  | 0,010664725  | protein_coding |
| ENSMUSG00000039450 | Dcxr          | dicarboxyl-L-xylose reductase [Source:MGI Symbol;Acc:MGI:1915130]                                                                |        | 35,17464373  | -0,5458122 | -1,45984199 | 5,12774506 | 13,5611743 | 0,000230913 | 0,001419718  | protein_coding |
| ENSMUSG00000039307 | Hxdc          | hexosaminidase (glycosyl hydrolase family 20, catalytic domain) containing [Source:MGI Symbol;Acc:MGI:3605542]                   |        | 111,5719716  | -0,546177  | -1,46021119 | 6,80221364 | 15,8617303 | 6,81428E-05 | 0,000485529  | protein_coding |
| ENSMUSG00000037795 | N4bp2         | NEDD4 binding protein 2 [Source:MGI Symbol;Acc:MGI:2684414]                                                                      |        | 23,2770908   | -0,5461858 | -1,46022001 | 4,53471009 | 11,0061938 | 0,000908079 | 0,00472399   | protein_coding |
| ENSMUSG00000059734 | Ndufs8        | NADH dehydrogenase (ubiquinone) Fe-S protein 8 [Source:MGI Symbol;Acc:MGI:2385079]                                               |        | 30,13858062  | -0,5473693 | -1,46114845 | 4,90007996 | 13,3339169 | 0,000260649 | 0,001581306  | protein_coding |
| ENSMUSG00000036339 | 6720456H20Rik | RIKEN cDNA 6720456H20 gene [Source:MGI Symbol;Acc:MGI:2443219]                                                                   |        | 25,07750103  | -0,5481838 | -1,46224378 | 4,63912185 | 10,8148254 | 0,001069005 | 0,005164737  | protein_coding |
| ENSMUSG00000019927 | Ube2d1        | ubiquitin-conjugating enzyme E2D 1 [Source:MGI Symbol;Acc:MGI:2384911]                                                           |        | 21,4035332   | -0,5485627 | -1,46262781 | 4,41313765 | 9,60700383 | 0,001938366 | 0,009128518  | protein_coding |
| ENSMUSG00000028894 | Inpp5b        | inositol polyphosphate-5-phosphatase B [Source:MGI Symbol;Acc:MGI:103257]                                                        |        | 96,07707563  | -0,5493537 | -1,46342998 | 6,58649634 | 15,6691565 | 7,54445E-05 | 0,000533403  | protein_coding |
| ENSMUSG00000006132 | Blink         | B cell linker [Source:MGI Symbol;Acc:MGI:96878]                                                                                  |        | 251,1520812  | -0,5496435 | -1,46372394 | 7,97137169 | 14,9199112 | 0,000112173 | 0,000754315  | protein_coding |
| ENSMUSG00000036672 | Cenp1         | centromere protein T [Source:MGI Symbol;Acc:MGI:2443939]                                                                         |        | 18,48130464  | -0,549722  | -1,46380364 | 4,1994952  | 8,97135697 | 0,002742448 | 0,012228604  | protein_coding |
| ENSMUSG00000022361 | Zhx1          | zinc fingers and homeoboxes 1 [Source:MGI Symbol;Acc:MGI:109271]                                                                 |        | 66,07691072  | -0,5502543 | -1,46434378 | 6,04246613 | 17,3132115 | 3,16975E-05 | 0,000244222  | protein_coding |
| ENSMUSG00000007603 | Dus3l         | dihydrouridine synthase 3-like (S. cerevisiae) [Source:MGI Symbol;Acc:MGI:2147092]                                               |        | 33,92787106  | -0,5506605 | -1,46475617 | 5,07317162 | 13,3717251 | 0,000255446 | 0,001554036  | protein_coding |
| ENSMUSG00000042106 | 6230427J02Rik | RIKEN cDNA 6230427J02 gene [Source:MGI Symbol;Acc:MGI:1915426]                                                                   |        | 12,7786245   | -0,5507113 | -1,46480777 | 3,66296232 | 7,21510894 | 0,002729243 | 0,027665513  | protein_coding |
| ENSMUSG00000020476 | Dbnl          | drebrin-like [Source:MGI Symbol;Acc:MGI:700006]                                                                                  |        | 144,3190015  | -0,5519657 | -1,46608192 | 7,1717144  | 16,2603124 | 5,52083E-05 | 0,000403307  | protein_coding |
| ENSMUSG00000054408 | Spcs3         | signal peptidase complex subunit 3 homolog (S. cerevisiae) [Source:MGI Symbol;Acc:MGI:1923937]                                   |        | 146,0949361  | -0,5521968 | -1,46631673 | 7,19057116 | 15,2553009 | 9,39128E-05 | 0,00064459   | protein_coding |
| ENSMUSG00000016921 | Srsf6         | serine/arginine-rich splicing factor 6 [Source:MGI Symbol;Acc:MGI:1915246]                                                       |        | 200,360201   | -0,5527988 | -1,46692876 | 6,94549629 | 15,5859903 | 7,88366E-05 | 0,000554531  | protein_coding |
| ENSMUSG00000022337 | Emc2          | ER membrane protein complex subunit 2 [Source:MGI Symbol;Acc:M                                                                   |        |              |            |             |            |            |             |              |                |

|                    |               |                                                                                                                        |        |              |            |             |            |             |             |             |                |
|--------------------|---------------|------------------------------------------------------------------------------------------------------------------------|--------|--------------|------------|-------------|------------|-------------|-------------|-------------|----------------|
| ENSMUSG00000025626 | Phf6          | PHD finger protein 6 [Source:MGI Symbol;Acc:MGI:1918248]                                                               | Sheet1 | 70,22210068  | -0,5552543 | -1,46942758 | 6,1343704  | 17,1716183  | 3,41501E-05 | 0,00026056  | protein_coding |
| ENSMUSG00000025290 | Rps24         | ribosomal protein S24 [Source:MGI Symbol;Acc:MGI:98147]                                                                |        | 643,539997   | -0,5668199 | -1,47102311 | 9,32964903 | 10,0475735  | 0,001525487 | 0,007422733 | protein_coding |
| ENSMUSG00000017754 | Pltp          | phospholipid transfer protein [Source:MGI Symbol;Acc:MGI:103151]                                                       |        | 14,15,517049 | -0,5570132 | -1,47122023 | 10,4669793 | 6,62392389  | 0,010061792 | 0,03656927  | protein_coding |
| ENSMUSG00000035064 | Eef2k         | eukaryotic elongation factor-2 kinase [Source:MGI Symbol;Acc:MGI:1195261]                                              |        | 14,19277123  | -0,5573079 | -1,47152077 | 3,81289868 | 8,44495686  | 0,003660571 | 0,015667587 | protein_coding |
| ENSMUSG00000072940 | Gm10443       | predicted pseudogene 10443 [Source:MGI Symbol;Acc:MGI:3704272]                                                         |        | 94,75111701  | -0,5578406 | -1,47206416 | 6,55981044 | 15,85643583 | 6,83329E-05 | 0,000486568 | pseudogene     |
| ENSMUSG00000018547 | Pip4k2b       | phosphatidylinositol-5-phosphate 4-kinase, type II, beta [Source:MGI Symbol;Acc:MGI:1934234]                           |        | 142,6271258  | -0,5583565 | -1,47259074 | 7,15449602 | 14,6473354  | 0,000219618 | 0,000857381 | protein_coding |
| ENSMUSG00000027882 | Stxbp3a       | syntaxin binding protein 3A [Source:MGI Symbol;Acc:MGI:107362]                                                         |        | 136,8911583  | -0,5588183 | -1,47306214 | 7,09503732 | 15,6848911  | 7,48195E-05 | 0,000530349 | protein_coding |
| ENSMUSG00000021375 | Kif13a        | kinesin family member 13A [Source:MGI Symbol;Acc:MGI:1098264]                                                          |        | 37,87593457  | -0,5600508 | -1,47432112 | 5,23322748 | 14,4339842  | 0,000145159 | 0,000946506 | protein_coding |
| ENSMUSG00000024725 | Ostf1         | osteoclast stimulating factor 1 [Source:MGI Symbol;Acc:MGI:700012]                                                     |        | 308,7823237  | -0,5600503 | -1,47432339 | 8,26978122 | 13,768879   | 0,000260733 | 0,001289819 | protein_coding |
| ENSMUSG00000028463 | Car9          | carbonic anhydrase 9 [Source:MGI Symbol;Acc:MGI:2447188]                                                               |        | 13,83770396  | -0,5602052 | -1,47447889 | 3,7888845  | 9,34998326  | 0,002229875 | 0,010285322 | protein_coding |
| ENSMUSG00000032563 | Mrp3          | mitochondrial ribosomal protein L3 [Source:MGI Symbol;Acc:MGI:2137204]                                                 |        | 81,54893712  | -0,5608116 | -1,47509878 | 6,34911903 | 17,8291079  | 2,41685E-05 | 0,000192259 | protein_coding |
| ENSMUSG00000033059 | Pygb          | brain glycogen phosphorylase [Source:MGI Symbol;Acc:MGI:97828]                                                         |        | 107,2986452  | -0,5614799 | -1,47578228 | 7,4444561  | 16,5272005  | 4,79571E-05 | 0,000354103 | protein_coding |
| ENSMUSG00000040616 | Tmem51        | transmembrane protein 51 [Source:MGI Symbol;Acc:MGI:2384874]                                                           |        | 40,9003056   | -0,5615304 | -1,47583393 | 5,34806876 | 13,1818227  | 0,000282678 | 0,001698075 | protein_coding |
| ENSMUSG00000034192 | Lsm3          | LSM3 homolog, U6 small nuclear RNA associated (S. cerevisiae) [Source:MGI Symbol;Acc:MGI:1914928]                      |        | 19,13359528  | -0,561667  | -1,47597366 | 4,25495249 | 11,1596931  | 0,000835938 | 0,00439237  | protein_coding |
| ENSMUSG0000000740  | Rpl13         | ribosomal protein L13 [Source:MGI Symbol;Acc:MGI:105922]                                                               |        | 442,0507901  | -0,5621354 | -1,47645297 | 8,7869882  | 11,7843314  | 0,000597313 | 0,003278063 | protein_coding |
| ENSMUSG00000033857 | Engase        | endo-beta-N-acetylglucosaminidase [Source:MGI Symbol;Acc:MGI:2443788]                                                  |        | 10,29590569  | -0,5626438 | -1,47697338 | 3,35599657 | 6,91799094  | 0,008533279 | 0,031802964 | protein_coding |
| ENSMUSG00000020652 | Cenpo         | centromere protein O [Source:MGI Symbol;Acc:MGI:1923800]                                                               |        | 15,44847754  | -0,5640898 | -1,47845443 | 3,93878237 | 9,65736345  | 0,001885941 | 0,008912186 | protein_coding |
| ENSMUSG00000071359 | Tbpl1         | TATA box binding protein-like 1 [Source:MGI Symbol;Acc:MGI:1339946]                                                    |        | 31,31858419  | -0,5656131 | -1,4800163  | 4,96212843 | 13,9484463  | 0,000187983 | 0,001189158 | protein_coding |
| ENSMUSG00000032038 | St3gal4       | ST3 beta-galactoside alpha-2,3-sialyltransferase 4 [Source:MGI Symbol;Acc:MGI:1316743]                                 |        | 10,67111046  | -0,5659712 | -1,48038376 | 3,88999075 | 9,30033459  | 0,002911106 | 0,01052357  | protein_coding |
| ENSMUSG00000030871 | Ears2         | glutamyl-tRNA synthetase 2 (mitochondrial)(putative) [Source:MGI Symbol;Acc:MGI:1914667]                               |        | 10,66576695  | -0,5659772 | -1,4803899  | 3,40806291 | 6,5937821   | 0,010233554 | 0,037107609 | protein_coding |
| ENSMUSG00000027544 | Nfatc2        | nuclear factor of activated T cells, cytoplasmic, calcineurin dependent 2 [Source:MGI Symbol;Acc:MGI:102463]           |        | 142,1303003  | -0,5663685 | -1,48079147 | 7,14797501 | 13,3061005  | 0,000264544 | 0,001601402 | protein_coding |
| ENSMUSG00000067870 | Rpl31-ps8     | ribosomal protein L31, pseudogene 8 [Source:MGI Symbol;Acc:MGI:3647726]                                                |        | 399,4762371  | -0,5665082 | -1,48093487 | 8,64136485 | 12,0062421  | 0,000530227 | 0,009597157 | pseudogene     |
| ENSMUSG00000054387 | Mdm4          | transformed mouse 3T3 cell double minute 4 [Source:MGI Symbol;Acc:MGI:107934]                                          |        | 46,94765783  | -0,5666288 | -1,48105865 | 5,54855035 | 14,1403509  | 0,000169665 | 0,001084297 | protein_coding |
| ENSMUSG00000022186 | Oxct1         | 3-oxoacid CoA transferase 1 [Source:MGI Symbol;Acc:MGI:1914291]                                                        |        | 177,7532395  | -0,5668153 | -1,4812502  | 7,47350912 | 17,5072794  | 2,8621E-05  | 0,00022302  | protein_coding |
| ENSMUSG00000052146 | Rps10         | ribosomal protein S10 [Source:MGI Symbol;Acc:MGI:1914347]                                                              |        | 439,764333   | -0,5671992 | -1,48164433 | 8,77972951 | 11,7600548  | 0,000605154 | 0,00331778  | protein_coding |
| ENSMUSG00000043895 | S1pr2         | sphingosine-1-phosphate receptor 2 [Source:MGI Symbol;Acc:MGI:99569]                                                   |        | 187,8010151  | -0,5675798 | -1,48203527 | 7,55191049 | 17,9218066  | 2,30169E-05 | 0,000184589 | protein_coding |
| ENSMUSG00000037341 | Slc9a7        | solute carrier family 9 (sodium/hydrogen exchanger), member 7 [Source:MGI Symbol;Acc:MGI:2444530]                      |        | 10,00805918  | -0,567604  | -1,4820601  | 3,3184235  | 7,19060539  | 0,007328625 | 0,027987349 | protein_coding |
| ENSMUSG00000055923 | Aasdh         | aminooxidate-semialdehyde dehydrogenase [Source:MGI Symbol;Acc:MGI:2442517]                                            |        | 9,815369735  | -0,5676227 | -1,48207941 | 3,27524567 | 7,03026126  | 0,008014366 | 0,03019679  | protein_coding |
| ENSMUSG00000055228 | Zfp935        | zinc finger protein 935 [Source:MGI Symbol;Acc:MGI:1918758]                                                            |        | 9,694456168  | -0,5676311 | -1,48208794 | 3,28026791 | 7,04602734  | 0,007944125 | 0,029983545 | protein_coding |
| ENSMUSG00000030560 | Ctsc          | cathepsin C [Source:MGI Symbol;Acc:MGI:109553]                                                                         |        | 481,7522361  | -0,5683974 | -1,48287547 | 8,91220696 | 16,83109456 | 0,003833396 | 0,016217759 | protein_coding |
| ENSMUSG00000037337 | Map4k1        | mitogen-activated protein kinase kinase kinase 1 [Source:MGI Symbol;Acc:MGI:1346882]                                   |        | 13,43787537  | -0,5687549 | -1,48324296 | 3,73032945 | 8,30685344  | 0,003949576 | 0,016628367 | protein_coding |
| ENSMUSG00000022957 | Itns1         | intersectin 1 (SH3 domain protein 1A) [Source:MGI Symbol;Acc:MGI:1338069]                                              |        | 428,821291   | -0,5695855 | -1,48409713 | 8,74414003 | 11,7479748  | 0,000690995 | 0,003336054 | protein_coding |
| ENSMUSG00000028581 | Laptm5        | lysosomal-associated protein transmembrane 5 [Source:MGI Symbol;Acc:MGI:108046]                                        |        | 2180,315264  | -0,5703547 | -1,48488864 | 11,0902549 | 6,61996299  | 0,010084193 | 0,036614351 | protein_coding |
| ENSMUSG00000031712 | Il15          | interleukin 15 [Source:MGI Symbol;Acc:MGI:103014]                                                                      |        | 10,13716625  | -0,5705303 | -1,48506931 | 3,33092111 | 6,80336264  | 0,009098635 | 0,033624859 | protein_coding |
| ENSMUSG00000039270 | Megf9         | multiple EGF-like-domains 9 [Source:MGI Symbol;Acc:MGI:1918264]                                                        |        | 27,91639984  | -0,5707684 | -1,48531446 | 4,80727986 | 12,8586438  | 0,000335924 | 0,001975801 | protein_coding |
| ENSMUSG00000025967 | Eef1b2        | eukaryotic translation elongation factor 1 beta 2 [Source:MGI Symbol;Acc:MGI:1929520]                                  |        | 380,1357405  | -0,5710084 | -1,48556157 | 8,56975173 | 12,8965194  | 0,000329194 | 0,001942455 | protein_coding |
| ENSMUSG00000028964 | Park7         | Parkinson disease (autosomal recessive, early onset) 7 [Source:MGI Symbol;Acc:MGI:2135637]                             |        | 86,84528828  | -0,5710557 | -1,48561028 | 6,43840726 | 19,4793674  | 0,01692E-05 | 8,80451E-05 | protein_coding |
| ENSMUSG00000034165 | Cncd3         | cyclin D3 [Source:MGI Symbol;Acc:MGI:88315]                                                                            |        | 67,19412247  | -0,5715405 | -1,4861096  | 6,06957169 | 14,6387032  | 0,000130213 | 0,000860799 | protein_coding |
| ENSMUSG00000032000 | Birc3         | baculoviral IAP repeat-containing 3 [Source:MGI Symbol;Acc:MGI:1197007]                                                |        | 200,5676839  | -0,5720773 | -1,48666261 | 7,64799037 | 12,2323883  | 0,00046967  | 0,002662677 | protein_coding |
| ENSMUSG00000024277 | Mapre2        | microtubule-associated protein, RP/EB family, member 2 [Source:MGI Symbol;Acc:MGI:106271]                              |        | 101,3436949  | -0,5722068 | -1,48679612 | 6,66158598 | 20,5438721  | 5,82801E-06 | 5,3494E-05  | protein_coding |
| ENSMUSG00000028028 | Alpk1         | alpha-kinase 1 [Source:MGI Symbol;Acc:MGI:1918731]                                                                     |        | 39,70867934  | -0,5723539 | -1,48694774 | 5,31116823 | 13,5846736  | 0,00022804  | 0,001403626 | protein_coding |
| ENSMUSG00000033278 | Ptprm         | protein tyrosine phosphatase, receptor type, M [Source:MGI Symbol;Acc:MGI:102694]                                      |        | 201,9071755  | -0,5724675 | -1,48706474 | 7,65705876 | 13,0528657  | 0,000302821 | 0,001800374 | protein_coding |
| ENSMUSG00000057367 | Birc2         | baculoviral IAP repeat-containing 2 [Source:MGI Symbol;Acc:MGI:1197009]                                                |        | 31,13606689  | -0,5725981 | -1,4871994  | 4,95958519 | 11,9591     | 0,000543811 | 0,003013008 | protein_coding |
| ENSMUSG00000042742 | B630005N14Rik | RIKEN cDNA B630005N14 gene [Source:MGI Symbol;Acc:MGI:2141466]                                                         |        | 193,9895435  | -0,5757007 | -1,48940116 | 7,6003637  | 16,2363706  | 5,59104E-05 | 0,000407893 | protein_coding |
| ENSMUSG00000021877 | Arf4          | ADP-ribosylation factor 4 [Source:MGI Symbol;Acc:MGI:99433]                                                            |        | 181,8559265  | -0,576415  | -1,49113926 | 7,50536001 | 15,9861508  | 6,38076E-05 | 0,000458805 | protein_coding |
| ENSMUSG00000021025 | Nfkbia        | nuclear factor of kappa light polypeptide gene enhancer in B cells inhibitor, alpha [Source:MGI Symbol;Acc:MGI:104741] |        | 200,1659695  | -0,5765117 | -1,49123925 | 7,64564221 | 13,1468647  | 0,000288001 | 0,001727219 | protein_coding |
| ENSMUSG00000042507 | C130039O16Rik | RIKEN cDNA C130039O16 gene [Source:MGI Symbol;Acc:MGI:2685106]                                                         |        | 99,71106852  | -0,5765876 | -1,49131764 | 6,63787801 | 15,939089   | 6,54138E-05 | 0,000468514 | protein_coding |
| ENSMUSG00000021947 | Cryl1         | crystallin, lambda 1 [Source:MGI Symbol;Acc:MGI:1915881]                                                               |        | 20,52576232  | -0,5772059 | -1,4919569  | 4,3596456  | 12,6581933  | 0,000373923 | 0,002174852 | protein_coding |
| ENSMUSG00000029720 | Gm20605       | predicted gene 20605 [Source:MGI Symbol;Acc:MGI:5306917]                                                               |        | 58,19263907  | -0,5786205 | -1,49342056 | 5,84666092 | 17,1181371  | 3,51253E-05 | 0,000266889 | protein_coding |
| ENSMUSG00000081739 | Mdm4-ps       | transformed mouse 3T3 cell double minute 4, pseudogene [Source:MGI Symbol;Acc:MGI:2136991]                             |        | 23,65494053  | -0,5792475 | -1,49406978 | 4,55839042 | 10,489837   | 0,00120033  | 0,005997281 | pseudogene     |
| ENSMUSG00000025508 | Rplp2         | ribosomal protein, large P2 [Source:MGI Symbol;Acc:MGI:1914436]                                                        |        | 367,8112762  | -0,5796462 | -1,49448272 | 8,52162643 | 13,595631   | 0,000226713 | 0,000937022 | protein_coding |
| ENSMUSG00000066682 | Plirb2        | paired immunoglobulin-like type 2 receptor beta 2 [Source:MGI Symbol;Acc:MGI:2450535]                                  |        | 12,32659209  | -0,5806024 | -1,49547355 | 3,61790828 | 6,03137582  | 0,014053775 | 0,047686481 | protein_coding |
| ENSMUSG00000000211 | Sfp1          | SFFV proviral integration 1 [Source:MGI Symbol;Acc:MGI:98282]                                                          |        | 605,8764547  | -0,5810999 | -1,4959893  | 9,24262547 | 10,3694143  | 0,001281202 | 0,006349375 | protein_coding |
| ENSMUSG00000029455 | Alhd2         | aldehyde dehydrogenase 2, mitochondrial [Source:MGI Symbol;Acc:MGI:99600]                                              |        | 427,2761436  | -0,5814082 | -1,49630907 | 8,73868432 | 13,6398221  | 0,000221438 | 0,00136913  | protein_coding |
| ENSMUSG00000057069 | Ero11b        | ERO1-like beta (S. cerevisiae) [Source:MGI Symbol;Acc:MGI:1914725]                                                     |        | 40,23428191  | -0,5814557 | -1,49635831 | 5,33112934 | 17,5503581  | 2,79798E-05 | 0,0002188   | protein_coding |
| ENSMUSG00000029461 | Fam168a       | family with sequence similarity 168, member A [Source:MGI Symbol;Acc:MGI:2442372]                                      |        | 77,00587388  | -0,5816059 | -1,49651414 | 6,26363663 | 18,8152088  | 1,44014E-05 | 0,000121265 | protein_coding |
| ENSMUSG00000022378 | Fam49b        | family with sequence similarity 49, member B [Source:MGI Symbol;Acc:MGI:1923520]                                       |        | 307,0106539  | -0,5821232 | -1,49705081 | 8,26216464 | 14,0183668  | 0,000114034 | 0,001149056 | protein_coding |
| ENSMUSG00000051978 | Erich1        | glutamate-rich 1 [Source:MGI Symbol;Acc:MGI:3588201]                                                                   |        | 9,234055465  | -0,5824726 | -1,49741342 | 3,2005521  | 6,78022714  | 0,009217316 | 0,033949263 | protein_coding |
| ENSMUSG00000022283 | Pabpc1        | poly(A) binding protein, cytoplasmic 1 [Source:MGI Symbol;Acc:MGI:1349722]                                             |        | 1324,535714  | -0,5827958 | -1,49774896 | 10,3711626 | 8,28149794  | 0,00005107  | 0,016834015 | protein_coding |
| ENSMUSG00000045962 | Wnk1          | WNK lysine deficient protein kinase 1 [Source:MGI Symbol;Acc:MGI:2442092]                                              |        | 1194,044165  | -0,5834067 | -1,49838332 | 10,2215595 | 8,86182609  | 0,020911961 | 0,01288175  | protein_coding |
| ENSMUSG00000031708 | Tecr          | trans-2,3-enoyl-CoA reductase [Source:MGI Symbol;Acc:MGI:1915408]                                                      |        | 113,4754151  | -0,5835755 | -1,49855857 | 6,8230408  | 17,9007496  | 2,32729E-05 | 0,000186234 | protein_coding |
| ENSMUSG00000030272 | Camk1         | calcium/calmodulin-dependent protein kinase I [Source:MGI Symbol;Acc:MGI:1098535]                                      |        | 174,7526175  | -0,5838428 | -1,49883632 | 7,44565629 | 16,8322123  | 4,08343E-05 | 0,000305201 | protein_coding |
| ENSMUSG00000032312 | Csk           | c-src tyrosine kinase [Source:MGI Symbol;Acc:MGI:88537]                                                                |        | 276,8452908  | -0,5860539 | -1,50113516 | 8,11219409 | 14,80629    | 0,000119137 | 0,000796691 | protein_coding |
| ENSMUSG00000066238 | Rpl17         | ribosomal protein L17 [Source:MGI Symbol;Acc:MGI:2448870]                                                              |        | 548,8395541  | -0,5882037 | -1,50337374 | 9,09983259 | 11,3836137  | 0,000740948 | 0,003969185 | protein_coding |
| ENSMUSG00000004319 | Cln3          | chloride channel 3 [Source:MGI Symbol;Acc:MGI:103555]                                                                  |        | 96,14559963  | -0,5893526 | -1,50457148 | 6,58419737 | 20,5845029  | 5,52021E-06 | 5,25021E-05 | protein_coding |
| ENSMUSG00000015488 | Cacfd1        | calcium channel flower domain containing 1 [Source:MGI Symbol;Acc:MGI:1924317]                                         |        | 27,20998556  | -0,589419  | -1,50464068 | 4,75697384 | 14,4100004  | 0,000147019 | 0,0009575   | protein_coding |
| ENSMUSG00000040818 | Fam116a       | family with sequence similarity 116, member A [Source:MGI Symbol;Acc:MGI:2442980]                                      |        | 80,24269358  | -0,5897883 | -1,50502585 | 6,32501922 | 18,8149361  | 1,44035E-05 | 0,000121265 | protein_coding |
| ENSMUS             |               |                                                                                                                        |        |              |            |             |            |             |             |             |                |

|                    |               |                                                                                                                               |        |             |            |                    |            |            |              |              |                |
|--------------------|---------------|-------------------------------------------------------------------------------------------------------------------------------|--------|-------------|------------|--------------------|------------|------------|--------------|--------------|----------------|
| ENSMUSG00000034994 | Eef2          | eukaryotic translation elongation factor 2 [Source:MGI Symbol;Acc:MGI:95288]                                                  | Sheet1 | 2508,870584 | -0,5940591 | <b>-1,50948781</b> | 11,2927569 | 6,76679605 | 0,009286941  | 0,0341599    | protein_coding |
| ENSMUSG00000071708 | Sms           | spermine synthase [Source:MGI Symbol;Acc:MGI:109490]                                                                          |        | 65,59136895 | -0,5950991 | <b>-1,51057633</b> | 6,03419949 | 17,8464915 | 2,3946E-05   | 0,000190925  | protein_coding |
| ENSMUSG00000051355 | Commd1        | COMM domain containing 1 [Source:MGI Symbol;Acc:MGI:109474]                                                                   |        | 157,12118   | -0,5954702 | <b>-1,51096498</b> | 7,29758403 | 17,8307166 | 2,41454E-05  | 0,000192259  | protein_coding |
| ENSMUSG00000037344 | Slic12a9      | solute carrier family 12 (potassium/chloride transporters), member 9 [Source:MGI Symbol;Acc:MGI:1933532]                      |        | 51,24020978 | -0,5961096 | <b>-1,51132357</b> | 5,67084803 | 14,1882608 | 0,000156599  | 0,0001062093 | protein_coding |
| ENSMUSG00000022312 | Eif3h         | eukaryotic translation initiation factor 3, subunit H [Source:MGI Symbol;Acc:MGI:1915385]                                     |        | 193,1204743 | -0,5961801 | <b>-1,51170861</b> | 7,59221286 | 18,4380382 | 1,75519E-05  | 0,000144995  | protein_coding |
| ENSMUSG00000008668 | Rps18         | ribosomal protein S18 [Source:MGI Symbol;Acc:MGI:98146]                                                                       |        | 527,9129607 | -0,5963064 | <b>-1,51184102</b> | 9,0436603  | 11,8021289 | 0,00059163   | 0,003250121  | protein_coding |
| ENSMUSG00000043323 | Fbrs1         | fibrosin-like 1 [Source:MGI Symbol;Acc:MGI:1920907]                                                                           |        | 98,41860168 | -0,5971786 | <b>-1,51275527</b> | 6,61263375 | 20,181334  | 7,04369E-06  | 6,34336E-05  | protein_coding |
| ENSMUSG00000038005 | 2700029M09Rik | RIKEN cDNA 2700029M09 gene [Source:MGI Symbol;Acc:MGI:1919862]                                                                |        | 70,89314718 | -0,5973718 | <b>-1,51295788</b> | 6,14693242 | 19,8157372 | 8,52777E-06  | 7,53177E-05  | protein_coding |
| ENSMUSG00000075232 | Amd1          | S-adenosylmethionine decarboxylase 1 [Source:MGI Symbol;Acc:MGI:88004]                                                        |        | 316,0445487 | -0,5976337 | <b>-1,51323257</b> | 8,30425629 | 14,3003183 | 0,000155839  | 0,0001008956 | protein_coding |
| ENSMUSG00000015882 | Lcorl         | ligand dependent nuclear receptor corepressor-like [Source:MGI Symbol;Acc:MGI:2651932]                                        |        | 29,08156748 | -0,597908  | <b>-1,51352023</b> | 4,85978657 | 16,0121609 | 6,29369E-05  | 0,000453435  | protein_coding |
| ENSMUSG00000038274 | Fau           | Finkel-Biskis-Reilly murine sarcoma virus (FBR-MuSV) ubiquitously expressed (fox derived) [Source:MGI Symbol;Acc:MGI:1914262] |        | 73,79411666 | -0,5986194 | <b>-1,51426674</b> | 6,19843681 | 20,7223284 | 5,30933E-06  | 4,93099E-05  | protein_coding |
| ENSMUSG00000032855 | Pkd1          | polycystic kidney disease 1 homolog [Source:MGI Symbol;Acc:MGI:97603]                                                         |        | 103,1018533 | -0,5991548 | <b>-1,51482883</b> | 6,68506545 | 19,7470225 | 8,83993E-06  | 7,78864E-05  | protein_coding |
| ENSMUSG00000051906 | Cd209f        | CD209f antigen [Source:MGI Symbol;Acc:MGI:1916392]                                                                            |        | 481,4102401 | -0,599503  | <b>-1,51519455</b> | 8,91166028 | 12,8942815 | 0,000329588  | 0,0001943735 | protein_coding |
| ENSMUSG00000032115 | Hyou1         | hypoxia up-regulated 1 [Source:MGI Symbol;Acc:MGI:108030]                                                                     |        | 174,3616334 | -0,6001442 | <b>-1,51586803</b> | 7,4449694  | 17,6767676 | 2,61805E-05  | 0,000205993  | protein_coding |
| ENSMUSG00000018909 | Arreb1        | arrestin, beta 1 [Source:MGI Symbol;Acc:MGI:99473]                                                                            |        | 459,1595394 | -0,6005658 | <b>-1,51631115</b> | 8,84238377 | 13,1479054 | 0,000287841  | 0,001727202  | protein_coding |
| ENSMUSG00000024177 | Nme4          | NME/NUM2 nucleoside diphosphate kinase 4 [Source:MGI Symbol;Acc:MGI:1931148]                                                  |        | 33,1699349  | -0,6008335 | <b>-1,51659251</b> | 5,04773065 | 16,7881869 | 4,17927E-05  | 0,000311306  | protein_coding |
| ENSMUSG00000030956 | Fam53b        | family with sequence similarity 53, member B [Source:MGI Symbol;Acc:MGI:1925188]                                              |        | 69,29539132 | -0,6015428 | <b>-1,51733832</b> | 6,10898474 | 18,4260729 | 1,76625E-05  | 0,000145686  | protein_coding |
| ENSMUSG00000021322 | Aoah          | acyloxyacyl hydrolase [Source:MGI Symbol;Acc:MGI:1350928]                                                                     |        | 339,3939071 | -0,6016301 | <b>-1,51743016</b> | 8,40684238 | 13,5236105 | 0,000235581  | 0,001444378  | protein_coding |
| ENSMUSG00000061787 | Rps17         | ribosomal protein S17 [Source:MGI Symbol;Acc:MGI:1309526]                                                                     |        | 272,1895294 | -0,6025579 | <b>-1,51840633</b> | 8,53920827 | 14,2408687 | 0,000160839  | 0,001035232  | protein_coding |
| ENSMUSG00000059291 | Rpl11         | ribosomal protein L11 [Source:MGI Symbol;Acc:MGI:1914275]                                                                     |        | 360,9843621 | -0,6033522 | <b>-1,51924256</b> | 8,02653831 | 17,7720335 | 2,49017E-05  | 0,000197256  | protein_coding |
| ENSMUSG00000034832 | Tet3          | tet methylcytosine dioxygenase 3 [Source:MGI Symbol;Acc:MGI:2446229]                                                          |        | 164,5667222 | -0,6035776 | <b>-1,51947991</b> | 7,35933661 | 17,7421495 | 5,22595E-05  | 0,000199947  | protein_coding |
| ENSMUSG00000064357 | mt-Atp6       | mitochondrially encoded ATP synthase 6 [Source:MGI Symbol;Acc:MGI:99927]                                                      |        | 1854,867037 | -0,6038211 | <b>-1,51973637</b> | 10,8571332 | 7,93438307 | 0,004850416  | 0,019672027  | protein_coding |
| ENSMUSG00000053317 | Sec61b        | Sec61 beta subunit [Source:MGI Symbol;Acc:MGI:1913462]                                                                        |        | 49,77128237 | -0,6049188 | <b>-1,52089315</b> | 5,63075073 | 16,2283475 | 5,61476E-05  | 0,000409081  | protein_coding |
| ENSMUSG00000062006 | Rpl34         | ribosomal protein L34 [Source:MGI Symbol;Acc:MGI:1915686]                                                                     |        | 308,1800243 | -0,6052866 | <b>-1,52128089</b> | 8,2665464  | 15,2457301 | 9,43E-05     | 0,000646738  | protein_coding |
| ENSMUSG00000060938 | Rpl26         | ribosomal protein L26 [Source:MGI Symbol;Acc:MGI:106022]                                                                      |        | 564,9674119 | -0,6059727 | <b>-1,5220046</b>  | 9,14170362 | 11,9581796 | 0,00054408   | 0,003013008  | protein_coding |
| ENSMUSG00000040687 | Madd          | MAP-kinase activating death domain [Source:MGI Symbol;Acc:MGI:2444672]                                                        |        | 164,6348763 | -0,6063751 | <b>-1,52242913</b> | 7,36074919 | 18,9457622 | 1,34488E-05  | 0,000113663  | protein_coding |
| ENSMUSG00000030156 | Cd69          | CD69 antigen [Source:MGI Symbol;Acc:MGI:88343]                                                                                |        | 13,64488667 | -0,6064116 | <b>-1,52246763</b> | 3,7853984  | 7,95957474 | 0,0004783365 | 0,019479182  | protein_coding |
| ENSMUSG00000030793 | Pycard        | PYD and CARD domain containing [Source:MGI Symbol;Acc:MGI:1931465]                                                            |        | 123,7528696 | -0,6066951 | <b>-1,52276683</b> | 6,94829169 | 13,2118796 | 0,00027818   | 0,0001675639 | protein_coding |
| ENSMUSG00000024851 | Pitpnm1       | phosphatidylinositol transfer protein, membrane-associated 1 [Source:MGI Symbol;Acc:MGI:1197524]                              |        | 84,89776831 | -0,6070078 | <b>-1,52309695</b> | 6,40194007 | 22,1315973 | 2,54585E-06  | 2,54427E-05  | protein_coding |
| ENSMUSG00000097096 | Themis2       | membrane-associated phosphatidylinositol transfer protein 1 isoform 1 [Source:RefSeq peptide;Acc:NP_032877]                   |        | 84,89776831 | -0,6070102 | <b>-1,52309949</b> | 6,40194626 | 22,107434  | 2,57809E-06  | 2,57037E-05  | protein_coding |
| ENSMUSG00000037731 | Themis2       | thymocyte selection associated family member 2 [Source:MGI Symbol;Acc:MGI:2446213]                                            |        | 99,85969335 | -0,6071116 | <b>-1,52320658</b> | 6,84106363 | 19,5962988 | 9,56543E-06  | 8,33831E-05  | protein_coding |
| ENSMUSG00000026116 | Tmem131       | transmembrane protein 131 [Source:MGI Symbol;Acc:MGI:1927110]                                                                 |        | 191,0045906 | -0,6072858 | <b>-1,52339051</b> | 7,57744632 | 19,533685  | 9,88413E-06  | 8,58474E-05  | protein_coding |
| ENSMUSG00000024807 | Syvn1         | synovial apoptosis inhibitor 1, synoviolin [Source:MGI Symbol;Acc:MGI:1921376]                                                |        | 91,89354084 | -0,6073228 | <b>-1,52342953</b> | 6,51845506 | 19,6938296 | 9,08944E-06  | 7,98287E-05  | protein_coding |
| ENSMUSG00000074994 | Qser1         | glutamine and serine rich 1 [Source:MGI Symbol;Acc:MGI:2138986]                                                               |        | 38,15874756 | -0,6074845 | <b>-1,52360034</b> | 5,25121067 | 18,8067817 | 1,44652E-05  | 0,000121598  | protein_coding |
| ENSMUSG00000019471 | Cdc37         | cell division cycle 37 [Source:MGI Symbol;Acc:MGI:109531]                                                                     |        | 263,8233497 | -0,607714  | <b>-1,52384274</b> | 8,04224024 | 17,6853362 | 2,60628E-05  | 0,000205565  | protein_coding |
| ENSMUSG00000093445 | Lrch4         | leucine-rich repeats and calponin homology (CH) domain containing 4 [Source:MGI Symbol;Acc:MGI:1917193]                       |        | 138,3336523 | -0,6082143 | <b>-1,52437128</b> | 7,1094939  | 17,3676411 | 3,08026E-05  | 0,00023833   | protein_coding |
| ENSMUSG00000014867 | Surf4         | surfeit gene 4 [Source:MGI Symbol;Acc:MGI:98445]                                                                              |        | 346,9331629 | -0,6084096 | <b>-1,52457764</b> | 8,43833276 | 13,1938957 | 0,000280862  | 0,001689018  | protein_coding |
| ENSMUSG00000058600 | Rpl30         | ribosomal protein L30 [Source:MGI Symbol;Acc:MGI:98037]                                                                       |        | 336,5038618 | -0,6084924 | <b>-1,52466509</b> | 8,39356538 | 15,0084781 | 0,000107029  | 0,00027365   | protein_coding |
| ENSMUSG00000026675 | Hsd17b7       | hydroxysteroid (17-beta) dehydrogenase 7 [Source:MGI Symbol;Acc:MGI:1330808]                                                  |        | 20,26472345 | -0,6089823 | <b>-1,52518294</b> | 4,33416274 | 8,13327707 | 0,004346013  | 0,017999707  | protein_coding |
| ENSMUSG00000034522 | Zfp395        | zinc finger protein 395 [Source:MGI Symbol;Acc:MGI:2682318]                                                                   |        | 21,77302041 | -0,6090707 | <b>-1,52527641</b> | 4,42141295 | 13,3226505 | 0,000262219  | 0,001589958  | protein_coding |
| ENSMUSG00000026425 | Srlp          | SLIT-ROBO Rho GTPase activating protein 2 [Source:MGI Symbol;Acc:MGI:109605]                                                  |        | 354,2905946 | -0,6098081 | <b>-1,52605616</b> | 8,46839354 | 14,4178367 | 0,000146409  | 0,00095409   | protein_coding |
| ENSMUSG00000006411 | PvrL4         | poliovirus receptor-related 4 [Source:MGI Symbol;Acc:MGI:1918990]                                                             |        | 18,26727315 | -0,6101473 | <b>-1,52641508</b> | 4,17415814 | 11,1568919 | 0,000837201  | 0,004394804  | protein_coding |
| ENSMUSG00000059714 | Flot1         | flotillin 1 [Source:MGI Symbol;Acc:MGI:1100500]                                                                               |        | 81,07870767 | -0,6102948 | <b>-1,52657109</b> | 6,33781778 | 20,5794133 | 5,7208E-06   | 5,25539E-05  | protein_coding |
| ENSMUSG00000058546 | Rpl23a        | ribosomal protein L23A [Source:MGI Symbol;Acc:MGI:3040672]                                                                    |        | 502,5782121 | -0,6115136 | <b>-1,52786127</b> | 8,97269969 | 12,1707388 | 0,000485451  | 0,0002735204 | protein_coding |
| ENSMUSG00000039232 | Stx11         | syntaxin 11 [Source:MGI Symbol;Acc:MGI:1921982]                                                                               |        | 36,95509761 | -0,6136521 | <b>-1,53012778</b> | 5,2076294  | 12,5844447 | 0,000389387  | 0,002258815  | protein_coding |
| ENSMUSG00000042524 | 41549         | Sad1 and UNC84 domain containing 2 [Source:MGI Symbol;Acc:MGI:2443011]                                                        |        | 173,549339  | -0,6138962 | <b>-1,53038668</b> | 7,43729321 | 20,9335759 | 4,75878E-06  | 4,47114E-05  | protein_coding |
| ENSMUSG00000032353 | Tmed3         | transmembrane emp24 domain containing 3 [Source:MGI Symbol;Acc:MGI:1913361]                                                   |        | 76,40951294 | -0,6139356 | <b>-1,53042842</b> | 6,2525664  | 17,4110026 | 3,01078E-05  | 0,000233447  | protein_coding |
| ENSMUSG00000041225 | Arhgap12      | Rho GTPase activating protein 12 [Source:MGI Symbol;Acc:MGI:1922665]                                                          |        | 150,946354  | -0,6141181 | <b>-1,53062201</b> | 7,23627545 | 20,1395818 | 7,19913E-05  | 6,47037E-05  | protein_coding |
| ENSMUSG00000022436 | Sh3bp1        | SH3-domain binding protein 1 [Source:MGI Symbol;Acc:MGI:104603]                                                               |        | 174,6448626 | -0,6142649 | <b>-1,5307778</b>  | 7,44597887 | 16,5131348 | 4,83142E-05  | 0,0003565    | protein_coding |
| ENSMUSG00000020393 | Kremen1       | kringle containing transmembrane protein 1 [Source:MGI Symbol;Acc:MGI:1933988]                                                |        | 125,2462098 | -0,6145458 | <b>-1,53107595</b> | 6,96927761 | 18,5216967 | 1,67981E-05  | 0,000139396  | protein_coding |
| ENSMUSG00000026031 | Cfar          | CASP8 and FADD-like apoptosis regulator [Source:MGI Symbol;Acc:MGI:1336166]                                                   |        | 735,9693606 | -0,6145963 | <b>-1,5311295</b>  | 8,55434007 | 13,7531941 | 0,000208466  | 0,001299407  | protein_coding |
| ENSMUSG00000039637 | Coro7         | coronin 7 [Source:MGI Symbol;Acc:MGI:1926135]                                                                                 |        | 164,2758062 | -0,6158019 | <b>-1,53240949</b> | 7,35798722 | 20,8402644 | 4,99223E-06  | 4,67203E-05  | protein_coding |
| ENSMUSG00000030786 | Ilgam         | integrin alpha M [Source:MGI Symbol;Acc:MGI:96607]                                                                            |        | 1875,691757 | -0,6169301 | <b>-1,53360838</b> | 10,8731542 | 6,40263548 | 0,011395108  | 0,040490962  | protein_coding |
| ENSMUSG00000011884 | Gltp          | glycolipid transfer protein [Source:MGI Symbol;Acc:MGI:1929253]                                                               |        | 285,9278309 | -0,617175  | <b>-1,53386873</b> | 8,1584665  | 17,2670117 | 3,24777E-05  | 0,000249359  | protein_coding |
| ENSMUSG00000028706 | Nsun4         | NOL1/NOP2/Sun domain family, member 4 [Source:MGI Symbol;Acc:MGI:1919431]                                                     |        | 15,8217012  | -0,6173764 | <b>-1,53408284</b> | 3,98166853 | 12,5600607 | 0,000394079  | 0,002281215  | protein_coding |
| ENSMUSG00000070808 | Gltcr1        | glioma tumor suppressor candidate region gene 1 [Source:MGI Symbol;Acc:MGI:2154263]                                           |        | 44,59907381 | -0,617704  | <b>-1,53443125</b> | 5,4643395  | 17,4714057 | 2,91662E-05  | 0,000226626  | protein_coding |
| ENSMUSG00000091811 | Prr24         | proline rich 24 [Source:MGI Symbol;Acc:MGI:1913550]                                                                           |        | 14,16028884 | -0,6178726 | <b>-1,53461057</b> | 3,79471359 | 11,0190596 | 0,000901798  | 0,004697988  | protein_coding |
| ENSMUSG00000034116 | Vav1          | vav 1 oncogene [Source:MGI Symbol;Acc:MGI:98923]                                                                              |        | 630,9608374 | -0,6184676 | <b>-1,53524361</b> | 9,30127526 | 12,0952315 | 0,000505509  | 0,002833879  | protein_coding |
| ENSMUSG00000021156 | Zmynd11       | zinc finger, MYND domain containing 11 [Source:MGI Symbol;Acc:MGI:1913755]                                                    |        | 100,3044069 | -0,6185102 | <b>-1,53528895</b> | 6,64583144 | 23,24054   | 1,42952E-06  | 1,49868E-05  | protein_coding |
| ENSMUSG00000026991 | Pkpx4         | plakophilin 4 [Source:MGI Symbol;Acc:MGI:109281]                                                                              |        | 158,6459009 | -0,6201285 | <b>-1,53701211</b> | 7,30992343 | 16,6003635 | 4,61422E-05  | 0,00034185   | protein_coding |
| ENSMUSG00000052270 | Fpr2          | formyl peptide receptor 2 [Source:MGI Symbol;Acc:MGI:1278319]                                                                 |        | 76,1066344  | -0,6202493 | <b>-1,53714074</b> | 6,25354402 | 17,1597297 | 3,43645E-05  | 0,000261832  | protein_coding |
| ENSMUSG00000099274 | Neat1         | nuclear paraspeckle assembly transcript 1 (non-protein coding) [Source:MGI Symbol;Acc:MGI:1914211]                            |        | 1367,011848 | -0,6202843 | <b>-1,53717807</b> | 10,4166549 | 8,89053649 | 0,002865625  | 0,012709649  | non_coding     |
| ENSMUSG00000000088 | Cox5a         | cytochrome c oxidase, subunit Va [Source:MGI Symbol;Acc:MGI:88474]                                                            |        | 289,6560515 | -0,620607  | <b>-1,53752194</b> | 8,17787092 | 16,4535244 | 4,98574E-05  | 0,000367393  | protein_coding |
| ENSMUSG00000095253 | Zfp799        | zinc finger protein 799 [Source:MGI Symbol;Acc:MGI:2443934]                                                                   |        | 11,93870955 | -0,6210994 | <b>-1,53804675</b> | 3,56073795 | 9,17380114 | 0,000455041  | 0,01115531   | protein_coding |
| ENSMUSG00000047180 | Neur3         | neuronal homolog 3 homolog (Drosophila) [Source:MGI Symbol;Acc:MGI:2429944]                                                   |        | 246,160896  | -0,6220466 | <b>-1,53905691</b> | 7,94250904 | 16,1606214 | 5,81913E-05  | 0,000421178  | protein_coding |
| ENSMUSG00000034120 | Srsf2         | serine/arginine-rich splicing factor 2 [Source:MGI Symbol;Acc:MGI:98284]                                                      |        | 235,4427003 | -0,6227549 | <b>-1,53981271</b> | 7,87825645 | 17,1279549 | 3,49442E-05  | 0,000265881  | protein_coding |
| ENSMUSG00000028233 | Tgs1          | trimethylguanosine synthase homolog (S. cerevisiae) [Source:MGI Symbol;Acc:MGI:2151797]                                       |        |             |            |                    |            |            |              |              |                |

|                     |               |                                                                                                   |        |             |            |                    |            |            |             |              |                |
|---------------------|---------------|---------------------------------------------------------------------------------------------------|--------|-------------|------------|--------------------|------------|------------|-------------|--------------|----------------|
| ENSMUSG00000060860  | Ube2s         | ubiquitin-conjugating enzyme E2S [Source:MGI Symbol;Acc:MGI:1925141]                              | Sheet1 | 101,9365498 | -0,6250728 | <b>-1,54228862</b> | 6,66928408 | 21,3559137 | 3,81442E-06 | 3,66338E-05  | protein_coding |
| ENSMUSG00000049517  | Rps23         | ribosomal protein S23 [Source:MGI Symbol;Acc:MGI:1913725]                                         |        | 142,7382043 | -0,6251369 | <b>-1,54235714</b> | 7,15595535 | 19,3013365 | 1,11628E-05 | 9,57423E-05  | protein_coding |
| ENSMUSG00000017734  | Dbndd2        | dysbindin (dystrobrevin binding protein 1) domain containing 2 [Source:MGI Symbol;Acc:MGI:106562] |        | 24,87209556 | -0,6258054 | <b>-1,54307203</b> | 4,64098298 | 13,0009285 | 0,000311337 | 0,001846009  | protein_coding |
| ENSMUSG00000053175  | Bcl3          | B cell leukemia/lymphoma 3 [Source:MGI Symbol;Acc:MGI:88140]                                      |        | 84,02128781 | -0,6260277 | <b>-1,54330976</b> | 6,38971656 | 18,0428915 | 2,15984E-05 | 0,000174358  | protein_coding |
| ENSMUSG00000067288  | Rps28         | ribosomal protein S28 [Source:MGI Symbol;Acc:MGI:1859516]                                         |        | 184,7953031 | -0,6265165 | <b>-1,54383282</b> | 7,52704132 | 20,7508766 | 5,23076E-06 | 4,87741E-05  | protein_coding |
| ENSMUSG00000048118  | Arid4a        | AT rich interactive domain 4A (RBP1-like) [Source:MGI Symbol;Acc:MGI:2444354]                     |        | 57,7326638  | -0,6268244 | <b>-1,54416226</b> | 5,84540345 | 21,2896601 | 3,94856E-06 | 3,78228E-05  | protein_coding |
| ENSMUSG00000097245  |               |                                                                                                   |        | 7,68424275  | -0,6278136 | <b>-1,54522143</b> | 2,91517891 | 6,67558792 | 0,009774227 | 0,035701273  | pseudogene     |
| ENSMUSG00000039461  | Tcta          | T cell leukemia translocation altered gene [Source:MGI Symbol;Acc:MGI:1918829]                    |        | 22,86254745 | -0,6294224 | <b>-1,54694557</b> | 4,50250404 | 12,4787968 | 0,000411597 | 0,002362706  | protein_coding |
| ENSMUSG00000036206  | Sh3bp4        | SH3-domain binding protein 4 [Source:MGI Symbol;Acc:MGI:2138297]                                  |        | 40,29768485 | -0,6302053 | <b>-1,54778528</b> | 5,33409903 | 15,3407773 | 8,97582E-05 | 0,000621016  | protein_coding |
| ENSMUSG00000085385  | 9430008C03Rik | RIKEN cDNA 9430008C03 gene [Source:MGI Symbol;Acc:MGI:1915358]                                    |        | 26,3023494  | -0,6308083 | <b>-1,54843229</b> | 4,71022937 | 15,3978272 | 8,70884E-05 | 0,000605431  | lincRNA        |
| ENSMUSG00000074884  | Serf2         | small EDRK-rich factor 2 [Source:MGI Symbol;Acc:MGI:1337041]                                      |        | 180,4261735 | -0,6311769 | <b>-1,54882796</b> | 7,49342579 | 18,9815016 | 1,31992E-05 | 0,000111812  | protein_coding |
| ENSMUSG00000078193  | Gm2000        | predicted gene 2000 [Source:MGI Symbol;Acc:MGI:3780170]                                           |        | 187,3437978 | -0,6316226 | <b>-1,54930654</b> | 7,54780633 | 18,4034731 | 1,78732E-05 | 0,000147096  | protein_coding |
| ENSMUSG00000034271  | Jdp2          | Jun dimerization protein 2 [Source:MGI Symbol;Acc:MGI:1932093]                                    |        | 31,75113015 | -0,6323835 | <b>-1,55012381</b> | 4,98143899 | 15,557547  | 8,00315E-05 | 0,000560782  | protein_coding |
| ENSMUSG00000038205  | Prkab2        | protein kinase, AMP-activated, beta 2 non-catalytic subunit [Source:MGI Symbol;Acc:MGI:1336185]   |        | 25,30086607 | -0,6331273 | <b>-1,55092326</b> | 4,66224558 | 18,3244075 | 1,86305E-05 | 0,000152075  | protein_coding |
| ENSMUSG00000009739  | Pou6f1        | POU domain, class 6, transcription factor 1 [Source:MGI Symbol;Acc:MGI:102935]                    |        | 40,05202393 | -0,633396  | <b>-1,55121219</b> | 5,31619262 | 19,5648821 | 9,72403E-06 | 8,45906E-05  | protein_coding |
| ENSMUSG00000020738  | Sumo2         | SMT3 suppressor of miif two 3 homolog 2 (yeast) [Source:MGI Symbol;Acc:MGI:2158813]               |        | 72,00827301 | -0,6335258 | <b>-1,55135174</b> | 6,16268845 | 15,7638455 | 7,17608E-05 | 0,000509985  | protein_coding |
| ENSMUSG00000052299  | Ltn1          | listerin E3 ubiquitin protein ligase 1 [Source:MGI Symbol;Acc:MGI:1926163]                        |        | 120,8121408 | -0,6336623 | <b>-1,55149845</b> | 6,91719519 | 22,9906994 | 1,6208E-06  | 1,68474E-05  | protein_coding |
| ENSMUSG00000052248  | Gm13476       | predicted gene 13476 [Source:MGI Symbol;Acc:MGI:3652108]                                          |        | 20,0553184  | -0,6340025 | <b>-1,55186439</b> | 4,32679168 | 14,1407845 | 0,000169626 | 0,001084297  | antisense      |
| ENSMUSG00000009621  | Vav2          | vav 2 oncogene [Source:MGI Symbol;Acc:MGI:102718]                                                 |        | 87,09164482 | -0,6344134 | <b>-1,55230644</b> | 6,44196047 | 19,2417746 | 1,15165E-05 | 9,84687E-05  | protein_coding |
| ENSMUSG00000069609  | Gm11710       | predicted gene 11710 [Source:MGI Symbol;Acc:MGI:3702658]                                          |        | 48,64843451 | -0,6345122 | <b>-1,55241277</b> | 5,61399718 | 18,4207002 | 1,77123E-05 | 0,000145991  | protein_coding |
| ENSMUSG00000037563  | Rps16         | ribosomal protein S16 [Source:MGI Symbol;Acc:MGI:98118]                                           |        | 327,7319035 | -0,6345929 | <b>-1,55249957</b> | 8,35468641 | 16,1691919 | 5,79286E-05 | 0,000419553  | protein_coding |
| ENSMUSG00000040943  | Tet2          | tet methylcytosine dioxygenase 2 [Source:MGI Symbol;Acc:MGI:2443298]                              |        | 70,74221665 | -0,6357859 | <b>-1,55378393</b> | 6,14223378 | 20,8183719 | 5,04962E-06 | 4,72172E-05  | protein_coding |
| ENSMUSG00000063457  | Rps15         | ribosomal protein S15 [Source:MGI Symbol;Acc:MGI:98117]                                           |        | 388,5741092 | -0,6361619 | <b>-1,55418895</b> | 8,6010191  | 15,1990566 | 9,67517E-05 | 0,000661077  | protein_coding |
| ENSMUSG00000032513  | Gorasp1       | golgi reassembly stacking protein 1 [Source:MGI Symbol;Acc:MGI:1921748]                           |        | 39,25219019 | -0,6363163 | <b>-1,55435532</b> | 5,28772178 | 16,7915951 | 4,17177E-05 | 0,000310958  | protein_coding |
| ENSMUSG00000010406  | Mrp152        | mitochondrial ribosomal protein L52 [Source:MGI Symbol;Acc:MGI:1916086]                           |        | 30,90416482 | -0,6366375 | <b>-1,55470138</b> | 4,94286596 | 17,6000839 | 2,72576E-05 | 0,000213761  | protein_coding |
| ENSMUSG00000004798  | Ulk2          | unc-51 like kinase 2 [Source:MGI Symbol;Acc:MGI:1352758]                                          |        | 77,68576218 | -0,6366582 | <b>-1,55472369</b> | 6,276135   | 20,1233198 | 7,2606E-06  | 6,50671E-05  | protein_coding |
| ENSMUSG00000027540  | Ptpn1         | protein tyrosine phosphatase, non-receptor type 1 [Source:MGI Symbol;Acc:MGI:97805]               |        | 331,6411993 | -0,6367849 | <b>-1,55486203</b> | 8,3729784  | 14,1099397 | 0,00017243  | 0,001097619  | protein_coding |
| ENSMUSG00000009585  | Apobec3       | apolipoprotein B mRNA editing enzyme, catalytic polypeptide 3 [Source:MGI Symbol;Acc:MGI:1933111] |        | 69,62732811 | -0,6376069 | <b>-1,55574638</b> | 6,12031688 | 17,3464944 | 3,11472E-05 | 0,000240827  | protein_coding |
| ENSMUSG00000011832  | Evi5l         | ecotropic viral integration site 5 like [Source:MGI Symbol;Acc:MGI:2442167]                       |        | 21,80853733 | -0,6376835 | <b>-1,55582898</b> | 4,44420754 | 14,5713921 | 0,000134948 | 0,000886659  | protein_coding |
| ENSMUSG00000024608  | Rps14         | ribosomal protein S14 [Source:MGI Symbol;Acc:MGI:98107]                                           |        | 461,4061975 | -0,6384916 | <b>-1,55672011</b> | 8,84926951 | 13,5847347 | 0,000228032 | 0,001403626  | protein_coding |
| ENSMUSG00000021720  | Rnf180        | ring finger protein 180 [Source:MGI Symbol;Acc:MGI:1919066]                                       |        | 8,748673824 | -0,6389654 | <b>-1,55721203</b> | 3,11413032 | 6,89658138 | 0,008636073 | 0,032118916  | protein_coding |
| ENSMUSG00000064356  | mt-Atp8       | mitochondrially encoded ATP synthase 8 [Source:MGI Symbol;Acc:MGI:99926]                          |        | 14,2894567  | -0,6404802 | <b>-1,55884789</b> | 8,69481391 | 16,4846335 | 4,9046E-05  | 0,000361656  | protein_coding |
| ENSMUSG00000005986  | Ankrd13d      | ankyrin repeat domain 13 family, member D [Source:MGI Symbol;Acc:MGI:1915673]                     |        | 25,95366303 | -0,6405271 | <b>-1,55889861</b> | 4,68938164 | 15,7497342 | 7,22981E-05 | 0,000513471  | protein_coding |
| ENSMUSG00000019254  | Ppp1r12c      | protein phosphatase 1, regulatory (inhibitor) subunit 12C [Source:MGI Symbol;Acc:MGI:1924258]     |        | 269,6261662 | -0,6409993 | <b>-1,55940897</b> | 8,07361117 | 16,8498456 | 4,04566E-05 | 0,000302791  | protein_coding |
| ENSMUSG00000020719  | Ddx5          | DEAD (Asp-Glu-Ala-Asp) box polypeptide 5 [Source:MGI Symbol;Acc:MGI:105037]                       |        | 1261,99702  | -0,6430012 | <b>-1,56157426</b> | 10,3013792 | 9,6667614  | 0,001876318 | 0,008885821  | protein_coding |
| ENSMUSG000000031093 | Dock11        | dedicator of cytokinesis 11 [Source:MGI Symbol;Acc:MGI:1923224]                                   |        | 141,9869905 | -0,6440092 | <b>-1,5626657</b>  | 7,14926574 | 23,369483  | 1,33683E-06 | 1,41092E-05  | protein_coding |
| ENSMUSG00000040528  | Gm885         | predicted gene 885 [Source:MGI Symbol;Acc:MGI:2685731]                                            |        | 137,7999413 | -0,6441744 | <b>-1,56284465</b> | 7,10642255 | 20,3107013 | 6,58314E-05 | 5,97266E-05  | protein_coding |
| ENSMUSG00000083596  | Rpl21-ps15    | ribosomal protein L21, pseudogene 15 [Source:MGI Symbol;Acc:MGI:3705426]                          |        | 62,72395373 | -0,6447833 | <b>-1,56350442</b> | 5,9614589  | 15,304929  | 9,14775E-05 | 0,000630134  | pseudogene     |
| ENSMUSG00000068114  | Ccdc134       | coiled-coil domain containing 134 [Source:MGI Symbol;Acc:MGI:1923707]                             |        | 11,91197654 | -0,6448547 | <b>-1,56358183</b> | 3,56924808 | 8,25754095 | 0,004058306 | 0,017025052  | protein_coding |
| ENSMUSG00000020108  | Ddit4         | DNA-damage-inducible transcript 4 [Source:MGI Symbol;Acc:MGI:1921997]                             |        | 8,12788139  | -0,644874  | <b>-1,56360267</b> | 2,99867575 | 6,62454489 | 0,010058284 | 0,03656927   | protein_coding |
| ENSMUSG00000048578  | Mlec          | mlectin [Source:MGI Symbol;Acc:MGI:1924015]                                                       |        | 222,8316173 | -0,645202  | <b>-1,56395827</b> | 7,79852512 | 19,3803114 | 1,07106E-05 | 9,22956E-05  | protein_coding |
| ENSMUSG00000064358  | mt-Co3        | mitochondrially encoded cytochrome c oxidase III [Source:MGI Symbol;Acc:MGI:102502]               |        | 2132,652972 | -0,6454228 | <b>-1,56419767</b> | 11,0584589 | 8,54494416 | 0,003464832 | 0,014952126  | protein_coding |
| ENSMUSG00000079426  | Arcp4         | actin related protein 2/3 complex, subunit 4 [Source:MGI Symbol;Acc:MGI:1915339]                  |        | 533,8860292 | -0,6455231 | <b>-1,56430636</b> | 9,06005502 | 13,8111211 | 0,000202136 | 0,001265453  | protein_coding |
| ENSMUSG00000024955  | Esrra         | estrogen related receptor, alpha [Source:MGI Symbol;Acc:MGI:1346831]                              |        | 84,59338281 | -0,645949  | <b>-1,56476824</b> | 6,39727999 | 21,1130034 | 4,3298E-06  | 4,11163E-05  | protein_coding |
| ENSMUSG00000048997  | Atxn7l2       | ataxin 7-like 2 [Source:MGI Symbol;Acc:MGI:1919772]                                               |        | 6,89056088  | -0,6471671 | <b>-1,56608998</b> | 2,76449169 | 6,32979346 | 0,011872614 | 0,041835925  | protein_coding |
| ENSMUSG00000052085  | Dock78        | dedicator of cytokinesis 8 [Source:MGI Symbol;Acc:MGI:1921396]                                    |        | 243,6091113 | -0,6481926 | <b>-1,5672036</b>  | 7,92752409 | 19,3786448 | 1,07199E-05 | 9,23038E-05  | protein_coding |
| ENSMUSG00000024143  | Rhoq          | ras homolog gene family, member Q [Source:MGI Symbol;Acc:MGI:1931553]                             |        | 195,5903754 | -0,6491409 | <b>-1,56823409</b> | 7,61175324 | 15,9218549 | 6,60121E-05 | 0,000471877  | protein_coding |
| ENSMUSG00000023004  | Tuba1b        | tubulin, alpha 1B [Source:MGI Symbol;Acc:MGI:107804]                                              |        | 1064,515574 | -0,6492781 | <b>-1,56838323</b> | 10,0559548 | 11,0426699 | 0,000890385 | 0,0004642935 | protein_coding |
| ENSMUSG00000024053  | Emilin2       | elastin microfibril interfacer 2 [Source:MGI Symbol;Acc:MGI:2389136]                              |        | 280,6465501 | -0,6497719 | <b>-1,56892008</b> | 8,13254409 | 17,491149  | 2,88648E-05 | 0,000224602  | protein_coding |
| ENSMUSG00000079165  | Sap25         | sin3 associated polypeptide [Source:MGI Symbol;Acc:MGI:3802945]                                   |        | 20,3777273  | -0,6499459 | <b>-1,56910933</b> | 4,33393156 | 10,7744298 | 0,001029119 | 0,000529038  | protein_coding |
| ENSMUSG00000096581  | Bcl2a1d       | B cell leukemia/lymphoma 2 related protein A1d [Source:MGI Symbol;Acc:MGI:1278325]                |        | 58,66202553 | -0,650192  | <b>-1,56937704</b> | 5,8750183  | 12,7027779 | 0,000365113 | 0,002133428  | protein_coding |
| ENSMUSG000000031604 | Sc4mol        | sterol-C4-methyl oxidase-like [Source:MGI Symbol;Acc:MGI:1913484]                                 |        | 65,98696762 | -0,6507121 | <b>-1,56994288</b> | 6,03894883 | 8,32864378 | 0,003902478 | 0,016478297  | protein_coding |
| ENSMUSG00000075071  | Vimp          | VCP-interacting membrane protein [Source:MGI Symbol;Acc:MGI:95994]                                |        | 59,95169632 | -0,6511081 | <b>-1,57037393</b> | 5,90329509 | 16,8781635 | 3,98575E-05 | 0,000299326  | protein_coding |
| ENSMUSG00000040618  | Pck2          | phosphoenolpyruvate carboxykinase 2 (mitochondrial) [Source:MGI Symbol;Acc:MGI:1860456]           |        | 46,30181884 | -0,6516799 | <b>-1,57099642</b> | 5,51987011 | 13,8958926 | 0,00191322  | 0,001217265  | protein_coding |
| ENSMUSG00000027522  | Stx16         | syntaxin 16 [Source:MGI Symbol;Acc:MGI:1923396]                                                   |        | 99,78458685 | -0,6530281 | <b>-1,57246518</b> | 6,63697268 | 23,170208  | 1,48277E-06 | 1,55006E-05  | protein_coding |
| ENSMUSG00000000290  | Itg2b         | integrin beta 2 [Source:MGI Symbol;Acc:MGI:96611]                                                 |        | 1411,145339 | -0,6531975 | <b>-1,57264981</b> | 10,4625794 | 9,629229   | 0,01091505  | 0,009022578  | protein_coding |
| ENSMUSG00000017713  | Tha1          | threonine aldolase 1 [Source:MGI Symbol;Acc:MGI:1919026]                                          |        | 8,240444063 | -0,6539005 | <b>-1,57341633</b> | 3,03188039 | 6,00533309 | 0,04262701  | 0,048291001  | protein_coding |
| ENSMUSG00000039953  | Clstn1        | calsyntenin 1 [Source:MGI Symbol;Acc:MGI:1929895]                                                 |        | 27,48799706 | -0,6539337 | <b>-1,57345254</b> | 4,76335068 | 20,3943119 | 6,30168E-06 | 5,74713E-05  | protein_coding |
| ENSMUSG00000028936  | Rpl22         | ribosomal protein L22 [Source:MGI Symbol;Acc:MGI:99262]                                           |        | 232,8752203 | -0,6542817 | <b>-1,57383211</b> | 7,86211658 | 19,8036259 | 8,58197E-06 | 7,56743E-05  | protein_coding |
| ENSMUSG00000024858  | Adrbk1        | adrenergic receptor kinase, beta 1 [Source:MGI Symbol;Acc:MGI:87940]                              |        | 546,6426029 | -0,6555733 | <b>-1,57524184</b> | 9,09430343 | 13,7309888 | 0,000210945 | 0,001312375  | protein_coding |
| ENSMUSG00000024594  | Prrc1         | proline-rich coiled-coil 1 [Source:MGI Symbol;Acc:MGI:1916106]                                    |        | 66,3769862  | -0,6563483 | <b>-1,57608824</b> | 6,04743313 | 19,3606978 | 1,08211E-05 | 9,30296E-05  | protein_coding |
| ENSMUSG00000057863  | Rpl36         | ribosomal protein L36 [Source:MGI Symbol;Acc:MGI:1860603]                                         |        | 183,2529118 | -0,6571905 | <b>-1,57700853</b> | 7,51447823 | 21,6591286 | 3,25657E-06 | 3,17479E-05  | protein_coding |
| ENSMUSG00000007892  | Rplp1         | ribosomal protein, large, P1 [Source:MGI Symbol;Acc:MGI:1927099]                                  |        | 1137,173982 | -0,6576063 | <b>-1,57746315</b> | 10,1509515 | 10,9627073 | 0,000929639 | 0,004817898  | protein_coding |
| ENSMUSG00000059970  | Hspa2         | heat shock protein 2 [Source:MGI Symbol;Acc:MGI:96243]                                            |        | 9,663511726 | -0,657977  | <b>-1,57786858</b> | 3,2706802  | 8,50513839 | 0,00354145  | 0,015205123  | protein_coding |
| ENSMUSG00000039987  | Phf2          | putative homeodomain transcription factor 2 [Source:MGI Symbol;Acc:MGI:1916020]                   |        | 77,78782041 | -0,659484  | <b>-1,57851762</b> | 6,28472441 | 25,8148993 | 3,75776E-07 | 4,37821E-06  | protein_coding |
| ENSMUSG00000019952  | Poc1b         | POC1 centriolar protein homolog B (Chlamydomonas) [Source:MGI Symbol;Acc:MGI:1918511]             |        | 21,84631939 | -0,6605727 | <b>-1,58070998</b> | 4,4448667  | 15,5127583 | 8,19503E-05 | 0,000572402  | protein_coding |
| ENSMUSG00000026049  | Tex30         | testis expressed 30 [Source:MGI Symbol;Acc:MGI:1922873]</                                         |        |             |            |                    |            |            |             |              |                |

|                     |               |                                                                                                                  |        |             |            |             |            |            |              |              |                |
|---------------------|---------------|------------------------------------------------------------------------------------------------------------------|--------|-------------|------------|-------------|------------|------------|--------------|--------------|----------------|
| ENSMUSG00000032193  | Ldlr          | low density lipoprotein receptor [Source:MGI Symbol;Acc:MGI:96765]                                               | Sheet1 | 105,3678038 | -0,6637942 | -1,58424363 | 6,71651605 | 6,15968997 | 0,013069411  | 0,045112668  | protein_coding |
| ENSMUSG00000025036  | Sfxn2         | sideroflexin 2 [Source:MGI Symbol;Acc:MGI:2137678]                                                               |        | 16,66894629 | -0,6647014 | -1,58524009 | 4,05129847 | 14,2760156 | 0,000157864  | 0,001019064  | protein_coding |
| ENSMUSG00000031791  | Tmem38a       | transmembrane protein 38A [Source:MGI Symbol;Acc:MGI:1921416]                                                    |        | 8,902317134 | -0,6647896 | -1,58533709 | 3,14660297 | 8,92201946 | 0,002817528  | 0,012527794  | protein_coding |
| ENSMUSG00000027952  | Pmvk          | phosphomevalonate kinase [Source:MGI Symbol;Acc:MGI:1915853]                                                     |        | 16,11538129 | -0,6649618 | -1,58552629 | 3,996177   | 10,8413071 | 0,000992606  | 0,005011632  | protein_coding |
| ENSMUSG00000020143  | Dock2         | dedicator of cyto-kinesis 2 [Source:MGI Symbol;Acc:MGI:2149010]                                                  |        | 602,3672172 | -0,6651227 | -1,58570315 | 9,23414192 | 14,3118146 | 0,00015489   | 0,001003996  | protein_coding |
| ENSMUSG00000062937  | Mtap          | methylthioadenosine phosphorylase [Source:MGI Symbol;Acc:MGI:1914152]                                            |        | 65,12444556 | -0,6655038 | -1,5861221  | 6,02705067 | 25,3538822 | 4,77191E-07  | 5,48995E-06  | protein_coding |
| ENSMUSG00000032434  | Cmt1m6        | CKLF-like MARVEL transmembrane domain containing 6 [Source:MGI Symbol;Acc:MGI:2447165]                           |        | 158,898438  | -0,6659012 | -1,58655901 | 7,31078775 | 20,3630909 | 6,40534E-06  | 5,82578E-05  | protein_coding |
| ENSMUSG00000017664  | Slc35c2       | solute carrier family 35, member C2 [Source:MGI Symbol;Acc:MGI:2385166]                                          |        | 72,43907839 | -0,6664202 | -1,58712988 | 6,17396682 | 25,936322  | 3,52867E-07  | 4,14204E-06  | protein_coding |
| ENSMUSG00000051457  | Spn           | sialophorin [Source:MGI Symbol;Acc:MGI:98384]                                                                    |        | 43,05069532 | -0,6661778 | -1,58796356 | 5,41569961 | 21,034169  | 4,51165E-06  | 4,26621E-05  | protein_coding |
| ENSMUSG00000032320  | Rcn2          | reticulocalbin 2 [Source:MGI Symbol;Acc:MGI:1349765]                                                             |        | 63,25352367 | -0,667194  | -1,58798144 | 5,98114609 | 23,7402363 | 1,10253E-06  | 1,18412E-05  | protein_coding |
| ENSMUSG00000031668  | Eif2ak3       | eukaryotic translation initiation factor 2 alpha kinase 3 [Source:MGI Symbol;Acc:MGI:1341830]                    |        | 25,15303248 | -0,668453  | -1,58936773 | 4,64414829 | 16,3874827 | 5,1625E-05   | 0,0003378641 | protein_coding |
| ENSMUSG00000032041  | Trap          | tolil-interleukin 1 receptor (TIR) domain-containing adaptor protein [Source:MGI Symbol;Acc:MGI:2152213]         |        | 44,11680406 | -0,6684764 | -1,5893935  | 5,4602096  | 16,7498799 | 4,2645E-05   | 0,000317439  | protein_coding |
| ENSMUSG00000032601  | Prkar2a       | protein kinase, cAMP dependent regulatory, type II alpha [Source:MGI Symbol;Acc:MGI:108025]                      |        | 118,3208614 | -0,6693915 | -1,59040198 | 6,88602641 | 22,6743142 | 1,91916E-06  | 1,96397E-05  | protein_coding |
| ENSMUSG00000073422  | H2-Ke6        | H2-K region expressed gene 6 [Source:MGI Symbol;Acc:MGI:95911]                                                   |        | 13,04042087 | -0,6697407 | -1,59078702 | 3,69671286 | 12,4252629 | 0,000423565  | 0,002421284  | protein_coding |
| ENSMUSG00000079197  | Psm2e         | proteasome (prosome, macropain) 28 subunit, beta [Source:MGI Symbol;Acc:MGI:1096365]                             |        | 274,8200343 | -0,6710242 | -1,59220285 | 8,10201148 | 19,3269166 | 1,10143E-05  | 9,46159E-05  | protein_coding |
| ENSMUSG00000008393  | Carhsp1       | calcium regulated heat stable protein 1 [Source:MGI Symbol;Acc:MGI:1196368]                                      |        | 39,16012192 | -0,6717384 | -1,59299127 | 5,28807435 | 20,599213  | 5,67168E-06  | 5,22775E-05  | protein_coding |
| ENSMUSG00000021134  | Srsf5         | serine/arginine-rich splicing factor 5 [Source:MGI Symbol;Acc:MGI:98287]                                         |        | 431,2315316 | -0,6722746 | -1,59258343 | 8,75160028 | 15,4419069 | 8,50805E-05  | 0,000592758  | protein_coding |
| ENSMUSG00000060743  | H3f3a         | H3 histone, family 3A [Source:MGI Symbol;Acc:MGI:1097686]                                                        |        | 568,6865535 | -0,6724394 | -1,59376549 | 9,15143441 | 13,9502291 | 0,000187175  | 0,001188716  | protein_coding |
| ENSMUSG00000032422  | Snx14         | sorting nexin 14 [Source:MGI Symbol;Acc:MGI:2155664]                                                             |        | 53,14798078 | -0,6737219 | -1,595183   | 5,73135022 | 24,6592144 | 6,84168E-07  | 7,16496E-06  | protein_coding |
| ENSMUSG00000069874  | Irgm2         | immunity-related GTPase family M member 2 [Source:MGI Symbol;Acc:MGI:1926262]                                    |        | 109,5254426 | -0,6738843 | -1,59536252 | 6,77422285 | 22,4913028 | 2,11097E-06  | 2,1369E-05   | protein_coding |
| ENSMUSG00000051650  | B3gnt2        | UDP-GlcNAc:betaGal beta-1,3-N-acetylglucosaminyltransferase 2 [Source:MGI Symbol;Acc:MGI:1889505]                |        | 139,4998298 | -0,6746964 | -1,59626078 | 7,12252801 | 13,1009492 | 0,000293873  | 0,001755726  | protein_coding |
| ENSMUSG00000070738  | Dgkd          | diacylglycerol kinase, delta [Source:MGI Symbol;Acc:MGI:2138334]                                                 |        | 146,1801304 | -0,6748744 | -1,59645702 | 7,1902009  | 25,9004324 | 3,59489E-07  | 4,20249E-06  | protein_coding |
| ENSMUSG00000047921  | Trappc9       | trafficking protein particle complex 9 [Source:MGI Symbol;Acc:MGI:1923760]                                       |        | 63,09144682 | -0,6752219 | -1,59684231 | 5,9766169  | 23,6138751 | 1,17736E-06  | 1,25799E-05  | protein_coding |
| ENSMUSG00000039145  | Camk1d        | calcium/calmodulin-dependent protein kinase ID [Source:MGI Symbol;Acc:MGI:2442190]                               |        | 207,9420389 | -0,6771528 | -1,59989095 | 7,69933997 | 16,9166964 | 3,90565E-05  | 0,000293914  | protein_coding |
| ENSMUSG00000001323  | Srr           | serine racemase [Source:MGI Symbol;Acc:MGI:1351636]                                                              |        | 13,96140743 | -0,6776503 | -1,59953248 | 3,79202404 | 12,1198956 | 0,000498867  | 0,002800742  | protein_coding |
| ENSMUSG00000036634  | Mag           | myelin-associated glycoprotein [Source:MGI Symbol;Acc:MGI:96912]                                                 |        | 8,967340255 | -0,6787932 | -1,60080016 | 3,17836173 | 8,98911467 | 0,002715925  | 0,0121399    | protein_coding |
| ENSMUSG00000016529  | Il10          | interleukin 10 [Source:MGI Symbol;Acc:MGI:96537]                                                                 |        | 36,59101276 | -0,6796735 | -1,60177723 | 5,20198473 | 17,5451396 | 2,80567E-05  | 0,00021909   | protein_coding |
| ENSMUSG00000030759  | Far1          | fatty acyl CoA reductase 1 [Source:MGI Symbol;Acc:MGI:1914670]                                                   |        | 81,72528572 | -0,6797257 | -1,60183515 | 6,34880649 | 25,8176058 | 3,7525E-07   | 4,37672E-06  | protein_coding |
| ENSMUSG00000046982  | Tshz1         | teashirt zinc finger family member 1 [Source:MGI Symbol;Acc:MGI:1346031]                                         |        | 14,43464158 | -0,6797427 | -1,60185403 | 3,85065506 | 12,6784471 | 0,000332743  | 0,001958889  | protein_coding |
| ENSMUSG00000040652  | Oaz2          | ornithine decarboxylase antizyme 2 [Source:MGI Symbol;Acc:MGI:109492]                                            |        | 38,43902547 | -0,6798376 | -1,60195941 | 5,25704029 | 20,6070025 | 5,63995E-06  | 5,20194E-05  | protein_coding |
| ENSMUSG00000045969  | Ing1          | inhibitor of growth family, member 1 [Source:MGI Symbol;Acc:MGI:1349481]                                         |        | 23,81169449 | -0,6805908 | -1,60279601 | 4,57245734 | 13,8597165 | 0,000196979  | 0,001235258  | protein_coding |
| ENSMUSG00000033949  | Trim36        | tripartite motif-containing 36 [Source:MGI Symbol;Acc:MGI:106264]                                                |        | 12,49468439 | -0,6809002 | -1,60313978 | 3,63574435 | 11,0619405 | 0,000881179  | 0,004603666  | protein_coding |
| ENSMUSG00000055093  | Gm8430        | predicted pseudogene 8430 [Source:MGI Symbol;Acc:MGI:3645406]                                                    |        | 251,4209375 | -0,681527  | -1,60383641 | 7,97224768 | 20,6354647 | 5,55574E-06  | 5,14245E-05  | pseudogene     |
| ENSMUSG00000058672  | Tubb2a        | tubulin, beta 2A class IIA [Source:MGI Symbol;Acc:MGI:107861]                                                    |        | 221,2477655 | -0,6817982 | -1,60413789 | 7,78965927 | 22,50512   | 2,09584E-06  | 2,12426E-05  | protein_coding |
| ENSMUSG00000032175  | Tyk2          | tyrosine kinase 2 [Source:MGI Symbol;Acc:MGI:1929470]                                                            |        | 116,6717258 | -0,68233   | -1,6047283  | 6,8638927  | 23,6090178 | 1,18033E-06  | 1,25906E-05  | protein_coding |
| ENSMUSG00000048249  | A930001N09Rik | RIKEN cDNA A930001N09 gene [Source:MGI Symbol;Acc:MGI:1924378]                                                   |        | 43,81705829 | -0,6833319 | -1,60584417 | 5,44404961 | 23,8923752 | 1,01874E-06  | 1,10931E-05  | protein_coding |
| ENSMUSG00000032402  | Smad3         | SMAD family member 3 [Source:MGI Symbol;Acc:MGI:1201674]                                                         |        | 46,53046902 | -0,685072  | -1,6077822  | 5,53803704 | 22,4117812 | 2,2002E-06   | 2,21573E-05  | protein_coding |
| ENSMUSG00000083282  | Ctsf          | cathepsin F [Source:MGI Symbol;Acc:MGI:1861434]                                                                  |        | 10,71667899 | -0,6851766 | -1,60789988 | 3,40586308 | 11,1059614 | 0,000860507  | 0,00450853   | protein_coding |
| ENSMUSG00000025453  | Nnt           | nicotinamide nucleotide transhydrogenase [Source:MGI Symbol;Acc:MGI:109279]                                      |        | 65,71267905 | -0,6863921 | -1,60925405 | 6,03571547 | 25,7332142 | 3,92022E-07  | 4,56247E-06  | protein_coding |
| ENSMUSG00000032040  | Dcps          | decaping enzyme, scavenger [Source:MGI Symbol;Acc:MGI:1916555]                                                   |        | 18,33940423 | -0,6865862 | -1,60947056 | 4,19523068 | 16,4172636 | 5,08203E-05  | 0,000374237  | protein_coding |
| ENSMUSG00000044072  | Eml6          | echinoderm microtubule associated protein like 6 [Source:MGI Symbol;Acc:MGI:2442895]                             |        | 15,63548381 | -0,6882357 | -1,61131184 | 3,95521717 | 12,9609218 | 0,000318061  | 0,001880803  | protein_coding |
| ENSMUSG00000031827  | Cotl1         | coactosin-like 1 (Dictyostelium) [Source:MGI Symbol;Acc:MGI:1919292]                                             |        | 927,4319595 | -0,6894716 | -1,61269276 | 9,85680526 | 13,1307789 | 0,000290484  | 0,001739263  | protein_coding |
| ENSMUSG00000024952  | Rps6ka4       | ribosomal protein S6 kinase, polypeptide 4 [Source:MGI Symbol;Acc:MGI:1930076]                                   |        | 93,12800717 | -0,6897129 | -1,61296251 | 6,53686324 | 19,9687903 | 7,87166E-06  | 6,99724E-05  | protein_coding |
| ENSMUSG00000091337  | Eid1          | EP300 interacting inhibitor of differentiation 1 [Source:MGI Symbol;Acc:MGI:1889651]                             |        | 87,96071809 | -0,689866  | -1,61313364 | 6,45298151 | 23,9891127 | 9,6882E-07   | 1,06232E-05  | protein_coding |
| ENSMUSG00000051674  | Dcn11         | DCN1, defective in cullin neddylation 1, domain containing 4 (S. cerevisiae) [Source:MGI Symbol;Acc:MGI:2140972] |        | 13,18639047 | -0,6900078 | -1,61329222 | 3,71465096 | 12,6205946 | 0,00038152   | 0,002217862  | protein_coding |
| ENSMUSG00000041453  | Rpl21         | ribosomal protein L21 [Source:MGI Symbol;Acc:MGI:1278340]                                                        |        | 76,70917757 | -0,6900536 | -1,61334341 | 6,25789913 | 26,0350078 | 3,35282E-07  | 3,95252E-06  | protein_coding |
| ENSMUSG00000087267  | 4933427J07Rik | RIKEN cDNA 4933427J07 gene [Source:MGI Symbol;Acc:MGI:1918470]                                                   |        | 13,13315963 | -0,6901178 | -1,6134153  | 3,69785987 | 10,528532  | 0,001175455  | 0,005889069  | antisense      |
| ENSMUSG00000027247  | Arhgap1       | Rho GTPase activating protein 1 [Source:MGI Symbol;Acc:MGI:2445003]                                              |        | 150,4144105 | -0,690128  | -1,61342665 | 7,23165201 | 23,8447263 | 1,04428E-06  | 1,13023E-05  | protein_coding |
| ENSMUSG00000012848  | Rps5          | ribosomal protein S5 [Source:MGI Symbol;Acc:MGI:1097682]                                                         |        | 520,5931323 | -0,6901686 | -1,61347201 | 9,02340752 | 15,5399152 | 8,07814E-05  | 0,000564596  | protein_coding |
| ENSMUSG00000015363  | Trabd         | TraB domain containing [Source:MGI Symbol;Acc:MGI:1915226]                                                       |        | 73,68661767 | -0,6902322 | -1,61354316 | 6,19975257 | 19,6720936 | 9,19342E-06  | 8,0613E-05   | protein_coding |
| ENSMUSG000000026411 | Tmem9         | transmembrane protein 9 [Source:MGI Symbol;Acc:MGI:1913491]                                                      |        | 31,13145522 | -0,6911508 | -1,61457094 | 4,94874091 | 21,5720704 | 3,40778E-06  | 3,30754E-05  | protein_coding |
| ENSMUSG00000036879  | Phkb          | phosphorylase kinase beta [Source:MGI Symbol;Acc:MGI:97578]                                                      |        | 41,51655703 | -0,6913994 | -1,6148492  | 5,36614763 | 21,4132834 | 3,70198E-06  | 3,56786E-05  | protein_coding |
| ENSMUSG00000096199  | Pthrd1        | peptidyl-tRNA hydrolase domain containing 1 [Source:MGI Symbol;Acc:MGI:1916959]                                  |        | 13,96508797 | -0,6933273 | -1,61700853 | 3,7831961  | 11,6190785 | 0,000652787  | 0,003543565  | protein_coding |
| ENSMUSG00000015355  | Cd48          | CD48 antigen [Source:MGI Symbol;Acc:MGI:88339]                                                                   |        | 136,7660402 | -0,6936996 | -1,61742582 | 7,09528234 | 25,2553062 | 5,02212E-07  | 5,07531E-06  | protein_coding |
| ENSMUSG00000032565  | Nudt16        | nudix (nucleoside diphosphate linked moiety X)-type motif 16 [Source:MGI Symbol;Acc:MGI:1922936]                 |        | 12,60632072 | -0,6938486 | -1,61759296 | 3,63384905 | 11,6897997 | 0,000628437  | 0,003424917  | protein_coding |
| ENSMUSG00000087235  | Gm4750        | predicted gene 4750 [Source:MGI Symbol;Acc:MGI:3647391]                                                          |        | 7,712317382 | -0,6944535 | -1,61827129 | 2,95540191 | 8,20079215 | 0,00418721   | 0,017455262  | pseudogene     |
| ENSMUSG00000087569  | Gm8464        | predicted pseudogene 8464 [Source:MGI Symbol;Acc:MGI:3645517]                                                    |        | 7,712317382 | -0,6944544 | -1,61827234 | 2,95540158 | 8,20050863 | 0,0041787865 | 0,017455262  | pseudogene     |
| ENSMUSG00000097431  |               |                                                                                                                  |        | 12,83558583 | -0,6945405 | -1,61836894 | 3,66573409 | 12,8757329 | 0,00033287   | 0,001958889  | lincRNA        |
| ENSMUSG00000022498  | Txndc11       | thioredoxin domain containing 11 [Source:MGI Symbol;Acc:MGI:1923620]                                             |        | 44,01101682 | -0,6947789 | -1,61863634 | 5,45239074 | 19,9755454 | 7,84389E-06  | 6,98386E-05  | protein_coding |
| ENSMUSG00000030685  | Kctd13        | potassium channel tetramerising domain containing 13 [Source:MGI Symbol;Acc:MGI:1923739]                         |        | 17,97473655 | -0,6964145 | -1,62047248 | 4,15188941 | 14,9875523 | 0,000108223  | 0,000729922  | protein_coding |
| ENSMUSG00000020823  | Sec14l1       | SEC14-like 1 (S. cerevisiae) [Source:MGI Symbol;Acc:MGI:1921386]                                                 |        | 373,9093617 | -0,6974631 | -1,62165067 | 8,54597868 | 17,5534734 | 2,7934E-05   | 0,000218598  | protein_coding |
| ENSMUSG00000014905  | Dnajb9        | DnaJ (Hsp40) homolog, subfamily B, member 9 [Source:MGI Symbol;Acc:MGI:1351618]                                  |        | 46,70242152 | -0,6979925 | -1,62224585 | 5,54431954 | 20,0636581 | 7,49066E-06  | 6,68562E-05  | protein_coding |
| ENSMUSG00000042129  | Rassf4        | Ras association (RalGDS/AF-6) domain family member 4 [Source:MGI Symbol;Acc:MGI:2386853]                         |        | 1568,401556 | -0,6981673 | -1,62244241 | 10,6150594 | 10,111952  | 0,0          |              |                |

|                     |               |                                                                                                 |        |             |            |             |            |            |              |             |                |
|---------------------|---------------|-------------------------------------------------------------------------------------------------|--------|-------------|------------|-------------|------------|------------|--------------|-------------|----------------|
| ENSMUSG000000040563 | BC018242      | cDNA sequence BC018242 [Source:MGI Symbol;Acc:MGI:2384575]                                      | Sheet1 | 18,88299469 | -0,703166  | -1,62807372 | 4,22205747 | 17,8895599 | 2,34102E-05  | 0,00018706  | protein_coding |
| ENSMUSG000000050621 | Gm9846        | predicted gene 9846 [Source:MGI Symbol;Acc:MGI:3704345]                                         |        | 229,8389283 | -0,7036556 | -1,62862632 | 7,8427767  | 21,4007076 | 3,72634E-06  | 3,58819E-05 | protein_coding |
| ENSMUSG000000045000 | Zfp324        | zinc finger protein 324 [Source:MGI Symbol;Acc:MGI:2444641]                                     |        | 9,348784407 | -0,7039222 | -1,62892732 | 3,21187717 | 8,3513154  | 0,003854082  | 0,016292728 | protein_coding |
| ENSMUSG000000047617 | BC029214      | cDNA sequence BC029214 [Source:MGI Symbol;Acc:MGI:2442831]                                      |        | 5,162599073 | -0,7053428 | -1,63053207 | 2,34864251 | 6,14060341 | 0,013211222  | 0,484945116 | protein_coding |
| ENSMUSG000000061983 | Rps12         | ribosomal protein S12 [Source:MGI Symbol;Acc:MGI:981005]                                        |        | 496,178117  | -0,7059017 | -1,63116385 | 8,95415371 | 16,2145679 | 5,65575E-05  | 0,000410977 | protein_coding |
| ENSMUSG000000030042 | Pole4         | polymerase (DNA-directed), epsilon 4 (p12 subunit) [Source:MGI Symbol;Acc:MGI:1914229]          |        | 79,71864753 | -0,7062651 | -1,63157475 | 6,31462325 | 28,9257807 | 7,52053E-08  | 1,02136E-06 | protein_coding |
| ENSMUSG00000001248  | Gramd1a       | GRAM domain containing 1A [Source:MGI Symbol;Acc:MGI:105490]                                    |        | 296,851193  | -0,7063562 | -1,63167781 | 8,2134481  | 18,0058136 | 2,20231E-05  | 0,000177396 | protein_coding |
| ENSMUSG000000091747 | D17H6S56E-5   | DNA segment, Chr 17, human D6S56E 5 [Source:MGI Symbol;Acc:MGI:1306799]                         |        | 64,77327383 | -0,7065302 | -1,63187463 | 5,56000551 | 26,111747  | 3,12221E-07  | 7,38048E-06 | protein_coding |
| ENSMUSG000000046330 | Rp37a         | ribosomal protein L37a [Source:MGI Symbol;Acc:MGI:98066]                                        |        | 321,9371152 | -0,7073063 | -1,63275273 | 8,32922658 | 20,7639943 | 5,19506E-06  | 4,84945E-05 | protein_coding |
| ENSMUSG000000033111 | 3830406C13Rik | RIKEN cDNA 3830406C13 gene [Source:MGI Symbol;Acc:MGI:1917937]                                  |        | 22,8371441  | -0,7082795 | -1,63385454 | 4,51137502 | 19,2959762 | 1,11942E-05  | 5,99236E-05 | protein_coding |
| ENSMUSG00000003429  | Rps11         | ribosomal protein S11 [Source:MGI Symbol;Acc:MGI:1351329]                                       |        | 486,2684177 | -0,7086554 | -1,63428027 | 8,92513003 | 16,3814176 | 5,17905E-05  | 0,000379601 | protein_coding |
| ENSMUSG000000027452 | Acss1         | acyl-CoA synthetase short-chain family member 1 [Source:MGI Symbol;Acc:MGI:1915988]             |        | 28,30467773 | -0,708882  | -1,63453691 | 4,80945241 | 21,2559499 | 4,01861E-06  | 3,84603E-05 | protein_coding |
| ENSMUSG000000024985 | Tcf7l2        | transcription factor 7 like 2, T cell specific, HMG box [Source:MGI Symbol;Acc:MGI:1202879]     |        | 16,16457218 | -0,7090773 | -1,6347583  | 4,01723419 | 17,5489641 | 2,80003E-05  | 0,000218805 | protein_coding |
| ENSMUSG000000026864 | Hspa5         | heat shock protein 5 [Source:MGI Symbol;Acc:MGI:95835]                                          |        | 780,2816957 | -0,7106387 | -1,63652851 | 9,60782136 | 13,6485088 | 0,000220416  | 0,001363578 | protein_coding |
| ENSMUSG00000002395  | Use1          | unconventional SNARE in the ER 1 homolog (S. cerevisiae) [Source:MGI Symbol;Acc:MGI:1914273]    |        | 98,3733278  | -0,7111265 | -1,63708188 | 6,61514665 | 21,7374344 | 3,12631E-06  | 3,06139E-05 | protein_coding |
| ENSMUSG00000000708  | Kat2b         | K(lysine) acetyltransferase 2B [Source:MGI Symbol;Acc:MGI:1343094]                              |        | 60,86086243 | -0,7112685 | -1,63724308 | 5,92567612 | 23,7628961 | 1,08963E-06  | 1,1714E-05  | protein_coding |
| ENSMUSG000000006850 | Tmco6         | transmembrane and coiled-coil domains 6 [Source:MGI Symbol;Acc:MGI:1919233]                     |        | 9,306702334 | -0,7117135 | -1,63275272 | 3,20236814 | 8,77207083 | 0,00305878   | 0,013448104 | protein_coding |
| ENSMUSG000000074505 | Fat3          | FAT tumor suppressor homolog 3 (Drosophila) [Source:MGI Symbol;Acc:MGI:2444314]                 |        | 6,434799909 | -0,713705  | -1,64001044 | 2,65921177 | 7,42984529 | 0,006415086  | 0,025011549 | protein_coding |
| ENSMUSG000000039646 | Vasn          | vasorin [Source:MGI Symbol;Acc:MGI:2177651]                                                     |        | 18,58368962 | -0,7138665 | -1,64019399 | 4,188579   | 18,397967  | 1,79249E-05  | 0,000147411 | protein_coding |
| ENSMUSG000000029580 | Actb          | actin, beta [Source:MGI Symbol;Acc:MGI:87904]                                                   |        | 7517,721048 | -0,7146149 | -1,64104508 | 12,8760694 | 6,83833014 | 0,00892222   | 0,03305072  | protein_coding |
| ENSMUSG000000063001 | Rps23-ps      | ribosomal protein S23, pseudogene [Source:MGI Symbol;Acc:MGI:3705429]                           |        | 496,4561538 | -0,7146581 | -1,6410943  | 8,95494418 | 16,7002428 | 4,37754E-05  | 0,000325193 | pseudogene     |
| ENSMUSG000000030220 | Arhgdib       | Rho, GDP dissociation inhibitor (GDI) beta [Source:MGI Symbol;Acc:MGI:101940]                   |        | 990,1359016 | -0,7154735 | -1,64202205 | 9,9514812  | 12,9704222 | 0,000316451  | 0,00187229  | protein_coding |
| ENSMUSG000000022425 | Enpp2         | ectonucleotide pyrophosphatase/phosphodiesterase 2 [Source:MGI Symbol;Acc:MGI:1321390]          |        | 48,82092697 | -0,7155757 | -1,64213838 | 5,61222248 | 16,0231079 | 6,25741E-05  | 0,000451116 | protein_coding |
| ENSMUSG000000055322 | Tns1          | tensin 1 [Source:MGI Symbol;Acc:MGI:104552]                                                     |        | 78,93518095 | -0,7156765 | -1,64225307 | 6,29409607 | 29,3495975 | 6,04291E-08  | 8,33042E-07 | protein_coding |
| ENSMUSG000000025104 | Hdgfrp3       | hepatoma-derived growth factor, related protein 3 [Source:MGI Symbol;Acc:MGI:1352760]           |        | 9,33445032  | -0,7160798 | -1,64271223 | 3,21484189 | 10,5204113 | 0,001180632  | 0,009512308 | protein_coding |
| ENSMUSG000000020718 | Polg2         | polymerase (DNA directed), gamma 2, accessory subunit [Source:MGI Symbol;Acc:MGI:1354947]       |        | 9,396114198 | -0,7170901 | -1,64386303 | 3,2164509  | 10,6117292 | 0,001123726  | 0,005666073 | protein_coding |
| ENSMUSG000000027808 | Serp1         | stress-associated endoplasmic reticulum protein 1 [Source:MGI Symbol;Acc:MGI:92638]             |        | 224,3313123 | -0,7171005 | -1,64387492 | 11,1320978 | 9,68507516 | 0,001857706  | 0,008809079 | protein_coding |
| ENSMUSG000000027947 | Il6ra         | interleukin 6 receptor, alpha [Source:MGI Symbol;Acc:MGI:105304]                                |        | 499,4561538 | -0,7173072 | -1,64411043 | 5,61857343 | 20,8575012 | 4,94751E-06  | 4,63808E-05 | protein_coding |
| ENSMUSG000000024538 | Ppic          | peptidylprolyl isomerase C [Source:MGI Symbol;Acc:MGI:97751]                                    |        | 29,55733989 | -0,717612  | -1,6444578  | 4,88376628 | 24,0358582 | 9,45582E-07  | 1,04099E-05 | protein_coding |
| ENSMUSG000000021892 | Sh3bp5        | SH3-domain binding protein 5 (BTK-associated) [Source:MGI Symbol;Acc:MGI:1344391]               |        | 346,2336727 | -0,7177015 | -1,6445598  | 8,43523689 | 20,0982245 | 7,35649E-06  | 6,57095E-05 | protein_coding |
| ENSMUSG00000004661  | Arid3b        | AT rich interactive domain 3B (BRIGHT-like) [Source:MGI Symbol;Acc:MGI:1930768]                 |        | 53,30157701 | -0,7186893 | -1,64568628 | 5,73088834 | 25,9866542 | 3,43786E-07  | 4,04408E-06 | protein_coding |
| ENSMUSG000000032841 | Prr5l         | proline rich 5 like [Source:MGI Symbol;Acc:MGI:1919696]                                         |        | 19,37074871 | -0,7196021 | -1,64672781 | 4,26080146 | 16,1961791 | 5,71092E-05  | 0,000414438 | protein_coding |
| ENSMUSG000000069682 | Gm10275       | predicted pseudogene 10275 [Source:MGI Symbol;Acc:MGI:3704354]                                  |        | 572,6138054 | -0,7197648 | -1,64691354 | 9,16088607 | 16,8277625 | 4,09301E-05  | 0,00030571  | protein_coding |
| ENSMUSG000000018669 | Cdk5rap3      | CDK5 regulatory subunit associated protein 3 [Source:MGI Symbol;Acc:MGI:1933126]                |        | 27,86154433 | -0,7198963 | -1,64706368 | 4,79214276 | 18,1007925 | 2,09514E-05  | 0,00017001  | protein_coding |
| ENSMUSG000000090136 | Gm10177       | predicted gene 10177 [Source:MGI Symbol;Acc:MGI:3704330]                                        |        | 67,98940143 | -0,7199431 | -1,64711711 | 6,08112805 | 21,8181877 | 2,99745E-06  | 2,94308E-05 | pseudogene     |
| ENSMUSG000000002043 | Trappc6a      | trafficking protein particle complex 6A [Source:MGI Symbol;Acc:MGI:1914341]                     |        | 16,93943108 | -0,7207906 | -1,64808489 | 4,0640418  | 16,8112277 | 4,12883E-05  | 0,000308176 | protein_coding |
| ENSMUSG000000039031 | Arhgap18      | Rho GTPase activating protein 18 [Source:MGI Symbol;Acc:MGI:1921160]                            |        | 58,81778502 | -0,7213323 | -1,64870391 | 5,87116837 | 28,9160842 | 7,55827E-08  | 1,02395E-06 | protein_coding |
| ENSMUSG000000039001 | Rps21         | ribosomal protein S21 [Source:MGI Symbol;Acc:MGI:1913731]                                       |        | 253,4286729 | -0,7213353 | -1,64870728 | 7,98313765 | 23,1134492 | 1,52719E-06  | 1,59347E-05 | protein_coding |
| ENSMUSG000000030766 | Arhgap17      | Rho GTPase activating protein 17 [Source:MGI Symbol;Acc:MGI:1917747]                            |        | 175,442988  | -0,7217488 | -1,64917989 | 7,45265766 | 27,0566089 | 1,97584E-07  | 2,42282E-06 | protein_coding |
| ENSMUSG000000078453 | 3110003A17Rik | RIKEN cDNA 3110003A17 gene [Source:MGI Symbol;Acc:MGI:1920362]                                  |        | 92,12445305 | -0,7227795 | -1,65035854 | 6,52680645 | 21,6709266 | 3,2366E-06   | 3,15813E-05 | protein_coding |
| ENSMUSG000000041912 | Tdrkh         | tuden and KH domain containing protein [Source:MGI Symbol;Acc:MGI:1919884]                      |        | 15,45038817 | -0,7232292 | -1,65087306 | 3,94941833 | 12,800076  | 0,000346605  | 0,002031014 | protein_coding |
| ENSMUSG000000026670 | Uap1          | UDP-N-acetylglucosamine pyrophosphorylase 1 [Source:MGI Symbol;Acc:MGI:1334459]                 |        | 20,24321102 | -0,7246763 | -1,65252984 | 4,32744972 | 14,9981811 | 0,000107615  | 0,000726714 | protein_coding |
| ENSMUSG000000026311 | Asb1          | ankyrin repeat and SOCS box-containing 1 [Source:MGI Symbol;Acc:MGI:1929735]                    |        | 21,88897401 | -0,7255182 | -1,65349447 | 4,44531541 | 16,3915972 | 5,15131E-05  | 0,000378072 | protein_coding |
| ENSMUSG000000028495 | Rps6          | ribosomal protein S6 [Source:MGI Symbol;Acc:MGI:98159]                                          |        | 63,01023327 | -0,7258703 | -1,65389806 | 5,9721465  | 12,0734414 | 0,000511452  | 0,00286262  | protein_coding |
| ENSMUSG000000024677 | Ms4a6b        | membrane-spanning 4-domains, subfamily A, member 6B [Source:MGI Symbol;Acc:MGI:1917024]         |        | 110,3017162 | -0,7261491 | -1,65421774 | 6,78376052 | 19,3084208 | 1,11215E-05  | 9,54623E-05 | protein_coding |
| ENSMUSG000000049775 | Tmsb4x        | thymosin, beta 4, X chromosome [Source:MGI Symbol;Acc:MGI:99510]                                |        | 938,965     | -0,726206  | -1,65428297 | 13,196436  | 6,37256746 | 0,01158978   | 0,041049938 | protein_coding |
| ENSMUSG00000002983  | Relb          | avian reticuloendotheliosis viral (v-rel) oncogene related B [Source:MGI Symbol;Acc:MGI:103289] |        | 63,60013344 | -0,726355  | -1,6544538  | 5,98819697 | 21,9722615 | 2,7662E-06   | 2,73557E-05 | protein_coding |
| ENSMUSG000000004947 | Dtx2          | deltex 2 homolog (Drosophila) [Source:MGI Symbol;Acc:MGI:1921448]                               |        | 73,94876274 | -0,7278895 | -1,65621445 | 6,2057295  | 21,5119276 | 3,51635E-06  | 3,04689E-05 | protein_coding |
| ENSMUSG000000033713 | Foxn3         | forkhead box N3 [Source:MGI Symbol;Acc:MGI:1918625]                                             |        | 20,54621374 | -0,7286445 | -1,65708148 | 4,34443993 | 17,1998663 | 3,3646E-05   | 0,000257071 | protein_coding |
| ENSMUSG000000046463 | 5930403N24Rik | RIKEN cDNA 5930403N24 gene [Source:MGI Symbol;Acc:MGI:2444171]                                  |        | 5,574586079 | -0,7293586 | -1,65790181 | 2,51515416 | 6,79477734 | 0,000914293  | 0,033718887 | protein_coding |
| ENSMUSG000000013698 | Pea15a        | phosphoprotein enriched in astrocytes 15A [Source:MGI Symbol;Acc:MGI:104799]                    |        | 512,8360872 | -0,7305072 | -1,65929474 | 9,00209099 | 17,0225588 | 3,699383E-05 | 0,000279347 | protein_coding |
| ENSMUSG000000035629 | 1700021K19Rik | RIKEN cDNA 1700021K19 gene [Source:MGI Symbol;Acc:MGI:1915160]                                  |        | 90,93310997 | -0,7308487 | -1,65961513 | 6,50124874 | 24,2019543 | 8,67442E-07  | 9,59691E-06 | protein_coding |
| ENSMUSG000000009927 | Rps25         | ribosomal protein S25 [Source:MGI Symbol;Acc:MGI:1922867]                                       |        | 432,2667631 | -0,7321574 | -1,66112131 | 8,75514461 | 19,5585178 | 9,75648E-06  | 8,48057E-05 | protein_coding |
| ENSMUSG000000046027 | Stard5        | STAR-related lipid transfer (START) domain containing 5 [Source:MGI Symbol;Acc:MGI:2156765]     |        | 119,7897333 | -0,7323294 | -1,66131928 | 6,90650663 | 20,6718713 | 5,45109E-06  | 5,04985E-05 | protein_coding |
| ENSMUSG000000079435 | Rpl36a        | ribosomal protein L36A [Source:MGI Symbol;Acc:MGI:1201789]                                      |        | 198,9995461 | -0,7346988 | -1,66405002 | 7,63489387 | 25,9334278 | 3,53396E-07  | 4,14383E-06 | protein_coding |
| ENSMUSG000000078921 | Ttp2          | T cell specific GTPase 2 [Source:MGI Symbol;Acc:MGI:3710083]                                    |        | 16,44970034 | -0,7354941 | -1,66496757 | 4,04204753 | 14,9444721 | 0,000110722  | 0,000745406 | protein_coding |
| ENSMUSG000000003617 | Gcp2          | ceruloplasmin [Source:MGI Symbol;Acc:MGI:88476]                                                 |        | 256,2345339 | -0,7362618 | -1,66585379 | 8,00130027 | 13,3704692 | 0,000255617  | 0,001554216 | protein_coding |
| ENSMUSG000000023393 | Slc17a9       | solute carrier family 17, member 9 [Source:MGI Symbol;Acc:MGI:1919107]                          |        | 10,37985953 | -0,7372285 | -1,66697036 | 3,36082416 | 10,9708729 | 0,000925552  | 0,004798978 | protein_coding |
| ENSMUSG000000052056 | Zfp217        | zinc finger protein 217 [Source:MGI Symbol;Acc:MGI:2685408]                                     |        | 158,8825964 | -0,7382163 | -1,66811213 | 7,31033836 | 22,118127  | 2,56377E-06  | 2,58842E-05 | protein_coding |
| ENSMUSG000000031310 | Zfmy3         | zinc finger, MYM-type 3 [Source:MGI Symbol;Acc:MGI:1927231]                                     |        | 50,32197668 | -0,7387712 | -1,66875385 | 5,64261315 | 26,1101204 | 3,22489E-07  | 3,83048E-06 | protein_coding |
| ENSMUSG000000038718 | Pbx3          | pre B cell leukemia homeobox 3 [Source:MGI Symbol;Acc:MGI:97496]                                |        | 17,86569502 | -0,7395698 | -1,66967785 | 4,15330828 | 18,385385  | 1,80437E-05  | 0,000148166 | protein_coding |
| ENSMUSG000000044150 | A830080D01Rik | RIKEN cDNA A830080D01 gene [Source:MGI Symbol;Acc:MGI:2685992]                                  |        | 23,64913702 | -0,7402739 | -1,67049291 | 4,55838289 | 22,4657227 | 2,13927E-06  | 2,15833E-05 | protein_coding |

|                    |           |                                                                                                                    |        |              |            |             |            |            |              |             |                      |
|--------------------|-----------|--------------------------------------------------------------------------------------------------------------------|--------|--------------|------------|-------------|------------|------------|--------------|-------------|----------------------|
| ENSMUSG00000024975 | Pdc4      | programmed cell death 4 [Source:MGI Symbol;Acc:MGI:107490]                                                         | Sheet1 | 9,62553015   | -0,7484823 | -1,68002448 | 3,24832542 | 9,1031122  | 0,002551749  | 0,01150906  | protein_coding       |
| ENSMUSG00000024477 | Pgg1b     | protein geranylgeranyltransferase type I, beta subunit [Source:MGI Symbol;Acc:MGI:1917514]                         |        | 54,50962941  | -0,7491777 | -1,6808337  | 5,76475947 | 27,6135247 | 1,481399E-07 | 1,86225E-06 | protein_coding       |
| ENSMUSG00000027639 | Samhd1    | SAM domain and HD domain, 1 [Source:MGI Symbol;Acc:MGI:1927468]                                                    |        | 800,0463275  | -0,7494736 | -1,68117927 | 9,64376278 | 15,0582688 | 0,000104243  | 0,000070742 | protein_coding       |
| ENSMUSG00000024981 | Asc15     | acyl-CoA synthetase long-chain family member 5 [Source:MGI Symbol;Acc:MGI:1919129]                                 |        | 327,0985932  | -0,7512424 | -1,68324181 | 8,35321336 | 17,9115965 | 2,31407E-05  | 0,000185446 | protein_coding       |
| ENSMUSG00000031749 | Slc3gal2  | ST3 beta-galactoside alpha-2,3-sialyltransferase 2 [Source:MGI Symbol;Acc:MGI:99427]                               |        | 55,15600828  | -0,7520113 | -1,68413907 | 5,7779794  | 22,3207655 | 2,30698E-06  | 2,3169E-05  | protein_coding       |
| ENSMUSG00000085334 | Gm12940   | predicted gene 12940 [Source:MGI Symbol;Acc:MGI:3702626]                                                           |        | 6,487255396  | -0,7559833 | -1,6878219  | 2,68471851 | 7,78138736 | 0,005278724  | 0,021221128 | processed_transcript |
| ENSMUSG00000027219 | Slc28a2   | solute carrier family 28 (sodium-coupled nucleoside transporter), member 2 [Source:MGI Symbol;Acc:MGI:1913105]     |        | 119,392611   | -0,7562451 | -1,68908875 | 6,90072023 | 23,1082387 | 1,53133E-06  | 1,59628E-05 | protein_coding       |
| ENSMUSG00000059493 | Nhs       | Nance-Horan syndrome (human) [Source:MGI Symbol;Acc:MGI:2684894]                                                   |        | 45,36099223  | -0,7565728 | -1,6894722  | 5,50215322 | 19,4017972 | 1,05907E-05  | 9,13347E-05 | protein_coding       |
| ENSMUSG00000039936 | Pik3cd    | phosphatidylinositol 3-kinase catalytic delta polypeptide [Source:MGI Symbol;Acc:MGI:1098211]                      |        | 249,7879799  | -0,7573125 | -1,6903389  | 7,96387781 | 20,3960565 | 6,29594E-06  | 5,74713E-05 | protein_coding       |
| ENSMUSG00000072235 | Tuba1a    | tubulin, alpha 1A [Source:MGI Symbol;Acc:MGI:98869]                                                                |        | 92,44680752  | -0,7576767 | -1,69076569 | 6,52714661 | 17,2814634 | 3,22316E-05  | 0,000247989 | protein_coding       |
| ENSMUSG00000035711 | Dok3      | docking protein 3 [Source:MGI Symbol;Acc:MGI:1351490]                                                              |        | 127,6385165  | -0,7578257 | -1,69094033 | 6,99150892 | 24,1597689 | 8,86653E-07  | 9,08078E-06 | protein_coding       |
| ENSMUSG00000031728 | Zfp821    | zinc finger protein 821 [Source:MGI Symbol;Acc:MGI:1923121]                                                        |        | 27,43832056  | -0,7582487 | -1,69143617 | 4,78210191 | 21,89759   | 2,87595E-06  | 2,83137E-05 | protein_coding       |
| ENSMUSG00000067344 | Rps25-ps1 | ribosomal protein S25, pseudogene 1 [Source:MGI Symbol;Acc:MGI:3642902]                                            |        | 19,81846232  | -0,7584461 | -1,69166753 | 4,29749807 | 15,3915486 | 8,73782E-05  | 0,000606459 | pseudogene           |
| ENSMUSG00000015702 | Anxa9     | annexin A9 [Source:MGI Symbol;Acc:MGI:1923711]                                                                     |        | 8,549136451  | -0,7587396 | -1,6920118  | 3,07124668 | 10,3646696 | 0,001284499  | 0,006359977 | protein_coding       |
| ENSMUSG00000093930 | Hmgcs1    | 3-hydroxy-3-methylglutaryl-Coenzyme A synthase 1 [Source:MGI Symbol;Acc:MGI:107592]                                |        | 79,68002064  | -0,7598561 | -1,69332172 | 6,31204052 | 12,3852898 | 0,000432729  | 0,002468535 | protein_coding       |
| ENSMUSG00000001366 | Fbxo9     | f-box protein 9 [Source:MGI Symbol;Acc:MGI:1918788]                                                                |        | 18,39103776  | -0,7600659 | -1,69356803 | 4,18756702 | 20,7661337 | 5,18925E-06  | 4,84816E-05 | protein_coding       |
| ENSMUSG00000025262 | Rps26     | ribosomal protein S26 [Source:MGI Symbol;Acc:MGI:1351628]                                                          |        | 332,9977199  | -0,7610714 | -1,69474871 | 8,3782033  | 21,9883728 | 2,74307E-06  | 2,7176E-05  | protein_coding       |
| ENSMUSG00000030089 | Slc41a3   | solute carrier family 41, member 3 [Source:MGI Symbol;Acc:MGI:1918949]                                             |        | 26,27791998  | -0,7616001 | -1,69536995 | 4,69975822 | 21,5856084 | 3,38381E-06  | 3,293E-05   | protein_coding       |
| ENSMUSG00000020122 | Egfr      | epidermal growth factor receptor [Source:MGI Symbol;Acc:MGI:95294]                                                 |        | 8,604570654  | -0,7618008 | -1,69560584 | 3,09624161 | 9,789652   | 0,001754967  | 0,008412661 | protein_coding       |
| ENSMUSG00000022895 | Ets2      | E26 avian leukemia oncogene 2, 3' domain [Source:MGI Symbol;Acc:MGI:95456]                                         |        | 326,0447119  | -0,7618886 | -1,695709   | 8,34958609 | 20,8805944 | 4,88822E-06  | 4,59033E-05 | protein_coding       |
| ENSMUSG00000022136 | Dnaj3     | DnaJ (Hsp40) homolog, subfamily C, member 3 [Source:MGI Symbol;Acc:MGI:107373]                                     |        | 121,1223693  | -0,7620518 | -1,69590077 | 6,91857234 | 28,2927479 | 1,04286E-07  | 1,36566E-06 | protein_coding       |
| ENSMUSG00000058446 | Znrf2     | zinc and ring finger 2 [Source:MGI Symbol;Acc:MGI:1196246]                                                         |        | 244,8283104  | -0,763125  | -1,69716283 | 7,93507812 | 24,7321402 | 6,58764E-07  | 7,37802E-06 | protein_coding       |
| ENSMUSG00000033467 | Crif2     | cytokine receptor-like factor 2 [Source:MGI Symbol;Acc:MGI:1889506]                                                |        | 77,63027024  | -0,7634616 | -1,69755881 | 6,26958514 | 31,4305678 | 2,06701E-08  | 3,11526E-07 | protein_coding       |
| ENSMUSG00000042249 | Adrbk2    | adrenergic receptor kinase, beta 2 [Source:MGI Symbol;Acc:MGI:87941]                                               |        | 75,28867822  | -0,764001  | -1,69819368 | 6,23107601 | 24,9755035 | 5,80634E-07  | 6,55645E-06 | protein_coding       |
| ENSMUSG00000000958 | Slc7a7    | solute carrier family 7 (cationic amino acid transporter, y+ system), member 7 [Source:MGI Symbol;Acc:MGI:1337120] |        | 58,62492161  | -0,7652614 | -1,69967791 | 5,87278132 | 27,32199   | 1,72241E-07  | 2,14074E-06 | protein_coding       |
| ENSMUSG00000031246 | Sh3bgrl   | SH3-binding domain glutamic acid-rich protein like [Source:MGI Symbol;Acc:MGI:1930849]                             |        | 741,6573282  | -0,7660423 | -1,70059817 | 9,53438104 | 18,3920442 | 1,79807E-05  | 0,000147759 | protein_coding       |
| ENSMUSG00000022365 | Der1      | Der1-like domain family, member 1 [Source:MGI Symbol;Acc:MGI:1915069]                                              |        | 246,900918   | -0,7673664 | -1,70215971 | 7,94675619 | 22,4891349 | 2,11336E-06  | 2,13414E-05 | protein_coding       |
| ENSMUSG00000001467 | Cyp51     | cytochrome P450, family 51 [Source:MGI Symbol;Acc:MGI:106400]                                                      |        | 45,75230432  | -0,7680581 | -1,70297596 | 5,51044199 | 7,35176326 | 0,006699702  | 0,025946841 | protein_coding       |
| ENSMUSG00000045625 | Pigz      | phosphatidylinositol glycan anchor biosynthesis, class Z [Source:MGI Symbol;Acc:MGI:2443822]                       |        | 12,61951567  | -0,7687094 | -1,70374499 | 3,65491457 | 15,3931528 | 8,73041E-05  | 0,000606327 | protein_coding       |
| ENSMUSG00000039115 | Iltga9    | integrin alpha 9 [Source:MGI Symbol;Acc:MGI:104756]                                                                |        | 86,66028459  | -0,7700087 | -1,7053726  | 6,43813534 | 30,1968199 | 3,90349E-08  | 5,99891E-07 | protein_coding       |
| ENSMUSG00000022463 | Sreb2     | sterol regulatory element binding factor 2 [Source:MGI Symbol;Acc:MGI:107585]                                      |        | 147,9789252  | -0,7713936 | -1,70691782 | 7,20637973 | 20,7411042 | 5,25752E-06  | 4,89529E-05 | protein_coding       |
| ENSMUSG00000031328 | Fina      | filamin, alpha [Source:MGI Symbol;Acc:MGI:95556]                                                                   |        | 1988,719419  | -0,7716919 | -1,70727079 | 10,9575789 | 12,5839249 | 0,000389079  | 0,002258219 | protein_coding       |
| ENSMUSG00000020668 | Oat       | ornithine aminotransferase [Source:MGI Symbol;Acc:MGI:97394]                                                       |        | 137,8261725  | -0,7728707 | -1,70866633 | 7,10497048 | 31,3467698 | 2,15817E-08  | 3,24376E-07 | protein_coding       |
| ENSMUSG00000020964 | Mtln1     | sel-1 suppressor of lin-12-like (C. elegans) [Source:MGI Symbol;Acc:MGI:1329016]                                   |        | 292,793671   | -0,773947  | -1,70994155 | 8,19304197 | 23,2106325 | 1,45192E-06  | 1,51927E-05 | protein_coding       |
| ENSMUSG00000030269 | Mtmr14    | myotubularin related protein 14 [Source:MGI Symbol;Acc:MGI:1916075]                                                |        | 94,36673918  | -0,7740922 | -1,71011366 | 6,55943321 | 31,1872167 | 2,34030E-08  | 3,48821E-07 | protein_coding       |
| ENSMUSG00000046546 | Fam43a    | family with sequence similarity 43, member A [Source:MGI Symbol;Acc:MGI:2676309]                                   |        | 31,61548094  | -0,7742059 | -1,71024841 | 4,9750817  | 15,6109652 | 7,78021E-05  | 0,000547956 | protein_coding       |
| ENSMUSG00000067714 | Lpar5     | lyso-phosphatidic acid receptor 5 [Source:MGI Symbol;Acc:MGI:2685918]                                              |        | 13,49167388  | -0,7742107 | -1,71025417 | 3,71894203 | 15,4189757 | 8,61192E-05  | 0,000599234 | protein_coding       |
| ENSMUSG00000045128 | Rpl18a    | ribosomal protein L18A [Source:MGI Symbol;Acc:MGI:1924058]                                                         |        | 292,3968138  | -0,7755729 | -1,71186968 | 8,19012062 | 23,8806561 | 1,02497E-06  | 1,11388E-05 | protein_coding       |
| ENSMUSG00000026187 | Xrcc5     | X-ray repair complementing defective repair in Chinese hamster cells 5 [Source:MGI Symbol;Acc:MGI:104517]          |        | 3,939777764  | -0,7761229 | -1,71252239 | 1,97426019 | 5,95373888 | 0,014686105  | 0,049404848 | protein_coding       |
| ENSMUSG00000031015 | Swap70    | SWA-70 protein [Source:MGI Symbol;Acc:MGI:1298390]                                                                 |        | 241,9847967  | -0,7765529 | -1,71303293 | 7,91786618 | 27,7128061 | 1,40728E-07  | 1,79163E-06 | protein_coding       |
| ENSMUSG00000081344 | Gm14303   | predicted gene 14303 [Source:MGI Symbol;Acc:MGI:3651379]                                                           |        | 65,63684798  | -0,7765641 | -1,71304625 | 6,03203105 | 24,876971  | 6,11081E-07  | 6,8861E-06  | pseudogene           |
| ENSMUSG00000029672 | Fam3c     | family with sequence similarity 3, member C [Source:MGI Symbol;Acc:MGI:107892]                                     |        | 65,44912827  | -0,7767184 | -1,71322942 | 6,02743565 | 32,2743026 | 1,33872E-08  | 2,08632E-07 | protein_coding       |
| ENSMUSG00000005034 | Pirkac    | protein kinase, cAMP dependent, catalytic, beta [Source:MGI Symbol;Acc:MGI:97594]                                  |        | 223,3913217  | -0,7768289 | -1,71336072 | 7,80242117 | 29,7879754 | 4,81972E-08  | 6,79772E-07 | protein_coding       |
| ENSMUSG00000030410 | Dmwd      | dystrophia myotonica-containing WD repeat motif [Source:MGI Symbol;Acc:MGI:94907]                                  |        | 6,600628369  | -0,7786925 | -1,71557532 | 2,81202589 | 7,49150229 | 0,006199082  | 0,024821395 | protein_coding       |
| ENSMUSG00000066152 | Pfc1a2    | solute carrier family 31, member 2 [Source:MGI Symbol;Acc:MGI:1333844]                                             |        | 278,4538689  | -0,7814613 | -1,71887104 | 8,12064916 | 26,0239148 | 3,37214E-07  | 3,97103E-06 | protein_coding       |
| ENSMUSG00000020387 | Phf15     | PHD finger protein 15 [Source:MGI Symbol;Acc:MGI:1924151]                                                          |        | 224,4054446  | -0,7829946 | -1,72069886 | 7,8090106  | 24,7395144 | 6,56248E-07  | 7,36486E-06 | protein_coding       |
| ENSMUSG00000087150 | BC064078  | cDNA sequence BC064078 [Source:MGI Symbol;Acc:MGI:3040692]                                                         |        | 5,083786841  | -0,7834414 | -1,7212318  | 2,3270483  | 6,78766428 | 0,009178993  | 0,033842146 | pseudogene           |
| ENSMUSG00000064363 | mt-Nd4    | mitochondrially encoded NADH dehydrogenase 4 [Source:MGI Symbol;Acc:MGI:102498]                                    |        | 1003,2622116 | -0,7840906 | -1,72200656 | 9,97054526 | 16,8642042 | 4,01517E-05  | 0,000301124 | protein_coding       |
| ENSMUSG00000020668 | Kif3c     | kinesin family member 3C [Source:MGI Symbol;Acc:MGI:107979]                                                        |        | 216,8889826  | -0,7852534 | -1,72339503 | 7,76110344 | 23,5992106 | 1,18636E-06  | 1,26426E-05 | protein_coding       |
| ENSMUSG00000056185 | Snx32     | sorting nexin 32 [Source:MGI Symbol;Acc:MGI:2444704]                                                               |        | 14,46316453  | -0,7855132 | -1,72370535 | 3,83511775 | 14,4009921 | 0,000147724  | 0,000960353 | protein_coding       |
| ENSMUSG00000035199 | Art6ip5   | ADP-ribosylation factor-like 6 interacting protein 5 [Source:MGI Symbol;Acc:MGI:1929501]                           |        | 202,0678457  | -0,7857255 | -1,72395905 | 7,65804273 | 27,014968  | 2,01886E-07  | 2,46732E-06 | protein_coding       |
| ENSMUSG00000038418 | Egr1      | early growth response 1 [Source:MGI Symbol;Acc:MGI:95295]                                                          |        | 8,607834931  | -0,7867311 | -1,72516108 | 3,1031828  | 9,56879159 | 0,00197913   | 0,009284672 | protein_coding       |
| ENSMUSG00000041841 | Rpl37     | ribosomal protein L37 [Source:MGI Symbol;Acc:MGI:1914531]                                                          |        | 112,4732139  | -0,7869164 | -1,72538271 | 6,80919164 | 31,4841808 | 2,01072E-08  | 3,03875E-07 | protein_coding       |
| ENSMUSG00000032047 | Acat1     | acetyl-Coenzyme A acetyltransferase 1 [Source:MGI Symbol;Acc:MGI:87870]                                            |        | 39,99294607  | -0,7884378 | -1,72720315 | 5,31706125 | 27,6109311 | 1,48338E-07  | 1,86256E-06 | protein_coding       |
| ENSMUSG00000018401 | Mtmr4     | myotubularin related protein 4 [Source:MGI Symbol;Acc:MGI:2180699]                                                 |        | 56,29271645  | -0,7895824 | -1,72857404 | 5,81080845 | 27,6357841 | 1,46444E-07  | 1,84728E-06 | protein_coding       |
| ENSMUSG00000036908 | Unc93b1   | unc-93 homolog B1 (C. elegans) [Source:MGI Symbol;Acc:MGI:1859307]                                                 |        | 906,5263951  | -0,7898975 | -1,72895161 | 9,96055077 | 15,2051329 | 9,64409E-05  | 0,000659774 | protein_coding       |
| ENSMUSG00000024949 | Sf1       | splicing factor 1 [Source:MGI Symbol;Acc:MGI:1095403]                                                              |        | 395,8887729  | -0,7903804 | -1,7295304  | 8,25432801 | 23,7917164 | 1,07343E-06  | 1,15853E-05 | protein_coding       |
| ENSMUSG00000014503 | Pkd2l2    | polycystic kidney disease 2-like 2 [Source:MGI Symbol;Acc:MGI:1858231]                                             |        | 5,680514841  | -0,7904847 | -1,72965544 | 2,4734345  | 7,38229879 | 0,006586892  | 0,025572504 | protein_coding       |
| ENSMUSG00000037685 | Atp8a1    | ATPase, aminophospholipid transporter (APLT), class I, type 8A, member 1 [Source:MGI Symbol;Acc:MGI:1330848]       |        | 100,7279502  | -0,7913744 | -1,73072246 | 6,65163876 | 33,8672427 | 5,90044E-09  | 9,74859E-08 | protein_coding       |
| ENSMUSG00000030055 | Rab43     | RAB43, member RAS oncogene family [Source:MGI Symbol;Acc:MGI:1917084]                                              |        | 183,0402721  | -0,7918697 | -1,7313167  | 7,51456464 | 26,5143877 | 2,61583E-07  | 3,15478E-06 | protein_coding       |
| ENSMUSG00000020105 | Slc39a13  | solute carrier family 39 (metal ion transporter), member 13 [Source:MGI Symbol;Acc:MGI:1915677]                    |        | 202,24400171 | -0,7923078 | -1,73184255 | 7,6584573  | 20,2932493 | 6,64346E-06  | 6,02241E-05 | protein_coding       |
| ENSMUSG00000018672 | Cop2      | coatamer protein complex, subunit zeta 2 [Source:MGI Symbol;Acc:MGI:1929008]                                       |        | 56,64673868  | -0,7943455 | -1,73453082 | 2,47820372 | 8,60822934 | 0,003346475  | 0,014498312 | protein_coding       |
| ENSMUSG00000045193 | Cirbp     | cold inducible RNA binding protein [Source:MGI Symbol;Acc:MGI:893588]                                              |        | 19,39422206  | -0,7946099 | -1,734      |            |            |              |             |                      |

|                     |               |                                                                                                        |        |             |            |                    |            |            |              |              |                |
|---------------------|---------------|--------------------------------------------------------------------------------------------------------|--------|-------------|------------|--------------------|------------|------------|--------------|--------------|----------------|
| ENSMUSG00000038608  | Dock10        | dedicator of cytokinesis 10 [Source:MGI Symbol;Acc:MGI:2146320]                                        | Sheet1 | 237,9570389 | -0,7991144 | <b>-1,74003264</b> | 7,89407568 | 32,3598546 | 1,28106E-08  | 2,00213E-07  | protein_coding |
| ENSMUSG00000026126  | Ptpn18        | protein tyrosine phosphatase, non-receptor type 18 [Source:MGI Symbol;Acc:MGI:108410]                  |        | 51,14010217 | -0,7997871 | <b>-1,74083681</b> | 5,66471641 | 30,5391846 | 3,27191E-08  | 4,79953E-07  | protein_coding |
| ENSMUSG00000071415  | Rpl23         | ribosomal protein L23 [Source:MGI Symbol;Acc:MGI:1929455]                                              |        | 762,7061744 | -0,7997951 | <b>-1,74085387</b> | 9,57466901 | 17,875341  | 2,35857E-05  | 0,000188326  | protein_coding |
| ENSMUSG00000030707  | Coro1a        | coronin, actin binding protein 1A [Source:MGI Symbol;Acc:MGI:1345961]                                  |        | 679,784878  | -0,8011493 | <b>-1,74248876</b> | 9,4086435  | 18,3293923 | 1,85818E-05  | 0,000151791  | protein_coding |
| ENSMUSG00000037972  | Snn           | stannin [Source:MGI Symbol;Acc:MGI:1276549]                                                            |        | 8,389801038 | -0,8018581 | <b>-1,74334504</b> | 3,05238306 | 11,291659  | 0,000778561  | 0,004144403  | protein_coding |
| ENSMUSG00000058715  | Fcerg1        | Fc receptor, IgE, high affinity 1, gamma polypeptide [Source:MGI Symbol;Acc:MGI:95496]                 |        | 1087,976483 | -0,8029941 | <b>-1,74471828</b> | 10,087362  | 15,338387  | 8,98717E-05  | 0,00062141   | protein_coding |
| ENSMUSG00000081051  | Gm15427       | predicted pseudogene 15427 [Source:MGI Symbol;Acc:MGI:3642341]                                         |        | 267,4312338 | -0,8041389 | <b>-1,74610325</b> | 8,06107442 | 27,0265529 | 2,0068E-07   | 2,45531E-06  | pseudogene     |
| ENSMUSG00000043940  | Wdfy3         | WD repeat and FYVE domain containing 3 [Source:MGI Symbol;Acc:MGI:1096875]                             |        | 605,614365  | -0,8047499 | <b>-1,74684292</b> | 9,24201835 | 20,1047025 | 7,33162E-06  | 6,565E-05    | protein_coding |
| ENSMUSG00000029174  | Tbc1d1        | TBC1 domain family, member 1 [Source:MGI Symbol;Acc:MGI:1889508]                                       |        | 72,88414531 | -0,8051218 | <b>-1,74729332</b> | 6,18409873 | 35,7018722 | 2,29943E-09  | 4,10179E-08  | protein_coding |
| ENSMUSG00000044162  | Tnip3         | TNFAIP3 interacting protein 3 [Source:MGI Symbol;Acc:MGI:3041165]                                      |        | 159,8452027 | -0,8054973 | <b>-1,74774827</b> | 7,32091443 | 26,0721253 | 3,28898E-07  | 3,88978E-06  | protein_coding |
| ENSMUSG00000031349  | Nsdhl         | NAD(P) dependent steroid dehydrogenase-like [Source:MGI Symbol;Acc:MGI:1099438]                        |        | 25,46535634 | -0,8072546 | <b>-1,74987822</b> | 4,66184184 | 14,1251637 | 0,000117104  | 0,001091301  | protein_coding |
| ENSMUSG00000033685  | Ucp2          | uncoupling protein 2 (mitochondrial, proton carrier) [Source:MGI Symbol;Acc:MGI:109354]                |        | 785,5703503 | -0,8079175 | <b>-1,75068226</b> | 9,61722553 | 17,9998062 | 2,20927E-05  | 0,000177826  | protein_coding |
| ENSMUSG00000032652  | Creb1         | cAMP responsive element binding protein-like 2 [Source:MGI Symbol;Acc:MGI:1889385]                     |        | 24,02202024 | -0,808298  | <b>-1,75114429</b> | 4,57503703 | 20,0347744 | 7,60466E-06  | 6,78185E-05  | protein_coding |
| ENSMUSG00000020321  | Mdh1          | malate dehydrogenase 1, NAD (soluble) [Source:MGI Symbol;Acc:MGI:97051]                                |        | 201,2274311 | -0,8086842 | <b>-1,75161316</b> | 7,65212715 | 34,2744376 | 4,78627E-09  | 8,01517E-08  | protein_coding |
| ENSMUSG00000025732  | Fam195a       | family with sequence similarity 195, member A [Source:MGI Symbol;Acc:MGI:1915491]                      |        | 6,60842781  | -0,8088751 | <b>-1,75184501</b> | 2,6983698  | 9,1774353  | 0,002450171  | 0,01142397   | protein_coding |
| ENSMUSG00000006333  | Rps9          | ribosomal protein S9 [Source:MGI Symbol;Acc:MGI:1924096]                                               |        | 693,2389835 | -0,8092056 | <b>-1,75224635</b> | 9,43672778 | 17,0404788 | 3,65914E-05  | 0,000277071  | protein_coding |
| ENSMUSG00000006442  | Srm           | spermidine synthase [Source:MGI Symbol;Acc:MGI:102609]                                                 |        | 40,04337807 | -0,8092997 | <b>-1,75212604</b> | 5,31911343 | 28,5345723 | 9,20403E-08  | 1,2169E-06   | protein_coding |
| ENSMUSG00000004317  | Cln5          | chloride channel 5 [Source:MGI Symbol;Acc:MGI:99486]                                                   |        | 135,2385888 | -0,8106489 | <b>-1,75400002</b> | 7,0785009  | 25,9001222 | 3,95946E-07  | 4,20249E-06  | protein_coding |
| ENSMUSG00000021311  | Mtr           | 5-methyltetrahydrofolate-homocysteine methyltransferase [Source:MGI Symbol;Acc:MGI:894292]             |        | 163,1780656 | -0,810726  | <b>-1,75409388</b> | 7,34947842 | 34,2717422 | 4,79291E-09  | 8,01571E-08  | protein_coding |
| ENSMUSG00000001270  | Ckb           | creatine kinase, brain [Source:MGI Symbol;Acc:MGI:88407]                                               |        | 488,345337  | -0,8125997 | <b>-1,7563735</b>  | 8,93111113 | 24,1688194 | 8,82496E-07  | 7,7447E-06   | protein_coding |
| ENSMUSG00000007029  | Vars          | valyl-tRNA synthetase [Source:MGI Symbol;Acc:MGI:90675]                                                |        | 105,783746  | -0,8143704 | <b>-1,7558306</b>  | 6,72082993 | 33,7799462 | 6,177117E-09 | 1,01047E-07  | protein_coding |
| ENSMUSG00000094856  | Gm17316       | predicted gene, 17316 [Source:MGI Symbol;Acc:MGI:4936950]                                              |        | 8,26470372  | -0,8154126 | <b>-1,75980131</b> | 3,02382618 | 8,61062362 | 0,00342079   | 0,014484977  | protein_coding |
| ENSMUSG00000058793  | Cds2          | CDP-diacylglycerol synthase (phosphatidate cytidylyltransferase) 2 [Source:MGI Symbol;Acc:MGI:1332236] |        | 321,9005356 | -0,8154922 | <b>-1,75989852</b> | 8,32959639 | 28,7811548 | 8,10358E-08  | 1,08314E-06  | protein_coding |
| ENSMUSG00000003206  | Ebi3          | Epstein-Barr virus induced gene 3 [Source:MGI Symbol;Acc:MGI:1354171]                                  |        | 261,5440388 | -0,8157544 | <b>-1,76120183</b> | 8,03008139 | 22,8682645 | 1,73493E-06  | 1,79151E-05  | protein_coding |
| ENSMUSG00000032589  | Bsn           | bassoon [Source:MGI Symbol;Acc:MGI:1277955]                                                            |        | 35,4530684  | -0,8165064 | <b>-1,76113607</b> | 5,12975729 | 33,4618067 | 7,26772E-09  | 1,17774E-07  | protein_coding |
| ENSMUSG00000060036  | Rpl3          | ribosomal protein L3 [Source:MGI Symbol;Acc:MGI:1351605]                                               |        | 771,7869024 | -0,8173758 | <b>-1,76219773</b> | 9,59179798 | 17,226812  | 3,31722E-05  | 0,000253981  | protein_coding |
| ENSMUSG00000079641  | Rpl39         | ribosomal protein L39 [Source:MGI Symbol;Acc:MGI:1914498]                                              |        | 342,4493313 | -0,8174647 | <b>-1,76230628</b> | 8,41890959 | 23,8167788 | 1,05955E-06  | 1,14467E-05  | protein_coding |
| ENSMUSG00000026727  | Rsu1          | Ras suppressor protein 1 [Source:MGI Symbol;Acc:MGI:103040]                                            |        | 122,4500831 | -0,8176305 | <b>-1,76250887</b> | 6,93504616 | 34,5625017 | 4,12782E-09  | 6,99882E-08  | protein_coding |
| ENSMUSG00000034731  | Dgkh          | dihydroxyacetone kinase, eta [Source:MGI Symbol;Acc:MGI:2444188]                                       |        | 44,04835597 | -0,8178221 | <b>-1,76274288</b> | 5,46446617 | 29,3688926 | 5,98304E-08  | 8,28165E-07  | protein_coding |
| ENSMUSG00000033450  | Tagap         | T cell activation Rho GTPase activating protein [Source:MGI Symbol;Acc:MGI:3615484]                    |        | 119,3825986 | -0,818096  | <b>-1,76270761</b> | 6,8974629  | 23,5300872 | 1,22976E-06  | 1,17729E-05  | protein_coding |
| ENSMUSG00000002346  | Slc25a42      | solute carrier family 25, member 42 [Source:MGI Symbol;Acc:MGI:1920345]                                |        | 4,959244347 | -0,8190776 | <b>-1,76427763</b> | 2,29682917 | 7,94760455 | 0,004815107  | 0,019581555  | protein_coding |
| ENSMUSG00000040586  | Ofd1          | oral-facial-digital syndrome 1 gene homolog (human) [Source:MGI Symbol;Acc:MGI:1350328]                |        | 29,44675575 | -0,8208187 | <b>-1,76400815</b> | 4,87748824 | 28,8743516 | 7,72288E-08  | 1,0424E-06   | protein_coding |
| ENSMUSG00000056091  | Sl3gal5       | ST3 beta-galactoside alpha-2,3-sialyltransferase 5 [Source:MGI Symbol;Acc:MGI:1339963]                 |        | 70,89973432 | -0,8213024 | <b>-1,76700048</b> | 6,15265849 | 39,6248965 | 3,07735E-10  | 6,39147E-09  | protein_coding |
| ENSMUSG00000002885  | Cd97          | CD97 antigen [Source:MGI Symbol;Acc:MGI:1347095]                                                       |        | 125,5640511 | -0,8213346 | <b>-1,76703985</b> | 6,97459878 | 32,41093   | 1,24783E-08  | 1,95576E-07  | protein_coding |
| ENSMUSG00000079470  | Utp14b        | UTP14, U3 small nucleolar ribonucleoprotein, homolog B (yeast) [Source:MGI Symbol;Acc:MGI:2445092]     |        | 10,00501442 | -0,8221637 | <b>-1,76805566</b> | 3,29961068 | 9,30523512 | 0,002285     | 0,010504307  | protein_coding |
| ENSMUSG000000066233 | Tmem42        | transmembrane protein 42 [Source:MGI Symbol;Acc:MGI:1277176]                                           |        | 5,85634867  | -0,8224825 | <b>-1,76844638</b> | 2,51804378 | 8,38541033 | 0,003782448  | 0,016081539  | protein_coding |
| ENSMUSG00000064061  | Dzip3         | DAZ interacting protein 3, zinc finger [Source:MGI Symbol;Acc:MGI:1917433]                             |        | 22,9706537  | -0,8226645 | <b>-1,76866953</b> | 4,51288351 | 21,0552738 | 4,46223E-06  | 4,22642E-05  | protein_coding |
| ENSMUSG00000037999  | Arap2         | ArfGAP with RhoGAP domain, ankyrin repeat and PH domain 2 [Source:MGI Symbol;Acc:MGI:2684416]          |        | 65,65104667 | -0,8234458 | <b>-1,76962762</b> | 6,03562456 | 39,2886904 | 3,65553E-10  | 4,74791E-09  | protein_coding |
| ENSMUSG00000040430  | Pitpcn1       | phosphatidylinositol transfer protein, cytoplasmic 1 [Source:MGI Symbol;Acc:MGI:1919045]               |        | 328,6220991 | -0,8234624 | <b>-1,76964797</b> | 8,35988256 | 24,3191427 | 8,16239E-07  | 9,08613E-06  | protein_coding |
| ENSMUSG00000064141  | Zfp69         | zinc finger protein 69 [Source:MGI Symbol;Acc:MGI:107794]                                              |        | 3,634825521 | -0,8235948 | <b>-1,76981036</b> | 1,84322322 | 6,01090364 | 0,014217745  | 0,048168474  | protein_coding |
| ENSMUSG00000022091  | Sorbs3        | sorbin and SH3 domain containing 3 [Source:MGI Symbol;Acc:MGI:700013]                                  |        | 25,98617975 | -0,8238088 | <b>-1,77007295</b> | 4,68668937 | 24,0302908 | 9,4823E-07   | 1,04283E-05  | protein_coding |
| ENSMUSG00000060791  | Gmf3          | glia maturation factor, gamma [Source:MGI Symbol;Acc:MGI:1927135]                                      |        | 81,71960882 | -0,8242668 | <b>-1,7706349</b>  | 6,35131286 | 26,8777929 | 2,16735E-07  | 2,63706E-06  | protein_coding |
| ENSMUSG00000000686  | Abhd15        | abhydrolase domain containing 15 [Source:MGI Symbol;Acc:MGI:1914727]                                   |        | 4,569524419 | -0,8246324 | <b>-1,77108374</b> | 2,15636716 | 6,56667492 | 0,01039059   | 0,037528406  | protein_coding |
| ENSMUSG00000024248  | Cox7a2l       | cytochrome c oxidase subunit VIIa polypeptide 2-like [Source:MGI Symbol;Acc:MGI:106015]                |        | 195,3819    | -0,8270416 | <b>-1,77404376</b> | 7,60815126 | 27,436012  | 1,62379E-07  | 2,02540E-06  | protein_coding |
| ENSMUSG00000065947  | mt-Nd4l       | mitochondrially encoded NADH dehydrogenase 4L [Source:MGI Symbol;Acc:MGI:102497]                       |        | 83,23003646 | -0,8280507 | <b>-1,77528505</b> | 6,38124257 | 38,8448185 | 4,5887E-10   | 9,26637E-09  | protein_coding |
| ENSMUSG00000067736  | Gm10222       | predicted gene 10222 [Source:MGI Symbol;Acc:MGI:3642643]                                               |        | 83,23003646 | -0,8280513 | <b>-1,77528582</b> | 6,38124237 | 38,8415051 | 4,5965E-10   | 9,26637E-09  | protein_coding |
| ENSMUSG00000086841  | 2410006H16Rik | RIKEN cDNA 2410006H16 gene [Source:MGI Symbol;Acc:MGI:1916471]                                         |        | 13,47604752 | -0,8282939 | <b>-1,77558429</b> | 3,71878092 | 17,121264  | 3,50675E-05  | 0,000266634  | lincRNA        |
| ENSMUSG00000034252  | Senp6         | SUMO/sentrin specific peptidase 6 [Source:MGI Symbol;Acc:MGI:1922075]                                  |        | 147,5893894 | -0,8290017 | <b>-1,77645568</b> | 7,20363742 | 33,5921375 | 6,79669E-09  | 1,10466E-07  | protein_coding |
| ENSMUSG00000008682  | Rpl10         | ribosomal protein L10 [Source:MGI Symbol;Acc:MGI:105943]                                               |        | 529,0511044 | -0,8292885 | <b>-1,77680884</b> | 9,04668625 | 20,6306769 | 5,56965E-06  | 5,10599E-05  | protein_coding |
| ENSMUSG00000085586  | Gm11613       | predicted gene 11613 [Source:MGI Symbol;Acc:MGI:3651819]                                               |        | 9,835056379 | -0,8309434 | <b>-1,77884824</b> | 3,27482039 | 14,7566045 | 0,000122318  | 0,000815212  | lincRNA        |
| ENSMUSG00000069662  | Marcks        | myristoylated alanine rich protein kinase C substrate [Source:MGI Symbol;Acc:MGI:96907]                |        | 715,8908183 | -0,8318963 | <b>-1,78002349</b> | 9,48344446 | 16,2246212 | 5,62582E-05  | 0,000409615  | protein_coding |
| ENSMUSG000000061477 | Rps7          | ribosomal protein S7 [Source:MGI Symbol;Acc:MGI:1333818]                                               |        | 401,1077967 | -0,8325839 | <b>-1,78087209</b> | 8,64664737 | 22,5952903 | 1,99974E-06  | 2,03625E-05  | protein_coding |
| ENSMUSG00000042292  | Mkl1          | MKL (megakaryoblastic leukemia)/myocardin-like 1 [Source:MGI Symbol;Acc:MGI:2384495]                   |        | 132,2382069 | -0,8331069 | <b>-1,78151784</b> | 7,04267051 | 35,2487633 | 2,90166E-09  | 5,02848E-08  | protein_coding |
| ENSMUSG000000031129 | Slc9a9        | solute carrier family 9 (sodium/hydrogen exchanger), member 9 [Source:MGI Symbol;Acc:MGI:2679732]      |        | 91,26202754 | -0,8337619 | <b>-1,78356262</b> | 6,51070275 | 32,6716007 | 1,09111E-08  | 1,12738E-07  | protein_coding |
| ENSMUSG00000031925  | Maml2         | mastermind like 2 (Drosophila) [Source:MGI Symbol;Acc:MGI:2389460]                                     |        | 19,40245057 | -0,8349505 | <b>-1,78379579</b> | 4,26413698 | 26,4112815 | 2,75924E-07  | 3,32004E-06  | protein_coding |
| ENSMUSG000000030331 | Cdkn1b        | cyclin-dependent kinase inhibitor 1B [Source:MGI Symbol;Acc:MGI:104565]                                |        | 45,04947056 | -0,8350921 | <b>-1,78397095</b> | 5,48655035 | 27,4114123 | 1,64458E-07  | 2,04864E-06  | protein_coding |
| ENSMUSG00000024597  | Slc12a2       | solute carrier family 12, member 2 [Source:MGI Symbol;Acc:MGI:101924]                                  |        | 20,22451588 | -0,8352292 | <b>-1,78414051</b> | 4,3157698  | 23,0390989 | 1,5874E-06   | 1,65159E-05  | protein_coding |
| ENSMUSG00000026548  | Slamf9        | SLAM family member 9 [Source:MGI Symbol;Acc:MGI:1923692]                                               |        | 322,0262105 | -0,8357482 | <b>-1,78478241</b> | 8,33121267 | 29,30787   | 6,17444E-08  | 8,50108E-07  | protein_coding |
| ENSMUSG00000073702  | Rpl31         | ribosomal protein L31 [Source:MGI Symbol;Acc:MGI:2149632]                                              |        | 18,42082005 | -0,8359434 | <b>-1,78502387</b> | 4,18350577 | 23,8823407 | 1,02407E-06  | 1,11388E-05  | protein_coding |
| ENSMUSG000000025150 | Chr2          | carboxyl reductase 2 [Source:MGI Symbol;Acc:MGI:107200]                                                |        | 5,682435729 | -0,8361612 | <b>-1,78529342</b> | 2,49933865 | 8,37365717 | 0,003806987  | 0,0016155802 | protein_coding |
| ENSMUSG00000096643  | Gm17312       | predicted gene, 17312 [Source:MGI Symbol;Acc:MGI:4936946]                                              |        | 6,446226372 | -0,8383615 | <b>-1,78801835</b> | 2,67465125 | 9,50658193 | 0,002047362  | 0,00956393   | protein_coding |
| ENSMUSG000000057841 | Rpl32         | ribosomal protein L32 [Source:MGI Symbol;Acc:MGI:98038]                                                |        | 613,75      |            |                    |            |            |              |              |                |



|                    |               |                                                                                                                       |             |            |              |            |            |             |              |                |
|--------------------|---------------|-----------------------------------------------------------------------------------------------------------------------|-------------|------------|--------------|------------|------------|-------------|--------------|----------------|
| ENSMUSG00000042608 | Stk40         | serine/threonine kinase 40 [Source:MGI Symbol;Acc:MGI:1921428]                                                        | 118,0769613 | -0,8496561 | -1,80207127  | 6,88193007 | 25,6537078 | 4,0851E-07  | 4,72037E-06  | protein_coding |
| ENSMUSG00000066677 | Pydc3         | pyrin domain containing 3 [Source:MGI Symbol;Acc:MGI:2442822]                                                         | 8,100218597 | -0,8509828 | -1,8037292   | 3,02032775 | 10,3950776 | 0,001263517 | 0,006275886  | protein_coding |
| ENSMUSG00000030474 | Siglec3       | sialic acid binding Ig-like lectin E [Source:MGI Symbol;Acc:MGI:1932475]                                              | 275,1176336 | -0,8514662 | -1,80433371  | 8,10373601 | 19,8133974 | 8,53821E-06 | 7,53489E-05  | protein_coding |
| ENSMUSG00000030067 | Foxp1         | forkhead box P1 [Source:MGI Symbol;Acc:MGI:1914004]                                                                   | 167,6585122 | -0,851474  | -1,80434347  | 7,38891193 | 33,4028321 | 7,49148E-09 | 1,21221E-07  | protein_coding |
| ENSMUSG00000041040 | Fam117b       | family with sequence similarity 117, member B [Source:MGI Symbol;Acc:MGI:1920000]                                     | 61,50818256 | -0,8515617 | -1,80445321  | 5,93679049 | 32,4636578 | 1,21442E-08 | 1,90613E-07  | protein_coding |
| ENSMUSG00000036501 | Fam13b        | family with sequence similarity 13, member B [Source:MGI Symbol;Acc:MGI:2447834]                                      | 66,16659749 | -0,8529727 | -1,80621884  | 6,0419527  | 30,1050157 | 4,09271E-08 | 5,83225E-07  | protein_coding |
| ENSMUSG00000031390 | Avpr2         | arginine vasopressin receptor 2 [Source:MGI Symbol;Acc:MGI:88123]                                                     | 10,4451573  | -0,8530389 | -1,80630173  | 3,36544442 | 12,3524246 | 0,000440414 | 0,002505867  | protein_coding |
| ENSMUSG00000041483 | Zfp281        | zinc finger protein 281 [Source:MGI Symbol;Acc:MGI:3029290]                                                           | 90,25342904 | -0,8531261 | -1,8064109   | 6,49415075 | 35,6613938 | 2,34771E-09 | 4,18059E-08  | protein_coding |
| ENSMUSG00000076431 | Sox4          | SRY-box containing gene 4 [Source:MGI Symbol;Acc:MGI:983866]                                                          | 3,567541387 | -0,8539666 | -1,807746364 | 1,83954464 | 6,87642537 | 0,008734007 | 0,03244102   | protein_coding |
| ENSMUSG00000026663 | Atf6          | activating transcription factor 6 [Source:MGI Symbol;Acc:MGI:1926157]                                                 | 179,9374224 | -0,8547094 | -1,80839449  | 7,49082626 | 33,6010049 | 6,76578E-09 | 1,10127E-07  | protein_coding |
| ENSMUSG00000097077 |               |                                                                                                                       | 10,355268   | -0,8556792 | -1,80961044  | 3,36400225 | 11,1621904 | 0,000834813 | 0,00438856   | lincRNA        |
| ENSMUSG00000037822 | 1110003E01Rik | RIKEN cDNA 1110003E01 gene [Source:MGI Symbol;Acc:MGI:1915802]                                                        | 155,161007  | -0,8563148 | -1,81040792  | 7,27297754 | 31,2596207 | 2,25726E-08 | 3,36964E-07  | protein_coding |
| ENSMUSG00000097347 |               |                                                                                                                       | 13,29353872 | -0,8572826 | -1,81162278  | 3,71692286 | 17,2548062 | 3,2687E-05  | 0,00025079   | lincRNA        |
| ENSMUSG00000017707 | Serinc3       | serine incorporator 3 [Source:MGI Symbol;Acc:MGI:1349457]                                                             | 1081,031198 | -0,8585408 | -1,81320346  | 10,078071  | 18,3294004 | 1,85817E-05 | 0,000151791  | protein_coding |
| ENSMUSG00000038481 | Cdk19         | cyclin-dependent kinase 19 [Source:MGI Symbol;Acc:MGI:1925584]                                                        | 182,8720183 | -0,8604438 | -1,81559678  | 7,51310123 | 34,022342  | 5,44829E-09 | 9,05603E-08  | protein_coding |
| ENSMUSG00000019876 | Pkib          | protein kinase inhibitor beta, cAMP dependent, testis specific [Source:MGI Symbol;Acc:MGI:101937]                     | 38,69246896 | -0,8613527 | -1,81674094  | 5,26628998 | 29,0282723 | 7,13297E-08 | 9,72331E-07  | protein_coding |
| ENSMUSG00000022292 | Rrm2b         | ribonucleotide reductase M2 B (TP53 inducible) [Source:MGI Symbol;Acc:MGI:2155865]                                    | 26,8685305  | -0,8613944 | -1,81679344  | 4,74139839 | 32,5631637 | 1,15381E-08 | 1,81787E-07  | protein_coding |
| ENSMUSG00000035847 | Ids           | iduronate 2-sulfatase [Source:MGI Symbol;Acc:MGI:96417]                                                               | 107,5466933 | -0,8628955 | -1,81668471  | 6,74462972 | 38,8752732 | 4,51767E-10 | 9,15787E-09  | protein_coding |
| ENSMUSG00000058443 | Rpl10-ps3     | ribosomal protein L10, pseudogene 3 [Source:MGI Symbol;Acc:MGI:3704336]                                               | 561,2135631 | -0,8676484 | -1,82468625  | 9,13189867 | 21,2226064 | 4,08913E-06 | 3,91021E-05  | protein_coding |
| ENSMUSG00000039007 | Pgcp          | plasma glutamate carboxypeptidase [Source:MGI Symbol;Acc:MGI:1889205]                                                 | 46,84625736 | -0,8677427 | -1,82480553  | 5,54487658 | 38,7297905 | 4,86724E-10 | 9,47088E-09  | protein_coding |
| ENSMUSG00000036452 | Arhgap26      | Rho GTPase activating protein 26 [Source:MGI Symbol;Acc:MGI:1918552]                                                  | 61,66263072 | -0,8698825 | -1,8275141   | 5,94567037 | 26,9526247 | 2,08504E-07 | 5,244254E-06 | protein_coding |
| ENSMUSG00000032018 | Sc5d          | sterol-C5-desaturase (fungal ERG3, delta-5-desaturase) homolog (S. cerevisiae) [Source:MGI Symbol;Acc:MGI:1353611]    | 37,80850977 | -0,8707437 | -1,82806534  | 5,23219488 | 15,9497157 | 6,50475E-05 | 0,000466195  | protein_coding |
| ENSMUSG00000074671 | Tsyp13        | TSPY-like 3 [Source:MGI Symbol;Acc:MGI:2139328]                                                                       | 21,01111998 | -0,8714851 | -1,82954525  | 4,380145   | 20,3806447 | 6,34685E-06 | 5,78216E-05  | protein_coding |
| ENSMUSG00000021203 | Otub2         | OTU domain, ubiquitin aldehyde binding 2 [Source:MGI Symbol;Acc:MGI:1915399]                                          | 11,22728106 | -0,872107  | -1,83033408  | 3,49757668 | 18,3327344 | 1,85492E-05 | 0,000151791  | protein_coding |
| ENSMUSG00000061604 | Gm11518       | predicted gene 11518 [Source:MGI Symbol;Acc:MGI:3650306]                                                              | 244,2079514 | -0,8723264 | -1,83176745  | 7,93023792 | 25,2411941 | 5,059E-07   | 7,5839E-06   | pseudogene     |
| ENSMUSG00000026786 | Apb1ip        | amyloid beta (A4) precursor protein-binding, family B, member 1 interacting protein [Source:MGI Symbol;Acc:MGI:18613] | 672,920734  | -0,8749738 | -1,83397476  | 9,39408144 | 21,7032142 | 3,18258E-06 | 3,11094E-05  | protein_coding |
| ENSMUSG00000036587 | Fut7          | fucosyltransferase 7 [Source:MGI Symbol;Acc:MGI:107692]                                                               | 3,544335005 | -0,8750257 | -1,83404079  | 1,8217625  | 7,45153838 | 0,006338225 | 0,024747009  | protein_coding |
| ENSMUSG00000078716 | Tmem8b        | transmembrane protein 8B [Source:MGI Symbol;Acc:MGI:2441680]                                                          | 5,682023059 | -0,875295  | -1,83468129  | 2,4958879  | 8,31899858 | 0,003923254 | 0,016540597  | protein_coding |
| ENSMUSG00000021870 | Slmap         | sarcolemma associated protein [Source:MGI Symbol;Acc:MGI:1933549]                                                     | 173,2952014 | -0,8761166 | -1,83542814  | 7,43542625 | 41,1762234 | 1,39104E-04 | 3,02642E-09  | protein_coding |
| ENSMUSG00000036067 | Slc2a6        | solute carrier family 2 (facilitated glucose transporter), member 6 [Source:MGI Symbol;Acc:MGI:2443286]               | 45,1029185  | -0,8764349 | -1,83583315  | 5,48689187 | 15,9498604 | 6,50246E-05 | 0,000466195  | protein_coding |
| ENSMUSG00000032997 | Chpf          | chondroitin polymerizing factor [Source:MGI Symbol;Acc:MGI:106576]                                                    | 29,75391756 | -0,8776387 | -1,8373656   | 4,89627619 | 30,4132114 | 3,49142E-08 | 5,07411E-07  | protein_coding |
| ENSMUSG00000072653 | Zfp783        | zinc finger protein 783 [Source:MGI Symbol;Acc:MGI:3040704]                                                           | 7,565009317 | -0,8777666 | -1,83752849  | 2,89798109 | 12,9852677 | 0,000313948 | 0,001860491  | pseudogene     |
| ENSMUSG00000026004 | Kans11        | KAT8 regulatory NSL complex subunit 1-like [Source:MGI Symbol;Acc:MGI:1915941]                                        | 28,94121067 | -0,8782371 | -1,83812786  | 4,85465531 | 33,8527911 | 5,94437E-09 | 9,80643E-08  | protein_coding |
| ENSMUSG00000030088 | Aldh11        | aldehyde dehydrogenase 1 family, member L1 [Source:MGI Symbol;Acc:MGI:1340024]                                        | 16,75321892 | -0,8783431 | -1,83826289  | 4,04438902 | 15,8178404 | 6,97418E-05 | 0,000495957  | protein_coding |
| ENSMUSG00000025823 | Pdia4         | protein disulfide isomerase associated 4 [Source:MGI Symbol;Acc:MGI:104864]                                           | 139,1027438 | -0,878456  | -1,83840675  | 7,1187154  | 31,3343306 | 2,17205E-08 | 3,26015E-07  | protein_coding |
| ENSMUSG00000034892 | Rps29         | ribosomal protein S29 [Source:MGI Symbol;Acc:MGI:107681]                                                              | 509,840781  | -0,8793017 | -1,83948476  | 8,99298177 | 23,6125216 | 1,17818E-06 | 1,25799E-05  | protein_coding |
| ENSMUSG00000020340 | Cyfp2         | cytoplasmic FMR1 interacting protein 2 [Source:MGI Symbol;Acc:MGI:1924134]                                            | 179,855158  | -0,8802182 | -1,84065362  | 7,48922063 | 42,4257479 | 7,34171E-11 | 1,67005E-09  | protein_coding |
| ENSMUSG00000080848 | Gm9385        | predicted pseudogene 9385 [Source:MGI Symbol;Acc:MGI:3646182]                                                         | 11,02450549 | -0,8824176 | -1,84346192  | 3,44013034 | 11,9796235 | 0,000537855 | 0,002992105  | pseudogene     |
| ENSMUSG00000026764 | Kif5c         | kinesin family member 5C [Source:MGI Symbol;Acc:MGI:1098269]                                                          | 4,481693251 | -0,8834213 | -1,84474486  | 2,14195453 | 8,52329317 | 0,003506294 | 0,015094242  | protein_coding |
| ENSMUSG00000055184 | Fam72a        | family with sequence similarity 72, member A [Source:MGI Symbol;Acc:MGI:1919669]                                      | 9,56343076  | -0,8839242 | -1,84538802  | 3,25512171 | 14,292769  | 0,000156465 | 0,001012414  | protein_coding |
| ENSMUSG00000019194 | Scn1b         | sodium channel, voltage-gated, type I, beta [Source:MGI Symbol;Acc:MGI:98247]                                         | 85,00465085 | -0,8839248 | -1,84538875  | 6,40498021 | 38,4084564 | 5,73832E-10 | 1,12383E-08  | protein_coding |
| ENSMUSG00000052949 | Rnf157        | ring finger protein 157 [Source:MGI Symbol;Acc:MGI:2442484]                                                           | 44,67881962 | -0,8843998 | -1,84599649  | 5,47613199 | 33,2690766 | 8,02486E-09 | 1,28902E-07  | protein_coding |
| ENSMUSG00000052160 | Pld4          | phospholipase D family, member 4 [Source:MGI Symbol;Acc:MGI:2144765]                                                  | 457,9130982 | -0,8865959 | -1,84880862  | 8,83839889 | 22,1305156 | 2,54728E-06 | 5,24427E-05  | protein_coding |
| ENSMUSG00000020573 | Pik3cg        | phosphoinositide-3-kinase, catalytic, gamma polypeptide [Source:MGI Symbol;Acc:MGI:1353576]                           | 313,7575212 | -0,8866351 | -1,84885891  | 8,29320801 | 30,4375367 | 3,44791E-08 | 5,0274E-07   | protein_coding |
| ENSMUSG00000032643 | Fhl3          | four and a half LIM domains 3 [Source:MGI Symbol;Acc:MGI:1341092]                                                     | 165,5720875 | -0,8871167 | -1,84947618  | 7,36907922 | 37,0432346 | 1,15539E-09 | 2,14793E-08  | protein_coding |
| ENSMUSG00000037235 | Mxd4          | Max dimerization protein 4 [Source:MGI Symbol;Acc:MGI:104991]                                                         | 46,98172537 | -0,8881383 | -1,85078633  | 5,5432609  | 34,8175345 | 3,62098E-09 | 6,19208E-08  | protein_coding |
| ENSMUSG00000033220 | Rac2          | RAS-related C3 botulinum substrate 2 [Source:MGI Symbol;Acc:MGI:97846]                                                | 1968,482575 | -0,8887274 | -1,85154216  | 10,9428043 | 14,405139  | 0,0001474   | 0,000959407  | protein_coding |
| ENSMUSG00000043832 | Clec4a3       | C-type lectin domain family 4, member a3 [Source:MGI Symbol;Acc:MGI:1920399]                                          | 146,3374594 | -0,8892781 | -1,85224904  | 7,19187489 | 29,1710862 | 6,62607E-08 | 9,06608E-07  | protein_coding |
| ENSMUSG00000024241 | Sos1          | protein of sevenless homolog 1 (Drosophila) [Source:MGI Symbol;Acc:MGI:98355]                                         | 145,1684144 | -0,8909307 | -1,85437202  | 7,18120348 | 27,9936277 | 1,21176E-07 | 1,57328E-06  | protein_coding |
| ENSMUSG00000056130 | Ticam2        | toll-like receptor adaptor molecule 2 [Source:MGI Symbol;Acc:MGI:3040056]                                             | 70,48056436 | -0,8913437 | -1,85490291  | 6,13423558 | 33,5855148 | 6,81987E-09 | 1,10679E-07  | protein_coding |
| ENSMUSG00000027993 | Trim2         | tripartite motif-containing 2 [Source:MGI Symbol;Acc:MGI:1933163]                                                     | 41,96599685 | -0,8917995 | -1,85548907  | 5,37508423 | 38,1079856 | 6,69356E-10 | 1,29704E-08  | protein_coding |
| ENSMUSG00000020571 | Pdia6         | protein disulfide isomerase associated 6 [Source:MGI Symbol;Acc:MGI:1919103]                                          | 277,9218673 | -0,8936756 | -1,85790355  | 8,1181833  | 29,2829635 | 6,25432E-08 | 8,80027E-07  | protein_coding |
| ENSMUSG00000041939 | Mvk           | mevalonate kinase [Source:MGI Symbol;Acc:MGI:1076224]                                                                 | 14,72405127 | -0,8937334 | -1,85797802  | 3,86729899 | 10,3202002 | 0,00131582  | 0,006502836  | protein_coding |
| ENSMUSG00000090035 | Gaint1        | UDP-N-acetyl-alpha-D-galactosamine:polypeptide N-acetylgalactosaminyltransferase 4 [Source:MGI Symbol;Acc:MGI:867408] | 26,07980075 | -0,89451   | -1,8589784   | 6,69725595 | 25,1955144 | 5,18025E-07 | 5,91022E-06  | protein_coding |
| ENSMUSG00000025630 | Hprt          | hypoxanthine guanine phosphoribosyl transferase [Source:MGI Symbol;Acc:MGI:96217]                                     | 304,7180232 | -0,8947408 | -1,85927583  | 8,25106171 | 34,5974549 | 4,05436E-09 | 6,89555E-08  | protein_coding |
| ENSMUSG00000021273 | Fdft1         | farnesyl diphosphate farnesyl transferase 1 [Source:MGI Symbol;Acc:MGI:102706]                                        | 27,31861759 | -0,8952695 | -1,85995537  | 4,76361254 | 9,38909332 | 0,002182801 | 0,010106379  | protein_coding |
| ENSMUSG00000028826 | Tmem57        | transmembrane protein 57 [Source:MGI Symbol;Acc:MGI:1913396]                                                          | 63,95384686 | -0,8954236 | -1,86015579  | 5,99339314 | 36,4924831 | 1,53256E-09 | 2,80171E-08  | protein_coding |
| ENSMUSG00000036305 | Rpl39-ps      | ribosomal protein L39, pseudogene [Source:MGI Symbol;Acc:MGI:3705781]                                                 | 48,9878116  | -0,8960327 | -1,86094144  | 5,60934182 | 38,3350691 | 5,95822E-10 | 1,15864E-08  | pseudogene     |
| ENSMUSG00000021880 | Rnase6        | ribonuclease, RNase A family, 6 [Source:MGI Symbol;Acc:MGI:1925666]                                                   | 2,793395233 | -0,8960362 | -1,86094599  | 1,45625279 | 6,148133   | 0,01315509  | 0,045337195  | protein_coding |
| ENSMUSG00000038594 | Gm9766        | predicted gene 9766 [Source:MGI Symbol;Acc:MGI:3642684]                                                               | 11,4259212  | -0,8979701 | -1,86344218  | 3,50490106 | 14,5589792 | 0,00013584  | 0,00089156   | protein_coding |
| ENSMUSG00000041729 | Coro2b        | coronin, actin binding protein, 2B [Source:MGI Symbol;Acc:MGI:2444283]                                                | 8,195849962 | -0,8980888 | -1,86359556  | 3,02681018 | 10,7332486 | 0,001052276 | 0,005362408  | protein_coding |
| ENSMUSG00000004266 | Ptpn6         | protein tyrosine phosphatase, non-receptor type 6 [Source:MGI Symbol;Acc:MGI:96055]                                   | 671,9564991 | -0,8983077 | -1,86378737  | 9,39193967 | 22,0463389 | 2,66147E-06 | 2,64869E-05  | protein_coding |
| ENSMUSG00000061111 | Fam195b       | family with sequence similarity 195, member B [Source:MGI Symbol;Acc:MGI:2384752]                                     | 26,90963699 | -0,8993094 | -1,86517296  | 4,72980311 | 29,5345154 | 5,49297E-08 | 7,66853E-07  | protein_coding |
| ENSMUSG00000024235 | Map3k8        | mitogen-activated protein kinase kinase kinase 8 [Source:MGI Symbol;Acc:MGI:1346878]                                  | 62,12306449 | -0,9011831 | -1,86759694  | 5,95398149 | 28,4561516 | 9,58447E-08 | 1,26416E-06  | protein_coding |
| ENSMUSG00000049091 | Seps2s        | selenophosphate synthetase 2 [Source:MGI Symbol;Acc:MGI:108388]                                                       | 127,1836731 | -0,9011971 | -1,86761     |            |            |             |              |                |

|                     |               |                                                                                                                                    |        |             |            |             |            |            |             |             |                     |
|---------------------|---------------|------------------------------------------------------------------------------------------------------------------------------------|--------|-------------|------------|-------------|------------|------------|-------------|-------------|---------------------|
| ENSMUSG00000008496  | Pou2f2        | POU domain, class 2, transcription factor 2 [Source:MGI Symbol;Acc:MGI:101897]                                                     | Sheet1 | 133,529302  | -0,9099768 | -1,87901523 | 7,05820199 | 37,0923268 | 1,12666E-09 | 2,10521E-08 | protein_coding      |
| ENSMUSG00000032527  | Pccb          | propionyl Coenzyme A carboxylase, beta polypeptide [Source:MGI Symbol;Acc:MGI:1914154]                                             |        | 37,79653494 | -0,9108404 | -1,88014034 | 5,23032965 | 38,8153845 | 4,65842E-10 | 9,37151E-09 | protein_coding      |
| ENSMUSG000000085786 | Gm15987       | predicted gene 15987 [Source:MGI Symbol;Acc:MGI:3801849]                                                                           |        | 32,0858218  | -0,9125533 | -1,88237395 | 4,99879756 | 33,1942378 | 8,33973E-09 | 1,33569E-07 | antisense           |
| ENSMUSG00000002058  | Unc119        | unc-119 homolog (C. elegans) [Source:MGI Symbol;Acc:MGI:1328357]                                                                   |        | 80,14027911 | -0,9146501 | -1,88511182 | 6,31993528 | 42,0947272 | 6,75801E-11 | 9,63578E-09 | protein_coding      |
| ENSMUSG00000097551  |               |                                                                                                                                    |        | 3,459892316 | -0,9190596 | -1,8908823  | 1,76488702 | 6,95426791 | 6,003631951 | 0,031238611 | lincRNA             |
| ENSMUSG00000000876  | Pxmp4         | peroxisomal membrane protein 4 [Source:MGI Symbol;Acc:MGI:1891701]                                                                 |        | 15,22624755 | -0,9191586 | -1,89101217 | 3,91739879 | 20,3545483 | 6,434E-06   | 5,84701E-05 | protein_coding      |
| ENSMUSG00000022912  | Pros1         | protein S (alpha) [Source:MGI Symbol;Acc:MGI:1095733]                                                                              |        | 52,27197985 | -0,9193408 | -1,89125093 | 5,70416945 | 42,974161  | 5,54676E-11 | 1,29389E-09 | protein_coding      |
| ENSMUSG00000043300  | B3galnt1      | UDP-GalNAc:betaGlcNAc beta 1,3-galactosaminyltransferase, polypeptide 1 [Source:MGI Symbol;Acc:MGI:1349405]                        |        | 136,3905077 | -0,9217136 | -1,89439341 | 7,08994777 | 35,2874546 | 2,84459E-09 | 4,93736E-08 | protein_coding      |
| ENSMUSG00000026158  | Ogfr11        | opioid growth factor receptor-like 1 [Source:MGI Symbol;Acc:MGI:1917405]                                                           |        | 42,64498767 | -0,9217414 | -1,89440054 | 5,4157657  | 35,347652  | 2,75801E-09 | 4,80226E-08 | protein_coding      |
| ENSMUSG00000019189  | Rnf145        | ring finger protein 145 [Source:MGI Symbol;Acc:MGI:1921565]                                                                        |        | 103,1575364 | -0,9251567 | -1,89889044 | 6,68659093 | 29,4031018 | 5,87835E-08 | 8,16503E-07 | protein_coding      |
| ENSMUSG00000042349  | Ikbke         | inhibitor of kappaB kinase epsilon [Source:MGI Symbol;Acc:MGI:1929612]                                                             |        | 559,3339831 | -0,9255928 | -1,89946461 | 9,12727194 | 21,1258297 | 4,30092E-06 | 4,09127E-05 | protein_coding      |
| ENSMUSG00000026380  | Ak8           | adenylate kinase 8 [Source:MGI Symbol;Acc:MGI:1916120]                                                                             |        | 4,195587464 | -0,9275676 | -1,90206636 | 2,03601412 | 8,15619382 | 0,004291434 | 0,017832824 | protein_coding      |
| ENSMUSG00000042700  | Sipa11        | signal-induced proliferation-associated 1 like 1 [Source:MGI Symbol;Acc:MGI:2443679]                                               |        | 227,5624252 | -0,9281426 | -1,90282467 | 7,82945014 | 30,7021815 | 3,00827E-08 | 4,43649E-07 | protein_coding      |
| ENSMUSG00000037447  | Arid5a        | AT rich interactive domain 5A (MRF1-like) [Source:MGI Symbol;Acc:MGI:2443039]                                                      |        | 11,4630867  | -0,9286409 | -1,90348196 | 3,5138264  | 10,7135583 | 0,001063533 | 0,005407236 | protein_coding      |
| ENSMUSG00000084416  | Rpl10a-ps1    | ribosomal protein L10A, pseudogene 1 [Source:MGI Symbol;Acc:MGI:3705885]                                                           |        | 338,5004008 | -0,9292602 | -1,9042993  | 8,4020877  | 27,8046158 | 1,34206E-07 | 1,71655E-06 | pseudogene          |
| ENSMUSG00000050912  | Tmem123       | transmembrane protein 123 [Source:MGI Symbol;Acc:MGI:1919179]                                                                      |        | 24,3443291  | -0,9299788 | -1,90524801 | 7,92652641 | 26,9644324 | 2,07234E-07 | 5,25297E-06 | protein_coding      |
| ENSMUSG00000026000  | Lanc1         | LanC (bacterial antibiotic synthetase component C)-like 1 [Source:MGI Symbol;Acc:MGI:1336997]                                      |        | 42,91871011 | -0,9301309 | -1,90544886 | 5,42425987 | 35,1526667 | 3,04859E-09 | 6,48026E-08 | protein_coding      |
| ENSMUSG00000014637  | 4931428F04Rik | RIKEN cDNA 4931428F04 gene [Source:MGI Symbol;Acc:MGI:1921606]                                                                     |        | 3,906173063 | -0,9302337 | -1,90558463 | 1,95599282 | 8,90895371 | 0,002837758 | 0,012597353 | protein_coding      |
| ENSMUSG00000032514  | Ttc21a        | tetratricopeptide repeat domain 21A [Source:MGI Symbol;Acc:MGI:1921302]                                                            |        | 8,835731256 | -0,9326537 | -1,90878384 | 3,12028219 | 13,4384438 | 0,00024652  | 0,001508047 | protein_coding      |
| ENSMUSG00000018459  | Slc13a3       | solute carrier family 13 (sodium-dependent dicarboxylate transporter), member 3 [Source:MGI Symbol;Acc:MGI:2149637]                |        | 11817,41824 | -0,9352428 | -1,91221236 | 13,5286226 | 9,91046623 | 0,001643415 | 0,007929819 | protein_coding      |
| ENSMUSG00000026770  | Il2ra         | interleukin 2 receptor, alpha chain [Source:MGI Symbol;Acc:MGI:96549]                                                              |        | 53,07962721 | -0,9353318 | -1,91233045 | 5,7389944  | 29,8861607 | 4,58171E-08 | 6,48702E-07 | protein_coding      |
| ENSMUSG00000050530  | Fam171a1      | family with sequence similarity 171, member A1 [Source:MGI Symbol;Acc:MGI:2442917]                                                 |        | 2,534961147 | -0,9377234 | -1,91550321 | 1,34594409 | 6,18359118 | 0,012894032 | 0,044605393 | protein_coding      |
| ENSMUSG00000028518  | Prkaa2        | protein kinase, AMP-activated, alpha 2 catalytic subunit [Source:MGI Symbol;Acc:MGI:1336173]                                       |        | 4,075906662 | -0,9387202 | -1,9168271  | 1,98279854 | 7,33901277 | 0,006747389 | 0,026103365 | protein_coding      |
| ENSMUSG00000038437  | Mllt6         | myeloid/lymphoid or mixed-lineage leukemia (trithorax homolog, Drosophila); translocated to, 7 [Source:MGI Symbol;Acc:MGI:2195253] |        | 217,4038941 | -0,9388919 | -1,91705528 | 7,94940074 | 28,7980317 | 8,03327E-08 | 1,07636E-06 | protein_coding      |
| ENSMUSG00000059089  | Fcgr4         | Fc receptor, IgG, low affinity IV [Source:MGI Symbol;Acc:MGI:2179523]                                                              |        | 249,2574606 | -0,9391786 | -1,91743619 | 7,75597614 | 19,2635696 | 1,13858E-05 | 9,74368E-05 | protein_coding      |
| ENSMUSG00000097723  |               |                                                                                                                                    |        | 2,823047758 | -0,9393791 | -1,91770272 | 1,46934798 | 6,93089405 | 0,008471933 | 0,031606494 | lincRNA             |
| ENSMUSG00000021238  | Aldh6a1       | aldehyde dehydrogenase family 6, subfamily A1 [Source:MGI Symbol;Acc:MGI:1915077]                                                  |        | 53,76356696 | -0,9402106 | -1,91880827 | 5,74455476 | 39,313376  | 3,6096E-10  | 7,39901E-09 | protein_coding      |
| ENSMUSG00000079488  | Cd47          | CD47 antigen (Rh-related antigen, integrin-associated signal transducer) [Source:MGI Symbol;Acc:MGI:96617]                         |        | 7,8884989   | -0,940213  | -1,91881151 | 2,96922583 | 9,7399058  | 0,001803101 | 0,008616404 | accessed_pseudogene |
| ENSMUSG00000030403  | Vasp          | vasodilator-stimulated phosphoprotein [Source:MGI Symbol;Acc:MGI:109268]                                                           |        | 523,2084158 | -0,9402673 | -1,91888372 | 9,03084548 | 23,2606994 | 1,41461E-06 | 1,48447E-05 | protein_coding      |
| ENSMUSG00000028465  | Tln1          | talin 1 [Source:MGI Symbol;Acc:MGI:1099832]                                                                                        |        | 1697,376432 | -0,9406664 | -1,91941468 | 10,728986  | 17,6759274 | 2,6192E-05  | 0,000205993 | protein_coding      |
| ENSMUSG00000052760  | A630001G21Rik | RIKEN cDNA A630001G21 gene [Source:MGI Symbol;Acc:MGI:2443131]                                                                     |        | 119,9885939 | -0,9407296 | -1,91949875 | 6,90363702 | 35,7016277 | 2,29972E-09 | 4,10179E-08 | protein_coding      |
| ENSMUSG00000031880  | Rrad          | Ras-related associated with diabetes [Source:MGI Symbol;Acc:MGI:1930943]                                                           |        | 11,06868384 | -0,9414482 | -1,92045504 | 3,45973341 | 21,1524782 | 4,24152E-06 | 4,03827E-05 | protein_coding      |
| ENSMUSG00000009971  | Kcnd1         | potassium voltage-gated channel, Shal-related family, member 1 [Source:MGI Symbol;Acc:MGI:96671]                                   |        | 13,81316213 | -0,9419317 | -1,92109878 | 3,7712126  | 14,7560811 | 0,000122352 | 0,000815212 | protein_coding      |
| ENSMUSG00000024238  | Zeb1          | zinc finger E-box binding homeobox 1 [Source:MGI Symbol;Acc:MGI:1344313]                                                           |        | 9,878312499 | -0,9422154 | -1,92147664 | 3,2805103  | 17,9740657 | 2,23935E-05 | 0,000179984 | protein_coding      |
| ENSMUSG00000024983  | Vti1a         | vesicle transport through interaction with t-SNAREs homolog 1A (yeast) [Source:MGI Symbol;Acc:MGI:1855699]                         |        | 135,1346707 | -0,9424768 | -1,92182481 | 7,07710414 | 34,480828  | 4,30471E-09 | 7,27628E-08 | protein_coding      |
| ENSMUSG00000028159  | Dapp1         | dual adaptor for phosphotyrosine and 3-phosphoinositides 1 [Source:MGI Symbol;Acc:MGI:1347063]                                     |        | 30,41663849 | -0,9424778 | -1,92182604 | 4,91947975 | 38,7566846 | 4,80063E-10 | 9,62492E-09 | protein_coding      |
| ENSMUSG00000093809  | Bcl2a1a       | B cell leukemia/lymphoma 2 related protein A1a [Source:MGI Symbol;Acc:MGI:102687]                                                  |        | 55,8792289  | -0,9432324 | -1,92283154 | 5,80471204 | 28,2769658 | 1,0514E-07  | 1,3752E-06  | protein_coding      |
| ENSMUSG00000038990  | Cables2       | CDK5 and Abl enzyme substrate 2 [Source:MGI Symbol;Acc:MGI:2182335]                                                                |        | 41,23308934 | -0,9432635 | -1,92287303 | 5,35802488 | 31,3681441 | 2,13455E-08 | 3,21264E-07 | protein_coding      |
| ENSMUSG00000034751  | Mast4         | microtubule associated serine/threonine kinase family member 4 [Source:MGI Symbol;Acc:MGI:1918885]                                 |        | 11,69393727 | -0,9445221 | -1,9245513  | 3,52870075 | 21,1690752 | 4,20495E-06 | 4,0104E-05  | protein_coding      |
| ENSMUSG00000079020  | Slc45a4       | solute carrier family 45, member 4 [Source:MGI Symbol;Acc:MGI:2146236]                                                             |        | 108,499364  | -0,9457902 | -1,92624369 | 6,75686074 | 41,2262877 | 1,35587E-10 | 2,96751E-09 | protein_coding      |
| ENSMUSG000000064367 | mt-Nd5        | mitochondrially encoded NADH dehydrogenase 5 [Source:MGI Symbol;Acc:MGI:102496]                                                    |        | 828,5598867 | -0,9473799 | -1,92836732 | 9,69455661 | 26,238457  | 3,01753E-07 | 3,6115E-06  | protein_coding      |
| ENSMUSG00000032035  | Ets1          | E26 avian leukemia oncogene 1, 5' domain [Source:MGI Symbol;Acc:MGI:95455]                                                         |        | 29,61977199 | -0,9488945 | -1,93039285 | 4,88946548 | 32,6282894 | 1,11579E-09 | 1,76137E-07 | protein_coding      |
| ENSMUSG00000026430  | Rassf5        | Ras association (RalGDS/AF-6) domain family member 5 [Source:MGI Symbol;Acc:MGI:1926375]                                           |        | 48,73419398 | -0,9510692 | -1,93330495 | 5,5969459  | 44,2186132 | 2,93676E-11 | 7,09146E-10 | protein_coding      |
| ENSMUSG00000041112  | Elmo1         | engulfment and cell motility 1 [Source:MGI Symbol;Acc:MGI:2153044]                                                                 |        | 390,7234713 | -0,9516577 | -1,93409373 | 8,60951879 | 30,1225808 | 4,05581E-08 | 5,78717E-07 | protein_coding      |
| ENSMUSG00000037270  | 4932438A13Rik | RIKEN cDNA 4932438A13 gene [Source:MGI Symbol;Acc:MGI:2444631]                                                                     |        | 269,3646586 | -0,9517821 | -1,93426054 | 8,07266889 | 42,7542279 | 6,20676E-11 | 1,43566E-09 | protein_coding      |
| ENSMUSG00000021069  | Pghl1         | liver glycogen phosphorylase [Source:MGI Symbol;Acc:MGI:97829]                                                                     |        | 177,5586558 | -0,9531813 | -1,9361374  | 7,47093588 | 42,5363507 | 6,93807E-11 | 1,5881E-09  | protein_coding      |
| ENSMUSG00000028538  | Sl3gal3       | ST3 beta-galactoside alpha-2,3-sialyltransferase 3 [Source:MGI Symbol;Acc:MGI:1316659]                                             |        | 17,82962254 | -0,9541597 | -1,93745082 | 4,14520809 | 32,2807733 | 1,33427E-08 | 2,08233E-07 | protein_coding      |
| ENSMUSG00000026672  | Optrn         | optineurin [Source:MGI Symbol;Acc:MGI:1918898]                                                                                     |        | 62,73597762 | -0,954841  | -1,93836601 | 5,96665703 | 30,6909598 | 3,02571E-08 | 4,45624E-07 | protein_coding      |
| ENSMUSG00000001741  | Il16          | interleukin 16 [Source:MGI Symbol;Acc:MGI:1270855]                                                                                 |        | 55,91139773 | -0,9554956 | -1,93924569 | 5,80020148 | 16,6226615 | 4,56029E-05 | 0,000338083 | protein_coding      |
| ENSMUSG00000032946  | Rasgrp2       | RAS, guanyl releasing protein 2 [Source:MGI Symbol;Acc:MGI:1333849]                                                                |        | 17,00967148 | -0,955525  | -1,93928516 | 4,07164955 | 26,0778938 | 3,27917E-07 | 3,88235E-06 | protein_coding      |
| ENSMUSG00000035824  | Tk2           | thymidine kinase 2, mitochondrial [Source:MGI Symbol;Acc:MGI:1913266]                                                              |        | 46,17283936 | -0,956512  | -1,94061124 | 5,51997271 | 35,0607292 | 3,19581E-09 | 5,50351E-08 | protein_coding      |
| ENSMUSG00000029449  | Rhof          | ras homolog gene family, member f [Source:MGI Symbol;Acc:MGI:1345629]                                                              |        | 16,3027118  | -0,9572008 | -1,9415391  | 4,01792112 | 23,3404721 | 1,35714E-06 | 1,43099E-05 | protein_coding      |
| ENSMUSG00000001348  | Acp5          | acid phosphatase 5, tartrate resistant [Source:MGI Symbol;Acc:MGI:87883]                                                           |        | 90,63496597 | -0,9574309 | -1,94184886 | 6,49888971 | 31,7140948 | 1,78621E-08 | 2,7295E-07  | protein_coding      |
| ENSMUSG00000036504  | Phtp1         | phosphohistidine phosphatase 1 [Source:MGI Symbol;Acc:MGI:1922704]                                                                 |        | 9,344146186 | -0,957797  | -1,9423417  | 3,20512528 | 17,9579132 | 2,25844E-05 | 0,000811385 | protein_coding      |
| ENSMUSG00000049313  | Sor11         | soritin-related receptor, LDLR class A repeats-containing [Source:MGI Symbol;Acc:MGI:1202296]                                      |        | 29,40186785 | -0,95868   | -1,94353083 | 4,88487546 | 41,8581974 | 9,81385E-11 | 2,17828E-09 | protein_coding      |
| ENSMUSG00000032609  | Klhdcb8b      | kelch domain containing 8B [Source:MGI Symbol;Acc:MGI:1925517]                                                                     |        | 3,325299452 | -0,9589014 | -1,94382917 | 1,69556565 | 7,91680807 | 0,004897761 | 0,019837671 | protein_coding      |
| ENSMUSG000000063314 | K12657        | predicted gene 12657 [Source:MGI Symbol;Acc:MGI:3651714]                                                                           |        | 4,136516958 | -0,9594725 | -1,9445987  | 2,06355171 | 9,44651716 | 0,002115504 | 0,009840409 | pseudogene          |
| ENSMUSG00000036469  | 41334         | membrane-associated ring finger (C3HC4) 1 [Source:MGI Symbol;Acc:MGI:1920175]                                                      |        | 114,8091942 | -0,9600425 | -1,94536725 | 6,84175315 | 31,6045966 | 1,88982E-08 | 2,87184E-07 | protein_coding      |
| ENSMUSG00000037410  | Tbc1d2b       | TBC1 domain family, member 2B [Source:MGI Symbol;Acc:MGI:1914266]                                                                  |        | 331,7312195 | -0,9610011 | -1,94666019 | 8,37332422 | 34,9816244 | 3,32832E-09 | 5,70487E-08 | protein_coding      |
| ENSMUSG00000074743  | Tbhd          | thrombomodulin [Source:MGI Symbol;Acc:MGI:98736]                                                                                   |        | 56,51908569 | -0,9616041 | -1,94747406 | 5,82668274 | 38,9444141 | 4,36046E-10 | 8,81793E-09 | protein_coding      |
| ENSMUSG00000031320  | Rps4x         | ribosomal protein S4, X-linked [Source:MGI Symbol;Acc:MGI:98158]                                                                   |        | 1033,46907  | -0,963579  | -1,9501418  | 10,0130757 | 22,5031758 | 2,09796E-05 | 2,12446E-05 | protein_coding      |
| ENSMUSG00000041688  | Amot          | angiomotin [Source:MGI Symbol;Acc:MGI:108440]                                                                                      |        | 4,592142499 | -0,9639404 | -1,9506304  | 2,20320546 | 10,3362943 | 0,001304396 | 0,006449776 | protein_coding      |
| ENSMUSG00000008318  | Relt          | RELT tumor necrosis factor receptor [Source:MGI Symbol;Acc:MGI:2443373]                                                            |        | 11,67120732 | -0,9643621 | -1,95120062 | 3,52959593 | 12,7758306 | 0,000351127 | 0,002055316 | protein_coding      |
| ENSMUSG00000034255  | Arhgap27      | Rho GTPase activating protein 27 [Source:MGI Symbol;Acc:MGI:1916903]                                                               |        | 232,1415735 | -0,9644042 | -1,95125749 | 7,85731035 | 33,7633701 | 6,22398E-09 | 1,0176E-07  | protein_coding      |
| ENSMUSG00000053291  | Rab4b         | RAB4B, member RAS oncogene family [Source:MGI Symbol;Acc:MGI:105071]                                                               |        | 103,9534362 | -0,9646301 | -1,95427046 | 6,69468893 | 41,2115497 | 1,36613E-10 | 2,98403E-09 | protein_coding      |
| ENSMUSG00000028525  | Pde4b         | phosphodiesterase 4B, cAMP specific [Source:MGI Symbol;Acc:MGI:99557]                                                              |        | 88,14311179 | -0,9673791 | -1,95528531 | 6,46192897 | 25,232451  | 5,08199E-07 | 5,80414E-06 | protein_coding      |
| ENSMUSG00000018654  | Iktzf1        | IKAROS family zinc finger 1 [Source:MGI Symbol;Acc:MGI:1342540]                                                                    |        | 201,8358568 | -0,9673821 | -1,95528928 | 7,65617019 | 35,021173  | 3,2614E-09  | 5,60766E-08 | protein_coding      |
| ENSMUSG00000042992  | Loh12cr1      | loss of heterozygosity                                                                                                             |        |             |            |             |            |            |             |             |                     |

|                    |               |                                                                                                                                     |        |             |             |                    |            |            |             |             |                |
|--------------------|---------------|-------------------------------------------------------------------------------------------------------------------------------------|--------|-------------|-------------|--------------------|------------|------------|-------------|-------------|----------------|
| ENSMUSG00000090523 | Gypc          | glycophorin C [Source:MGI Symbol;Acc:MGI:1098566]                                                                                   | Sheet1 | 28,99845127 | -0,97771174 | <b>-1,96852825</b> | 4,84852377 | 33,8020796 | 6,10136E-09 | 1,00203E-07 | protein_coding |
| ENSMUSG00000020787 | P2rx1         | purinergic receptor P2X, ligand-gated ion channel, 1 [Source:MGI Symbol;Acc:MGI:1098235]                                            |        | 3,174027542 | -0,9772752  | <b>-1,96874356</b> | 1,63936703 | 7,46100725 | 0,006304972 | 0,024652215 | protein_coding |
| ENSMUSG00000053329 | D10Jhu81e     | DNA segment, Chr 10, Johns Hopkins University 81 expressed [Source:MGI Symbol;Acc:MGI:1351861]                                      |        | 35,88586385 | -0,9789116  | <b>-1,97097784</b> | 5,15500973 | 34,4095315 | 4,46531E-09 | 7,53611E-08 | protein_coding |
| ENSMUSG00000053137 | Mapk11        | mitogen-activated protein kinase 11 [Source:MGI Symbol;Acc:MGI:1338024]                                                             |        | 6,654767446 | -0,9792311  | <b>-1,97141448</b> | 2,72994137 | 13,8664996 | 0,000196266 | 0,000123623 | protein_coding |
| ENSMUSG00000029178 | Klf3          | Kruppel-like factor 3 (basic) [Source:MGI Symbol;Acc:MGI:1342773]                                                                   |        | 79,21394245 | -0,9793655  | <b>-1,97159805</b> | 6,30349843 | 34,3693252 | 4,55851E-09 | 7,66989E-08 | protein_coding |
| ENSMUSG00000028381 | Ugpc          | UDP-glucose ceramide glucosyltransferase [Source:MGI Symbol;Acc:MGI:1332243]                                                        |        | 76,4816423  | -0,9800309  | <b>-1,97250765</b> | 6,25377546 | 33,637349  | 6,64054E-09 | 1,08249E-07 | protein_coding |
| ENSMUSG0000000244  | Tspan32       | tetraspanin 32 [Source:MGI Symbol;Acc:MGI:1350360]                                                                                  |        | 23,94217135 | -0,9824639  | <b>-1,97583692</b> | 4,57141477 | 31,8981876 | 1,62469E-08 | 2,48613E-07 | protein_coding |
| ENSMUSG00000025876 | Unc5a         | unc-5 homolog A (C. elegans) [Source:MGI Symbol;Acc:MGI:894682]                                                                     |        | 2,338338647 | -0,983827   | <b>-1,97770471</b> | 1,22977469 | 6,23880216 | 0,012489098 | 0,043468376 | protein_coding |
| ENSMUSG00000027763 | Mbn1          | muscleblind-like 1 (Drosophila) [Source:MGI Symbol;Acc:MGI:1928482]                                                                 |        | 676,7000579 | -0,9848846  | <b>-1,979155</b>   | 9,40202025 | 28,2945725 | 1,04188E-07 | 1,36566E-06 | protein_coding |
| ENSMUSG00000038648 | Creb3l2       | cAMP responsive element binding protein 3-like 2 [Source:MGI Symbol;Acc:MGI:2442695]                                                |        | 16,46767814 | -0,985986   | <b>-1,98066648</b> | 4,03330605 | 22,0086843 | 2,7142E-06  | 2,69385E-05 | protein_coding |
| ENSMUSG00000089722 | Gm1171        | predicted gene 11711 [Source:MGI Symbol;Acc:MGI:3702661]                                                                            |        | 93,57778681 | -0,9872332  | <b>-1,98237957</b> | 6,55010376 | 34,5016391 | 4,25893E-09 | 7,20999E-08 | protein_coding |
| ENSMUSG00000040592 | Cd79b         | CD79B antigen [Source:MGI Symbol;Acc:MGI:96431]                                                                                     |        | 30,30819589 | -0,9900176  | <b>-1,98620925</b> | 4,91857244 | 36,1603164 | 1,81734E-09 | 3,2949E-08  | protein_coding |
| ENSMUSG00000040699 | Limd2         | LIM domain containing 2 [Source:MGI Symbol;Acc:MGI:1915053]                                                                         |        | 376,923227  | -0,9902443  | <b>-1,98652136</b> | 8,55744874 | 31,6081244 | 1,86639E-08 | 2,8706E-07  | protein_coding |
| ENSMUSG00000022540 | Rogdi         | rogdi homolog (Drosophila) [Source:MGI Symbol;Acc:MGI:1913299]                                                                      |        | 20,71757649 | -0,9908509  | <b>-1,98735683</b> | 4,3630904  | 29,9978186 | 4,32533E-08 | 6,13984E-07 | protein_coding |
| ENSMUSG00000032883 | Acsf3         | acyl-CoA synthetase long-chain family member 3 [Source:MGI Symbol;Acc:MGI:1921455]                                                  |        | 36,53792819 | -0,9911239  | <b>-1,98773282</b> | 5,18280307 | 22,7541633 | 1,84105E-06 | 1,89575E-05 | protein_coding |
| ENSMUSG00000060090 | Rp2h          | retinitis pigmentosa 2 homolog (human) [Source:MGI Symbol;Acc:MGI:1277953]                                                          |        | 122,3634578 | -0,9915543  | <b>-1,98832593</b> | 6,93160028 | 44,8869567 | 2,08744E-11 | 5,1308E-10  | protein_coding |
| ENSMUSG00000044026 | Tmem20        | transmembrane protein 20 [Source:MGI Symbol;Acc:MGI:2444789]                                                                        |        | 174,1233048 | -0,9931037  | <b>-1,9904625</b>  | 7,44456114 | 40,2213216 | 2,2676E-10  | 4,81897E-09 | protein_coding |
| ENSMUSG00000024948 | Map4k2        | mitogen-activated protein kinase kinase kinase kinase 2 [Source:MGI Symbol;Acc:MGI:1346883]                                         |        | 100,635299  | -0,9932511  | <b>-1,99066585</b> | 6,64815313 | 44,0633912 | 3,17911E-11 | 7,60979E-10 | protein_coding |
| ENSMUSG00000034066 | Farp2         | FERM, RhoGEF and pleckstrin domain protein 2 [Source:MGI Symbol;Acc:MGI:2385126]                                                    |        | 16,93106465 | -0,994372   | <b>-1,99221315</b> | 4,07309242 | 18,7988994 | 1,45251E-05 | 0,000121915 | protein_coding |
| ENSMUSG00000028464 | Tpm2          | tropomyosin 2, beta [Source:MGI Symbol;Acc:MGI:98810]                                                                               |        | 6,961681637 | -0,9983237  | <b>-1,99767746</b> | 2,8413736  | 14,1188013 | 0,00017162  | 0,001094363 | protein_coding |
| ENSMUSG00000031367 | Apl1s2        | adaptor-related protein complex 1, sigma 2 subunit [Source:MGI Symbol;Acc:MGI:1889383]                                              |        | 299,6188544 | -0,998476   | <b>-1,99788842</b> | 8,22597397 | 42,4143191 | 7,38474E-11 | 1,67637E-09 | protein_coding |
| ENSMUSG00000059994 | Fcrl          | Fc receptor-like 1 [Source:MGI Symbol;Acc:MGI:2442862]                                                                              |        | 24,59919118 | -0,9985323  | <b>-1,99796637</b> | 4,62598462 | 30,7488096 | 2,93684E-08 | 4,36397E-07 | protein_coding |
| ENSMUSG00000026489 | Adck3         | aarF domain containing kinase 3 [Source:MGI Symbol;Acc:MGI:1914676]                                                                 |        | 14,69876844 | -0,9991549  | <b>-1,99882875</b> | 3,86220349 | 25,8228233 | 3,74237E-07 | 4,36954E-06 | protein_coding |
| ENSMUSG00000053080 | 2700081O15Rik | RIKEN cDNA 2700081O15 gene [Source:MGI Symbol;Acc:MGI:1919667]                                                                      |        | 6,553173247 | -0,9993143  | <b>-1,9990496</b>  | 2,67535809 | 12,8813346 | 0,000331875 | 0,001956178 | protein_coding |
| ENSMUSG00000040139 | 94300381O1Rik | RIKEN cDNA 94300381O1 gene [Source:MGI Symbol;Acc:MGI:1924502]                                                                      |        | 10,88960125 | -0,1006552  | <b>-2,00090849</b> | 3,42686048 | 20,9761059 | 4,65047E-06 | 4,38958E-05 | protein_coding |
| ENSMUSG00000013033 | Lphn1         | latrophilin 1 [Source:MGI Symbol;Acc:MGI:1929461]                                                                                   |        | 5,126158947 | -1,0010659  | <b>-2,00147821</b> | 2,33891464 | 11,2822396 | 0,000782521 | 0,004155417 | protein_coding |
| ENSMUSG00000095957 |               | MCG116065; Uncharacterized protein [Source:UniProtKB/TrEMBL;Acc:J3QJZ3]                                                             |        | 93,10507025 | -1,0019494  | <b>-2,00270426</b> | 6,54321556 | 38,0819269 | 6,78356E-10 | 1,31216E-08 | protein_coding |
| ENSMUSG00000030774 | Pak1          | p21 protein (Cdc42/Rac)-activated kinase 1 [Source:MGI Symbol;Acc:MGI:1339975]                                                      |        | 121,4975106 | -1,0020381  | <b>-2,00282746</b> | 6,92199154 | 44,0683819 | 3,17102E-11 | 7,60698E-10 | protein_coding |
| ENSMUSG00000000248 | Clec2g        | C-type lectin domain family 2, member g [Source:MGI Symbol;Acc:MGI:1918059]                                                         |        | 2,366930372 | -1,0036232  | <b>-2,0050291</b>  | 1,20662931 | 6,55646941 | 0,010450351 | 0,037694682 | protein_coding |
| ENSMUSG00000097771 |               | Coronin [Source:UniProtKB/TrEMBL;Acc:A2RS22]                                                                                        |        | 359,0191888 | -1,0042118  | <b>-2,00584731</b> | 8,48728246 | 35,44727   | 2,62049E-09 | 4,59192E-08 | protein_coding |
| ENSMUSG00000024835 | Coro1b        | coronin, actin binding protein 1B [Source:MGI Symbol;Acc:MGI:1345963]                                                               |        | 359,0191888 | -1,0042155  | <b>-2,00585245</b> | 8,48728416 | 35,352066  | 2,75177E-09 | 4,79899E-08 | protein_coding |
| ENSMUSG00000058558 | Rpl5          | ribosomal protein L5 [Source:MGI Symbol;Acc:MGI:102854]                                                                             |        | 32,50332217 | -1,0045371  | <b>-2,00629964</b> | 5,01787183 | 28,3389373 | 1,01827E-07 | 1,33825E-06 | protein_coding |
| ENSMUSG00000000127 | Fer           | fer (fms/fps related) protein kinase [Source:MGI Symbol;Acc:MGI:105917]                                                             |        | 64,2947048  | -1,0058307  | <b>-2,00809938</b> | 6,00070168 | 49,0462445 | 2,49998E-12 | 7,0975E-11  | protein_coding |
| ENSMUSG00000044667 | D3Bwg0562e    | DNA segment, Chr 3, Brigham & Women's Genetics 0562 expressed [Source:MGI Symbol;Acc:MGI:106530]                                    |        | 3,509071076 | -1,0091557  | <b>-2,01273291</b> | 1,84647373 | 7,55631212 | 0,005980024 | 0,023591571 | protein_coding |
| ENSMUSG00000039735 | Fbnp1         | frnA binding protein 1-like [Source:MGI Symbol;Acc:MGI:1925642]                                                                     |        | 526,5791793 | -1,0106445  | <b>-2,01481091</b> | 9,04017448 | 28,6078701 | 8,86213E-08 | 1,17453E-06 | protein_coding |
| ENSMUSG00000067577 | A430093F15Rik | RIKEN cDNA A430093F15 gene [Source:MGI Symbol;Acc:MGI:2685520]                                                                      |        | 4,641010353 | -1,0124639  | <b>-2,01735346</b> | 2,19679419 | 10,3745113 | 0,00127767  | 0,006337588 | protein_coding |
| ENSMUSG00000042228 | Lyn           | Yamaguchi sarcoma viral (v-yes-1) oncogene homolog [Source:MGI Symbol;Acc:MGI:96892]                                                |        | 575,6829359 | -1,012547   | <b>-2,01746965</b> | 9,16907745 | 28,6843293 | 8,51903E-07 | 1,13178E-06 | protein_coding |
| ENSMUSG00000064043 | Bcl2a1b       | B cell leukemia/lymphoma 2 related protein A1b [Source:MGI Symbol;Acc:MGI:1278326]                                                  |        | 220,9638244 | -1,0129457  | <b>-2,01802726</b> | 7,78742328 | 26,8015241 | 2,25459E-07 | 2,73715E-06 | protein_coding |
| ENSMUSG00000004113 | Cacna1b       | calcium channel, voltage-dependent, N type, alpha 1B subunit [Source:MGI Symbol;Acc:MGI:88296]                                      |        | 3,703842926 | -1,0137454  | <b>-2,01914629</b> | 1,86682915 | 7,40969753 | 0,006487323 | 0,025257341 | protein_coding |
| ENSMUSG00000025010 | Ccnj          | cyclin J [Source:MGI Symbol;Acc:MGI:2443297]                                                                                        |        | 15,52743256 | -1,0150259  | <b>-2,02093915</b> | 3,93703809 | 27,637347  | 1,46326E-07 | 1,84728E-06 | protein_coding |
| ENSMUSG00000073758 | Sh3d21        | SH3 domain containing 21 [Source:MGI Symbol;Acc:MGI:1914188]                                                                        |        | 6,82943889  | -1,0159214  | <b>-2,02219405</b> | 2,76833064 | 13,4024552 | 0,00251295  | 0,001533878 | protein_coding |
| ENSMUSG00000009248 | Ascl2         | achaete-scute complex homolog 2 (Drosophila) [Source:MGI Symbol;Acc:MGI:96920]                                                      |        | 10,63006858 | -1,0212099  | <b>-2,02962041</b> | 3,39688507 | 18,5413201 | 1,66261E-05 | 0,000138073 | protein_coding |
| ENSMUSG00000097227 |               |                                                                                                                                     |        | 3,500932215 | -1,0246125  | <b>-2,03441284</b> | 1,75897852 | 9,55668362 | 0,001992227 | 0,009338139 | lincRNA        |
| ENSMUSG00000090862 | Rps13         | ribosomal protein S13 [Source:MGI Symbol;Acc:MGI:1915302]                                                                           |        | 84,21891032 | -1,0246946  | <b>-2,03452866</b> | 6,38964909 | 43,2013608 | 4,93863E-11 | 1,1619E-09  | protein_coding |
| ENSMUSG00000032258 | Lca5          | Leber congenital amaurosis 5 (human) [Source:MGI Symbol;Acc:MGI:1923032]                                                            |        | 18,57214188 | -1,0253253  | <b>-2,03541834</b> | 4,20351839 | 34,5924632 | 4,06477E-09 | 6,90257E-08 | protein_coding |
| ENSMUSG00000064043 | Trefr1        | transcriptional regulating factor 1 [Source:MGI Symbol;Acc:MGI:2442086]                                                             |        | 110,1104755 | -1,0261031  | <b>-2,03651597</b> | 6,77812417 | 42,9764394 | 5,54031E-11 | 1,29389E-09 | protein_coding |
| ENSMUSG00000021423 | Ly86          | lymphocyte antigen 86 [Source:MGI Symbol;Acc:MGI:1321404]                                                                           |        | 84,92052321 | -1,0275989  | <b>-2,03862849</b> | 6,40536335 | 38,3695351 | 5,85391E-10 | 1,14037E-08 | protein_coding |
| ENSMUSG00000054263 | Lifr          | leukemia inhibitory factor receptor [Source:MGI Symbol;Acc:MGI:96788]                                                               |        | 10,7162955  | -1,0282233  | <b>-2,03951099</b> | 3,40415026 | 16,4046457 | 5,11597E-05 | 0,000376233 | protein_coding |
| ENSMUSG00000038127 | Cdc50         | coiled-coil domain containing 50 [Source:MGI Symbol;Acc:MGI:1914751]                                                                |        | 760,0365573 | -1,0348875  | <b>-2,04895388</b> | 9,56975516 | 27,1112099 | 1,92081E-07 | 2,36326E-06 | protein_coding |
| ENSMUSG00000001424 | Snd1          | staphylococcal nuclease and tudor domain containing 1 [Source:MGI Symbol;Acc:MGI:1929266]                                           |        | 275,3434469 | -1,0352316  | <b>-2,04944257</b> | 8,10398291 | 37,4014517 | 9,61505E-10 | 1,81825E-08 | protein_coding |
| ENSMUSG00000029552 | Nuf2          | testis derived transcript [Source:MGI Symbol;Acc:MGI:105081]                                                                        |        | 219,1096676 | -1,0363661  | <b>-2,05105487</b> | 7,77424404 | 34,330817  | 4,6442E-09  | 7,7902E-08  | protein_coding |
| ENSMUSG00000008450 | Nes           | nuclear transport factor 2 [Source:MGI Symbol;Acc:MGI:1915301]                                                                      |        | 13,17413601 | -1,0375747  | <b>-2,05277738</b> | 3,71428941 | 22,6933407 | 1,90025E-06 | 1,9494E-05  | protein_coding |
| ENSMUSG00000020492 | Ska2          | spindle and kinetochore associated complex subunit 2 [Source:MGI Symbol;Acc:MGI:1913390]                                            |        | 5,492007889 | -1,0389018  | <b>-2,05466306</b> | 2,4349411  | 12,4640168 | 0,000414867 | 0,002377747 | protein_coding |
| ENSMUSG00000041351 | Rap1gap       | Rap1 GTPase-activating protein [Source:MGI Symbol;Acc:MGI:109338]                                                                   |        | 7,395063742 | -1,0404831  | <b>-2,05691629</b> | 2,88966435 | 14,4380622 | 0,000144845 | 0,000945581 | protein_coding |
| ENSMUSG00000024854 | Pold4         | polymerase (DNA-directed), delta 4 [Source:MGI Symbol;Acc:MGI:1916995]                                                              |        | 22,06125616 | -1,0491103  | <b>-2,06925334</b> | 4,44383941 | 26,1214617 | 3,20601E-07 | 3,82043E-06 | protein_coding |
| ENSMUSG00000097508 |               | Polymerase (DNA-directed), delta 4, isoform CRA_b; Small subunit DNA polymerase delta p12 [Source:UniProtKB/TrEMBL;Acc:MGI:1918215] |        | 22,06125616 | -1,0491133  | <b>-2,06925769</b> | 4,44384324 | 26,1164833 | 3,21428E-07 | 3,82615E-06 | protein_coding |
| ENSMUSG00000030465 | Psd3          | pleckstrin and Sec7 domain containing 3 [Source:MGI Symbol;Acc:MGI:1918215]                                                         |        | 57,09438052 | -1,0503851  | <b>-2,07108263</b> | 5,82975548 | 48,1652113 | 3,91778E-12 | 1,06117E-10 | protein_coding |
| ENSMUSG00000063873 | Slc24a3       | solute carrier family 24 (sodium/potassium/calcium exchanger), member 3 [Source:MGI Symbol;Acc:MGI:2137513]                         |        | 10,09164564 | -1,0505088  | <b>-2,07126017</b> | 3,31434477 | 23,5890876 | 1,19262E-06 | 1,26847E-05 | protein_coding |
| ENSMUSG00000006435 | Neurl1a       | protein-L-isoaspartate (D-aspartate) O-methyltransferase domain containing 1 [Source:MGI Symbol;Acc:MGI:2441773]                    |        | 158,8717729 | -1,0508275  | <b>-2,07171778</b> | 7,30868171 | 58,3921562 | 2,14745E-14 | 8,10793E-13 | protein_coding |
| ENSMUSG00000006435 | Neurl1a       | neurallized homolog 1A (Drosophila) [Source:MGI Symbol;Acc:MGI:1334263]                                                             |        | 9,783341537 | -1,0542302  | <b>-2,0766098</b>  | 3,26913312 | 17,3298128 | 3,14218E-05 | 0,000242608 | protein_coding |
| ENSMUSG00000031381 | Piga          | phosphatidylinositol glycan anchor biosynthesis, class A [Source:MGI Symbol;Acc:MGI:99461]                                          |        | 23,42882041 | -1,0554828  | <b>-2,07841361</b> | 4,54613226 | 28,3093484 | 1,03395E-07 | 1,35724E-06 | protein_coding |
| ENSMUSG00000022769 | Sdf2l1        | sromal cell-derived factor 2-like 1 [Source:MGI Symbol;Acc:MGI:2149842]                                                             |        | 76,16775652 | -1,0585988  | <b>-2,08290754</b> | 6,24575199 | 42,9325383 | 5,66604E-11 | 1,31613E-09 | protein_coding |
| ENSMUSG00000067586 | S1pr3         | sphingosine-1-phosphate receptor 3 [Source:MGI Symbol;Acc:MGI:1339365]                                                              |        | 5,50156711  | -1,059648   | <b>-2,08442285</b> | 2,48710393 | 13,9353374 | 0,000189208 | 0,001195414 | protein_coding |
| ENSMUSG00000019853 | Hebp2         | heme binding protein 2 [Source:MGI Symbol;Acc:MGI:1860084]                                                                          |        | 3,958155108 | -1,0637778  | <b>-2,09039827</b> | 1,96166207 | 11,7331987 | 0,00061395  | 0,003357624 | protein_coding |
| ENSMUSG00000078937 | Cpt1b         | camitine palmitoyltransferase 1b, muscle [Source:MGI Symbol;Acc:MGI:1098297]                                                        |        | 5,724000086 | -1,0657809  | <b>-2,09330264</b> | 2,48282913 | 12,552257  | 0,000395728 | 0,002285943 | protein_coding |
| ENSMUSG00000006517 | Mvd           | mevalonate (diphospho) decarboxylase [Source:MGI Symbol;Acc:MGI:2179327]                                                            |        | 29,95       |             |                    |            |            |             |             |                |

|                    |               |                                                                                                                        |             |            |                    |            |            |             |             |                     |
|--------------------|---------------|------------------------------------------------------------------------------------------------------------------------|-------------|------------|--------------------|------------|------------|-------------|-------------|---------------------|
| ENSMUSG00000032216 | Nedd4         | neural precursor cell expressed, developmentally down-regulated 4 [Source:MGI Symbol;Acc:MGI:192247]                   | 11,83681239 | -1,070609  | <b>-2,10031975</b> | 5,38850792 | 18,0139887 | 2,19288E-05 | 0,000176765 | protein_coding      |
| ENSMUSG00000022261 | Sdc2          | syndecan 2 [Source:MGI Symbol;Acc:MGI:1349165]                                                                         | 4,265301781 | -1,0710442 | <b>-2,10095338</b> | 2,06789803 | 12,3907659 | 0,000431462 | 0,002462585 | protein_coding      |
| ENSMUSG00000059895 | Ptp4a3        | protein tyrosine phosphatase 4a3 [Source:MGI Symbol;Acc:MGI:1277098]                                                   | 80,56139785 | -1,0749735 | <b>-2,10668334</b> | 6,3271101  | 50,9781442 | 9,34002E-13 | 2,766E-11   | protein_coding      |
| ENSMUSG00000052539 | Magi3         | membrane associated guanylate kinase, VVV and PDZ domain containing 3 [Source:MGI Symbol;Acc:MGI:1923484]              | 12,16850534 | -1,0784551 | <b>-2,11175889</b> | 3,59785068 | 27,5609603 | 1,5222E-07  | 1,90276E-06 | protein_coding      |
| ENSMUSG00000059824 | Dbp           | D site albumin promoter binding protein [Source:MGI Symbol;Acc:MGI:94866]                                              | 11,98950603 | -1,079698  | <b>-2,11359356</b> | 3,56180745 | 19,718952  | 8,97073E-06 | 7,88491E-05 | protein_coding      |
| ENSMUSG00000074794 | Arrdc3        | arrestin domain containing 3 [Source:MGI Symbol;Acc:MGI:2145242]                                                       | 16,79657976 | -1,0812413 | <b>-2,11585586</b> | 4,04827639 | 32,8558109 | 9,92539E-09 | 1,58044E-07 | protein_coding      |
| ENSMUSG00000036052 | Dnajb5        | DnaJ (Hsp40) homolog, subfamily B, member 5 [Source:MGI Symbol;Acc:MGI:1930018]                                        | 21,66719958 | -1,0834055 | <b>-2,11903219</b> | 4,42369752 | 35,587922  | 2,43794E-09 | 4,31375E-08 | protein_coding      |
| ENSMUSG00000058709 | Egln2         | EGL nine homolog 2 (C. elegans) [Source:MGI Symbol;Acc:MGI:1932287]                                                    | 165,8947232 | -1,0851608 | <b>-2,12161187</b> | 7,37125323 | 42,5791065 | 6,78806E-11 | 1,557E-09   | protein_coding      |
| ENSMUSG00000024232 | Bambi         | BMP and activin membrane-bound inhibitor, homolog (Xenopus laevis) [Source:MGI Symbol;Acc:MGI:1915260]                 | 16,36768585 | -1,0865097 | <b>-2,12359651</b> | 4,01286087 | 26,3754536 | 2,8109E-07  | 3,37523E-06 | protein_coding      |
| ENSMUSG00000064360 | mt-Nd3        | mitochondrially encoded NADH dehydrogenase 3 [Source:MGI Symbol;Acc:MGI:102499]                                        | 111,0259805 | -1,0865761 | <b>-2,12369434</b> | 6,79352398 | 53,5160763 | 2,56485E-13 | 8,3127E-12  | protein_coding      |
| ENSMUSG00000068686 | Cd59b         | CD59b antigen [Source:MGI Symbol;Acc:MGI:1888996]                                                                      | 2,860396011 | -1,0918954 | <b>-2,13153894</b> | 1,49255928 | 8,50891836 | 0,003534101 | 0,015179501 | protein_coding      |
| ENSMUSG00000024378 | Stard4        | STAR-related lipid transfer (START) domain containing 4 [Source:MGI Symbol;Acc:MGI:2156764]                            | 61,69797357 | -1,0940619 | <b>-2,13474227</b> | 5,94272371 | 19,4498515 | 1,03276E-05 | 8,92755E-05 | protein_coding      |
| ENSMUSG00000097142 |               |                                                                                                                        | 1652,119203 | -1,0968669 | <b>-2,13889688</b> | 10,6901164 | 22,2362866 | 2,41074E-06 | 2,41668E-05 | lincRNA             |
| ENSMUSG00000015202 | Cnksr3        | Cnksr family member 3 [Source:MGI Symbol;Acc:MGI:2674130]                                                              | 134,3089055 | -1,0990274 | <b>-2,14210239</b> | 7,06866614 | 29,3597689 | 6,01127E-08 | 8,29722E-07 | protein_coding      |
| ENSMUSG00000003283 | Hck           | hemopoietic cell kinase [Source:MGI Symbol;Acc:MGI:96052]                                                              | 507,8651316 | -1,0994132 | <b>-2,14267527</b> | 8,9880917  | 29,6972516 | 5,05064E-08 | 7,08702E-07 | protein_coding      |
| ENSMUSG00000038540 | Tmc3          | transmembrane channel-like gene family 3 [Source:MGI Symbol;Acc:MGI:2669033]                                           | 39,5126993  | -1,1023759 | <b>-2,14707996</b> | 5,31016395 | 26,8968243 | 2,14611E-07 | 2,61412E-06 | protein_coding      |
| ENSMUSG00000028555 | Ttc39a        | tetrapeptide repeat domain 39A [Source:MGI Symbol;Acc:MGI:2444350]                                                     | 2,904401203 | -1,1034163 | <b>-2,14862891</b> | 1,50886419 | 9,69920365 | 0,001843479 | 0,008756724 | protein_coding      |
| ENSMUSG00000030906 | Rsad1         | radical S-adenosyl methionine domain containing 1 [Source:MGI Symbol;Acc:MGI:3039628]                                  | 22,54713462 | -1,1061186 | <b>-2,15265721</b> | 4,48074391 | 37,2028689 | 1,06457E-09 | 2,00281E-08 | protein_coding      |
| ENSMUSG00000079317 | Trappc2       | trafficking protein particle complex 2 [Source:MGI Symbol;Acc:MGI:1913476]                                             | 77,49083362 | -1,1091927 | <b>-2,15724893</b> | 6,27499587 | 46,5967592 | 8,72044E-02 | 2,26505E-10 | protein_coding      |
| ENSMUSG00000059277 | R74862        | expressed sequence R74862 [Source:MGI Symbol;Acc:MGI:2142382]                                                          | 2,059664723 | -1,1119106 | <b>-2,16131687</b> | 1,00575031 | 7,77670881 | 0,005292413 | 0,0212606   | lincRNA             |
| ENSMUSG00000060512 | 0610040J01Rik | RIKEN cDNA 0610040J01 gene [Source:MGI Symbol;Acc:MGI:1923511]                                                         | 5,935489632 | -1,111929  | <b>-2,16134445</b> | 2,56105671 | 16,08888   | 6,04379E-05 | 0,00043715  | protein_coding      |
| ENSMUSG00000035356 | Nfkbi2        | nuclear factor of kappa light polypeptide gene enhancer in B cells inhibitor, zeta [Source:MGI Symbol;Acc:MGI:1931595] | 584,0145074 | -1,1143169 | <b>-2,16492476</b> | 9,18964746 | 31,3222872 | 2,18556E-08 | 3,27149E-07 | protein_coding      |
| ENSMUSG00000018417 | Myo1b         | myosin 1B [Source:MGI Symbol;Acc:MGI:107752]                                                                           | 83,29308017 | -1,1159866 | <b>-2,16743185</b> | 6,37695951 | 61,0972269 | 5,43246E-15 | 2,24385E-13 | protein_coding      |
| ENSMUSG00000029810 | Tmem176b      | transmembrane protein 176B [Source:MGI Symbol;Acc:MGI:1916348]                                                         | 1116,665097 | -1,1181625 | <b>-2,17073329</b> | 10,1248794 | 23,1019989 | 1,53631E-06 | 1,59995E-05 | protein_coding      |
| ENSMUSG00000032890 | Rims3         | regulating synaptic membrane exocytosis 3 [Source:MGI Symbol;Acc:MGI:2443331]                                          | 103,9648856 | -1,1220284 | <b>-2,17652773</b> | 6,69551827 | 55,9358351 | 7,48753E-14 | 2,6116E-12  | protein_coding      |
| ENSMUSG00000030826 | Bcat2         | branched chain aminotransferase 2, mitochondrial [Source:MGI Symbol;Acc:MGI:1276534]                                   | 162,6890929 | -1,1240426 | <b>-2,17956864</b> | 7,34448086 | 52,6421476 | 4,00208E-13 | 1,24563E-11 | protein_coding      |
| ENSMUSG00000039157 | Fam102a       | family with sequence similarity 102, member A [Source:MGI Symbol;Acc:MGI:2138935]                                      | 47,97968897 | -1,1248388 | <b>-2,18077183</b> | 5,57215912 | 61,5060247 | 4,41391E-15 | 1,85807E-13 | protein_coding      |
| ENSMUSG00000004880 | Lbr           | lamin B receptor [Source:MGI Symbol;Acc:MGI:2138281]                                                                   | 16,02893396 | -1,1248721 | <b>-2,18082208</b> | 3,9920147  | 30,4440093 | 3,43643E-08 | 5,02075E-07 | protein_coding      |
| ENSMUSG00000058258 | ldi1          | isopentenyl-diphosphate delta isomerase [Source:MGI Symbol;Acc:MGI:2442264]                                            | 44,53069896 | -1,1267894 | <b>-2,18372227</b> | 5,47200032 | 13,8712924 | 0,000195773 | 0,001231227 | protein_coding      |
| ENSMUSG00000033105 | Lss           | lanosterol synthase [Source:MGI Symbol;Acc:MGI:1336155]                                                                | 51,59701635 | -1,1296884 | <b>-2,18811147</b> | 5,68316674 | 20,0298508 | 7,62426E-06 | 6,79382E-05 | protein_coding      |
| ENSMUSG00000030878 | Cdr2          | cerebellar degeneration-related 2 [Source:MGI Symbol;Acc:MGI:1100885]                                                  | 27,14108376 | -1,1354182 | <b>-2,19682232</b> | 4,75740761 | 29,1486746 | 6,70316E-08 | 9,16015E-07 | protein_coding      |
| ENSMUSG00000029406 | Ptlnpm2       | phosphatidylinositol transfer protein, membrane-associated 2 [Source:MGI Symbol;Acc:MGI:1336192]                       | 7,591417961 | -1,1374964 | <b>-2,19998915</b> | 2,90702316 | 20,1387169 | 7,20239E-06 | 6,47037E-05 | protein_coding      |
| ENSMUSG00000031389 | Arhgap4       | Rho GTPase activating protein 4 [Source:MGI Symbol;Acc:MGI:2159577]                                                    | 413,8442257 | -1,1375522 | <b>-2,20007419</b> | 8,6922732  | 36,966657  | 1,20167E-09 | 2,22643E-08 | protein_coding      |
| ENSMUSG00000033174 | Mgli1         | monoglyceride lipase [Source:MGI Symbol;Acc:MGI:1346042]                                                               | 2,787128417 | -1,1379089 | <b>-2,20061824</b> | 1,45862978 | 9,66397211 | 0,001879169 | 0,008893666 | protein_coding      |
| ENSMUSG00000020589 | Fam49a        | family with sequence similarity 49, member A [Source:MGI Symbol;Acc:MGI:1261783]                                       | 290,5542119 | -1,1406696 | <b>-2,2048333</b>  | 8,18246211 | 49,9762425 | 1,55619E-12 | 4,5113E-11  | protein_coding      |
| ENSMUSG00000048647 | Exd1          | exonuclease 3'-5' domain containing 1 [Source:MGI Symbol;Acc:MGI:3045306]                                              | 3,862512311 | -1,141074  | <b>-2,20545138</b> | 1,93283107 | 10,2045006 | 0,001400983 | 0,006864    | protein_coding      |
| ENSMUSG00000030472 | Ceacam18      | carcinoembryonic antigen-related cell adhesion molecule 18 [Source:MGI Symbol;Acc:MGI:1919681]                         | 2,324970898 | -1,1452198 | <b>-2,21179824</b> | 1,20676027 | 7,75791007 | 0,005347781 | 0,021451648 | protein_coding      |
| ENSMUSG00000035332 | Gm9821        | predicted gene 9821 [Source:MGI Symbol;Acc:MGI:3704208]                                                                | 9,723810642 | -1,1457707 | <b>-2,21264299</b> | 3,23764528 | 27,0918665 | 1,94013E-07 | 2,38436E-06 | protein_coding      |
| ENSMUSG00000079419 | Ms4a6c        | membrane-spanning 4-domains, subfamily A, member 6C [Source:MGI Symbol;Acc:MGI:2385644]                                | 526,1284061 | -1,1484766 | <b>-2,21679689</b> | 9,03907496 | 31,5539521 | 1,93975E-08 | 2,94365E-07 | protein_coding      |
| ENSMUSG00000026357 | Rgs18         | regulator of G-protein signaling 18 [Source:MGI Symbol;Acc:MGI:1927498]                                                | 28,6357541  | -1,1557783 | <b>-2,22804495</b> | 4,82705385 | 48,7999222 | 2,38585E-12 | 7,98911E-11 | protein_coding      |
| ENSMUSG0000001637  | Cebpdp        | C/CAA1/enhancer binding protein (C/EBP), delta [Source:MGI Symbol;Acc:MGI:103573]                                      | 67,57197655 | -1,1621295 | <b>-2,22787502</b> | 6,07294104 | 33,3375337 | 7,74729E-09 | 1,24992E-07 | accessed_pseudogene |
| ENSMUSG00000023832 | Acat2         | acetyl-Coenzyme A acetyltransferase 2 [Source:MGI Symbol;Acc:MGI:87871]                                                | 31,40093337 | -1,162759  | <b>-2,23885181</b> | 4,96551203 | 14,8001144 | 0,000119526 | 0,000798806 | protein_coding      |
| ENSMUSG00000052889 | Prkcbb        | protein kinase C, beta [Source:MGI Symbol;Acc:MGI:97596]                                                               | 623,3423681 | -1,1681111 | <b>-2,24717293</b> | 9,28363993 | 37,6016289 | 8,6772E-10  | 1,65495E-08 | protein_coding      |
| ENSMUSG00000069607 | Cd300lh       | CD300 antigen like family member H [Source:MGI Symbol;Acc:MGI:2687214]                                                 | 361,9324513 | -1,1702875 | <b>-2,25056543</b> | 8,49967761 | 48,2903687 | 3,67553E-12 | 1,07007E-10 | protein_coding      |
| ENSMUSG00000087691 | Gm15674       | predicted gene 15674 [Source:MGI Symbol;Acc:MGI:3783116]                                                               | 33,46134998 | -1,1706208 | <b>-2,25108541</b> | 5,05014107 | 48,3059963 | 3,64635E-11 | 1,00156E-10 | antisense           |
| ENSMUSG00000034641 | Cd300ld       | CD300 molecule-like family member d [Source:MGI Symbol;Acc:MGI:2442358]                                                | 303,7920537 | -1,1737411 | <b>-2,25595994</b> | 8,24688421 | 42,8243375 | 5,98825E-12 | 1,38804E-09 | protein_coding      |
| ENSMUSG00000030471 | Zdhhc13       | zinc finger, DHHC domain containing 13 [Source:MGI Symbol;Acc:MGI:1919227]                                             | 72,83732128 | -1,1742047 | <b>-2,25668437</b> | 6,18380897 | 43,2493671 | 4,81894E-11 | 1,13617E-09 | protein_coding      |
| ENSMUSG00000021087 | Rtn1          | reticulon 1 [Source:MGI Symbol;Acc:MGI:1933947]                                                                        | 7,69955365  | -1,1748902 | <b>-2,2577569</b>  | 2,9149488  | 17,8941264 | 2,33541E-05 | 0,000186748 | protein_coding      |
| ENSMUSG00000042826 | Fgf11         | fibroblast growth factor 11 [Source:MGI Symbol;Acc:MGI:109167]                                                         | 76,60508414 | -1,1768407 | <b>-2,26081155</b> | 6,25615682 | 51,3899944 | 7,57252E-13 | 2,7321E-11  | protein_coding      |
| ENSMUSG00000031486 | Gpr124        | G protein-coupled receptor 124 [Source:MGI Symbol;Acc:MGI:1925810]                                                     | 2,559267151 | -1,1769588 | <b>-2,26099656</b> | 1,37009936 | 8,719296   | 0,003148596 | 0,013765867 | protein_coding      |
| ENSMUSG00000079038 | D130040H23Rik | RIKEN cDNA D130040H23 gene [Source:MGI Symbol;Acc:MGI:2444324]                                                         | 4,996327146 | -1,1775587 | <b>-2,261937</b>   | 2,30061851 | 14,4452079 | 0,000144297 | 0,00094256  | protein_coding      |
| ENSMUSG00000031385 | Plexinb3      | plexin B3 [Source:MGI Symbol;Acc:MGI:2154240]                                                                          | 13,70958275 | -1,1791336 | <b>-2,26440753</b> | 3,76930623 | 37,039877  | 1,15738E-09 | 2,14799E-08 | protein_coding      |
| ENSMUSG00000028709 | Mob3c         | MOB kinase activator 3C [Source:MGI Symbol;Acc:MGI:2140623]                                                            | 38,89760163 | -1,1808183 | <b>-2,26705321</b> | 5,27423261 | 46,1125329 | 1,11652E-11 | 8,85284E-10 | protein_coding      |
| ENSMUSG00000034266 | Batf          | basic leucine zipper transcription factor, ATF-like [Source:MGI Symbol;Acc:MGI:1859147]                                | 58,72098512 | -1,1810881 | <b>-2,26747736</b> | 5,87388392 | 34,1513364 | 5,09882E-09 | 8,28799E-08 | protein_coding      |
| ENSMUSG00000038332 | Sesn1         | sesn1 [Source:MGI Symbol;Acc:MGI:2155278]                                                                              | 208,4350396 | -1,1825039 | <b>-2,26970357</b> | 7,70132118 | 46,9068336 | 7,44427E-12 | 1,95203E-10 | protein_coding      |
| ENSMUSG00000044350 | Lacc1         | laccase (multicopper oxidoreductase) domain containing 1 [Source:MGI Symbol;Acc:MGI:2445077]                           | 236,7518668 | -1,1827994 | <b>-2,27272904</b> | 7,86640678 | 35,7660069 | 2,22496E-09 | 3,98788E-08 | protein_coding      |
| ENSMUSG00000096255 | Dynll1b       | dynein light chain Tctex-type 1B [Source:MGI Symbol;Acc:MGI:98643]                                                     | 6,197472585 | -1,1934922 | <b>-2,27505678</b> | 2,66671041 | 14,5094242 | 0,00013946  | 0,00091314  | protein_coding      |
| ENSMUSG00000078616 | Trim30c       | tripartite motif-containing 30C [Source:MGI Symbol;Acc:MGI:4821257]                                                    | 4,826622278 | -1,1963456 | <b>-2,2915847</b>  | 2,28571881 | 15,1297633 | 0,00010368  | 0,000682816 | protein_coding      |
| ENSMUSG00000081855 | Rpl17-ps5     | ribosomal protein L17, pseudogene 5 [Source:MGI Symbol;Acc:MGI:3704246]                                                | 2,326337071 | -1,1977375 | <b>-2,29379669</b> | 1,15907518 | 8,21043379 | 0,000165019 | 0,017386424 | pseudogene          |
| ENSMUSG00000028044 | Cks1b         | CDK28 protein kinase 1b [Source:MGI Symbol;Acc:MGI:1889208]                                                            | 18,78420407 | -1,1977673 | <b>-2,29384407</b> | 4,22317861 | 37,8187326 | 7,76327E-10 | 1,49117E-08 | protein_coding      |
| ENSMUSG00000020142 | Slc1a4        | solute carrier family 1 (glutamate/neutral amino acid transporter), member 4 [Source:MGI Symbol;Acc:MGI:2135601]       | 10,73597393 | -1,1985129 | <b>-2,29502976</b> | 3,4025025  | 15,1426971 | 9,96831E-05 | 0,000679416 | protein_coding      |
| ENSMUSG00000063450 | Syne2         | synaptic nuclear envelope 2 [Source:MGI Symbol;Acc:MGI:2449316]                                                        | 8,30079823  | -1,1986261 | <b>-2,29520989</b> | 3,03695206 | 22,4050834 | 2,20789E-06 | 2,22144E-05 | protein_coding      |
| ENSMUSG00000046207 | Pik3r6        | phosphoinositide-3-kinase, regulatory subunit 6 [Source:MGI Symbol;Acc:MGI:2144613]                                    | 89,94599951 | -1,2013364 | <b>-2,29952576</b> | 6,48584566 | 38,0687804 | 6,82942E-10 | 1,31871E-08 |                     |

|                    |               |                                                                                                                                                 |              |             |             |            |             |              |                |                      |
|--------------------|---------------|-------------------------------------------------------------------------------------------------------------------------------------------------|--------------|-------------|-------------|------------|-------------|--------------|----------------|----------------------|
| ENSMUSG00000025792 | Slc25a10      | solute carrier family 25 (mitochondrial carrier, dicarboxylate transporter), member 10 [Source:MGI Symbol;Acc:MGI:1353262,4902229]              | -1,2317632   | -2,34853844 | 8,03512619  | 47,1586093 | 6,54685E-12 | 1,72909E-10  | protein_coding |                      |
| ENSMUSG00000059743 | Fdps          | farnesyl diphosphate synthetase [Source:MGI Symbol;Acc:MGI:104888]                                                                              | 66,03870724  | -1,2402431  | -2,3623833  | 6,04149451 | 16,0303619  | 6,23348E-05  | 0,000450204    | protein_coding       |
| ENSMUSG0000001508  | Sgca          | sarcoglycan, alpha (dystrophin-associated glycoprotein) [Source:MGI Symbol;Acc:MGI:894698]                                                      | 3,895322761  | -1,2406737  | -2,36308862 | 1,94531256 | 11,7078831  | 0,000622359  | 0,003396849    | protein_coding       |
| ENSMUSG00000055202 | Zfp811        | zinc finger protein 811 [Source:MGI Symbol;Acc:MGI:2682944]                                                                                     | 31,09192966  | -1,2464185  | -2,37251713 | 4,94873911 | 65,6059542  | 5,005721E-16 | 2,67733E-14    | protein_coding       |
| ENSMUSG00000044827 | Tlr1          | tol-like receptor 1 [Source:MGI Symbol;Acc:MGI:1341295]                                                                                         | 359,2160426  | -1,259983   | -2,39492919 | 8,48841319 | 35,7845803  | 2,20385E-09  | 3,95649E-08    | protein_coding       |
| ENSMUSG00000017652 | Cd40          | CD40 antigen [Source:MGI Symbol;Acc:MGI:88336]                                                                                                  | 24,96422247  | -1,2622229  | -2,39865042 | 4,64419257 | 50,9432334  | 9,50762E-13  | 2,88070E-11    | protein_coding       |
| ENSMUSG0000004665  | Cnn2          | calponin 2 [Source:MGI Symbol;Acc:MGI:105093]                                                                                                   | 126,9071343  | -1,2670863  | -2,40675007 | 6,9855819  | 61,8902916  | 3,63136E-15  | 1,55244E-13    | protein_coding       |
| ENSMUSG00000052364 | B630019K06Rik | RIKEN cDNA B630019K06 gene [Source:MGI Symbol;Acc:MGI:2147918]                                                                                  | 4,3571895422 | -1,2672491  | -2,40702155 | 2,07265654 | 16,6778524  | 4,42951E-05  | 0,000328831    | protein_coding       |
| ENSMUSG00000047786 | Lix1          | limb expression 1 homolog (chicken) [Source:MGI Symbol;Acc:MGI:1913893]                                                                         | 1,667719046  | -1,2698127  | -2,41130263 | 0,75468334 | 7,61882156  | 0,005776222  | 0,022894427    | protein_coding       |
| ENSMUSG00000096991 |               |                                                                                                                                                 | 2,366168271  | -1,275665   | -2,42110388 | 1,19508229 | 10,9303603  | 0,00946011   | 0,004895724    | lincRNA              |
| ENSMUSG00000015852 | Fcrls         | Fc receptor-like S, scavenger receptor [Source:MGI Symbol;Acc:MGI:1933397]                                                                      | 3710,161412  | -1,2796935  | -2,42787394 | 11,8572322 | 21,9772604  | 2,75904E-06  | 2,73096E-05    | protein_coding       |
| ENSMUSG00000026458 | Ppfia4        | protein tyrosine phosphatase, receptor type, f polypeptide (PTPRF), interacting protein (liprin), alpha 4 [Source:MGI Symbol;Acc:MGI:139566561] | 13,39566561  | -1,2817992  | -2,43142021 | 3,72131152 | 20,9906248  | 4,61536E-06  | 4,36019E-05    | protein_coding       |
| ENSMUSG00000087412 | Gm15501       | predicted pseudogene 15501 [Source:MGI Symbol;Acc:MGI:3704296]                                                                                  | 14,74107863  | -1,2824791  | -2,43256618 | 3,84017996 | 17,2675156  | 3,2469E-05   | 0,000243959    | pseudogene           |
| ENSMUSG00000009292 | Trpm2         | transient receptor potential cation channel, subfamily M, member 2 [Source:MGI Symbol;Acc:MGI:1351901]                                          | 53,33265586  | -1,2859649  | -2,43845088 | 5,72591603 | 54,5444112  | 1,51974E-13  | 5,09067E-12    | protein_coding       |
| ENSMUSG00000040724 | Kcna2         | potassium voltage-gated channel, shaker-related subfamily, member 2 [Source:MGI Symbol;Acc:MGI:96659]                                           | 3,50764416   | -1,2860275  | -2,43855662 | 1,84295861 | 14,0613004  | 0,000176947  | 0,00112507     | protein_coding       |
| ENSMUSG00000033768 | Nrxn2         | neuroligin II [Source:MGI Symbol;Acc:MGI:1096362]                                                                                               | 38,09537487  | -1,2868113  | -2,43988184 | 5,24365988 | 47,954409   | 4,36246E-12  | 1,18055E-10    | protein_coding       |
| ENSMUSG00000043257 | Pigv          | phosphatidylinositol glycan anchor biosynthesis, class V [Source:MGI Symbol;Acc:MGI:2442480]                                                    | 21,28494706  | -1,288525   | -2,44278182 | 4,40025028 | 31,6322483  | 1,8631E-08   | 8,28909E-07    | protein_coding       |
| ENSMUSG00000049744 | Arhgap15      | Rho GTPase activating protein 15 [Source:MGI Symbol;Acc:MGI:1923367]                                                                            | 28,88829173  | -1,2931138  | -2,45056397 | 4,83852736 | 61,7496445  | 3,90022E-15  | 1,65451E-13    | protein_coding       |
| ENSMUSG00000073412 | Lst1          | leukocyte specific transcript 1 [Source:MGI Symbol;Acc:MGI:1096324]                                                                             | 298,3069071  | -1,2957527  | -2,45505045 | 8,21979187 | 57,0398444  | 4,27071E-14  | 1,56408E-12    | protein_coding       |
| ENSMUSG00000040010 | Slc7a5        | solute carrier family 7 (cationic amino acid transporter, y+ system), member 5 [Source:MGI Symbol;Acc:MGI:1298205]                              | 40,09213284  | -1,2971519  | -2,45743266 | 5,31633463 | 28,5110728  | 9,31642E-08  | 1,23028E-06    | protein_coding       |
| ENSMUSG00000079481 | Nhs12         | NHS-like 2 [Source:MGI Symbol;Acc:MGI:3645090]                                                                                                  | 31,79768123  | -1,2996266  | -2,46165161 | 4,98231626 | 41,9717185  | 9,26031E-11  | 2,06375E-09    | protein_coding       |
| ENSMUSG00000057191 | AB124611      | cDNA sequence AB124611 [Source:MGI Symbol;Acc:MGI:3043001]                                                                                      | 180,5476644  | -1,3048923  | -2,47065288 | 7,43938486 | 46,1137358  | 1,11583E-11  | 2,85284E-10    | protein_coding       |
| ENSMUSG00000049612 | Omg           | oligodendrocyte myelin glycoprotein [Source:MGI Symbol;Acc:MGI:106586]                                                                          | 2,93021745   | -1,3083972  | -2,47666243 | 1,52662433 | 12,7790635  | 0,00035052   | 0,002052861    | protein_coding       |
| ENSMUSG00000024845 | Tmem134       | transmembrane protein 134 [Source:MGI Symbol;Acc:MGI:1914240]                                                                                   | 200,6796849  | -1,3103567  | -2,48002858 | 7,64663239 | 59,3458889  | 1,32256E-14  | 5,15283E-13    | processed_transcript |
| ENSMUSG00000048721 | Fndc9         | fibronectin type III domain containing 9 [Source:MGI Symbol;Acc:MGI:2443410]                                                                    | 2,013300915  | -1,310849   | -2,48087489 | 1,00478891 | 8,87069435  | 0,002897849  | 0,012383172    | protein_coding       |
| ENSMUSG00000039304 | Tnfrsf10      | tumor necrosis factor (ligand) superfamily, member 10 [Source:MGI Symbol;Acc:MGI:107414]                                                        | 10,05503667  | -1,3112865  | -2,48162738 | 3,31669733 | 24,2001877  | 8,68238E-07  | 9,59691E-06    | protein_coding       |
| ENSMUSG00000059742 | Kcnh7         | potassium voltage-gated channel, subfamily H (eag-related), member 7 [Source:MGI Symbol;Acc:MGI:2159566]                                        | 2,022466588  | -1,3136874  | -2,48576071 | 1,01494854 | 10,5927102  | 0,001135344  | 0,005716786    | protein_coding       |
| ENSMUSG00000029185 | Fam114a1      | family with sequence similarity 114, member A1 [Source:MGI Symbol;Acc:MGI:1915553]                                                              | 69,39688383  | -1,3172553  | -2,49191576 | 6,11497467 | 44,3289505  | 2,77581E-11  | 6,7324E-10     | protein_coding       |
| ENSMUSG00000087362 | Gm13710       | predicted gene 13710 [Source:MGI Symbol;Acc:MGI:3650894]                                                                                        | 9,47178676   | -1,3175002  | -2,49233878 | 3,1888768  | 33,1621138  | 4,87865E-09  | 1,35597E-07    | lincRNA              |
| ENSMUSG00000040520 | Manea         | mannosidase, endo-alpha [Source:MGI Symbol;Acc:MGI:2444484]                                                                                     | 124,0648985  | -1,3270525  | -2,50889578 | 6,9521181  | 70,8756638  | 3,80462E-17  | 2,05909E-15    | protein_coding       |
| ENSMUSG00000079363 | Gbp4          | guanylate binding protein 4 [Source:MGI Symbol;Acc:MGI:97072]                                                                                   | 1,887545786  | -1,3282718  | -2,5110107  | 0,94473022 | 9,1948283   | 0,002426999  | 0,011073685    | protein_coding       |
| ENSMUSG00000036330 | Slc18a1       | solute carrier family 18 (vesicular monoamine), member 1 [Source:MGI Symbol;Acc:MGI:106684]                                                     | 8,728239897  | -1,3334776  | -2,52009413 | 3,11472507 | 32,1008106  | 1,46376E-08  | 2,26356E-07    | protein_coding       |
| ENSMUSG00000002699 | Lcp2          | lymphocyte cytosolic protein 2 [Source:MGI Symbol;Acc:MGI:1321402]                                                                              | 415,6792528  | -1,3346934  | -2,52221873 | 8,69912153 | 42,0139624  | 9,0624E-11   | 2,02787E-09    | protein_coding       |
| ENSMUSG00000032356 | Rasgrf1       | RAS protein-specific guanine nucleotide-releasing factor 1 [Source:MGI Symbol;Acc:MGI:99694]                                                    | 6,021429449  | -1,3397294  | -2,53103842 | 2,57326988 | 15,190347   | 9,7199E-05   | 0,000663308    | protein_coding       |
| ENSMUSG00000002104 | Rapsn         | receptor-associated protein of the synapse [Source:MGI Symbol;Acc:MGI:99422]                                                                    | 3,688170498  | -1,3417635  | -2,5346095  | 1,83491153 | 9,4040357   | 0,002165084  | 0,010443308    | protein_coding       |
| ENSMUSG00000005125 | Ndr1g         | N-myc downstream regulated gene 1 [Source:MGI Symbol;Acc:MGI:1341799]                                                                           | 2759,827188  | -1,3431881  | -2,53711364 | 11,4303323 | 25,1116841  | 5,4104E-07   | 6,12092E-06    | protein_coding       |
| ENSMUSG00000031434 | Morc4         | mirorchidia 4 [Source:MGI Symbol;Acc:MGI:1922996]                                                                                               | 84,50450771  | -1,3456273  | -2,5414068  | 6,3985154  | 88,6557636  | 4,69856E-21  | 4,12984E-19    | protein_coding       |
| ENSMUSG00000016763 | Scube1        | signal peptide, CUB domain, EGF-like 1 [Source:MGI Symbol;Acc:MGI:1890616]                                                                      | 1,995898546  | -1,3490865  | -2,54750767 | 1,02132175 | 10,6720746  | 0,001087251  | 0,005512001    | protein_coding       |
| ENSMUSG00000008305 | Tie1          | transducin-like enhancer of split 1, homolog of Drosophila E(spl) [Source:MGI Symbol;Acc:MGI:1046336]                                           | 30,65522632  | -1,3624813  | -2,57127033 | 4,93197426 | 63,3242175  | 1,75335E-15  | 7,9934E-14     | protein_coding       |
| ENSMUSG00000001249 | Hpn           | hepsin [Source:MGI Symbol;Acc:MGI:1196620]                                                                                                      | 42,16819248  | -1,3656106  | -2,57685356 | 5,39236895 | 42,6188834  | 6,65142E-11  | 1,52885E-09    | protein_coding       |
| ENSMUSG00000078670 | Fam174b       | family with sequence similarity 174, member B [Source:MGI Symbol;Acc:MGI:3698178]                                                               | 15,33345619  | -1,3719174  | -2,58114319 | 3,92851764 | 44,9193388  | 2,0532E-11   | 5,05796E-10    | protein_coding       |
| ENSMUSG00000026815 | Gfi1b         | Growth factor independent 1B [Source:MGI Symbol;Acc:MGI:1276578]                                                                                | 8,589244016  | -1,3790908  | -2,60104407 | 3,0825821  | 30,3288458  | 3,64662E-08  | 5,27177E-07    | protein_coding       |
| ENSMUSG00000015854 | Cd5l          | CD5 antigen-like [Source:MGI Symbol;Acc:MGI:1334419]                                                                                            | 1973,355342  | -1,3812829  | -2,60499913 | 10,9463244 | 32,1678644  | 1,4141E-08   | 2,19446E-07    | protein_coding       |
| ENSMUSG00000037347 | Chst7         | carbohydrate (N-acetylglucosamine) sulfotransferase 7 [Source:MGI Symbol;Acc:MGI:1891767]                                                       | 19,05352789  | -1,3840209  | -2,60994771 | 4,24126048 | 39,356354   | 3,53102E-10  | 7,26504E-09    | protein_coding       |
| ENSMUSG00000097485 |               | Cyclin-dependent kinase 2-associated protein 2 [Source:UniProtKB/TrEMBL;Acc:G3UX88]                                                             | 39,65563027  | -1,3880169  | -2,61718679 | 5,29790519 | 45,1239082  | 1,84954E-11  | 4,6151E-10     | protein_coding       |
| ENSMUSG00000024856 | Cdk2ap2       | CDK2-associated protein 2 [Source:MGI Symbol;Acc:MGI:1098779]                                                                                   | 39,65563027  | -1,3880182  | -2,61718916 | 5,29790599 | 45,1208526  | 1,85242E-11  | 4,6151E-10     | protein_coding       |
| ENSMUSG00000089753 | Gm11709       | predicted gene 11709 [Source:MGI Symbol;Acc:MGI:3649405]                                                                                        | 5,367595226  | -1,3916745  | -2,62383051 | 2,41588922 | 17,0926345  | 3,56001E-05  | 0,000269937    | protein_coding       |
| ENSMUSG00000048107 | Kctd12        | potassium channel tetramerisation domain containing 12 [Source:MGI Symbol;Acc:MGI:2145823]                                                      | 409,5762753  | -1,393401   | -2,62697232 | 8,67483037 | 61,4639391  | 4,50927E-15  | 1,89097E-13    | processed_pseudogene |
| ENSMUSG00000045730 | Adrb2         | adrenergic receptor, beta 2 [Source:MGI Symbol;Acc:MGI:87938]                                                                                   | 24,00848838  | -1,4018515  | -2,64240403 | 4,57121785 | 56,1861223  | 6,59252E-14  | 2,35169E-12    | protein_coding       |
| ENSMUSG00000080875 | Gm7332        | predicted gene 7332 [Source:MGI Symbol;Acc:MGI:3643344]                                                                                         | 9,737954855  | -1,4029911  | -2,64449289 | 3,28062989 | 16,8786681  | 3,98427E-05  | 0,000299326    | pseudogene           |
| ENSMUSG00000022372 | Sla           | src-like adaptor [Source:MGI Symbol;Acc:MGI:104295]                                                                                             | 274,8978275  | -1,4036955  | -2,64578433 | 8,10201223 | 43,073617   | 5,27184E-11  | 1,235E-09      | protein_coding       |
| ENSMUSG00000029153 | Ociad2        | OClA domain containing 2 [Source:MGI Symbol;Acc:MGI:1916377]                                                                                    | 14,10227805  | -1,4210097  | -2,67772849 | 3,81007444 | 52,8210968  | 3,65356E-13  | 1,15019E-11    | protein_coding       |
| ENSMUSG00000075254 | Heg1          | HEG homolog 1 (zebrafish) [Source:MGI Symbol;Acc:MGI:1924696]                                                                                   | 93,01777871  | -1,424349   | -2,68393362 | 6,54138293 | 68,2410213  | 1,44684E-16  | 7,42826E-15    | protein_coding       |
| ENSMUSG00000056592 | Zfp658        | zinc finger protein 658 [Source:MGI Symbol;Acc:MGI:2652821]                                                                                     | 10,04647063  | -1,4251147  | -2,68535849 | 3,1275328  | 29,77844    | 4,84349E-08  | 6,82248E-07    | protein_coding       |
| ENSMUSG00000045886 | Gm9803        | predicted gene 9803 [Source:MGI Symbol;Acc:MGI:3704359]                                                                                         | 6,010867954  | -1,4341248  | -2,70218198 | 2,58792274 | 7,93888172  | 0,004838373  | 0,019641921    | protein_coding       |
| ENSMUSG00000090936 | Gm17705       | predicted gene, 17705 [Source:MGI Symbol;Acc:MGI:4937339]                                                                                       | 19,94645334  | -1,4374408  | -2,70839992 | 4,30318505 | 47,009767   | 7,06338E-12  | 1,86559E-10    | lincRNA              |
| ENSMUSG00000023367 | Tmem176a      | transmembrane protein 176A [Source:MGI Symbol;Acc:MGI:1913308]                                                                                  | 632,4906275  | -1,4418514  | -2,71669264 | 9,30457927 | 38,5526866  | 5,32249E-10  | 1,05747E-08    | protein_coding       |
| ENSMUSG00000033577 | Myo6          | myosin VI [Source:MGI Symbol;Acc:MGI:104785]                                                                                                    | 12,85521981  | -1,4457467  | -2,72403769 | 3,6714972  | 44,1671376  | 3,01501E-11  | 7,26445E-10    | protein_coding       |
| ENSMUSG00000096334 | Sh2d1b1       | SH2 domain protein 1B1 [Source:MGI Symbol;Acc:MGI:1349420]                                                                                      | 9,892031907  | -1,4488484  | -2,72990047 | 3,28126683 | 33,9264669  | 5,72348E-09  | 9,48475E-08    | protein_coding       |
| ENSMUSG00000037995 | Igfb9         | immunoglobulin superfamily, member 9 [Source:MGI Symbol;Acc:MGI:2135283]                                                                        | 64,12500538  | -1,44904    | -2,73026311 | 5,99448239 | 76,2439338  | 2,50702E-18  | 1,53025E-16    | protein_coding       |
| ENSMUSG00000045294 | Insig1        | insulin induced gene 1 [Source:MGI Symbol;Acc:MGI:1916289]                                                                                      | 81,83158806  | -1,4592603  | -2,74967347 | 6,35095456 | 30,2459387  | 3,80587E-08  | 5,48755E-07    | protein_coding       |
| ENSMUSG00000024397 | Aif1          | allograft inflammatory factor 1 [Source:MGI Symbol;Acc:MGI:1343098]                                                                             | 472,970096   | -1,4607047  | -2,75242773 | 8,88529345 | 55,02285    | 1,19137E-13  | 4,06508E-12    | protein_coding       |
| ENSMUSG00000044456 | Rin3          | Ras and Rab interactor 3 [Source:MGI Symbol;Acc:MGI:2385708]                                                                                    | 105,0769853  | -1,4645502  | -2,7597741  | 6,71104669 | 44,9559361  | 2,01518E-11  | 4,97807E-10    | protein_coding       |
| ENSMUSG00000022844 | Pdia5         | protein disulfide isomerase associated 5 [Source:MGI Symbol;Acc:MGI:1919849]                                                                    | 7,70449666   | -1,4667715  | -2,76402653 | 2,94201127 | 22,6092166  | 1,9853E-06   | 2,0253E-05     | protein_coding       |
| ENSMUSG00000039081 | Zfp503        | zinc finger protein 503 [Source:MGI Symbol;Acc:MGI:1353644]                                                                                     | 14,52994129  | -1          |             |            |             |              |                |                      |

|                     |                 |                                                                                                                                    |        |              |            |             |            |            |             |             |                |
|---------------------|-----------------|------------------------------------------------------------------------------------------------------------------------------------|--------|--------------|------------|-------------|------------|------------|-------------|-------------|----------------|
| ENSMUSG00000037318  | Traf3ip3        | TRAF3 interacting protein 3 [Source:MGI Symbol;Acc:MGI:2441706]                                                                    |        | 28,25468956  | -1,5028907 | -2,83409999 | 4,80798623 | 40,9362597 | 1,57276E-10 | 3,38822E-09 | protein_coding |
| ENSMUSG00000024013  | Fgd2            | FYVE, RhoGEF and PH domain containing 2 [Source:MGI Symbol;Acc:MGI:1347084]                                                        | Sheet1 | 225,0690629  | -1,5120562 | -2,85216256 | 7,81211844 | 57,7090803 | 3,03897E-14 | 1,12421E-12 | protein_coding |
| ENSMUSG00000030621  | Me3             | malic enzyme 3, NADP(+)-dependent, mitochondrial [Source:MGI Symbol;Acc:MGI:1916679]                                               |        | 2,367177548  | -1,5167075 | -2,86137293 | 1,18562366 | 15,136619  | 0,000100005 | 0,000680897 | protein_coding |
| ENSMUSG00000030711  | Sult1a1         | sulfotransferase family 1A, phenol-preferring, member 1 [Source:MGI Symbol;Acc:MGI:102896]                                         |        | 2,057816212  | -1,5289531 | -2,88576351 | 1,01274323 | 12,6006852 | 0,000385605 | 0,002240426 | protein_coding |
| ENSMUSG00000050199  | Lgr4            | leucine-rich repeat-containing G protein-coupled receptor 4 [Source:MGI Symbol;Acc:MGI:1891468]                                    |        | 6,665210807  | -1,5297365 | -2,88733089 | 2,71136791 | 25,6533747 | 4,0858E-07  | 4,72037E-06 | protein_coding |
| ENSMUSG00000051236  | MsrB3           | methionine sulfoxide reductase B3 [Source:MGI Symbol;Acc:MGI:2443538]                                                              |        | 4,916338096  | -1,5305825 | -2,89024267 | 2,29979286 | 25,7312486 | 3,92421E-07 | 4,56247E-06 | protein_coding |
| ENSMUSG00000079559  | Gm684           | predicted gene 684 [Source:MGI Symbol;Acc:MGI:2685530]                                                                             |        | 4,468153617  | -1,5374765 | -2,90286309 | 2,13647674 | 15,0044042 | 0,000107261 | 0,000724767 | protein_coding |
| ENSMUSG00000026655  | Fam107b         | family with sequence similarity 107, member B [Source:MGI Symbol;Acc:MGI:1913790]                                                  |        | 138,8366265  | -1,5411656 | -2,91029547 | 7,1144475  | 68,1826634 | 1,4903E-16  | 7,15719E-15 | protein_coding |
| ENSMUSG00000026630  | Batf3           | basic leucine zipper transcription factor, ATF-like 3 [Source:MGI Symbol;Acc:MGI:1925491]                                          |        | 16,3479757   | -1,5431613 | -2,91432412 | 4,01878739 | 41,8128052 | 1,00443E-10 | 2,24494E-09 | protein_coding |
| ENSMUSG0000009145   | Dqx1            | DEAQ RNA-dependent ATPase [Source:MGI Symbol;Acc:MGI:2136388]                                                                      |        | 2,776841228  | -1,5432692 | -2,91454206 | 1,44461411 | 14,1410853 | 0,000169599 | 0,001084297 | protein_coding |
| ENSMUSG00000027750  | Postn           | periostin, osteoblast specific factor [Source:MGI Symbol;Acc:MGI:1926321]                                                          |        | 9,747932871  | -1,5441694 | -2,91636114 | 3,31759068 | 44,9549132 | 2,01624E-11 | 4,97807E-10 | protein_coding |
| ENSMUSG00000035275  | Raver2          | ribonucleoprotein, PTB-binding 2 [Source:MGI Symbol;Acc:MGI:2443623]                                                               |        | 216,1992468  | -1,5460111 | -2,92008633 | 7,7551261  | 56,5981864 | 5,34611E-14 | 1,93216E-12 | protein_coding |
| ENSMUSG00000020717  | Pecam1          | platelet/endothelial cell adhesion molecule 1 [Source:MGI Symbol;Acc:MGI:97537]                                                    |        | 21,08276466  | -1,5554016 | -2,93915523 | 4,38313997 | 39,1335161 | 3,95791E-10 | 8,06782E-09 | protein_coding |
| ENSMUSG00000023032  | Slc4a8          | solute carrier family 4 (anion exchanger), member 8 [Source:MGI Symbol;Acc:MGI:1928745]                                            |        | 3,749458662  | -1,5625662 | -2,95378779 | 1,86170035 | 20,1885888 | 7,01703E-06 | 6,32973E-05 | protein_coding |
| ENSMUSG0000004328   | Hif3a           | hypoxia inducible factor 3, alpha subunit [Source:MGI Symbol;Acc:MGI:1859778]                                                      |        | 7,150145371  | -1,5628367 | -2,95434164 | 2,82014599 | 24,6314119 | 6,9411E-07  | 7,75019E-06 | protein_coding |
| ENSMUSG00000034926  | Dhcr24          | 24-dehydrocholesterol reductase [Source:MGI Symbol;Acc:MGI:1922004]                                                                |        | 40,54635481  | -1,5703551 | -2,96977801 | 5,33603161 | 15,4720454 | 8,37345E-05 | 0,000584493 | protein_coding |
| ENSMUSG00000045282  | Tmem86b         | transmembrane protein 86B [Source:MGI Symbol;Acc:MGI:1915500]                                                                      |        | 2,341448051  | -1,576185  | -2,98180312 | 1,21179438 | 13,4617394 | 0,001491133 | 0,001491133 | protein_coding |
| ENSMUSG00000039899  | Fgl2            | fibrinogen-like protein 2 [Source:MGI Symbol;Acc:MGI:103266]                                                                       |        | 2003,179043  | -1,5772992 | -2,98410692 | 10,9679941 | 37,1360569 | 1,10168E-09 | 2,06203E-08 | protein_coding |
| ENSMUSG00000040297  | Suco            | SUN domain containing ossification factor [Source:MGI Symbol;Acc:MGI:2138346]                                                      |        | 224,5064108  | -1,5867923 | -3,00380744 | 7,80983002 | 86,9115527 | 1,13485E-20 | 9,10113E-19 | protein_coding |
| ENSMUSG00000034145  | Tmem63c         | transmembrane protein 63c [Source:MGI Symbol;Acc:MGI:2444386]                                                                      |        | 31,21520405  | -1,5887208 | -3,00782536 | 4,95860641 | 56,6759831 | 5,13873E-14 | 1,86334E-12 | protein_coding |
| ENSMUSG00000031155  | Pim2            | proviral integration site 2 [Source:MGI Symbol;Acc:MGI:97587]                                                                      |        | 144,2347977  | -1,5972442 | -3,02664806 | 7,17058144 | 72,7299925 | 1,48658E-17 | 8,37591E-16 | protein_coding |
| ENSMUSG00000085389  | 1700003M07RIKEN | RIKEN cDNA 1700003M07 gene [Source:MGI Symbol;Acc:MGI:1919475]                                                                     |        | 23,26411893  | -1,6022454 | -3,03615487 | 4,52962799 | 49,2806351 | 2,21842E-12 | 6,33679E-11 | lincRNA        |
| ENSMUSG0000006576   | Slc4a3          | solute carrier family 4 (anion exchanger), member 3 [Source:MGI Symbol;Acc:MGI:109350]                                             |        | 31,55838171  | -1,606141  | -3,0443642  | 4,96897884 | 60,8431483 | 6,18083E-15 | 2,53391E-13 | protein_coding |
| ENSMUSG00000034438  | Gbp8            | guanylate-binding protein 8 [Source:MGI Symbol;Acc:MGI:1923324]                                                                    |        | 3,971092587  | -1,6089054 | -3,04597772 | 1,94712689 | 17,4912328 | 2,88636E-05 | 0,000224602 | protein_coding |
| ENSMUSG00000020785  | Camkk1          | calcium/calmodulin-dependent protein kinase kinase 1, alpha [Source:MGI Symbol;Acc:MGI:1891766]                                    |        | 10,17450631  | -1,6085868 | -3,04952972 | 3,32620521 | 25,0869907 | 5,48013E-07 | 6,21364E-06 | protein_coding |
| ENSMUSG00000074342  | 1830077J02RIKEN | RIKEN cDNA I830077J02 gene [Source:MGI Symbol;Acc:MGI:3588284]                                                                     |        | 6,931197944  | -1,6236975 | -3,08163819 | 2,76250175 | 23,5054158 | 1,24563E-06 | 1,3172E-05  | protein_coding |
| ENSMUSG00000039943  | P1cb4           | phospholipase C, beta 4 [Source:MGI Symbol;Acc:MGI:107464]                                                                         |        | 5,027981827  | -1,64097   | -3,11875457 | 2,29174549 | 28,7646639 | 8,17287E-08 | 1,08975E-06 | protein_coding |
| ENSMUSG00000041132  | N4bp2l1         | NEDD4 binding protein 2-like 1 [Source:MGI Symbol;Acc:MGI:2140872]                                                                 |        | 31,70296399  | -1,6458278 | -3,12927367 | 4,97415695 | 62,1104383 | 3,24726E-15 | 1,41578E-13 | protein_coding |
| ENSMUSG00000030830  | Itgal           | integrin alpha L [Source:MGI Symbol;Acc:MGI:96606]                                                                                 |        | 1399,134373  | -1,6504672 | -3,13935279 | 10,4502533 | 42,0248161 | 9,01224E-11 | 2,02077E-09 | protein_coding |
| ENSMUSG00000037922  | Bank1           | B cell scaffold protein with ankryrin repeats 1 [Source:MGI Symbol;Acc:MGI:2442120]                                                |        | 4,2058836    | -1,6505566 | -3,1395475  | 2,05255435 | 19,7221046 | 8,95949E-06 | 7,87822E-05 | protein_coding |
| ENSMUSG00000036526  | Card11          | caspase recruitment domain family, member 11 [Source:MGI Symbol;Acc:MGI:1916978]                                                   |        | 106,139399   | -1,6557901 | -3,15095704 | 6,72393522 | 86,0791018 | 1,7288E-20  | 1,35674E-18 | protein_coding |
| ENSMUSG00000030683  | Sez6l2          | seizure related 6 homolog like 2 [Source:MGI Symbol;Acc:MGI:2385295]                                                               |        | 56,41254645  | -1,6672285 | -3,17603877 | 5,81293119 | 99,0690258 | 2,43853E-23 | 2,55163E-21 | protein_coding |
| ENSMUSG00000092901  | Mir5130         | microRNA 5130 [Source:MGI Symbol;Acc:MGI:4950455]                                                                                  |        | 3,875320173  | -1,6748695 | -3,19290465 | 1,88836267 | 21,5468557 | 3,45288E-06 | 3,54855E-05 | miRNA          |
| ENSMUSG00000030263  | Lrmp            | lymphoid-restricted membrane protein [Source:MGI Symbol;Acc:MGI:108424]                                                            |        | 297,2753957  | -1,6872524 | -3,22042793 | 8,21434645 | 65,2492779 | 6,59984E-16 | 3,18037E-14 | protein_coding |
| ENSMUSG00000000732  | Icosl           | icos ligand [Source:MGI Symbol;Acc:MGI:1354701]                                                                                    |        | 32,94154682  | -1,6923395 | -3,23180343 | 5,03350525 | 65,9125466 | 4,71381E-16 | 2,32245E-14 | protein_coding |
| ENSMUSG00000024074  | Crim1           | cysteine rich transmembrane BMP regulator 1 (chordin like) [Source:MGI Symbol;Acc:MGI:1354756]                                     |        | 88,23129157  | -1,6952581 | -3,23834825 | 6,45885199 | 78,6909429 | 7,26278E-19 | 4,83613E-17 | protein_coding |
| ENSMUSG00000049191  | Rgag4           | retrotransposon gag domain containing 4 [Source:MGI Symbol;Acc:MGI:3045324]                                                        |        | 189,00325314 | -1,7211687 | -3,29703396 | 7,56062731 | 75,2573308 | 4,13195E-18 | 2,45393E-16 | protein_coding |
| ENSMUSG00000039611  | Tmem246         | transmembrane protein 246 [Source:MGI Symbol;Acc:MGI:1914313]                                                                      |        | 1,82127017   | -1,7288256 | -3,31457888 | 0,85690694 | 15,2905337 | 9,21773E-05 | 0,000633762 | protein_coding |
| ENSMUSG00000086184  | Gm12764         | predicted gene 12764 [Source:MGI Symbol;Acc:MGI:3649980]                                                                           |        | 5,400334025  | -1,7387881 | -3,33754686 | 2,41311878 | 28,0331826 | 1,19253E-07 | 1,54327E-06 | antisense      |
| ENSMUSG00000004633  | Chn2            | chimerin (chimaerin) 2 [Source:MGI Symbol;Acc:MGI:1917243]                                                                         |        | 2,661515516  | -1,7422652 | -3,34560049 | 1,36557254 | 19,6632099 | 9,32626E-06 | 8,08241E-05 | protein_coding |
| ENSMUSG000000048031 | Fcrl5           | Fc receptor-like 5 [Source:MGI Symbol;Acc:MGI:3053558]                                                                             |        | 115,6481137  | -1,7506073 | -3,36500181 | 6,85265601 | 92,1868506 | 7,88671E-22 | 7,40609E-20 | protein_coding |
| ENSMUSG00000031257  | Nox1            | NADPH oxidase 1 [Source:MGI Symbol;Acc:MGI:2450016]                                                                                |        | 8,911652443  | -1,7655681 | -3,40007851 | 3,14872029 | 45,187432  | 1,7905E-11  | 4,48116E-10 | protein_coding |
| ENSMUSG00000036432  | Siah2           | seven in absentia 2 [Source:MGI Symbol;Acc:MGI:108062]                                                                             |        | 56,10265053  | -1,7901719 | -3,45856099 | 5,80324755 | 66,9073684 | 2,84569E-16 | 1,4159E-14  | protein_coding |
| ENSMUSG00000030029  | Lrig1           | leucine-rich repeats and immunoglobulin-like domains 1 [Source:MGI Symbol;Acc:MGI:107935]                                          |        | 3,145423919  | -1,8270736 | -3,54816612 | 1,62538566 | 22,5903048 | 2,00494E-06 | 2,03965E-05 | protein_coding |
| ENSMUSG00000041594  | Tmtc4           | transmembrane and tetra-tyrosine repeat containing 4 [Source:MGI Symbol;Acc:MGI:1921050]                                           |        | 216,8780649  | -1,8331362 | -3,56310799 | 7,75923799 | 87,0235949 | 1,07234E-20 | 8,6631E-19  | protein_coding |
| ENSMUSG00000031523  | Dlc1            | deleted in liver cancer 1 [Source:MGI Symbol;Acc:MGI:1354949]                                                                      |        | 3,756992627  | -1,8366578 | -3,56439647 | 1,8866636  | 28,8335401 | 7,88733E-08 | 1,0581E-06  | protein_coding |
| ENSMUSG00000050350  | Gpr18           | G protein-coupled receptor 18 [Source:MGI Symbol;Acc:MGI:107859]                                                                   |        | 17,97335192  | -1,8352621 | -3,56836232 | 4,15784417 | 59,6541599 | 1,1308E-14  | 4,45308E-13 | protein_coding |
| ENSMUSG00000038860  | Garnl3          | GTase activating RANGAP domain-like 3 [Source:MGI Symbol;Acc:MGI:2139309]                                                          |        | 20,50731673  | -1,8421331 | -3,58539746 | 4,33944048 | 51,8284151 | 6,05689E-13 | 1,84853E-11 | protein_coding |
| ENSMUSG00000004359  | Spic            | Spi-C transcription factor (Spi-1/PU.1 related) [Source:MGI Symbol;Acc:MGI:1341168]                                                |        | 25,99766297  | -1,8528893 | -3,61222891 | 4,70230891 | 61,4416979 | 4,56049E-15 | 1,90518E-13 | protein_coding |
| ENSMUSG00000020256  | Aldh1l2         | aldehyde dehydrogenase 1 family, member L2 [Source:MGI Symbol;Acc:MGI:2444680]                                                     |        | 5,777446677  | -1,8849474 | -3,69339463 | 2,4867276  | 22,5420561 | 2,05593E-06 | 2,08728E-05 | protein_coding |
| ENSMUSG00000016756  | Cmah            | cytidine monophosphate-N-acetylnneuraminic acid hydroxylase [Source:MGI Symbol;Acc:MGI:103227]                                     |        | 22,53240663  | -1,8849665 | -3,69344345 | 4,46937762 | 114,526418 | 9,99261E-27 | 1,48363E-24 | protein_coding |
| ENSMUSG00000036006  | Fam65b          | family with sequence similarity 65, member B [Source:MGI Symbol;Acc:MGI:2444879]                                                   |        | 14,29033354  | -1,9001359 | -3,72483851 | 3,82176013 | 67,2590033 | 2,38081E-16 | 1,19991E-14 | protein_coding |
| ENSMUSG00000038807  | Rap1gap2        | RAP1 GTase activating protein 2 [Source:MGI Symbol;Acc:MGI:3028623]                                                                |        | 51,91743363  | -1,9177253 | -3,7782687  | 5,69596175 | 75,9319496 | 2,93611E-18 | 1,78227E-16 | protein_coding |
| ENSMUSG00000039221  | Rpl2l1          | ribosomal protein L22 like 1 [Source:MGI Symbol;Acc:MGI:1915278]                                                                   |        | 54,81793473  | -1,9202627 | -3,78493099 | 5,7711332  | 73,9743262 | 7,91397E-18 | 4,60057E-16 | protein_coding |
| ENSMUSG00000034427  | Myo15b          | myosin XVb [Source:MGI Symbol;Acc:MGI:2685534]                                                                                     |        | 16,09077307  | -1,9528927 | -3,87150015 | 3,98305933 | 62,5126554 | 2,64738E-15 | 1,1776E-13  | protein_coding |
| ENSMUSG00000025432  | Avil            | advillin [Source:MGI Symbol;Acc:MGI:1333798]                                                                                       |        | 4,445459897  | -1,9584558 | -3,88645763 | 2,12421278 | 25,6206887 | 4,15564E-07 | 4,79601E-06 | protein_coding |
| ENSMUSG00000095334  | 545451647       | 1,986089                                                                                                                           |        | 6,545451647  | -1,986089  | -3,96161584 | 2,68661541 | 40,312165  | 2,16457E-10 | 4,61789E-09 | protein_coding |
| ENSMUSG00000027347  | Rasgrp1         | RAS guanyl releasing protein 1 [Source:MGI Symbol;Acc:MGI:1314635]                                                                 |        | 72,59897696  | -2,040841  | -4,11485319 | 6,17826878 | 51,5553096 | 6,96082E-13 | 2,10106E-11 | protein_coding |
| ENSMUSG00000075463  | 4930594M22RIKEN | RIKEN cDNA 4930594M22 gene [Source:MGI Symbol;Acc:MGI:1925478]                                                                     |        | 4,008462458  | -2,0559506 | -4,15817538 | 1,98747637 | 27,6741698 | 1,43567E-07 | 1,82091E-06 | lincRNA        |
| ENSMUSG00000031770  | Herpud1         | homocysteine-inducible, endoplasmic reticulum stress-inducible, ubiquitin-like domain member 1 [Source:MGI Symbol;Acc:MGI:2448682] |        | 264,3486892  | -2,0668463 | -4,18969803 | 8,04517559 | 64,5403991 | 9,45732E-16 | 4,4405E-14  | protein_coding |
| ENSMUSG00000048498  | Cd300e          | CD300e antigen [Source:MGI Symbol;Acc:MGI:2387602]                                                                                 |        | 96,14390299  | -2,0990269 | -4,28420274 | 6,58865324 | 86,2593055 | 1,57823E-20 | 1,24748E-18 | protein_coding |
| ENSMUSG00000080670  | Ncr3-ps         | natural cytotoxicity triggering receptor 3, pseudogene [Source:MGI Symbol;Acc:MGI:2149332]                                         |        | 2,23762866   | -2,1067428 | -4,3071775  | 1,09207147 | 24,7648218 | 6,47688E-07 | 7,27766E-06 | pseudogene     |
| ENSMUSG00000091421  | Gm4202          | predicted gene 4202 [Source:MGI Symbol;Acc:MGI:3782379]                                                                            |        | 8,870827688  | -2,120     |             |            |            |             |             |                |

|                     |         |                                                                                                                           |        |             |            |                    |            |            |             |             |                |
|---------------------|---------|---------------------------------------------------------------------------------------------------------------------------|--------|-------------|------------|--------------------|------------|------------|-------------|-------------|----------------|
| ENSMUSG00000090185  | Gm15523 | predicted gene 15523 [Source:MGI Symbol;Acc:MGI:3782970]                                                                  | Sheet1 | 2,231510036 | -2,3217867 | <b>-4,9995101</b>  | 1,12746715 | 30,0058027 | 4,30755E-08 | 6,12252E-07 | antisense      |
| ENSMUSG00000038264  | Sema7a  | sema domain, immunoglobulin domain (Ig), and GPI membrane anchor, (semaphorin) 7A [Source:MGI Symbol;Acc:MGI:50,15200228] |        | 50,15200228 | -2,3268982 | <b>-5,0172549</b>  | 5,6413175  | 74,0249876 | 7,71344E-18 | 4,50785E-16 | protein_coding |
| ENSMUSG00000022747  | St3gal6 | ST3 beta-galactoside alpha-2,3-sialyltransferase 6 [Source:MGI Symbol;Acc:MGI:1888707]                                    |        | 8,283443403 | -2,3275234 | <b>-5,01942947</b> | 3,03581354 | 48,4098384 | 3,45829E-12 | 9,54679E-11 | protein_coding |
| ENSMUSG00000034258  | Mfsd7c  | major facilitator superfamily domain containing 7C [Source:MGI Symbol;Acc:MGI:2384974]                                    |        | 34,84080047 | -2,3623674 | <b>-5,14213475</b> | 5,12256655 | 121,732811 | 2,64116E-28 | 4,39673E-26 | protein_coding |
| ENSMUSG000000051159 | Cited1  | Cbp/p300-interacting transactivator with Glu/Asp-rich carboxy-terminal domain 1 [Source:MGI Symbol;Acc:MGI:108023]        |        | 2,731476344 | -2,3766232 | <b>-5,19319789</b> | 1,51727689 | 29,5191761 | 5,53662E-08 | 7,71965E-07 | protein_coding |
| ENSMUSG00000002007  | Srpk3   | serine/arginine-rich protein specific kinase 3 [Source:MGI Symbol;Acc:MGI:1891338]                                        |        | 19,10151401 | -2,4234642 | <b>-5,36457621</b> | 4,23787956 | 108,281667 | 2,33171E-25 | 3,01395E-23 | protein_coding |
| ENSMUSG000000021200 | Asb2    | ankyrin repeat and SOCS box-containing 2 [Source:MGI Symbol;Acc:MGI:1929743]                                              |        | 136,6106136 | -2,5170688 | <b>-5,72417891</b> | 7,0901956  | 118,420758 | 1,40247E-27 | 2,20127E-25 | protein_coding |
| ENSMUSG00000009092  | Der13   | Der1-like domain family, member 3 [Source:MGI Symbol;Acc:MGI:1917627]                                                     |        | 4,090866181 | -2,5269749 | <b>-5,76361857</b> | 2,00014008 | 24,5563425 | 7,21684E-07 | 8,04989E-06 | protein_coding |
| ENSMUSG000000076617 | Ighm    | immunoglobulin heavy constant mu [Source:MGI Symbol;Acc:MGI:96448]                                                        |        | 119,5538928 | -2,5893475 | <b>-6,01826464</b> | 6,89903972 | 48,4805167 | 3,33587E-12 | 9,25534E-11 | IG_C_gene      |
| ENSMUSG00000004709  | Cd244   | CD244 natural killer cell receptor 2B4 [Source:MGI Symbol;Acc:MGI:109294]                                                 |        | 66,64149383 | -2,6915279 | <b>-6,45997193</b> | 6,05380934 | 67,2891997 | 2,34462E-16 | 1,18711E-14 | protein_coding |
| ENSMUSG000000024399 | Ltb     | lymphotoxin B [Source:MGI Symbol;Acc:MGI:104796]                                                                          |        | 23,43888494 | -2,7952188 | <b>-6,94136217</b> | 4,53875037 | 76,5671695 | 2,12849E-18 | 1,32873E-16 | protein_coding |
| ENSMUSG000000008193 | Spib    | Spi-B transcription factor (Spi-1/PU.1 related) [Source:MGI Symbol;Acc:MGI:892986]                                        |        | 8,453335055 | -2,917058  | <b>-7,55304324</b> | 3,02308314 | 82,0679894 | 1,31485E-19 | 9,26042E-18 | protein_coding |
| ENSMUSG000000028782 | Bai2    | brain-specific angiogenesis inhibitor 2 [Source:MGI Symbol;Acc:MGI:2451244]                                               |        | 18,91189004 | -3,0812807 | <b>-8,46365449</b> | 4,22742811 | 73,8927143 | 8,24802E-18 | 4,76952E-16 | protein_coding |
| ENSMUSG000000073940 | Hbb-b2  | hemoglobin, beta adult minor chain [Source:MGI Symbol;Acc:MGI:96022]                                                      |        | 8,235784846 | -3,3496883 | <b>-10,1942822</b> | 3,014136   | 53,6768066 | 2,36337E-13 | 7,72808E-12 | protein_coding |
